# Supplementary material for: Identifying an immunogenic cell death-related gene signature contributes to predicting prognosis, immunotherapy efficacy, and tumor microenvironment of lung adenocarcinoma
Source: Aging (Albany NY). 2024 Apr 3;16(7):6290–313. doi: 10.18632/aging.205705 (PMC11042933; doi:10.18632/aging.205705)
Supplement: Supplementary Tables 1 and 2 [file aging-16-205705-s002.xlsx]

## Sheet: Supplementary Table 1
Supplementary Table 1: Summary of 1033 DEGs.
NT5E
GVINP1
IL10RA
ARHGAP25
PTPRC
TRAF3IP3
WAS
CD48
NCF1
CD247
KLRB1
IL16
PPP1R16B
SLAMF1
PRKCB
LAX1
IKZF1
CD6
FLI1
PLA2G2D
LY9
TNFRSF1B
ADAMDEC1
NPL
GIMAP6
EVI2B
GIMAP4
MET
AOAH
DOCK2
CXCR6
TFEC
NKG7
IRF4
CD53
ITK
ZAP70
SASH3
ITGAL
CCL5
IL2RG
SH2D1A
GPR18
MS4A1
IL18RAP
BIN2
CD2
MAP4K1
DCBLD2
HCLS1
MYO1F
SLA
AMIGO2
CSF2RB
PECAM1
NCKAP1L
CD79B
CD27
CARD8
GPR65
LPXN
ARHGEF6
CD3E
LILRB1
ACAP1
RHOH
IRF8
CYTIP
GZMA
GALNT10
TLR4
GZMK
TRAT1
CD3G
SPIB
CYTH4
WIPF1
PYHIN1
CD3D
CD180
LCK
CORO1A
CD37
PDE4B
GMFG
PRKCQ
IL2RB
UPP1
SIT1
PTPN7
PRF1
P2RY10
PLEK
GYPC
TNFRSF17
NELL2
CD1D
SIRPG
CCR7
GZMB
GPR171
FGL2
PLCG2
LILRB2
MFNG
BTK
LCP2
CXCL13
DOK3
SELL
RAB38
PSTPIP1
CD226
CXCR3
SLAMF7
SLC2A6
PRDM1
NR1H3
LILRB4
PLA2G7
ITGB7
UBASH3A
PTGDS
CMKLR1
P2RX1
RASSF2
APBB1IP
PTTG1IP
CD72
S1PR1
RASGRP3
GZMH
STAP1
CD8A
DENND1C
DPEP2
KLRD1
CXCR4
TLR8
CARD10
IFFO1
EVL
RUNX3
ITM2A
CTSS
GFI1
ICAM3
CD7
CXCR5
EVI2A
PLEKHO2
SAMSN1
PIK3CG
LAPTM5
CCDC69
IGFLR1
KCNN4
ZBP1
APOE
LILRB3
BCL11B
CD22
IL7R
RASGRP2
ITGA2
STAT5A
DUSP6
NCR3
CR1
CD4
ACVR1
FGR
PLCL2
DPY19L1
FASLG
CD96
SLAMF8
CD84
SEMA4D
APOL3
STX11
LMO2
CD5
PTGDR
P2RY13
INPP5D
VNN2
ABCD2
CCL4
MS4A6A
CYBB
CCL19
EREG
TBX21
CXCL9
SLC7A7
STK10
SELPLG
CD86
SAMHD1
CRTAM
LAIR1
BCL10
CD52
LCP1
CCR2
LRMP
IL21R
CCR5
GM2A
LAG3
LGALS2
CAPN2
SPATS2L
CCR1
MICAL1
BLNK
CFP
ZEB2
KLRG1
KMO
CDC42EP1
ARRB2
ENPP2
EPB41L3
IFNG
LTA
DNASE1L3
STAB1
TNC
BMP6
C1QA
IL12RB1
ICOS
STK4
ACP5
CLEC10A
BANK1
METTL7A
EPHA2
CST6
RASA1
ASPA
APOBEC3G
CALCRL
PILRA
SLC29A3
HECA
TNFSF8
LAP3
IL1RAP
HLA-DOB
GPNMB
HHEX
SPRY2
CD40LG
CDC42EP3
IL18BP
CTLA4
PIK3R5
SIGLEC8
CD163
FCGR2B
TMEM140
MAFB
PRKCH
HMOX1
MMP25
ITGAX
FPR3
MAN2B1
HPGD
MYCBP2
PTPN6
PTK2B
C1S
CLEC4E
SEMA3C
CYLD
FMNL1
EFNB2
LAMP3
PIK3CD
TMEM176B
PVRIG
PLEKHO1
NAGK
SLCO2B1
PDGFC
CD244
UBE2J1
TNFAIP3
FLT3
TCL1A
IRF1
ZFP36L1
FGD2
TLR7
LTB
C1QB
APOC1
FCGR3B
FAM49A
ENTPD1
APLP2
EBI3
LXN
ANXA6
TSPAN32
CCND2
HERC1
NCF4
MSL3
LILRB5
SIGLEC1
KCNAB2
GRAP2
HEG1
LIMK1
LILRA6
HLA-E
SLC15A3
C11orf21
PDLIM4
STEAP3
ENDOD1
CD28
IL24
CLIC5
IL33
FCER1G
ARID5A
LIMD2
MFSD1
BTN2A2
FNBP1
GADD45A
CBFA2T3
TEK
TNFRSF14
BTN3A3
SERPING1
P2RY14
PLS3
CXCL12
SNRK
FOXF1
PLAT
LYVE1
SRGN
CD14
SLC16A6
SLC1A3
MS4A4A
ABI3BP
DHRS7
DKK2
B2M
TCF4
TNFRSF8
TNIP3
JAM2
SH2B3
PLXNC1
VASH1
BCAR3
SYK
DOCK10
ITGA4
STAT4
CLEC1A
IDH2
RNASE6
SEC14L1
PSAP
KCNK5
HPS5
ANXA2
TLR1
ADPRH
CPVL
TNFSF14
HAAO
PPP3CA
IDO1
CSF2
SUMO3
RASSF4
LPAR6
GNLY
SLC31A2
C1orf54
IKZF3
LDB2
CST7
PARP3
SIRPA
COTL1
LILRA4
TRPV2
GAS7
S1PR4
JAK2
CD200
LSP1
NTHL1
EGFL6
ARSJ
ACVRL1
CXCL10
DCTD
CCL21
MAST3
MGAT1
FRMD4A
SLIT3
MYOF
CHST11
AIF1
HCK
ICAM2
MPP1
CYP1B1
RAI14
CASP1
PTGIS
TBXAS1
TGFBI
GJA5
PKP3
MAPKAPK3
SIGLEC7
CD69
CRLF3
NRP1
AP1S2
OSMR
SEL1L
IDS
LYZ
FEM1C
CD36
STAC
FHL5
LY86
ANXA3
DOK2
STK17A
GPR183
EGOT
LAT
TDO2
ADORA1
SNX10
ANXA1
PLCB2
C1GALT1
GBP1
CD93
PTGER4
ADAM8
CD300A
EDNRB
A2M
PLA1A
DENND3
KCTD12
CTDSPL
DPP4
CAST
HRH1
C5AR1
KCNJ5
POP7
SMURF2
GRB2
KLHL2
JAK3
RFX5
CSTA
TM6SF1
ZBTB32
PHB
CSF1R
APOL6
MSMB
FYN
STAT1
IL10
SYT11
SPARCL1
PALMD
CTSW
CR2
PTPRG
TNFRSF4
GPSM3
TXK
SNX7
CLEC2D
TACC1
DDX56
GPR137B
PCDH7
ZNF80
TYROBP
LILRA1
MAP3K14
FBLN1
GNG12
AOX1
POLD2
ITGB5
GALNT3
S100A10
ITIH5
FMO2
CHRDL1
MPZL2
AKR1C1
TBC1D9
BTN3A1
P2RX7
C1R
ATM
FPR1
CD58
PTPN12
FBLN5
MMRN1
SNCA
MRTO4
GTF2IRD1
PIEZO2
ENC1
RGS1
TK2
PLAU
HNMT
CDV3
WDR7
CCL18
HLA-DMB
TCF21
MED13L
LIPA
C3
LYL1
ABHD11
LGALS3
SKAP1
TMEM43
CD59
FCN1
HLX
NAIP
BHLHE40
ARID5B
CIITA
LY6E
SFTPC
SERPINB9
COL14A1
C3AR1
PAM
ACSM5
LST1
MAF
PNRC1
HSD11B1
CCDC102B
CDH3
ADPGK
ADH1B
MYO5A
FCER2
CBX7
RAC2
ARHGAP10
DMXL2
PRCP
CYTH3
TMEM47
G0S2
CX3CL1
CCL8
TAP1
MMP28
TYMP
PTAFR
RCBTB2
IFNGR2
IL12B
H1F0
MAP2K6
MYCT1
PDCD1LG2
RNF13
MGAT4A
CYFIP2
CDO1
CAMK2N1
PKNOX2
WNT2
CAB39
OLFML1
CEACAM21
SP110
TRAF3
ETS1
C7
KAT2B
VAV1
PTPN1
MNDA
ELK3
RNF125
CEP112
RAB27B
KIAA0040
UAP1L1
SIGLEC5
SFXN3
GNG7
USP25
QKI
TRAF4
MRPL28
RASGRP1
IQGAP2
MGLL
VCAM1
ATP10A
MT1F
FXYD1
AQP9
FGF13
GYPE
WARS
TUFT1
KSR1
PLIN3
SIGLEC9
KCNMA1
TIE1
NFATC1
ADAMTS1
BTN3A2
FRZB
OSTM1
MEFV
EPCAM
PHACTR1
DST
ANK3
RAB33A
MAN1C1
DNM3
THG1L
C8orf33
CRISPLD2
RAI2
ABCA8
BPGM
TCN2
FADS2
ABCA1
PLA2G4C
CELF2
MT1E
RAB8B
HS3ST1
HCG4
HOXD1
MMP19
TMEM51
CXCL11
SCN1A
ANXA2P2
ITPR1
HLA-DOA
TRIM22
FOXP3
KLF2
GLDC
SLC43A3
BCL2A1
DENND2D
IL3RA
SHARPIN
FGA
MOXD1
MAP3K3
ITGB2
CAMK4
RASL12
CD209
PSMB9
EMCN
SPI1
LY96
WDR74
ANO1
CLDN1
TRAF3IP2
RARRES2
TNF
HLA-F
DUSP7
EGR2
STARD8
OPTN
NFE2L3
RUNX1T1
CDKN1B
RBM38
ATP6V1B2
GBE1
TRIM45
DCN
INSIG2
KLF12
APP
GYG1
BLM
MICAL2
CAV2
MFAP4
TGFB2
GIT2
NCOA4
SFTPD
DUSP2
PSMB10
AKAP1
SVEP1
FER
AQP4
WLS
NLRP1
HLA-DPB1
CXorf21
ADAMTS8
MRPL52
FABP4
CD207
CCNG2
RORA
PDE3A
HLA-DPA1
MAP7
TAF7
EDEM1
KLRC4
CCR6
CCDC88A
PLEKHA2
HK3
WDFY3
KCNE4
MUL1
IRF5
S100P
AGTPBP1
ARHGEF11
LAMTOR3
CYP27A1
CEBPA
MYO9B
BCL2L1
SPN
CTSZ
CABYR
IL2RA
PAICS
ST8SIA1
TMED3
FAM198B
HLA-DMA
CSK
SERPINB1
DEF6
ITGA8
CD33
DNAJB9
FLNA
VSIG4
CD34
MYBPC2
SPCS3
PIK3IP1
IL17RA
IGSF6
FCHSD2
NOD2
PLCL1
LDOC1
TIPARP
GNA12
ABCA6
ART4
RALB
EFNA3
GMIP
EFR3A
BTN2A1
FRAT2
MEOX2
MCOLN1
RPS6KA3
CCRL2
PROSER1
MYO16
ABCG1
KCNA3
PAK4
BAALC
RAB40C
LRP5
ADAP2
CFD
HCP5
MKS1
MMP9
IL18R1
MSR1
TAP2
IL13RA2
CAT
CTNND2
BST1
TRIL
IL27RA
MEOX1
MATK
PROCR
OSBPL11
HSF1
DPT
SDCBP
RHOG
TRAM2
NAAA
CTSB
EMILIN2
ACTR3B
CATSPERB
DECR2
TLR6
DGUOK
CYSLTR2
RUSC1
RASA3
JAG1
CXCR2
CPS1
FEZ2
FPR2
GLIPR1
PREB
SLC6A20
ROR1
LRP1
RGS13
ACE
CASP10
ERG
SYTL2
PPARGC1A
CCL11
NSA2
ADRB2
PTPN22
SPTLC1
CTPS2
STK17B
RENBP
PHF11
NPTN
IL15RA
AKAP7
CLCN2
TXNDC15
TSC22D2
NIPSNAP1
MAP3K13
CSNK1A1
ETV1
PHACTR2
LHX6
EMP1
AOC3
HIP1
CREBL2
MCAT
IL15
UVRAG
EDIL3
CNTRL
EPB41L2
CYB5R4
DLG2
HDC
MEIS1
FLT3LG
C1QTNF1
PARP11
CCL2
DVL1
IQCG
TMEM134
DDX39A
FASN
CHAC1
BCAP29
LITAF
PDE4D
RGS9
SCARB2
GSN
RTN1
HOXA5
OR7E47P
GPM6A
CD83
CDC42EP4
C12orf4
WDR37
YIPF5
IL13RA1
RPL8
TBC1D4
IRAK4
NOP16
TFPI
TGFBR3
NLE1
FCGBP
GPC4
FCGR1A
EDNRA
CNGA3
GLUL
KIF5C
GRTP1
IRAK3
NGDN
IQGAP1
SNRPE
SIVA1
PML
PIK3C2B
PGM1
CD300C
ROBO1
PLEKHM1
PCGF2
STMN3
SDF2L1
CHN1
FECH
WDYHV1
POLR2J
PLA2G5
DENND4A
ALPL
ARID3A
RHBDL1
KLK13
ATG4A
FUT7
MVP
LBH
HLA-DRA
CCL17
CA3
NEDD4
MXRA7
SETX
HSP90B1
LRRN3
ABR
BARX1
BEST1
THPO
MCM7
KLK14
SEL1L3
UBE2L6
CASP5
CALCA
CLDN18
LUZP1
FBXO38
PCSK1
ANGPT1
TBC1D2B
DES
APOBEC3F
RB1
S100A8
TNFAIP2
SMARCA2
CRHBP
PIAS1
BMP2K
NECAB3
ATF4
CLEC2B
COL8A1
SLC39A4
SOX4
CFB
MDH2
SH3BP1
EIF2AK1
AGAP2
DBNDD1
MYL6B
MUC13
NRIP1
PMP22
MT2A
SESN1
NRTN
MAN1A1
TTC1
LRRK1
TAPBPL
SLC36A1
ATIC
MRPL17
PGD

## Sheet: Supplementary Table 2
Supplementary Table 2: Functional annotation of the differentially expressed genes between the three ICD subtypes.
ONTOLOGY	ID	Description	GeneRatio	BgRatio	pvalue	p.adjust	qvalue	geneID	Count
BP	GO:0042110	T cell activation	133/982	487/18723	1.89238e-59	1.00523e-55	6.9839e-56	PTPRC/WAS/CD48/SLAMF1/LAX1/CD6/PLA2G2D/LY9/TNFRSF1B/DOCK2/IRF4/ITK/ZAP70/SASH3/ITGAL/CCL5/GPR18/CD2/NCKAP1L/CD27/CD3E/LILRB1/RHOH/CD3G/CD3D/LCK/CORO1A/PRKCQ/SIT1/CD1D/SIRPG/CCR7/FGL2/LILRB2/SLAMF7/PRDM1/LILRB4/APBB1IP/CD8A/RUNX3/CD7/PIK3CG/LAPTM5/BCL11B/IL7R/CR1/CD4/CD84/CD5/CCL19/TBX21/CD86/CRTAM/BCL10/LCP1/CCR2/LAG3/IFNG/IL12RB1/ICOS/TNFSF8/HLA-DOB/GPNMB/CD40LG/CTLA4/FCGR2B/MAFB/PTPN6/PIK3CD/IR…	133
BP	GO:0007159	leukocyte cell-cell adhesion	109/982	371/18723	4.50331e-52	1.19608e-48	8.30979e-49	NT5E/PTPRC/SLAMF1/LAX1/CD6/PLA2G2D/ZAP70/SASH3/ITGAL/CCL5/PECAM1/NCKAP1L/CD27/CD3E/LILRB1/RHOH/LCK/CORO1A/PRKCQ/CD1D/SIRPG/CCR7/FGL2/LILRB2/SELL/LILRB4/ITGB7/RUNX3/LAPTM5/IL7R/CR1/CD4/SEMA4D/CD5/CCL19/TBX21/STK10/SELPLG/CD86/CRTAM/BCL10/CCR2/LAG3/IFNG/IL12RB1/ICOS/HLA-DOB/GPNMB/CD40LG/CTLA4/FCGR2B/PTPN6/IRF1/EBI3/HLA-E/CD28/BTN2A2/TNFRSF14/CXCL12/B2M/JAM2/SYK/ITGA4/TNFSF14/SIRPA/CCL21/AIF1/ANXA1/…	109
BP	GO:0050863	regulation of T cell activation	99/982	329/18723	2.44908e-48	4.3365e-45	3.01279e-45	PTPRC/SLAMF1/LAX1/CD6/PLA2G2D/TNFRSF1B/IRF4/ZAP70/SASH3/CCL5/CD2/NCKAP1L/CD27/CD3E/LILRB1/RHOH/LCK/CORO1A/PRKCQ/SIT1/CD1D/SIRPG/CCR7/FGL2/LILRB2/PRDM1/LILRB4/RUNX3/LAPTM5/IL7R/CR1/CD4/CD5/CCL19/TBX21/CD86/CRTAM/BCL10/CCR2/LAG3/IFNG/IL12RB1/ICOS/TNFSF8/HLA-DOB/GPNMB/CD40LG/CTLA4/FCGR2B/PTPN6/IRF1/EBI3/HLA-E/CD28/BTN2A2/TNFRSF14/B2M/SYK/TNFSF14/SIRPA/CCL21/AIF1/LAT/ANXA1/ADAM8/CD300A/DPP4/JAK3/FYN/…	99
BP	GO:1903037	regulation of leukocyte cell-cell adhesion	98/982	336/18723	1.70015e-46	2.21204e-43	1.53682e-43	PTPRC/SLAMF1/LAX1/CD6/PLA2G2D/ZAP70/SASH3/CCL5/NCKAP1L/CD27/CD3E/LILRB1/RHOH/LCK/CORO1A/PRKCQ/CD1D/SIRPG/CCR7/FGL2/LILRB2/LILRB4/RUNX3/LAPTM5/IL7R/CR1/CD4/CD5/CCL19/TBX21/CD86/CRTAM/BCL10/CCR2/LAG3/IFNG/IL12RB1/ICOS/HLA-DOB/GPNMB/CD40LG/CTLA4/FCGR2B/PTPN6/IRF1/EBI3/HLA-E/CD28/BTN2A2/TNFRSF14/CXCL12/B2M/SYK/ITGA4/TNFSF14/SIRPA/CCL21/AIF1/ANXA1/ADAM8/CD300A/DPP4/JAK3/FYN/IL10/HLA-DMB/LGALS3/SKAP1/H…	98
BP	GO:0002683	negative regulation of immune system process	111/982	434/18723	2.08212e-46	2.21204e-43	1.53682e-43	PTPRC/SLAMF1/LAX1/PLA2G2D/SH2D1A/GPR18/NCKAP1L/LPXN/LILRB1/TLR4/FGL2/LILRB2/BTK/NR1H3/LILRB4/UBASH3A/STAP1/KLRD1/RUNX3/SAMSN1/LAPTM5/LILRB3/CD22/IL7R/CR1/FGR/PLCL2/CD96/SLAMF8/CD84/INPP5D/TBX21/CD86/SAMHD1/CRTAM/CCR2/LAG3/ARRB2/BANK1/HLA-DOB/GPNMB/CTLA4/FCGR2B/MAFB/HMOX1/PTPN6/TMEM176B/PVRIG/TNFAIP3/IRF1/TSPAN32/HLA-E/BTN2A2/TNFRSF14/SERPING1/CXCL12/FOXF1/SYK/SEC14L1/CST7/PARP3/CD200/CCL21/HCK/AD…	111
BP	GO:0002697	regulation of immune effector process	98/982	339/18723	4.10367e-46	3.63312e-43	2.52412e-43	PTPRC/WAS/NCF1/SLAMF1/TNFRSF1B/IRF4/SASH3/SH2D1A/IL18RAP/NCKAP1L/LILRB1/TLR4/CD1D/FGL2/PLCG2/BTK/CD226/LILRB4/STAP1/KLRD1/LAPTM5/CD22/IL7R/NCR3/CR1/FGR/CD96/SLAMF8/CD84/CCL19/TBX21/CD86/CRTAM/BCL10/CCR2/LAG3/ARRB2/IFNG/LTA/DNASE1L3/IL12RB1/CD40LG/FCGR2B/HMOX1/PTPN6/CD244/HLA-E/CD28/TNFRSF14/SERPING1/FOXF1/B2M/SYK/PARP3/CD36/ANXA1/CD300A/A2M/JAK3/PHB/IL10/CR2/TNFRSF4/TYROBP/HLA-DMB/C3/LGALS3/CD59/…	98
BP	GO:0050900	leukocyte migration	102/982	369/18723	5.25845e-46	3.99041e-43	2.77235e-43	IL16/SLAMF1/ZAP70/ITGAL/CCL5/GPR18/PECAM1/NCKAP1L/RHOH/LCK/CORO1A/PDE4B/CCR7/CXCL13/SELL/CXCR3/PLA2G7/ITGB7/CMKLR1/S1PR1/STAP1/CXCR4/CXCR5/PIK3CG/ITGA2/SLAMF8/CCL4/CCL19/TBX21/CXCL9/STK10/SELPLG/CRTAM/CCR2/CCR5/CCR1/HMOX1/PTK2B/PIK3CD/FCER1G/TNFRSF14/CXCL12/JAM2/SYK/ITGA4/SIRPA/CD200/CXCL10/CCL21/AIF1/HCK/MPP1/GPR183/ADORA1/ANXA1/PTGER4/ADAM8/CD300A/EDNRB/DPP4/HRH1/C5AR1/CSF1R/FYN/IL10/GPSM3/CCL1…	102
BP	GO:0030098	lymphocyte differentiation	101/982	374/18723	1.52057e-44	1.00966e-41	7.01462e-42	PTPRC/SLAMF1/IKZF1/PLA2G2D/LY9/DOCK2/IRF4/ITK/ZAP70/SASH3/GPR18/MS4A1/CD2/NCKAP1L/CD79B/CD27/CD3E/RHOH/IRF8/CD3G/CD3D/LCK/CD1D/CCR7/FGL2/PLCG2/LILRB2/MFNG/BTK/PRDM1/LILRB4/CD8A/RUNX3/ITM2A/BCL11B/IL7R/CR1/CD4/PLCL2/SLAMF8/INPP5D/CCL19/TBX21/CD86/CRTAM/CCR2/LAG3/BLNK/IFNG/IL12RB1/TNFSF8/HHEX/CD40LG/CTLA4/FCGR2B/MAFB/PTPN6/PTK2B/PIK3CD/FLT3/IRF1/ZFP36L1/CD28/FCER1G/B2M/SYK/DOCK10/ITGA4/IKZF3/GPR183…	101
BP	GO:0022407	regulation of cell-cell adhesion	109/982	448/18723	2.60112e-43	1.53524e-40	1.06661e-40	PTPRC/SLAMF1/LAX1/CD6/PLA2G2D/ZAP70/SASH3/CCL5/NCKAP1L/CD27/CD3E/LILRB1/RHOH/LCK/CORO1A/PRKCQ/CD1D/SIRPG/CCR7/FGL2/LILRB2/CXCL13/LILRB4/RUNX3/LAPTM5/IL7R/CR1/CD4/CD5/CCL19/TBX21/CD86/CRTAM/BCL10/CCR2/LAG3/IFNG/BMP6/IL12RB1/ICOS/HLA-DOB/GPNMB/CD40LG/CTLA4/FCGR2B/PTPN6/IRF1/EBI3/HLA-E/CD28/BTN2A2/TNFRSF14/CXCL12/B2M/SH2B3/SYK/ITGA4/TNFSF14/SIRPA/JAK2/CCL21/AIF1/ANXA1/ADAM8/CD300A/DPP4/JAK3/FYN/IL10…	109
BP	GO:1903131	mononuclear cell differentiation	106/982	426/18723	4.24696e-43	2.25599e-40	1.56735e-40	PTPRC/SLAMF1/IKZF1/PLA2G2D/LY9/DOCK2/IRF4/ITK/ZAP70/SASH3/GPR18/MS4A1/CD2/NCKAP1L/CD79B/CD27/CD3E/LILRB1/RHOH/IRF8/CD3G/CD3D/LCK/CD1D/CCR7/FGL2/PLCG2/LILRB2/MFNG/BTK/PRDM1/LILRB4/CD8A/RUNX3/ITM2A/BCL11B/IL7R/CR1/CD4/PLCL2/SLAMF8/INPP5D/CCL19/TBX21/CD86/CRTAM/CCR2/LAG3/BLNK/IFNG/IL12RB1/TNFSF8/HHEX/CD40LG/CTLA4/FCGR2B/MAFB/PTPN6/PTK2B/PIK3CD/TMEM176B/FLT3/IRF1/ZFP36L1/CD28/FCER1G/B2M/SYK/DOCK10/IT…	106
BP	GO:0001819	positive regulation of cytokine production	111/982	467/18723	4.76062e-43	2.29894e-40	1.5972e-40	PTPRC/IL16/SLAMF1/CD6/LY9/IRF4/ITK/SASH3/CD2/CARD8/CD3E/LILRB1/IRF8/TLR4/PYHIN1/PDE4B/PRKCQ/CCR7/PLCG2/LILRB2/CD226/TLR8/PIK3CG/LAPTM5/CD4/FGR/CD84/CYBB/CCL19/EREG/CD86/CRTAM/BCL10/CCR2/IFNG/LTA/IL12RB1/IL1RAP/CD40LG/HMOX1/PIK3CD/CD244/IRF1/TLR7/LTB/EBI3/HEG1/HLA-E/CD28/IL33/FCER1G/TNFRSF14/CD14/B2M/TNFRSF8/SYK/TLR1/CSF2/JAK2/CD200/AIF1/CYP1B1/CASP1/CD36/ANXA1/PTGER4/ADAM8/C5AR1/PHB/CSF1R/STAT1/I…	111
BP	GO:1903039	positive regulation of leukocyte cell-cell adhesion	79/982	239/18723	5.2046e-42	2.2525e-39	1.56493e-39	PTPRC/SLAMF1/CD6/ZAP70/SASH3/CCL5/NCKAP1L/CD27/CD3E/LILRB1/RHOH/LCK/CORO1A/PRKCQ/CD1D/SIRPG/CCR7/LILRB2/LILRB4/RUNX3/IL7R/CR1/CD4/CD5/CCL19/CD86/BCL10/CCR2/IFNG/IL12RB1/ICOS/HLA-DOB/CD40LG/PTPN6/EBI3/HLA-E/CD28/TNFRSF14/B2M/SYK/ITGA4/TNFSF14/SIRPA/CCL21/AIF1/ANXA1/ADAM8/DPP4/JAK3/FYN/HLA-DMB/SKAP1/HLX/PTAFR/IL12B/PDCD1LG2/ETS1/VAV1/RASGRP1/VCAM1/HLA-DOA/FOXP3/ITGB2/CD209/TNF/HLA-DPB1/HLA-DPA1/IL2…	79
BP	GO:0045785	positive regulation of cell adhesion	106/982	437/18723	5.51251e-42	2.2525e-39	1.56493e-39	PTPRC/SLAMF1/CD6/ZAP70/SASH3/CCL5/NCKAP1L/CD27/CD3E/LILRB1/RHOH/LCK/CORO1A/PRKCQ/CD1D/SIRPG/CCR7/LILRB2/CXCL13/LILRB4/APBB1IP/RUNX3/IL7R/ITGA2/CR1/CD4/CD5/CCL19/CD86/BCL10/CCR2/IFNG/IL12RB1/ICOS/STK4/HLA-DOB/CD40LG/PTPN6/PTK2B/EBI3/HLA-E/CD28/TEK/TNFRSF14/CXCL12/FOXF1/B2M/SYK/ITGA4/TNFSF14/PPP3CA/SIRPA/JAK2/EGFL6/CCL21/AIF1/NRP1/CD36/ANXA1/ADAM8/DPP4/JAK3/FYN/IL10/S100A10/ATM/HLA-DMB/SKAP1/HLX/CY…	106
BP	GO:0002764	immune response-regulating signaling pathway	109/982	468/18723	2.25368e-41	8.5511e-39	5.9409e-39	PTPRC/CD247/PRKCB/LAX1/IRF4/ITK/ZAP70/SH2D1A/MS4A1/NCKAP1L/CD79B/LPXN/CD3E/LILRB1/TLR4/TRAT1/LCK/PDE4B/PRKCQ/CCR7/PLCG2/LILRB2/BTK/LCP2/CD226/NR1H3/LILRB4/UBASH3A/CMKLR1/STAP1/KLRD1/TLR8/CTSS/GFI1/LAPTM5/KCNN4/CD22/NCR3/CR1/FGR/PLCL2/INPP5D/BCL10/BLNK/ARRB2/BANK1/CTLA4/FCGR2B/PRKCH/FPR3/PTPN6/CLEC4E/CYLD/PIK3CD/PVRIG/TNFAIP3/IRF1/TLR7/LIMK1/SLC15A3/CD28/FCER1G/BTN2A2/BTN3A3/CD14/TNIP3/SYK/SEC14L1…	109
BP	GO:0022409	positive regulation of cell-cell adhesion	85/982	284/18723	2.43022e-41	8.60621e-39	5.97919e-39	PTPRC/SLAMF1/CD6/ZAP70/SASH3/CCL5/NCKAP1L/CD27/CD3E/LILRB1/RHOH/LCK/CORO1A/PRKCQ/CD1D/SIRPG/CCR7/LILRB2/CXCL13/LILRB4/RUNX3/IL7R/CR1/CD4/CD5/CCL19/CD86/BCL10/CCR2/IFNG/IL12RB1/ICOS/HLA-DOB/CD40LG/PTPN6/EBI3/HLA-E/CD28/TNFRSF14/B2M/SYK/ITGA4/TNFSF14/SIRPA/JAK2/CCL21/AIF1/ANXA1/ADAM8/DPP4/JAK3/FYN/IL10/HLA-DMB/SKAP1/HLX/CX3CL1/PTAFR/IL12B/PDCD1LG2/ETS1/VAV1/RASGRP1/VCAM1/ANK3/HLA-DOA/FOXP3/FGA/ITGB…	85
BP	GO:0070661	leukocyte proliferation	89/982	318/18723	1.19442e-40	3.96547e-38	2.75502e-38	PTPRC/SLAMF1/CD6/PLA2G2D/TNFRSF1B/DOCK2/ZAP70/SASH3/CCL5/MS4A1/NCKAP1L/CD3E/LILRB1/TLR4/CD180/CORO1A/PRKCQ/CD1D/LILRB2/BTK/LILRB4/PIK3CG/CD22/IL7R/CR1/PLCL2/INPP5D/CCL19/CD86/CRTAM/CCR2/IL12RB1/TNFSF8/GPNMB/HHEX/CD40LG/CTLA4/FCGR2B/PTPN6/TNFAIP3/FLT3/IRF1/EBI3/HLA-E/CD28/IL33/BTN2A2/TNFRSF14/SYK/TNFSF14/IKZF3/AIF1/GPR183/ANXA1/CD300A/JAK3/CSF1R/FYN/IL10/CR2/TNFRSF4/TYROBP/BTN3A1/ATM/HLA-DMB/LGALS…	89
BP	GO:0019221	cytokine-mediated signaling pathway	108/982	472/18723	3.18034e-40	9.93761e-38	6.90418e-38	IL10RA/PTPRC/TNFRSF1B/CXCR6/CCL5/IL2RG/IL18RAP/CSF2RB/CARD8/LILRB1/IL2RB/TNFRSF17/CCR7/LILRB2/CXCL13/CXCR3/NR1H3/LILRB4/CMKLR1/STAP1/CXCR4/GFI1/CXCR5/LAPTM5/ZBP1/LILRB3/IL7R/STAT5A/CD4/CCL4/CCL19/EREG/CXCL9/SAMHD1/CCR2/IL21R/CCR5/CCR1/IFNG/IL12RB1/IL1RAP/PTPN6/PTK2B/CYLD/TNFAIP3/FLT3/IRF1/EBI3/LILRB5/LILRA6/IL33/FCER1G/TNFRSF14/CXCL12/SH2B3/SYK/STAT4/LILRA4/JAK2/CXCL10/CCL21/SLIT3/HCK/CASP1/OSMR/…	108
BP	GO:0002443	leukocyte mediated immunity	103/982	440/18723	2.6163e-39	7.72098e-37	5.36417e-37	PTPRC/WAS/SLAMF1/TNFRSF1B/SASH3/SH2D1A/IL18RAP/NCKAP1L/CD27/LILRB1/TLR4/CORO1A/PRF1/CD1D/GZMB/PLCG2/BTK/CD226/SLAMF7/LILRB4/PTGDS/STAP1/CD8A/KLRD1/TLR8/PIK3CG/IL7R/NCR3/CR1/FGR/CD96/CD84/PTGDR/INPP5D/TBX21/CRTAM/BCL10/CCR2/LAG3/ARRB2/LTA/DNASE1L3/C1QA/IL12RB1/HLA-DOB/CD40LG/FCGR2B/HMOX1/PTPN6/C1S/PIK3CD/C1QB/HLA-E/CD28/FCER1G/BTN3A3/SERPING1/FOXF1/B2M/SYK/PARP3/ANXA3/LAT/CD300A/JAK3/IL10/CR2/TYRO…	103
BP	GO:0050870	positive regulation of T cell activation	72/982	216/18723	1.25036e-38	3.35938e-36	2.33394e-36	PTPRC/SLAMF1/CD6/ZAP70/SASH3/CCL5/NCKAP1L/CD27/CD3E/LILRB1/RHOH/LCK/CORO1A/PRKCQ/CD1D/SIRPG/CCR7/LILRB2/LILRB4/RUNX3/IL7R/CR1/CD4/CD5/CCL19/CD86/BCL10/CCR2/IFNG/IL12RB1/ICOS/HLA-DOB/CD40LG/PTPN6/EBI3/HLA-E/CD28/TNFRSF14/B2M/SYK/TNFSF14/SIRPA/CCL21/AIF1/ANXA1/ADAM8/DPP4/JAK3/FYN/HLA-DMB/HLX/IL12B/PDCD1LG2/VAV1/RASGRP1/VCAM1/HLA-DOA/FOXP3/CD209/HLA-DPB1/HLA-DPA1/IL2RA/HLA-DMA/CSK/NOD2/IL27RA/PTPN22…	72
BP	GO:0032943	mononuclear cell proliferation	83/982	291/18723	1.26483e-38	3.35938e-36	2.33394e-36	PTPRC/SLAMF1/CD6/PLA2G2D/TNFRSF1B/DOCK2/ZAP70/SASH3/CCL5/MS4A1/NCKAP1L/CD3E/LILRB1/TLR4/CD180/CORO1A/PRKCQ/CD1D/LILRB2/BTK/LILRB4/PIK3CG/CD22/IL7R/CR1/PLCL2/INPP5D/CCL19/CD86/CRTAM/CCR2/IL12RB1/TNFSF8/GPNMB/CD40LG/CTLA4/FCGR2B/PTPN6/FLT3/IRF1/EBI3/HLA-E/CD28/BTN2A2/TNFRSF14/SYK/TNFSF14/IKZF3/AIF1/GPR183/ANXA1/CD300A/JAK3/FYN/IL10/CR2/TNFRSF4/TYROBP/BTN3A1/ATM/HLA-DMB/LGALS3/LST1/RAC2/IL12B/PDCD1L…	83
BP	GO:0046651	lymphocyte proliferation	82/982	288/18723	4.19749e-38	1.06177e-35	7.37665e-36	PTPRC/SLAMF1/CD6/PLA2G2D/TNFRSF1B/DOCK2/ZAP70/SASH3/CCL5/MS4A1/NCKAP1L/CD3E/LILRB1/TLR4/CD180/CORO1A/PRKCQ/CD1D/LILRB2/BTK/LILRB4/PIK3CG/CD22/IL7R/CR1/PLCL2/INPP5D/CCL19/CD86/CRTAM/CCR2/IL12RB1/TNFSF8/GPNMB/CD40LG/CTLA4/FCGR2B/PTPN6/FLT3/IRF1/EBI3/HLA-E/CD28/BTN2A2/TNFRSF14/SYK/TNFSF14/IKZF3/AIF1/GPR183/ANXA1/CD300A/JAK3/FYN/IL10/CR2/TNFRSF4/TYROBP/BTN3A1/ATM/HLA-DMB/LGALS3/LST1/RAC2/IL12B/PDCD1L…	82
BP	GO:0002253	activation of immune response	92/982	375/18723	6.73834e-37	1.627e-34	1.13036e-34	PTPRC/CD247/PRKCB/LAX1/ITK/ZAP70/SH2D1A/MS4A1/NCKAP1L/CD79B/LPXN/CD3E/TLR4/TRAT1/PYHIN1/LCK/PDE4B/CCR7/PLCG2/BTK/LCP2/CD226/LILRB4/UBASH3A/CMKLR1/STAP1/KLRD1/LAPTM5/KCNN4/ZBP1/CD22/NCR3/CR1/FGR/PLCL2/INPP5D/BCL10/BLNK/CFP/C1QA/BANK1/CTLA4/FCGR2B/PRKCH/FPR3/PTPN6/C1S/PIK3CD/PVRIG/C1QB/LIMK1/CD28/FCER1G/BTN2A2/BTN3A3/SERPING1/SYK/HCK/GBP1/CD300A/A2M/C5AR1/PHB/FYN/CR2/TXK/TYROBP/BTN3A1/C1R/FPR1/C3/L…	92
BP	GO:0002274	myeloid leukocyte activation	71/982	223/18723	1.29952e-36	3.00133e-34	2.08519e-34	PTPRC/SLAMF1/DOCK2/IRF4/CCL5/IL18RAP/CD2/RHOH/TLR4/PLCG2/BTK/LCP2/CD226/NR1H3/LILRB4/PTGDS/STAP1/PIK3CG/FGR/CD84/PTGDR/CCR2/IFNG/DNASE1L3/C1QA/FCGR2B/HMOX1/PIK3CD/TSPAN32/IL33/FCER1G/FOXF1/SYK/TLR1/CSF2/CST7/JAK2/CD200/AIF1/ANXA3/LAT/CD93/CD300A/C5AR1/IL10/SYT11/GPR137B/TYROBP/SNCA/RAC2/CX3CL1/PTAFR/IFNGR2/RASGRP1/ITGB2/CAMK4/SPI1/TRAF3IP2/TNF/APP/FER/RORA/CEBPA/CD33/VSIG4/IL13RA2/TLR6/CXCR2/FPR2…	71
BP	GO:0070663	regulation of leukocyte proliferation	74/982	245/18723	2.24774e-36	4.97501e-34	3.4564e-34	PTPRC/SLAMF1/CD6/PLA2G2D/TNFRSF1B/ZAP70/SASH3/CCL5/NCKAP1L/CD3E/LILRB1/TLR4/CORO1A/PRKCQ/CD1D/LILRB2/BTK/LILRB4/CD22/CR1/INPP5D/CCL19/CD86/CRTAM/CCR2/IL12RB1/TNFSF8/GPNMB/HHEX/CD40LG/CTLA4/FCGR2B/PTPN6/TNFAIP3/IRF1/EBI3/HLA-E/CD28/IL33/BTN2A2/TNFRSF14/SYK/IKZF3/AIF1/GPR183/ANXA1/CD300A/JAK3/CSF1R/IL10/TNFRSF4/TYROBP/ATM/HLA-DMB/LGALS3/LST1/RAC2/CCL8/IL12B/PDCD1LG2/MNDA/VCAM1/FOXP3/CD209/SFTPD/HLA…	74
BP	GO:0050670	regulation of lymphocyte proliferation	69/982	225/18723	1.93209e-34	4.1053e-32	2.85217e-32	PTPRC/SLAMF1/CD6/PLA2G2D/TNFRSF1B/ZAP70/SASH3/CCL5/NCKAP1L/CD3E/LILRB1/TLR4/CORO1A/PRKCQ/CD1D/LILRB2/BTK/LILRB4/CD22/CR1/INPP5D/CCL19/CD86/CRTAM/CCR2/IL12RB1/TNFSF8/GPNMB/CD40LG/CTLA4/FCGR2B/PTPN6/IRF1/EBI3/HLA-E/CD28/BTN2A2/TNFRSF14/SYK/IKZF3/AIF1/GPR183/ANXA1/CD300A/JAK3/IL10/TNFRSF4/TYROBP/ATM/HLA-DMB/LGALS3/LST1/RAC2/IL12B/PDCD1LG2/MNDA/VCAM1/FOXP3/CD209/SFTPD/HLA-DPB1/HLA-DPA1/SPN/IL2RA/VSIG…	69
BP	GO:0050867	positive regulation of cell activation	94/982	420/18723	3.27829e-34	6.69781e-32	4.65332e-32	PTPRC/SLAMF1/CD6/ZAP70/SASH3/CCL5/CD2/NCKAP1L/CD27/CD3E/LILRB1/RHOH/TLR4/LCK/CORO1A/PRKCQ/PLEK/CD1D/SIRPG/CCR7/LILRB2/BTK/CD226/LILRB4/STAP1/RUNX3/IL7R/CR1/CD4/FGR/CD5/INPP5D/CCL19/TBX21/CD86/BCL10/CCR2/IFNG/IL12RB1/ICOS/HLA-DOB/CD40LG/PTPN6/EBI3/HLA-E/CD28/IL33/TNFRSF14/B2M/SYK/TNFSF14/SIRPA/JAK2/CCL21/AIF1/GPR183/ANXA1/ADAM8/DPP4/JAK3/FYN/IL10/TNFRSF4/TYROBP/HLA-DMB/HLX/PTAFR/IL12B/PDCD1LG2/VAV…	94
BP	GO:0032944	regulation of mononuclear cell proliferation	69/982	227/18723	3.61718e-34	7.11647e-32	4.94419e-32	PTPRC/SLAMF1/CD6/PLA2G2D/TNFRSF1B/ZAP70/SASH3/CCL5/NCKAP1L/CD3E/LILRB1/TLR4/CORO1A/PRKCQ/CD1D/LILRB2/BTK/LILRB4/CD22/CR1/INPP5D/CCL19/CD86/CRTAM/CCR2/IL12RB1/TNFSF8/GPNMB/CD40LG/CTLA4/FCGR2B/PTPN6/IRF1/EBI3/HLA-E/CD28/BTN2A2/TNFRSF14/SYK/IKZF3/AIF1/GPR183/ANXA1/CD300A/JAK3/IL10/TNFRSF4/TYROBP/ATM/HLA-DMB/LGALS3/LST1/RAC2/IL12B/PDCD1LG2/MNDA/VCAM1/FOXP3/CD209/SFTPD/HLA-DPB1/HLA-DPA1/SPN/IL2RA/VSIG…	69
BP	GO:0002263	cell activation involved in immune response	76/982	279/18723	6.44057e-34	1.22187e-31	8.48896e-32	PTPRC/SLAMF1/LY9/DOCK2/IRF4/ITGAL/NCKAP1L/LILRB1/IRF8/TLR4/CD180/CORO1A/FGL2/PLCG2/MFNG/BTK/PTGDS/APBB1IP/ITM2A/PIK3CG/CR1/FGR/PLCL2/CD84/PTGDR/CCL19/TBX21/CD86/LCP1/CCR2/IFNG/DNASE1L3/IL12RB1/CD40LG/FCGR2B/HMOX1/PTK2B/PIK3CD/CD244/CD28/FCER1G/FOXF1/SYK/DOCK10/PARP3/ANXA3/GPR183/LAT/ANXA1/PTGER4/CD300A/JAK3/IL10/TYROBP/HLA-DMB/LGALS3/HLX/RAC2/PTAFR/IL12B/RASGRP1/FOXP3/ITGB2/SPI1/HLA-F/APP/FER/ROR…	76
BP	GO:0002696	positive regulation of leukocyte activation	92/982	409/18723	1.12349e-33	2.05793e-31	1.42975e-31	PTPRC/SLAMF1/CD6/ZAP70/SASH3/CCL5/CD2/NCKAP1L/CD27/CD3E/LILRB1/RHOH/TLR4/LCK/CORO1A/PRKCQ/CD1D/SIRPG/CCR7/LILRB2/BTK/CD226/LILRB4/STAP1/RUNX3/IL7R/CR1/CD4/FGR/CD5/INPP5D/CCL19/TBX21/CD86/BCL10/CCR2/IFNG/IL12RB1/ICOS/HLA-DOB/CD40LG/PTPN6/EBI3/HLA-E/CD28/IL33/TNFRSF14/B2M/SYK/TNFSF14/SIRPA/CCL21/AIF1/GPR183/ANXA1/ADAM8/DPP4/JAK3/FYN/IL10/TNFRSF4/TYROBP/HLA-DMB/HLX/PTAFR/IL12B/PDCD1LG2/VAV1/RASGRP1/…	92
BP	GO:0030217	T cell differentiation	72/982	257/18723	4.83275e-33	8.5572e-31	5.94514e-31	PTPRC/PLA2G2D/LY9/DOCK2/IRF4/ITK/ZAP70/SASH3/GPR18/CD2/NCKAP1L/CD27/CD3E/RHOH/CD3G/CD3D/LCK/CD1D/CCR7/FGL2/LILRB2/PRDM1/LILRB4/CD8A/RUNX3/BCL11B/IL7R/CR1/CD4/CCL19/TBX21/CD86/CRTAM/CCR2/LAG3/IFNG/IL12RB1/TNFSF8/CTLA4/MAFB/PIK3CD/IRF1/ZFP36L1/CD28/FCER1G/B2M/SYK/GPR183/ANXA1/PTGER4/ADAM8/JAK3/HLX/IL12B/VAV1/RASGRP1/HLA-DOA/FOXP3/CAMK4/SPI1/TRAF3IP2/RORA/CCR6/SPN/IL2RA/IL18R1/PTPN22/IL15/CD83/FUT7/…	72
BP	GO:0002366	leukocyte activation involved in immune response	74/982	275/18723	1.1636e-32	1.99389e-30	1.38526e-30	PTPRC/SLAMF1/LY9/DOCK2/IRF4/ITGAL/NCKAP1L/LILRB1/IRF8/TLR4/CD180/CORO1A/FGL2/PLCG2/MFNG/BTK/PTGDS/APBB1IP/ITM2A/PIK3CG/CR1/FGR/PLCL2/CD84/PTGDR/CCL19/TBX21/CD86/LCP1/CCR2/IFNG/DNASE1L3/IL12RB1/CD40LG/FCGR2B/HMOX1/PTK2B/PIK3CD/CD244/CD28/FCER1G/FOXF1/SYK/DOCK10/PARP3/ANXA3/GPR183/LAT/ANXA1/PTGER4/CD300A/JAK3/IL10/TYROBP/HLA-DMB/LGALS3/HLX/RAC2/PTAFR/IL12B/RASGRP1/FOXP3/ITGB2/SPI1/HLA-F/FER/RORA/CC…	74
BP	GO:0002703	regulation of leukocyte mediated immunity	67/982	226/18723	1.83792e-32	3.05094e-30	2.11965e-30	PTPRC/WAS/SLAMF1/TNFRSF1B/SASH3/SH2D1A/IL18RAP/NCKAP1L/LILRB1/TLR4/CD1D/PLCG2/BTK/CD226/LILRB4/STAP1/KLRD1/IL7R/NCR3/CR1/FGR/CD96/CD84/TBX21/CRTAM/CCR2/LAG3/ARRB2/LTA/DNASE1L3/IL12RB1/FCGR2B/HMOX1/PTPN6/HLA-E/CD28/FOXF1/B2M/SYK/PARP3/CD300A/JAK3/IL10/CR2/TYROBP/C3/SERPINB9/FCER2/RAC2/PTAFR/IL12B/VAV1/RASGRP1/FOXP3/ITGB2/SPI1/TNF/HLA-F/FER/NOD2/IL18R1/IL13RA2/IL27RA/C12orf4/FUT7/HLA-DRA/FBXO38	67
BP	GO:0042098	T cell proliferation	63/982	199/18723	1.98673e-32	3.19803e-30	2.22184e-30	PTPRC/SLAMF1/CD6/PLA2G2D/TNFRSF1B/DOCK2/ZAP70/SASH3/CCL5/NCKAP1L/CD3E/LILRB1/CORO1A/PRKCQ/CD1D/LILRB2/LILRB4/PIK3CG/CR1/CCL19/CD86/CRTAM/CCR2/IL12RB1/TNFSF8/GPNMB/CD40LG/CTLA4/PTPN6/IRF1/EBI3/HLA-E/CD28/BTN2A2/TNFRSF14/SYK/TNFSF14/AIF1/ANXA1/JAK3/FYN/IL10/TNFRSF4/BTN3A1/HLA-DMB/LGALS3/RAC2/IL12B/PDCD1LG2/RASGRP1/VCAM1/FOXP3/CD209/SFTPD/PSMB10/HLA-DPB1/HLA-DPA1/SPN/IL2RA/VSIG4/IL27RA/PTPN22/IL15	63
BP	GO:0030595	leukocyte chemotaxis	67/982	230/18723	6.03369e-32	9.42676e-30	6.54927e-30	IL16/SLAMF1/CCL5/GPR18/NCKAP1L/CORO1A/PDE4B/CCR7/CXCL13/CXCR3/PLA2G7/CMKLR1/S1PR1/STAP1/CXCR4/CXCR5/PIK3CG/SLAMF8/CCL4/CCL19/CXCL9/CCR2/CCR5/CCR1/PTK2B/PIK3CD/FCER1G/CXCL12/SYK/CXCL10/CCL21/AIF1/MPP1/GPR183/ANXA1/ADAM8/EDNRB/DPP4/HRH1/C5AR1/CSF1R/IL10/GPSM3/CCL18/LGALS3/C3AR1/RAC2/CX3CL1/CCL8/MMP28/VAV1/CXCL11/ITGB2/SPI1/RARRES2/TGFB2/SFTPD/CCR6/NOD2/BST1/CXCR2/FPR2/CCL11/CCL2/CCL17/CALCA/S100A8	67
BP	GO:0002768	immune response-regulating cell surface receptor signaling pathway	78/982	315/18723	1.13189e-31	1.71789e-29	1.19351e-29	PTPRC/CD247/PRKCB/LAX1/ITK/ZAP70/SH2D1A/MS4A1/NCKAP1L/CD79B/LPXN/CD3E/LILRB1/TRAT1/LCK/PDE4B/PRKCQ/CCR7/PLCG2/LILRB2/BTK/LCP2/CD226/LILRB4/UBASH3A/CMKLR1/STAP1/KLRD1/LAPTM5/KCNN4/CD22/NCR3/CR1/FGR/PLCL2/INPP5D/BCL10/BLNK/BANK1/CTLA4/FCGR2B/PRKCH/FPR3/PTPN6/PIK3CD/PVRIG/LIMK1/CD28/FCER1G/BTN2A2/BTN3A3/SYK/LILRA4/HCK/GBP1/CD300A/C5AR1/FYN/CR2/TXK/TYROBP/BTN3A1/FPR1/LGALS3/SKAP1/FCN1/C3AR1/VAV1/MNDA…	78
BP	GO:0060326	cell chemotaxis	77/982	310/18723	2.24809e-31	3.31719e-29	2.30462e-29	IL16/SLAMF1/MET/CXCR6/CCL5/GPR18/BIN2/NCKAP1L/CORO1A/PDE4B/PRKCQ/CCR7/CXCL13/CXCR3/PLA2G7/CMKLR1/S1PR1/STAP1/CXCR4/CXCR5/PIK3CG/SLAMF8/CCL4/CCL19/CXCL9/CCR2/CCR5/CCR1/ARRB2/EPHA2/PTK2B/PIK3CD/FCER1G/CXCL12/SYK/CXCL10/CCL21/AIF1/MPP1/NRP1/GPR183/ANXA1/ADAM8/EDNRB/DPP4/HRH1/C5AR1/CSF1R/IL10/GPSM3/CCL18/LGALS3/C3AR1/RAC2/CX3CL1/CCL8/MMP28/VAV1/VCAM1/CXCL11/ITGB2/SPI1/RARRES2/TGFB2/SFTPD/CCR6/NOD2/CC…	77
BP	GO:0002699	positive regulation of immune effector process	67/982	235/18723	2.56194e-31	3.67812e-29	2.55538e-29	PTPRC/SLAMF1/SASH3/SH2D1A/IL18RAP/LILRB1/TLR4/CD1D/PLCG2/BTK/CD226/STAP1/KLRD1/LAPTM5/NCR3/CR1/FGR/CD84/CCL19/TBX21/CD86/CRTAM/BCL10/CCR2/LAG3/IFNG/LTA/IL12RB1/HMOX1/CD244/HLA-E/CD28/TNFRSF14/FOXF1/B2M/SYK/CD36/ANXA1/CD300A/PHB/IL10/TNFRSF4/TYROBP/HLA-DMB/C3/HLX/FCER2/RAC2/PTAFR/IL12B/VAV1/RASGRP1/FOXP3/ITGB2/SPI1/TNF/HLA-F/FER/DNAJB9/NOD2/IL18R1/IL13RA2/PTPN22/C12orf4/PLA2G5/HLA-DRA/FBXO38	67
BP	GO:0002695	negative regulation of leukocyte activation	60/982	187/18723	2.68755e-31	3.75692e-29	2.61013e-29	PTPRC/LAX1/PLA2G2D/NCKAP1L/LILRB1/FGL2/LILRB2/BTK/NR1H3/LILRB4/RUNX3/SAMSN1/LAPTM5/CR1/FGR/CD84/INPP5D/TBX21/CD86/CRTAM/CCR2/LAG3/BANK1/GPNMB/CTLA4/FCGR2B/HMOX1/PTPN6/TNFAIP3/IRF1/TSPAN32/BTN2A2/TNFRSF14/FOXF1/CST7/PARP3/CD200/ANXA1/CD300A/JAK3/IL10/SYT11/TYROBP/ATM/LGALS3/HLX/LST1/CX3CL1/PDCD1LG2/MNDA/FOXP3/SPI1/HLA-F/SFTPD/FER/SPN/IL2RA/VSIG4/IL13RA2/PTPN22	60
BP	GO:0051251	positive regulation of lymphocyte activation	83/982	362/18723	4.53319e-31	6.17444e-29	4.28971e-29	PTPRC/SLAMF1/CD6/ZAP70/SASH3/CCL5/NCKAP1L/CD27/CD3E/LILRB1/RHOH/TLR4/LCK/CORO1A/PRKCQ/CD1D/SIRPG/CCR7/LILRB2/BTK/LILRB4/RUNX3/IL7R/CR1/CD4/CD5/INPP5D/CCL19/TBX21/CD86/BCL10/CCR2/IFNG/IL12RB1/ICOS/HLA-DOB/CD40LG/PTPN6/EBI3/HLA-E/CD28/TNFRSF14/B2M/SYK/TNFSF14/SIRPA/CCL21/AIF1/GPR183/ANXA1/ADAM8/DPP4/JAK3/FYN/IL10/TNFRSF4/TYROBP/HLA-DMB/HLX/IL12B/PDCD1LG2/VAV1/RASGRP1/VCAM1/HLA-DOA/FOXP3/CD209/HLA-F…	83
BP	GO:0050866	negative regulation of cell activation	63/982	210/18723	6.51835e-31	8.65637e-29	6.01404e-29	PTPRC/LAX1/PLA2G2D/NCKAP1L/LILRB1/FGL2/LILRB2/BTK/NR1H3/LILRB4/RUNX3/SAMSN1/LAPTM5/APOE/CR1/FGR/CD84/INPP5D/TBX21/CD86/CRTAM/CCR2/LAG3/BANK1/GPNMB/CTLA4/FCGR2B/HMOX1/PTPN6/TNFAIP3/IRF1/TSPAN32/BTN2A2/TNFRSF14/FOXF1/SH2B3/CST7/PARP3/CD200/ANXA1/CD300A/JAK3/IL10/SYT11/TYROBP/ATM/LGALS3/HLX/LST1/CX3CL1/PDCD1LG2/MNDA/FOXP3/SPI1/HLA-F/SFTPD/FER/SPN/IL2RA/VSIG4/IL13RA2/PTPN22/C1QTNF1	63
BP	GO:0032103	positive regulation of response to external stimulus	90/982	427/18723	1.14871e-30	1.48829e-28	1.03399e-28	IL16/SLAMF1/MET/CCL5/SH2D1A/IL18RAP/NCKAP1L/TLR4/PYHIN1/CD180/CD1D/CCR7/PLCG2/BTK/CXCL13/CD226/PLA2G7/CMKLR1/S1PR1/STAP1/KLRD1/CXCR4/TLR8/PIK3CG/ZBP1/ITGA2/NCR3/CCL4/CCL19/EREG/CRTAM/CCR2/LAG3/CCR1/IFNG/LTA/BMP6/PTK2B/TLR7/HLA-E/CD28/IL33/CXCL12/SYK/JAK2/CXCL10/CCL21/AIF1/HCK/NRP1/OSMR/LY86/PTGER4/ADAM8/C5AR1/CSF1R/FYN/GPSM3/TXK/TYROBP/SNCA/C3/FCN1/C3AR1/RAC2/CX3CL1/IL12B/ETS1/VAV1/MNDA/RASGRP1/S…	90
BP	GO:0097529	myeloid leukocyte migration	64/982	220/18723	1.60557e-30	2.03066e-28	1.41081e-28	SLAMF1/CCL5/PECAM1/NCKAP1L/RHOH/PDE4B/CCR7/CXCL13/PLA2G7/CMKLR1/STAP1/PIK3CG/SLAMF8/CCL4/CCL19/CXCL9/CCR2/CCR1/PTK2B/PIK3CD/FCER1G/CXCL12/SYK/SIRPA/CD200/CXCL10/CCL21/AIF1/MPP1/ANXA1/PTGER4/ADAM8/CD300A/EDNRB/DPP4/HRH1/C5AR1/CSF1R/CCL18/LGALS3/C3AR1/RAC2/CX3CL1/CCL8/MMP28/VAV1/CXCL11/ITGB2/SPI1/RARRES2/TGFB2/SFTPD/NOD2/BST1/RHOG/CXCR2/FPR2/CCL11/CCL2/IRAK4/FUT7/CCL17/CALCA/S100A8	64
BP	GO:0002237	response to molecule of bacterial origin	82/982	363/18723	3.21645e-30	3.97344e-28	2.76056e-28	IL10RA/CD6/TNFRSF1B/CCL5/CSF2RB/CARD8/LILRB1/IRF8/TLR4/CD180/PDE4B/CCR7/PLCG2/LILRB2/CXCL13/NR1H3/STAP1/GFI1/FASLG/CD96/CXCL9/CD86/BCL10/CCR5/CAPN2/KMO/LTA/BMP6/ACP5/IL18BP/FCGR2B/HPGD/TNFAIP3/IL24/CD14/B2M/TNIP3/TLR1/CSF2/SIRPA/JAK2/CXCL10/HCK/CASP1/MAPKAPK3/CD36/LY86/PTGER4/EDNRB/C5AR1/IL10/GNG12/SNCA/CX3CL1/PTAFR/IL12B/PDCD1LG2/VCAM1/ABCA1/CXCL11/FOXP3/SPI1/LY96/CLDN1/TNF/DCN/FER/IRF5/NOD2/LDO…	82
BP	GO:0002429	immune response-activating cell surface receptor signaling pathway	73/982	291/18723	4.37084e-30	5.15954e-28	3.5846e-28	PTPRC/CD247/PRKCB/LAX1/ITK/ZAP70/SH2D1A/MS4A1/NCKAP1L/CD79B/LPXN/CD3E/TRAT1/LCK/PDE4B/CCR7/PLCG2/BTK/LCP2/CD226/LILRB4/UBASH3A/CMKLR1/STAP1/KLRD1/LAPTM5/KCNN4/CD22/NCR3/CR1/FGR/PLCL2/INPP5D/BCL10/BLNK/BANK1/CTLA4/FCGR2B/PRKCH/FPR3/PTPN6/PIK3CD/PVRIG/LIMK1/CD28/FCER1G/BTN2A2/BTN3A3/SYK/HCK/GBP1/CD300A/C5AR1/FYN/CR2/TXK/TYROBP/BTN3A1/FPR1/LGALS3/SKAP1/FCN1/C3AR1/VAV1/MNDA/BTN3A2/FOXP3/HLA-DPB1/CSK/…	73
BP	GO:0002757	immune response-activating signal transduction	73/982	291/18723	4.37084e-30	5.15954e-28	3.5846e-28	PTPRC/CD247/PRKCB/LAX1/ITK/ZAP70/SH2D1A/MS4A1/NCKAP1L/CD79B/LPXN/CD3E/TRAT1/LCK/PDE4B/CCR7/PLCG2/BTK/LCP2/CD226/LILRB4/UBASH3A/CMKLR1/STAP1/KLRD1/LAPTM5/KCNN4/CD22/NCR3/CR1/FGR/PLCL2/INPP5D/BCL10/BLNK/BANK1/CTLA4/FCGR2B/PRKCH/FPR3/PTPN6/PIK3CD/PVRIG/LIMK1/CD28/FCER1G/BTN2A2/BTN3A3/SYK/HCK/GBP1/CD300A/C5AR1/FYN/CR2/TXK/TYROBP/BTN3A1/FPR1/LGALS3/SKAP1/FCN1/C3AR1/VAV1/MNDA/BTN3A2/FOXP3/HLA-DPB1/CSK/…	73
BP	GO:0002460	adaptive immune response based on somatic recombination of immune receptors built from immunoglobulin superfamily domains	80/982	356/18723	2.46378e-29	2.84513e-27	1.97667e-27	PTPRC/WAS/SLAMF1/LY9/TNFRSF1B/IRF4/SASH3/NCKAP1L/CD27/LILRB1/TLR4/PRKCQ/PRF1/CD1D/BTK/CXCL13/CD226/LILRB4/CD8A/KLRD1/TLR8/IL7R/CR1/CD4/INPP5D/CCL19/TBX21/BCL10/CCR2/LTA/C1QA/IL12RB1/HLA-DOB/CD40LG/IL18BP/FCGR2B/PTPN6/C1S/TNFAIP3/C1QB/EBI3/HLA-E/CD28/FCER1G/BTN3A3/SERPING1/B2M/PARP3/ANXA1/JAK3/PHB/IL10/CR2/C1R/HLA-DMB/C3/HLX/FCER2/IL12B/C7/BTN3A2/HLA-DOA/FOXP3/TRAF3IP2/TNF/HLA-F/HLA-DPB1/RORA/HLA-…	80
BP	GO:0071674	mononuclear cell migration	59/982	196/18723	4.18722e-29	4.73245e-27	3.28788e-27	SLAMF1/ZAP70/ITGAL/CCL5/PECAM1/CCR7/CXCL13/CXCR3/PLA2G7/ITGB7/CMKLR1/S1PR1/CXCR4/PIK3CG/SLAMF8/CCL4/CCL19/TBX21/STK10/CRTAM/CCR2/CCR5/CCR1/PTK2B/PIK3CD/TNFRSF14/CXCL12/JAM2/ITGA4/SIRPA/CD200/CXCL10/CCL21/AIF1/GPR183/ANXA1/ADAM8/C5AR1/CSF1R/CCL18/LGALS3/C3AR1/CX3CL1/CCL8/CXCL11/SPI1/RARRES2/TNF/APP/CCR6/SPN/IL27RA/CXCR2/FPR2/CCL11/CCL2/FUT7/CCL17/CALCA	59
BP	GO:0002831	regulation of response to biotic stimulus	76/982	327/18723	6.30528e-29	6.97784e-27	4.84788e-27	NCF1/CCL5/SH2D1A/IL18RAP/CARD8/LILRB1/TLR4/PYHIN1/CD180/CD1D/FGL2/PLCG2/CD226/NR1H3/KLRD1/TLR8/ZBP1/APOE/NCR3/CR1/FGR/CD96/SLAMF8/EREG/SAMHD1/CRTAM/LAG3/ARRB2/BMP6/IL12RB1/APOBEC3G/FCGR2B/PTPN6/TNFAIP3/IRF1/TSPAN32/HLA-E/SERPING1/SYK/SEC14L1/HCK/CD36/LY86/ADAM8/A2M/FYN/STAT1/SYT11/TXK/TYROBP/FCN1/SERPINB9/CX3CL1/IL12B/TRAF3/VAV1/PTPN1/MNDA/RNF125/RASGRP1/FOXP3/SPI1/LY96/TRAF3IP2/HLA-F/OPTN/MUL1/V…	76
BP	GO:0042129	regulation of T cell proliferation	55/982	171/18723	7.6932e-29	8.34006e-27	5.79428e-27	PTPRC/SLAMF1/CD6/PLA2G2D/TNFRSF1B/ZAP70/SASH3/CCL5/NCKAP1L/CD3E/LILRB1/CORO1A/PRKCQ/CD1D/LILRB2/LILRB4/CR1/CCL19/CD86/CRTAM/CCR2/IL12RB1/TNFSF8/GPNMB/CD40LG/CTLA4/PTPN6/IRF1/EBI3/HLA-E/CD28/BTN2A2/TNFRSF14/SYK/AIF1/ANXA1/JAK3/IL10/HLA-DMB/LGALS3/RAC2/IL12B/PDCD1LG2/VCAM1/FOXP3/CD209/SFTPD/HLA-DPB1/HLA-DPA1/SPN/IL2RA/VSIG4/IL27RA/PTPN22/IL15	55
BP	GO:0032496	response to lipopolysaccharide	77/982	343/18723	3.10969e-28	3.30373e-26	2.29528e-26	IL10RA/CD6/TNFRSF1B/CCL5/CSF2RB/CARD8/LILRB1/IRF8/TLR4/CD180/PDE4B/CCR7/PLCG2/LILRB2/CXCL13/NR1H3/STAP1/GFI1/FASLG/CD96/CXCL9/CD86/BCL10/CCR5/CAPN2/KMO/LTA/BMP6/ACP5/IL18BP/HPGD/TNFAIP3/IL24/CD14/TNIP3/CSF2/SIRPA/JAK2/CXCL10/HCK/CASP1/MAPKAPK3/CD36/LY86/PTGER4/EDNRB/C5AR1/IL10/GNG12/SNCA/CX3CL1/PTAFR/IL12B/PDCD1LG2/VCAM1/ABCA1/CXCL11/FOXP3/SPI1/LY96/CLDN1/TNF/DCN/FER/NOD2/LDOC1/RPS6KA3/HSF1/CPS1/…	77
BP	GO:0002698	negative regulation of immune effector process	44/982	110/18723	7.27353e-28	7.57588e-26	5.26336e-26	PTPRC/SLAMF1/NCKAP1L/LILRB1/FGL2/LILRB4/KLRD1/CD22/IL7R/CR1/CD96/SLAMF8/CD84/TBX21/CCR2/ARRB2/FCGR2B/HMOX1/PTPN6/HLA-E/SERPING1/FOXF1/PARP3/ANXA1/CD300A/A2M/JAK3/IL10/CR2/LGALS3/CD59/HLX/SERPINB9/FOXP3/SPI1/TNF/HLA-F/TGFB2/FER/VSIG4/NOD2/IL13RA2/IRAK3/ANGPT1	44
BP	GO:0002449	lymphocyte mediated immunity	77/982	350/18723	1.27192e-27	1.29932e-25	9.02706e-26	PTPRC/WAS/SLAMF1/TNFRSF1B/SASH3/SH2D1A/IL18RAP/NCKAP1L/CD27/LILRB1/CORO1A/PRF1/CD1D/GZMB/BTK/CD226/SLAMF7/LILRB4/CD8A/KLRD1/TLR8/IL7R/NCR3/CR1/CD96/INPP5D/TBX21/CRTAM/BCL10/CCR2/LAG3/ARRB2/LTA/C1QA/IL12RB1/HLA-DOB/CD40LG/FCGR2B/PTPN6/C1S/C1QB/HLA-E/CD28/FCER1G/BTN3A3/SERPING1/B2M/PARP3/IL10/CR2/C1R/HLA-DMB/C3/SERPINB9/FCER2/IL12B/C7/VAV1/RASGRP1/BTN3A2/HLA-DOA/FOXP3/TRAF3IP2/TNF/HLA-F/HLA-DPB1/HL…	77
BP	GO:0002685	regulation of leukocyte migration	59/982	210/18723	2.51256e-27	2.51824e-25	1.74956e-25	SLAMF1/CCL5/GPR18/NCKAP1L/RHOH/CCR7/CXCL13/CXCR3/PLA2G7/CMKLR1/STAP1/ITGA2/SLAMF8/CCL4/CCL19/STK10/CCR2/CCR1/HMOX1/PTK2B/TNFRSF14/CXCL12/JAM2/ITGA4/CD200/CXCL10/CCL21/AIF1/MPP1/ADORA1/ANXA1/PTGER4/ADAM8/CD300A/DPP4/C5AR1/CSF1R/GPSM3/LGALS3/C3AR1/RAC2/CX3CL1/CCL8/MMP28/PTAFR/SPI1/RARRES2/TNF/APP/CCR6/SPN/NOD2/BST1/IL27RA/RHOG/CXCR2/FPR2/CCL2/FUT7	59
BP	GO:0050727	regulation of inflammatory response	80/982	386/18723	8.07408e-27	7.9425e-25	5.51807e-25	NT5E/PTPRC/NCF1/IL16/PLA2G2D/TNFRSF1B/AOAH/CCL5/TLR4/CCR7/PLCG2/BTK/NR1H3/PLA2G7/STAP1/PIK3CG/ZBP1/APOE/ITGA2/FGR/SLAMF8/CCR2/IFNG/LTA/DNASE1L3/ACP5/CALCRL/FCGR2B/CYLD/TNFAIP3/TLR7/HLA-E/CD28/IL33/TEK/FOXF1/SYK/CST7/SIRPA/JAK2/CD200/HCK/CASP1/PTGIS/OSMR/ADORA1/ANXA1/PTGER4/ADAM8/EDNRB/FYN/IL10/SYT11/GPSM3/SNCA/C3/CX3CL1/IL12B/ETS1/MGLL/MEFV/FOXP3/SHARPIN/TNF/APP/NLRP1/FABP4/RORA/CEBPA/IL2RA/IL17R…	80
BP	GO:0050777	negative regulation of immune response	56/982	194/18723	1.19269e-26	1.15192e-24	8.00301e-25	PTPRC/SLAMF1/NCKAP1L/LILRB1/FGL2/NR1H3/LILRB4/KLRD1/SAMSN1/IL7R/CR1/FGR/CD96/SLAMF8/CD84/INPP5D/TBX21/SAMHD1/CCR2/ARRB2/CTLA4/FCGR2B/HMOX1/PTPN6/TNFAIP3/HLA-E/TNFRSF14/SERPING1/FOXF1/SYK/SEC14L1/PARP3/HCK/ANXA1/CD300A/A2M/JAK3/FYN/IL10/CR2/LGALS3/CD59/HLX/SERPINB9/IL12B/RNF125/FOXP3/SPI1/HLA-F/FER/MUL1/VSIG4/NOD2/IL13RA2/IL27RA/IRAK3	56
BP	GO:0097530	granulocyte migration	49/982	148/18723	1.80816e-26	1.71517e-24	1.19162e-24	SLAMF1/CCL5/PECAM1/NCKAP1L/RHOH/PDE4B/CCR7/CXCL13/CMKLR1/PIK3CG/SLAMF8/CCL4/CCL19/CXCL9/PIK3CD/FCER1G/SYK/CXCL10/CCL21/MPP1/ANXA1/PTGER4/ADAM8/CD300A/DPP4/HRH1/C5AR1/CSF1R/CCL18/LGALS3/C3AR1/RAC2/CX3CL1/CCL8/VAV1/CXCL11/ITGB2/RARRES2/TGFB2/NOD2/BST1/RHOG/CXCR2/CCL11/CCL2/IRAK4/FUT7/CCL17/S100A8	49
BP	GO:1902105	regulation of leukocyte differentiation	66/982	279/18723	1.0331e-25	9.62778e-24	6.68893e-24	PTPRC/EVI2B/IRF4/ZAP70/SASH3/CD2/HCLS1/NCKAP1L/CD27/LILRB1/RHOH/TLR4/FGL2/LILRB2/BTK/PRDM1/LILRB4/RASSF2/RUNX3/LILRB3/IL7R/CR1/CD4/SLAMF8/INPP5D/CCL19/TBX21/CD86/CRTAM/CCR2/LAG3/CCR1/IFNG/IL12RB1/CTLA4/FCGR2B/MAFB/PTPN6/TMEM176B/IRF1/ZFP36L1/CD28/SYK/IKZF3/ANXA1/ADAM8/JAK3/IL10/GPR137B/TYROBP/HLX/IL12B/RASGRP1/HLA-DOA/FOXP3/CAMK4/TNF/IL2RA/HSF1/IL15RA/IL15/CD83/HLA-DRA/CLDN18/RB1/SOX4	66
BP	GO:1903706	regulation of hemopoiesis	76/982	367/18723	1.69569e-25	1.55302e-23	1.07897e-23	PTPRC/EVI2B/IRF4/ZAP70/SASH3/CD2/HCLS1/NCKAP1L/CD27/LILRB1/RHOH/TLR4/GPR171/FGL2/LILRB2/BTK/PRDM1/LILRB4/RASSF2/RUNX3/LILRB3/IL7R/CR1/CD4/SLAMF8/INPP5D/CCL19/TBX21/CD86/CRTAM/CCR2/LAG3/CCR1/IFNG/IL12RB1/CTLA4/FCGR2B/MAFB/PTPN6/PTK2B/TMEM176B/IRF1/ZFP36L1/CD28/B2M/SYK/IKZF3/ANXA1/ADAM8/JAK3/STAT1/IL10/GPR137B/TYROBP/HLX/IL12B/ETS1/RASGRP1/HLA-DOA/FOXP3/CAMK4/SPI1/TNF/IL2RA/HSF1/JAG1/IL15RA/IL15/ME…	76
BP	GO:0046631	alpha-beta T cell activation	47/982	156/18723	1.92742e-23	1.73533e-21	1.20563e-21	PTPRC/PLA2G2D/LY9/DOCK2/IRF4/ITK/ZAP70/SASH3/GPR18/NCKAP1L/CD3E/LILRB1/PRKCQ/PRDM1/LILRB4/RUNX3/BCL11B/CCL19/TBX21/CD86/CRTAM/CCR2/IFNG/IL12RB1/TNFSF8/IRF1/EBI3/HLA-E/CD28/TNFRSF14/SYK/GPR183/ANXA1/PTGER4/CD300A/JAK3/HLX/IL12B/FOXP3/RORA/SPN/IL18R1/PTPN22/IL15/CD83/FUT7/HLA-DRA	47
BP	GO:0032609	interferon-gamma production	40/982	112/18723	2.99435e-23	2.60754e-21	1.8116e-21	SLAMF1/SASH3/CD2/CD3E/LILRB1/IRF8/TLR4/PDE4B/CCR7/CD226/LILRB4/TLR8/LAPTM5/CR1/CD96/CRTAM/CCR2/LTA/IL12RB1/CD244/TLR7/EBI3/CD14/SIRPA/IL10/TXK/BTN3A1/IL12B/PDCD1LG2/RASGRP1/BTN3A2/FOXP3/TNF/HLA-DPB1/HLA-DPA1/NOD2/IL18R1/IL27RA/PTPN22/PDE4D	40
BP	GO:0032649	regulation of interferon-gamma production	40/982	112/18723	2.99435e-23	2.60754e-21	1.8116e-21	SLAMF1/SASH3/CD2/CD3E/LILRB1/IRF8/TLR4/PDE4B/CCR7/CD226/LILRB4/TLR8/LAPTM5/CR1/CD96/CRTAM/CCR2/LTA/IL12RB1/CD244/TLR7/EBI3/CD14/SIRPA/IL10/TXK/BTN3A1/IL12B/PDCD1LG2/RASGRP1/BTN3A2/FOXP3/TNF/HLA-DPB1/HLA-DPA1/NOD2/IL18R1/IL27RA/PTPN22/PDE4D	40
BP	GO:0045619	regulation of lymphocyte differentiation	49/982	174/18723	6.08113e-23	5.21016e-21	3.61977e-21	PTPRC/IRF4/ZAP70/SASH3/CD2/NCKAP1L/CD27/RHOH/FGL2/LILRB2/BTK/PRDM1/LILRB4/RUNX3/IL7R/CR1/SLAMF8/INPP5D/CCL19/TBX21/CD86/CRTAM/CCR2/LAG3/IFNG/IL12RB1/CTLA4/PTPN6/IRF1/ZFP36L1/CD28/SYK/IKZF3/ANXA1/ADAM8/JAK3/IL10/HLX/IL12B/RASGRP1/HLA-DOA/FOXP3/CAMK4/IL2RA/IL15RA/IL15/CD83/HLA-DRA/SOX4	49
BP	GO:0002706	regulation of lymphocyte mediated immunity	48/982	168/18723	8.4523e-23	7.12676e-21	4.95134e-21	PTPRC/WAS/SLAMF1/TNFRSF1B/SASH3/SH2D1A/IL18RAP/NCKAP1L/LILRB1/CD1D/BTK/CD226/LILRB4/KLRD1/IL7R/NCR3/CR1/CD96/TBX21/CRTAM/CCR2/LAG3/ARRB2/LTA/IL12RB1/FCGR2B/PTPN6/HLA-E/CD28/B2M/PARP3/IL10/CR2/C3/SERPINB9/FCER2/IL12B/VAV1/RASGRP1/FOXP3/TNF/HLA-F/NOD2/IL18R1/IL27RA/FUT7/HLA-DRA/FBXO38	48
BP	GO:0071219	cellular response to molecule of bacterial origin	55/982	221/18723	9.5616e-23	7.93613e-21	5.51365e-21	CD6/TNFRSF1B/CCL5/CARD8/LILRB1/IRF8/TLR4/CD180/PDE4B/PLCG2/LILRB2/CXCL13/NR1H3/STAP1/GFI1/CXCL9/CD86/BCL10/CCR5/CAPN2/KMO/BMP6/FCGR2B/TNFAIP3/IL24/CD14/TNIP3/TLR1/CSF2/SIRPA/CXCL10/HCK/CASP1/CD36/LY86/EDNRB/IL10/CX3CL1/PTAFR/IL12B/PDCD1LG2/ABCA1/CXCL11/SPI1/LY96/TNF/NOD2/LDOC1/HSF1/TLR6/PPARGC1A/PTPN22/CCL2/LITAF/TFPI	55
BP	GO:0002819	regulation of adaptive immune response	50/982	183/18723	9.72489e-23	7.94748e-21	5.52154e-21	PTPRC/WAS/CD48/SLAMF1/TNFRSF1B/SASH3/NCKAP1L/LILRB1/PRKCQ/CD1D/BTK/CD226/LILRB4/KLRD1/SAMSN1/IL7R/CR1/CD4/CCL19/TBX21/CCR2/LTA/IL12RB1/FCGR2B/PTPN6/TNFAIP3/IRF1/HLA-E/CD28/TNFRSF14/B2M/PARP3/ANXA1/JAK3/IL10/CR2/C3/SKAP1/HLX/FCER2/IL12B/FOXP3/TNF/HLA-F/NOD2/IL18R1/IL27RA/FUT7/HLA-DRA/FBXO38	50
BP	GO:1990266	neutrophil migration	41/982	122/18723	1.23646e-22	9.95166e-21	6.91394e-21	CCL5/PECAM1/NCKAP1L/RHOH/PDE4B/CCR7/CXCL13/PIK3CG/SLAMF8/CCL4/CCL19/CXCL9/PIK3CD/FCER1G/SYK/CXCL10/CCL21/MPP1/ADAM8/DPP4/C5AR1/CCL18/LGALS3/C3AR1/RAC2/CX3CL1/CCL8/VAV1/CXCL11/ITGB2/TGFB2/NOD2/BST1/RHOG/CXCR2/CCL11/CCL2/IRAK4/FUT7/CCL17/S100A8	41
BP	GO:0051250	negative regulation of lymphocyte activation	46/982	157/18723	2.09533e-22	1.65648e-20	1.15084e-20	LAX1/PLA2G2D/NCKAP1L/LILRB1/FGL2/LILRB2/BTK/LILRB4/RUNX3/SAMSN1/LAPTM5/CR1/FGR/INPP5D/TBX21/CD86/CRTAM/LAG3/BANK1/GPNMB/CTLA4/FCGR2B/PTPN6/TNFAIP3/IRF1/BTN2A2/TNFRSF14/PARP3/ANXA1/CD300A/JAK3/IL10/TYROBP/ATM/LGALS3/HLX/LST1/PDCD1LG2/MNDA/FOXP3/HLA-F/SFTPD/SPN/IL2RA/VSIG4/PTPN22	46
BP	GO:0071706	tumor necrosis factor superfamily cytokine production	50/982	186/18723	2.15167e-22	1.65648e-20	1.15084e-20	PTPRC/SLAMF1/SASH3/GPR18/CD2/LILRB1/TLR4/PLCG2/CD84/CYBB/CCL19/CD86/BCL10/CCR2/ARRB2/IFNG/ACP5/GPNMB/PTPN6/UBE2J1/TNFAIP3/HLA-E/IL33/CD14/TNFRSF8/SYK/TLR1/SIRPA/LILRA4/JAK2/CD36/ADAM8/IL10/SYT11/TYROBP/CX3CL1/PTAFR/IL12B/RASGRP1/FOXP3/LY96/APP/SPN/CD33/CD34/NOD2/IL27RA/PTPN22/IRAK3/ANGPT1	50
BP	GO:1903555	regulation of tumor necrosis factor superfamily cytokine production	50/982	186/18723	2.15167e-22	1.65648e-20	1.15084e-20	PTPRC/SLAMF1/SASH3/GPR18/CD2/LILRB1/TLR4/PLCG2/CD84/CYBB/CCL19/CD86/BCL10/CCR2/ARRB2/IFNG/ACP5/GPNMB/PTPN6/UBE2J1/TNFAIP3/HLA-E/IL33/CD14/TNFRSF8/SYK/TLR1/SIRPA/LILRA4/JAK2/CD36/ADAM8/IL10/SYT11/TYROBP/CX3CL1/PTAFR/IL12B/RASGRP1/FOXP3/LY96/APP/SPN/CD33/CD34/NOD2/IL27RA/PTPN22/IRAK3/ANGPT1	50
BP	GO:0045088	regulation of innate immune response	54/982	218/18723	2.99332e-22	2.2715e-20	1.57813e-20	NCF1/CCL5/SH2D1A/IL18RAP/LILRB1/TLR4/PYHIN1/CD1D/PLCG2/CD226/NR1H3/KLRD1/TLR8/ZBP1/APOE/NCR3/CR1/FGR/CD96/SLAMF8/EREG/SAMHD1/CRTAM/LAG3/ARRB2/FCGR2B/PTPN6/TNFAIP3/IRF1/HLA-E/SERPING1/SYK/HCK/ADAM8/A2M/FYN/TXK/TYROBP/FCN1/SERPINB9/IL12B/VAV1/PTPN1/MNDA/RASGRP1/SPI1/HLA-F/MUL1/VSIG4/NOD2/FPR2/PTPN22/IRAK3/PLA2G5	54
BP	GO:0001818	negative regulation of cytokine production	70/982	357/18723	4.04485e-22	3.02623e-20	2.10248e-20	PTPRC/SLAMF1/GPR18/NCKAP1L/CARD8/LILRB1/TLR4/CCR7/BTK/LILRB4/CMKLR1/TLR8/LAPTM5/CR1/CD96/CD84/INPP5D/ABCD2/TBX21/LAG3/ARRB2/IFNG/ACP5/BANK1/EPHA2/GPNMB/FCGR2B/HMOX1/PTPN6/CYLD/TNFAIP3/BTN2A2/SRGN/SIRPA/LILRA4/CD200/ANXA1/GBP1/PTGER4/JAK3/IL10/SYT11/TYROBP/CDH3/CX3CL1/IL12B/PDCD1LG2/RNF125/MEFV/FOXP3/KLF2/TNF/HLA-F/TGFB2/SFTPD/MUL1/CSK/SERPINB1/CD33/VSIG4/CD34/NOD2/IL27RA/TLR6/PTPN22/NPTN/CD83/IRA…	70
BP	GO:0031349	positive regulation of defense response	61/982	278/18723	4.99441e-22	3.68476e-20	2.56e-20	IL16/CCL5/SH2D1A/IL18RAP/TLR4/PYHIN1/CD1D/CCR7/PLCG2/BTK/CD226/PLA2G7/STAP1/KLRD1/TLR8/PIK3CG/ZBP1/ITGA2/NCR3/EREG/CRTAM/CCR2/LAG3/IFNG/LTA/TLR7/HLA-E/CD28/IL33/SYK/JAK2/HCK/OSMR/PTGER4/ADAM8/FYN/GPSM3/TXK/TYROBP/SNCA/C3/FCN1/CX3CL1/IL12B/ETS1/VAV1/MNDA/RASGRP1/SPI1/TNF/HLA-F/OPTN/APP/FABP4/CEBPA/IL17RA/NOD2/FPR2/IL15/PLA2G5/S100A8	61
BP	GO:0071216	cellular response to biotic stimulus	57/982	246/18723	6.97459e-22	5.07521e-20	3.52602e-20	CD6/TNFRSF1B/CCL5/CARD8/LILRB1/IRF8/TLR4/CD180/PDE4B/PLCG2/LILRB2/BTK/CXCL13/NR1H3/STAP1/GFI1/CXCL9/CD86/BCL10/CCR5/CAPN2/KMO/BMP6/FCGR2B/TNFAIP3/IL24/CD14/TNIP3/SYK/TLR1/CSF2/SIRPA/CXCL10/HCK/CASP1/CD36/LY86/EDNRB/IL10/CX3CL1/PTAFR/IL12B/PDCD1LG2/ABCA1/CXCL11/SPI1/LY96/TNF/NOD2/LDOC1/HSF1/TLR6/PPARGC1A/PTPN22/CCL2/LITAF/TFPI	57
BP	GO:0006909	phagocytosis	64/982	308/18723	1.03243e-21	7.41116e-20	5.14893e-20	ARHGAP25/PTPRC/SLAMF1/MET/DOCK2/ITGAL/IL2RG/BIN2/PECAM1/NCKAP1L/RHOH/IRF8/TLR4/CORO1A/IL2RB/SIRPG/PLCG2/NR1H3/STAP1/ICAM3/ITGA2/FGR/CCR2/IFNG/FCGR2B/NCF4/LIMK1/FCER1G/CD14/SYK/SIRPA/AIF1/HCK/CD36/ANXA3/ADORA1/ANXA1/CD93/CD300A/FYN/SYT11/TYROBP/C3/FCN1/RAC2/VAV1/ABCA1/ITGB2/TNF/SFTPD/CSK/NOD2/MSR1/RHOG/FPR2/LRP1/IL15RA/IL15/CCL2/GSN/FCGR1A/PLA2G5/SH3BP1/EIF2AK1	64
BP	GO:0050851	antigen receptor-mediated signaling pathway	56/982	240/18723	1.12333e-21	7.95614e-20	5.52755e-20	PTPRC/CD247/PRKCB/LAX1/ITK/ZAP70/SH2D1A/MS4A1/NCKAP1L/CD79B/LPXN/CD3E/TRAT1/LCK/PDE4B/CCR7/PLCG2/BTK/LCP2/CD226/LILRB4/UBASH3A/STAP1/LAPTM5/KCNN4/CD22/PLCL2/INPP5D/BCL10/BLNK/BANK1/CTLA4/FCGR2B/PRKCH/PTPN6/PIK3CD/PVRIG/CD28/BTN2A2/BTN3A3/SYK/GBP1/CD300A/FYN/TXK/BTN3A1/LGALS3/SKAP1/MNDA/BTN3A2/FOXP3/HLA-DPB1/CSK/BTN2A1/PTPN22/PDE4D	56
BP	GO:0071222	cellular response to lipopolysaccharide	52/982	209/18723	1.45006e-21	1.01351e-19	7.04141e-20	CD6/TNFRSF1B/CCL5/CARD8/LILRB1/IRF8/TLR4/CD180/PDE4B/PLCG2/LILRB2/CXCL13/NR1H3/STAP1/GFI1/CXCL9/CD86/BCL10/CCR5/CAPN2/KMO/BMP6/TNFAIP3/IL24/CD14/TNIP3/CSF2/SIRPA/CXCL10/HCK/CASP1/CD36/LY86/EDNRB/IL10/CX3CL1/PTAFR/IL12B/PDCD1LG2/ABCA1/CXCL11/SPI1/LY96/TNF/NOD2/LDOC1/HSF1/PPARGC1A/PTPN22/CCL2/LITAF/TFPI	52
BP	GO:0050852	T cell receptor signaling pathway	40/982	123/18723	1.64007e-21	1.13144e-19	7.86068e-20	PTPRC/CD247/ITK/ZAP70/SH2D1A/CD3E/TRAT1/LCK/PDE4B/CCR7/PLCG2/LCP2/CD226/LILRB4/UBASH3A/LAPTM5/KCNN4/INPP5D/BCL10/CTLA4/PTPN6/PIK3CD/PVRIG/CD28/BTN2A2/BTN3A3/GBP1/CD300A/FYN/TXK/BTN3A1/LGALS3/SKAP1/BTN3A2/FOXP3/HLA-DPB1/CSK/BTN2A1/PTPN22/PDE4D	40
BP	GO:0072676	lymphocyte migration	39/982	117/18723	1.90308e-21	1.29605e-19	9.00433e-20	ZAP70/ITGAL/CCL5/CCR7/CXCL13/CXCR3/ITGB7/S1PR1/PIK3CG/CCL4/CCL19/TBX21/STK10/CRTAM/CCR2/PTK2B/PIK3CD/TNFRSF14/CXCL12/JAM2/ITGA4/CD200/CXCL10/CCL21/AIF1/GPR183/ADAM8/CCL18/CX3CL1/CCL8/CXCL11/APP/CCR6/SPN/IL27RA/CCL11/CCL2/FUT7/CCL17	39
BP	GO:0071621	granulocyte chemotaxis	40/982	125/18723	3.21822e-21	2.16395e-19	1.50341e-19	SLAMF1/CCL5/NCKAP1L/PDE4B/CCR7/CXCL13/CMKLR1/PIK3CG/CCL4/CCL19/CXCL9/PIK3CD/FCER1G/SYK/CXCL10/CCL21/MPP1/ANXA1/DPP4/HRH1/C5AR1/CSF1R/CCL18/LGALS3/C3AR1/RAC2/CX3CL1/CCL8/VAV1/CXCL11/ITGB2/RARRES2/TGFB2/NOD2/BST1/CXCR2/CCL11/CCL2/CCL17/S100A8	40
BP	GO:0042113	B cell activation	66/982	334/18723	4.17164e-21	2.76997e-19	1.92444e-19	PTPRC/PRKCB/LAX1/ZAP70/SASH3/MS4A1/NCKAP1L/CD79B/CD27/IRF8/TLR4/CD180/PLCG2/MFNG/BTK/ITM2A/CXCR5/SAMSN1/LAPTM5/CD22/IL7R/CR1/PLCL2/SLAMF8/INPP5D/TBX21/CD86/BLNK/BANK1/HHEX/CD40LG/CTLA4/FCGR2B/PTPN6/PTK2B/PIK3CD/TNFAIP3/FLT3/ZFP36L1/CD28/SYK/DOCK10/ITGA4/IKZF3/PARP3/GPR183/CD300A/JAK3/PHB/IL10/CR2/TNFRSF4/TYROBP/ATM/LYL1/MNDA/RASGRP1/VCAM1/FOXP3/SPI1/TRAF3IP2/CCR6/DNAJB9/NOD2/BST1/IL27RA	66
BP	GO:0042102	positive regulation of T cell proliferation	36/982	101/18723	5.05991e-21	3.3183e-19	2.3054e-19	PTPRC/SLAMF1/CD6/ZAP70/SASH3/CCL5/NCKAP1L/CD3E/CORO1A/PRKCQ/CD1D/LILRB2/CCL19/CD86/CCR2/IL12RB1/CD40LG/EBI3/HLA-E/CD28/SYK/AIF1/ANXA1/JAK3/HLA-DMB/IL12B/PDCD1LG2/VCAM1/FOXP3/CD209/HLA-DPB1/HLA-DPA1/IL2RA/IL27RA/PTPN22/IL15	36
BP	GO:0002285	lymphocyte activation involved in immune response	49/982	194/18723	1.07394e-20	6.95705e-19	4.83343e-19	PTPRC/LY9/IRF4/ITGAL/NCKAP1L/LILRB1/IRF8/TLR4/CD180/CORO1A/FGL2/PLCG2/MFNG/APBB1IP/ITM2A/CR1/PLCL2/CCL19/TBX21/CD86/LCP1/IFNG/IL12RB1/CD40LG/FCGR2B/PTK2B/CD244/CD28/FCER1G/DOCK10/PARP3/GPR183/ANXA1/PTGER4/JAK3/IL10/HLA-DMB/LGALS3/HLX/IL12B/FOXP3/SPI1/HLA-F/RORA/CCR6/SPN/IL18R1/IL27RA/HLA-DRA	49
BP	GO:0002700	regulation of production of molecular mediator of immune response	45/982	164/18723	1.13412e-20	7.25839e-19	5.04278e-19	PTPRC/SLAMF1/TNFRSF1B/SASH3/LILRB1/TLR4/PLCG2/BTK/CD226/LILRB4/LAPTM5/CD22/CR1/CD96/TBX21/CD86/BCL10/CCR2/CD40LG/FCGR2B/HMOX1/CD244/HLA-E/CD28/TNFRSF14/B2M/PARP3/CD36/JAK3/PHB/IL10/TNFRSF4/FOXP3/TNF/HLA-F/TGFB2/DNAJB9/NOD2/IL18R1/IL13RA2/TRIL/IL27RA/PTPN22/IRAK3/ANGPT1	45
BP	GO:0032102	negative regulation of response to external stimulus	74/982	420/18723	1.8761e-20	1.18641e-18	8.24263e-19	NT5E/PTPRC/TNFRSF1B/AOAH/GPR18/CARD8/LILRB1/FGL2/CXCL13/NR1H3/STAP1/KLRD1/APOE/CR1/FGR/CD96/SLAMF8/SEMA4D/SAMHD1/ARRB2/ACP5/CALCRL/FCGR2B/SEMA3C/TNFAIP3/HLA-E/TEK/SERPING1/FOXF1/PLAT/SH2B3/SYK/SEC14L1/ANXA2/CST7/SIRPA/CD200/AIF1/HCK/PTGIS/NRP1/ADORA1/PTGER4/A2M/DPP4/FYN/IL10/SYT11/PLAU/SERPINB9/CX3CL1/MMP28/IL12B/RNF125/MEFV/FOXP3/SHARPIN/FGA/TNF/HLA-F/RORA/MUL1/IL2RA/VSIG4/CD34/NOD2/FPR2/C1QTNF1…	74
BP	GO:0032640	tumor necrosis factor production	47/982	181/18723	1.92634e-20	1.18985e-18	8.26652e-19	PTPRC/SLAMF1/SASH3/GPR18/CD2/LILRB1/TLR4/PLCG2/CD84/CYBB/CCL19/CCR2/ARRB2/IFNG/ACP5/GPNMB/PTPN6/UBE2J1/TNFAIP3/HLA-E/IL33/CD14/TNFRSF8/SYK/TLR1/SIRPA/LILRA4/JAK2/CD36/IL10/SYT11/TYROBP/CX3CL1/PTAFR/IL12B/RASGRP1/FOXP3/LY96/APP/SPN/CD33/CD34/NOD2/IL27RA/PTPN22/IRAK3/ANGPT1	47
BP	GO:0032680	regulation of tumor necrosis factor production	47/982	181/18723	1.92634e-20	1.18985e-18	8.26652e-19	PTPRC/SLAMF1/SASH3/GPR18/CD2/LILRB1/TLR4/PLCG2/CD84/CYBB/CCL19/CCR2/ARRB2/IFNG/ACP5/GPNMB/PTPN6/UBE2J1/TNFAIP3/HLA-E/IL33/CD14/TNFRSF8/SYK/TLR1/SIRPA/LILRA4/JAK2/CD36/IL10/SYT11/TYROBP/CX3CL1/PTAFR/IL12B/RASGRP1/FOXP3/LY96/APP/SPN/CD33/CD34/NOD2/IL27RA/PTPN22/IRAK3/ANGPT1	47
BP	GO:0002822	regulation of adaptive immune response based on somatic recombination of immune receptors built from immunoglobulin superfamily domains	45/982	168/18723	3.26865e-20	1.99576e-18	1.38656e-18	PTPRC/WAS/SLAMF1/TNFRSF1B/SASH3/NCKAP1L/LILRB1/PRKCQ/CD1D/BTK/CD226/LILRB4/KLRD1/IL7R/CR1/CD4/CCL19/TBX21/CCR2/LTA/IL12RB1/FCGR2B/PTPN6/TNFAIP3/HLA-E/CD28/B2M/PARP3/ANXA1/JAK3/IL10/CR2/C3/HLX/FCER2/IL12B/FOXP3/TNF/HLA-F/NOD2/IL18R1/IL27RA/FUT7/HLA-DRA/FBXO38	45
BP	GO:0032729	positive regulation of interferon-gamma production	30/982	72/18723	5.0315e-20	3.0372e-18	2.1101e-18	SLAMF1/SASH3/CD2/CD3E/LILRB1/IRF8/TLR4/PDE4B/CD226/TLR8/CRTAM/CCR2/LTA/IL12RB1/CD244/TLR7/EBI3/CD14/TXK/BTN3A1/IL12B/RASGRP1/BTN3A2/TNF/HLA-DPB1/HLA-DPA1/IL18R1/IL27RA/PTPN22/PDE4D	30
BP	GO:0002704	negative regulation of leukocyte mediated immunity	28/982	63/18723	1.05599e-19	6.3027e-18	4.37882e-18	PTPRC/SLAMF1/NCKAP1L/LILRB1/LILRB4/KLRD1/IL7R/CR1/CD96/CD84/TBX21/CCR2/ARRB2/FCGR2B/HMOX1/PTPN6/HLA-E/FOXF1/PARP3/CD300A/JAK3/CR2/SERPINB9/FOXP3/SPI1/HLA-F/NOD2/IL13RA2	28
BP	GO:0050671	positive regulation of lymphocyte proliferation	40/982	137/18723	1.36862e-19	8.07791e-18	5.61215e-18	PTPRC/SLAMF1/CD6/ZAP70/SASH3/CCL5/NCKAP1L/CD3E/TLR4/CORO1A/PRKCQ/CD1D/LILRB2/CCL19/CD86/CCR2/IL12RB1/CD40LG/EBI3/HLA-E/CD28/SYK/AIF1/GPR183/ANXA1/JAK3/TNFRSF4/HLA-DMB/IL12B/PDCD1LG2/VCAM1/FOXP3/CD209/HLA-DPB1/HLA-DPA1/IL2RA/BST1/IL27RA/PTPN22/IL15	40
BP	GO:0032946	positive regulation of mononuclear cell proliferation	40/982	138/18723	1.83228e-19	1.06957e-17	7.43086e-18	PTPRC/SLAMF1/CD6/ZAP70/SASH3/CCL5/NCKAP1L/CD3E/TLR4/CORO1A/PRKCQ/CD1D/LILRB2/CCL19/CD86/CCR2/IL12RB1/CD40LG/EBI3/HLA-E/CD28/SYK/AIF1/GPR183/ANXA1/JAK3/TNFRSF4/HLA-DMB/IL12B/PDCD1LG2/VCAM1/FOXP3/CD209/HLA-DPB1/HLA-DPA1/IL2RA/BST1/IL27RA/PTPN22/IL15	40
BP	GO:0045580	regulation of T cell differentiation	41/982	146/18723	2.34648e-19	1.35484e-17	9.41277e-18	PTPRC/IRF4/ZAP70/SASH3/CD2/NCKAP1L/CD27/RHOH/FGL2/LILRB2/PRDM1/LILRB4/RUNX3/IL7R/CR1/CCL19/TBX21/CD86/CRTAM/CCR2/LAG3/IFNG/IL12RB1/CTLA4/IRF1/CD28/SYK/ANXA1/ADAM8/JAK3/HLX/IL12B/RASGRP1/HLA-DOA/FOXP3/CAMK4/IL2RA/IL15/CD83/HLA-DRA/SOX4	41
BP	GO:0031341	regulation of cell killing	34/982	99/18723	2.45362e-19	1.40146e-17	9.73671e-18	PTPRC/SH2D1A/IL18RAP/NCKAP1L/LILRB1/PRF1/CD1D/CD226/STAP1/KLRD1/IL7R/NCR3/CRTAM/LAG3/ARRB2/IFNG/DNASE1L3/IL12RB1/FCGR2B/HLA-E/B2M/SYK/TYROBP/P2RX7/CD59/SERPINB9/FCER2/IL12B/VAV1/RASGRP1/SPI1/HLA-F/BCL2L1/HLA-DRA	34
BP	GO:0070098	chemokine-mediated signaling pathway	32/982	88/18723	3.87543e-19	2.19003e-17	1.52153e-17	CXCR6/CCL5/CCR7/CXCL13/CXCR3/CMKLR1/CXCR4/CXCR5/CCL4/CCL19/CXCL9/CCR2/CCR5/CCR1/PTK2B/CXCL12/SH2B3/CXCL10/CCL21/SLIT3/CCL18/CX3CL1/CCL8/CXCL11/CCR6/CCRL2/CXCR2/CCL11/CCL2/ROBO1/CCL17/THPO	32
BP	GO:0018108	peptidyl-tyrosine phosphorylation	67/982	375/18723	5.98374e-19	3.34586e-17	2.32454e-17	PTPRC/NCF1/MET/ITK/ZAP70/CCL5/HCLS1/PECAM1/CD3E/LCK/PLCG2/BTK/LILRB4/STAP1/SAMSN1/CD4/ACVR1/FGR/SEMA4D/EREG/ARRB2/ENPP2/IFNG/BMP6/BANK1/EPHA2/PTPN6/PTK2B/PDGFC/FLT3/IL24/TEK/TNFRSF14/SH2B3/SYK/CSF2/JAK2/HCK/NRP1/CD36/ADORA1/CD300A/JAK3/CSF1R/FYN/TXK/IL12B/MAP2K6/PTPN1/TIE1/ITGB2/TNF/APP/FER/CSK/NOD2/BST1/MATK/HSF1/ROR1/ACE/IL15/FCGR1A/IQGAP1/MVP/ANGPT1/LRRK1	67
BP	GO:0070665	positive regulation of leukocyte proliferation	41/982	150/18723	6.9818e-19	3.83964e-17	2.6676e-17	PTPRC/SLAMF1/CD6/ZAP70/SASH3/CCL5/NCKAP1L/CD3E/TLR4/CORO1A/PRKCQ/CD1D/LILRB2/CCL19/CD86/CCR2/IL12RB1/CD40LG/EBI3/HLA-E/CD28/SYK/AIF1/GPR183/ANXA1/JAK3/CSF1R/TNFRSF4/HLA-DMB/IL12B/PDCD1LG2/VCAM1/FOXP3/CD209/HLA-DPB1/HLA-DPA1/IL2RA/BST1/IL27RA/PTPN22/IL15	41
BP	GO:0032635	interleukin-6 production	43/982	165/18723	7.08367e-19	3.83964e-17	2.6676e-17	IL16/SLAMF1/NCKAP1L/TLR4/PLCG2/LILRB2/LILRB4/TLR8/CD84/INPP5D/EREG/BCL10/CAPN2/ARRB2/IFNG/BANK1/IL1RAP/PTPN6/TNFAIP3/TLR7/IL33/SYK/TLR1/SIRPA/CD200/AIF1/CD36/IL10/SYT11/TYROBP/CX3CL1/PTAFR/FOXP3/KLF2/TNF/APP/CSK/IL17RA/NOD2/IL27RA/TLR6/PTPN22/IRAK3	43
BP	GO:0032675	regulation of interleukin-6 production	43/982	165/18723	7.08367e-19	3.83964e-17	2.6676e-17	IL16/SLAMF1/NCKAP1L/TLR4/PLCG2/LILRB2/LILRB4/TLR8/CD84/INPP5D/EREG/BCL10/CAPN2/ARRB2/IFNG/BANK1/IL1RAP/PTPN6/TNFAIP3/TLR7/IL33/SYK/TLR1/SIRPA/CD200/AIF1/CD36/IL10/SYT11/TYROBP/CX3CL1/PTAFR/FOXP3/KLF2/TNF/APP/CSK/IL17RA/NOD2/IL27RA/TLR6/PTPN22/IRAK3	43
BP	GO:0018212	peptidyl-tyrosine modification	67/982	378/18723	9.25946e-19	4.96831e-17	3.45175e-17	PTPRC/NCF1/MET/ITK/ZAP70/CCL5/HCLS1/PECAM1/CD3E/LCK/PLCG2/BTK/LILRB4/STAP1/SAMSN1/CD4/ACVR1/FGR/SEMA4D/EREG/ARRB2/ENPP2/IFNG/BMP6/BANK1/EPHA2/PTPN6/PTK2B/PDGFC/FLT3/IL24/TEK/TNFRSF14/SH2B3/SYK/CSF2/JAK2/HCK/NRP1/CD36/ADORA1/CD300A/JAK3/CSF1R/FYN/TXK/IL12B/MAP2K6/PTPN1/TIE1/ITGB2/TNF/APP/FER/CSK/NOD2/BST1/MATK/HSF1/ROR1/ACE/IL15/FCGR1A/IQGAP1/MVP/ANGPT1/LRRK1	67
BP	GO:0030593	neutrophil chemotaxis	34/982	103/18723	1.02512e-18	5.44545e-17	3.78324e-17	CCL5/NCKAP1L/PDE4B/CCR7/CXCL13/PIK3CG/CCL4/CCL19/CXCL9/PIK3CD/FCER1G/SYK/CXCL10/CCL21/MPP1/DPP4/C5AR1/CCL18/LGALS3/C3AR1/RAC2/CX3CL1/CCL8/VAV1/CXCL11/ITGB2/TGFB2/NOD2/BST1/CXCR2/CCL11/CCL2/CCL17/S100A8	34
BP	GO:0042116	macrophage activation	34/982	106/18723	2.84942e-18	1.49862e-16	1.04117e-16	PTPRC/TLR4/PLCG2/NR1H3/STAP1/CD84/IFNG/C1QA/FCGR2B/IL33/SYK/TLR1/CSF2/CST7/JAK2/CD200/AIF1/CD93/C5AR1/IL10/SYT11/GPR137B/TYROBP/SNCA/CX3CL1/IFNGR2/ITGB2/TNF/APP/RORA/CEBPA/VSIG4/TLR6/FPR2	34
BP	GO:0007204	positive regulation of cytosolic calcium ion concentration	60/982	319/18723	3.37144e-18	1.75579e-16	1.21984e-16	PTPRC/CXCR6/GPR18/MS4A1/GPR65/LCK/CORO1A/P2RY10/CCR7/PLCG2/CXCL13/CXCR3/CMKLR1/P2RX1/S1PR1/CXCR4/CXCR5/PIK3CG/FASLG/PTGDR/CCL19/CXCL9/CD52/CCR2/CCR5/CCR1/FPR3/PTPN6/PTK2B/LPAR6/TRPV2/S1PR4/JAK2/CXCL10/CCL21/CD36/PTGER4/EDNRB/C5AR1/FYN/P2RX7/FPR1/SNCA/C3AR1/CX3CL1/CXCL11/ITPR1/CCR6/MCOLN1/CCRL2/RASA3/CXCR2/FPR2/LRP1/NPTN/C1QTNF1/PDE4D/EDNRA/PML/CALCA	60
BP	GO:0002687	positive regulation of leukocyte migration	38/982	135/18723	4.48156e-18	2.31126e-16	1.60576e-16	SLAMF1/CCL5/NCKAP1L/CCR7/CXCL13/PLA2G7/CMKLR1/ITGA2/CCL4/CCL19/CCR2/CCR1/PTK2B/TNFRSF14/CXCL12/JAM2/ITGA4/CXCL10/CCL21/AIF1/ADAM8/C5AR1/CSF1R/GPSM3/LGALS3/C3AR1/RAC2/CX3CL1/CCL8/PTAFR/SPI1/RARRES2/TNF/APP/CCR6/SPN/CXCR2/FPR2	38
BP	GO:0007162	negative regulation of cell adhesion	58/982	303/18723	5.27977e-18	2.69675e-16	1.87357e-16	PTPRC/LAX1/PLA2G2D/ADAMDEC1/NCKAP1L/LPXN/LILRB1/FGL2/LILRB2/LILRB4/RUNX3/LAPTM5/CR1/SEMA4D/TBX21/CD86/CRTAM/LAG3/TNC/BMP6/RASA1/GPNMB/CTLA4/FCGR2B/PTPN6/IRF1/BTN2A2/TNFRSF14/CXCL12/SH2B3/PLXNC1/JAK2/ACVRL1/CCL21/CYP1B1/TGFBI/ANXA1/GBP1/CD300A/JAK3/IL10/FBLN1/LGALS3/HLX/CX3CL1/PDCD1LG2/EPCAM/FOXP3/SPI1/SFTPD/SPN/IL2RA/VSIG4/JAG1/LRP1/PTPN22/C1QTNF1/ANGPT1	58
BP	GO:0072503	cellular divalent inorganic cation homeostasis	76/982	486/18723	7.27425e-18	3.68008e-16	2.55674e-16	PTPRC/PRKCB/CXCR6/CCL5/GPR18/MS4A1/GPR65/LCK/CORO1A/P2RY10/CCR7/PLCG2/CXCL13/CXCR3/CMKLR1/P2RX1/S1PR1/CXCR4/CXCR5/PIK3CG/APOE/FASLG/PTGDR/CCL19/CXCL9/CD52/CCR2/CCR5/CCR1/FPR3/PTPN6/PTK2B/ANXA6/CXCL12/LPAR6/TRPV2/S1PR4/JAK2/CXCL10/CCL21/CD36/ADORA1/PTGER4/EDNRB/C5AR1/FYN/P2RX7/FPR1/SNCA/C3AR1/CX3CL1/CCL8/MT1F/MT1E/CXCL11/ITPR1/APP/CAV2/CCR6/MCOLN1/CCRL2/RASA3/CXCR2/FPR2/LRP1/CCL11/NPTN/C1QTNF1/PDE…	76
BP	GO:1990868	response to chemokine	32/982	97/18723	1.09939e-17	5.4579e-16	3.79189e-16	CXCR6/CCL5/CCR7/CXCL13/CXCR3/CMKLR1/CXCR4/CXCR5/CCL4/CCL19/CXCL9/CCR2/CCR5/CCR1/PTK2B/CXCL12/SH2B3/CXCL10/CCL21/SLIT3/CCL18/CX3CL1/CCL8/CXCL11/CCR6/CCRL2/CXCR2/CCL11/CCL2/ROBO1/CCL17/THPO	32
BP	GO:1990869	cellular response to chemokine	32/982	97/18723	1.09939e-17	5.4579e-16	3.79189e-16	CXCR6/CCL5/CCR7/CXCL13/CXCR3/CMKLR1/CXCR4/CXCR5/CCL4/CCL19/CXCL9/CCR2/CCR5/CCR1/PTK2B/CXCL12/SH2B3/CXCL10/CCL21/SLIT3/CCL18/CX3CL1/CCL8/CXCL11/CCR6/CCRL2/CXCR2/CCL11/CCL2/ROBO1/CCL17/THPO	32
BP	GO:0043410	positive regulation of MAPK cascade	75/982	480/18723	1.27028e-17	6.08674e-16	4.22878e-16	PTPRC/NCF1/SLAMF1/CCL5/CD27/TLR4/CCR7/PLCG2/RASSF2/PIK3CG/LAPTM5/APOE/CD4/CCL4/CCL19/CCR1/ARRB2/BANK1/GPNMB/SPRY2/PIK3R5/FCGR2B/PTK2B/PDGFC/FLT3/FGD2/GADD45A/TEK/BCAR3/SYK/CCL21/NRP1/CD36/GPR183/ADAM8/C5AR1/PHB/CSF1R/CCL18/CX3CL1/CCL8/MAP2K6/TRAF3/PTPN1/TRAF4/RASGRP1/KSR1/FGA/MAP3K3/SPI1/TNF/APP/CAV2/TGFB2/LAMTOR3/CSK/NOD2/SDCBP/TLR6/FPR2/ROR1/LRP1/CCL11/ADRB2/PTPN22/NPTN/MAP3K13/C1QTNF1/CCL2/IQG…	75
BP	GO:0032615	interleukin-12 production	26/982	62/18723	1.28335e-17	6.08674e-16	4.22878e-16	IL16/SLAMF1/LILRB1/IRF8/TLR4/CCR7/PLCG2/CMKLR1/TLR8/LAPTM5/CCL19/ARRB2/IFNG/ACP5/CD40LG/IRF1/LTB/SYK/CD36/JAK3/IL10/IL12B/MEFV/IRF5/NOD2/IRAK3	26
BP	GO:0032623	interleukin-2 production	26/982	62/18723	1.28335e-17	6.08674e-16	4.22878e-16	PTPRC/IRF4/SASH3/CD3E/PDE4B/PRKCQ/PLCG2/LILRB4/LAPTM5/CR1/CD4/TBX21/CD86/CCR2/LAG3/TNFAIP3/CD28/ANXA1/GBP1/FOXP3/SFTPD/VSIG4/CD34/NOD2/PDE4D/CD83	26
BP	GO:0032655	regulation of interleukin-12 production	26/982	62/18723	1.28335e-17	6.08674e-16	4.22878e-16	IL16/SLAMF1/LILRB1/IRF8/TLR4/CCR7/PLCG2/CMKLR1/TLR8/LAPTM5/CCL19/ARRB2/IFNG/ACP5/CD40LG/IRF1/LTB/SYK/CD36/JAK3/IL10/IL12B/MEFV/IRF5/NOD2/IRAK3	26
BP	GO:0032663	regulation of interleukin-2 production	26/982	62/18723	1.28335e-17	6.08674e-16	4.22878e-16	PTPRC/IRF4/SASH3/CD3E/PDE4B/PRKCQ/PLCG2/LILRB4/LAPTM5/CR1/CD4/TBX21/CD86/CCR2/LAG3/TNFAIP3/CD28/ANXA1/GBP1/FOXP3/SFTPD/VSIG4/CD34/NOD2/PDE4D/CD83	26
BP	GO:0046634	regulation of alpha-beta T cell activation	33/982	104/18723	1.29811e-17	6.10228e-16	4.23957e-16	PTPRC/IRF4/ZAP70/SASH3/NCKAP1L/CD3E/LILRB1/PRKCQ/PRDM1/LILRB4/RUNX3/CCL19/TBX21/CD86/CRTAM/CCR2/IFNG/IL12RB1/IRF1/EBI3/HLA-E/CD28/TNFRSF14/SYK/ANXA1/CD300A/JAK3/HLX/IL12B/FOXP3/PTPN22/CD83/HLA-DRA	33
BP	GO:0055074	calcium ion homeostasis	73/982	460/18723	1.47018e-17	6.85053e-16	4.75942e-16	PTPRC/PRKCB/CXCR6/CCL5/GPR18/MS4A1/GPR65/LCK/CORO1A/P2RY10/CCR7/PLCG2/CXCL13/CXCR3/CMKLR1/P2RX1/S1PR1/CXCR4/CXCR5/PIK3CG/APOE/FASLG/PTGDR/CCL19/CXCL9/CD52/CCR2/CCR5/CCR1/FPR3/PTPN6/PTK2B/ANXA6/CXCL12/LPAR6/TRPV2/S1PR4/JAK2/CXCL10/CCL21/CD36/ADORA1/SNX10/PTGER4/EDNRB/C5AR1/FYN/P2RX7/FPR1/SNCA/C3AR1/CX3CL1/CCL8/CAMK2N1/CXCL11/ITPR1/APP/CAV2/CCR6/MCOLN1/CCRL2/RASA3/CXCR2/FPR2/LRP1/CCL11/NPTN/C1QTNF1…	73
BP	GO:0002444	myeloid leukocyte mediated immunity	32/982	99/18723	2.1802e-17	1.00706e-15	6.9966e-16	BTK/PTGDS/STAP1/PIK3CG/FGR/CD84/PTGDR/CCR2/DNASE1L3/FCGR2B/HMOX1/PIK3CD/HLA-E/FOXF1/SYK/ANXA3/LAT/CD300A/TYROBP/C3/SERPINB9/RAC2/PTAFR/RASGRP1/ITGB2/SPI1/TRAF3IP2/FER/IL13RA2/ACE/C12orf4/IRAK4	32
BP	GO:1902107	positive regulation of leukocyte differentiation	40/982	157/18723	2.82427e-17	1.28227e-15	8.90858e-16	PTPRC/EVI2B/ZAP70/SASH3/HCLS1/NCKAP1L/CD27/RHOH/LILRB2/BTK/LILRB4/RUNX3/IL7R/CR1/CD4/INPP5D/CCL19/CD86/CCR1/IFNG/IL12RB1/ZFP36L1/SYK/ANXA1/ADAM8/IL10/TYROBP/HLX/IL12B/RASGRP1/FOXP3/TNF/IL2RA/HSF1/IL15RA/IL15/CD83/HLA-DRA/RB1/SOX4	40
BP	GO:1903708	positive regulation of hemopoiesis	40/982	157/18723	2.82427e-17	1.28227e-15	8.90858e-16	PTPRC/EVI2B/ZAP70/SASH3/HCLS1/NCKAP1L/CD27/RHOH/LILRB2/BTK/LILRB4/RUNX3/IL7R/CR1/CD4/INPP5D/CCL19/CD86/CCR1/IFNG/IL12RB1/ZFP36L1/SYK/ANXA1/ADAM8/IL10/TYROBP/HLX/IL12B/RASGRP1/FOXP3/TNF/IL2RA/HSF1/IL15RA/IL15/CD83/HLA-DRA/RB1/SOX4	40
BP	GO:0031348	negative regulation of defense response	52/982	258/18723	2.90267e-17	1.30669e-15	9.07827e-16	NT5E/PTPRC/TNFRSF1B/AOAH/LILRB1/FGL2/NR1H3/KLRD1/APOE/CR1/FGR/CD96/SLAMF8/SAMHD1/ARRB2/ACP5/CALCRL/FCGR2B/TNFAIP3/HLA-E/TEK/SERPING1/FOXF1/SYK/SEC14L1/CST7/SIRPA/CD200/HCK/PTGIS/ADORA1/PTGER4/A2M/FYN/IL10/SYT11/SERPINB9/CX3CL1/IL12B/RNF125/MEFV/FOXP3/SHARPIN/HLA-F/RORA/MUL1/IL2RA/VSIG4/NOD2/FPR2/IRAK3/RB1	52
BP	GO:0051480	regulation of cytosolic calcium ion concentration	62/982	353/18723	3.0339e-17	1.35429e-15	9.40898e-16	PTPRC/CXCR6/GPR18/MS4A1/GPR65/LCK/CORO1A/P2RY10/CCR7/PLCG2/CXCL13/CXCR3/CMKLR1/P2RX1/S1PR1/CXCR4/CXCR5/PIK3CG/FASLG/PTGDR/CCL19/CXCL9/CD52/CCR2/CCR5/CCR1/FPR3/PTPN6/PTK2B/LPAR6/TRPV2/S1PR4/JAK2/CXCL10/CCL21/CD36/ADORA1/PTGER4/EDNRB/C5AR1/FYN/P2RX7/FPR1/SNCA/C3AR1/CX3CL1/CXCL11/ITPR1/CAV2/CCR6/MCOLN1/CCRL2/RASA3/CXCR2/FPR2/LRP1/NPTN/C1QTNF1/PDE4D/EDNRA/PML/CALCA	62
BP	GO:0006874	cellular calcium ion homeostasis	71/982	448/18723	4.47902e-17	1.98271e-15	1.37749e-15	PTPRC/PRKCB/CXCR6/CCL5/GPR18/MS4A1/GPR65/LCK/CORO1A/P2RY10/CCR7/PLCG2/CXCL13/CXCR3/CMKLR1/P2RX1/S1PR1/CXCR4/CXCR5/PIK3CG/APOE/FASLG/PTGDR/CCL19/CXCL9/CD52/CCR2/CCR5/CCR1/FPR3/PTPN6/PTK2B/ANXA6/CXCL12/LPAR6/TRPV2/S1PR4/JAK2/CXCL10/CCL21/CD36/ADORA1/PTGER4/EDNRB/C5AR1/FYN/P2RX7/FPR1/SNCA/C3AR1/CX3CL1/CCL8/CXCL11/ITPR1/APP/CAV2/CCR6/MCOLN1/CCRL2/RASA3/CXCR2/FPR2/LRP1/CCL11/NPTN/C1QTNF1/PDE4D/EDNRA/P…	71
BP	GO:0002688	regulation of leukocyte chemotaxis	35/982	122/18723	4.84369e-17	2.12182e-15	1.47414e-15	SLAMF1/CCL5/GPR18/NCKAP1L/CCR7/CXCL13/PLA2G7/CMKLR1/STAP1/SLAMF8/CCL4/CCL19/CCR2/CCR1/PTK2B/CXCL12/CXCL10/CCL21/AIF1/MPP1/DPP4/C5AR1/CSF1R/GPSM3/C3AR1/RAC2/MMP28/SPI1/RARRES2/CCR6/NOD2/BST1/CXCR2/FPR2/CCL2	35
BP	GO:0071675	regulation of mononuclear cell migration	34/982	115/18723	4.87316e-17	2.12182e-15	1.47414e-15	SLAMF1/CCL5/CCR7/CXCL13/PLA2G7/CMKLR1/SLAMF8/CCL4/STK10/CCR2/CCR1/PTK2B/TNFRSF14/CXCL12/JAM2/ITGA4/CD200/CXCL10/CCL21/AIF1/ADAM8/C5AR1/CSF1R/LGALS3/C3AR1/SPI1/RARRES2/TNF/APP/CCR6/SPN/IL27RA/FPR2/CCL2	34
BP	GO:0070664	negative regulation of leukocyte proliferation	30/982	90/18723	8.3021e-17	3.58543e-15	2.49098e-15	PLA2G2D/LILRB1/LILRB2/BTK/LILRB4/CR1/INPP5D/CD86/CRTAM/GPNMB/CTLA4/FCGR2B/PTPN6/TNFAIP3/IL33/BTN2A2/TNFRSF14/CD300A/IL10/TYROBP/ATM/LST1/CCL8/PDCD1LG2/MNDA/FOXP3/SFTPD/SPN/IL2RA/VSIG4	30
BP	GO:0043299	leukocyte degranulation	27/982	73/18723	1.40762e-16	6.03006e-15	4.1894e-15	NCKAP1L/CORO1A/BTK/PTGDS/PIK3CG/FGR/CD84/PTGDR/CCR2/FCGR2B/HMOX1/PIK3CD/FOXF1/SYK/HCK/ANXA3/LAT/CD300A/RAC2/PTAFR/RASGRP1/ITGB2/SPI1/HLA-F/FER/IL13RA2/C12orf4	27
BP	GO:0046632	alpha-beta T cell differentiation	33/982	112/18723	1.57904e-16	6.71028e-15	4.66198e-15	PLA2G2D/LY9/IRF4/ITK/ZAP70/SASH3/GPR18/NCKAP1L/PRDM1/LILRB4/RUNX3/BCL11B/CCL19/TBX21/CD86/IFNG/IL12RB1/TNFSF8/IRF1/SYK/GPR183/ANXA1/PTGER4/JAK3/HLX/IL12B/FOXP3/RORA/SPN/IL18R1/CD83/FUT7/HLA-DRA	33
BP	GO:0050920	regulation of chemotaxis	47/982	223/18723	1.60063e-16	6.74807e-15	4.68824e-15	IL16/SLAMF1/MET/CCL5/GPR18/NCKAP1L/CCR7/CXCL13/PLA2G7/CMKLR1/S1PR1/STAP1/CXCR4/ITGA2/SLAMF8/SEMA4D/CCL4/CCL19/CCR2/CCR1/MYCBP2/PTK2B/SEMA3C/EFNB2/CXCL12/CXCL10/CCL21/AIF1/MPP1/NRP1/GPR183/DPP4/C5AR1/CSF1R/GPSM3/C3AR1/RAC2/MMP28/SPI1/RARRES2/CCR6/NOD2/BST1/CXCR2/FPR2/CCL2/ROBO1	47
BP	GO:0002705	positive regulation of leukocyte mediated immunity	36/982	134/18723	1.7653e-16	7.38367e-15	5.12982e-15	PTPRC/SLAMF1/SASH3/SH2D1A/IL18RAP/CD1D/PLCG2/BTK/CD226/STAP1/KLRD1/NCR3/TBX21/CRTAM/LAG3/LTA/IL12RB1/HLA-E/CD28/B2M/TYROBP/C3/FCER2/PTAFR/IL12B/VAV1/RASGRP1/FOXP3/ITGB2/SPI1/TNF/HLA-F/NOD2/IL18R1/HLA-DRA/FBXO38	36
BP	GO:0030099	myeloid cell differentiation	63/982	381/18723	3.48893e-16	1.44791e-14	1.00594e-14	IKZF1/FLI1/EVI2B/IRF4/HCLS1/NCKAP1L/LILRB1/IRF8/TLR4/CCR7/GPR171/LILRB4/RASSF2/LILRB3/CD4/INPP5D/CCL19/CCR1/IFNG/EPHA2/MAFB/PTPN6/PTK2B/PIK3CD/ZFP36L1/CBFA2T3/SNRK/B2M/SH2B3/ANXA2/CSF2/JAK2/GPR183/SNX10/JAK3/CSF1R/STAT1/GPR137B/TYROBP/IL12B/ETS1/OSTM1/BPGM/KLF2/CAMK4/SPI1/TNF/APP/CEBPA/MMP9/HSF1/JAG1/IL15/MEIS1/FASN/HOXA5/TGFBR3/PML/THPO/CLDN18/RB1/EIF2AK1/LRRK1	63
BP	GO:0050868	negative regulation of T cell activation	34/982	122/18723	3.60953e-16	1.48634e-14	1.03264e-14	LAX1/PLA2G2D/NCKAP1L/LILRB1/FGL2/LILRB2/LILRB4/RUNX3/LAPTM5/CR1/TBX21/CD86/CRTAM/LAG3/GPNMB/CTLA4/FCGR2B/PTPN6/IRF1/BTN2A2/TNFRSF14/ANXA1/CD300A/JAK3/IL10/LGALS3/HLX/PDCD1LG2/FOXP3/SFTPD/SPN/IL2RA/VSIG4/PTPN22	34
BP	GO:0050764	regulation of phagocytosis	30/982	95/18723	4.5238e-16	1.8485e-14	1.28425e-14	PTPRC/DOCK2/IL2RG/NCKAP1L/IL2RB/SIRPG/PLCG2/STAP1/ITGA2/FGR/IFNG/FCGR2B/FCER1G/SYK/SIRPA/HCK/CD36/CD300A/SYT11/C3/TNF/SFTPD/CSK/NOD2/FPR2/LRP1/IL15RA/IL15/CCL2/PLA2G5	30
BP	GO:0002718	regulation of cytokine production involved in immune response	30/982	96/18723	6.25596e-16	2.53677e-14	1.76243e-14	SLAMF1/TNFRSF1B/SASH3/LILRB1/TLR4/PLCG2/BTK/CD226/LILRB4/LAPTM5/CD96/TBX21/BCL10/CCR2/HMOX1/HLA-E/TNFRSF14/B2M/CD36/JAK3/IL10/FOXP3/TNF/HLA-F/TGFB2/NOD2/IL18R1/TRIL/IRAK3/ANGPT1	30
BP	GO:0006968	cellular defense response	23/982	54/18723	6.37983e-16	2.5674e-14	1.78371e-14	NCF1/ITK/SH2D1A/TRAT1/PRF1/LILRB2/CXCL9/BCL10/CCR2/CCR5/KLRG1/PTK2B/IL33/GNLY/LSP1/C5AR1/TYROBP/MNDA/LY96/CCR6/SPN/CXCR2/CD300C	23
BP	GO:0022408	negative regulation of cell-cell adhesion	43/982	196/18723	6.82048e-16	2.72409e-14	1.89257e-14	LAX1/PLA2G2D/NCKAP1L/LILRB1/FGL2/LILRB2/LILRB4/RUNX3/LAPTM5/CR1/TBX21/CD86/CRTAM/LAG3/BMP6/GPNMB/CTLA4/FCGR2B/PTPN6/IRF1/BTN2A2/TNFRSF14/CXCL12/SH2B3/JAK2/CCL21/ANXA1/CD300A/JAK3/IL10/LGALS3/HLX/PDCD1LG2/EPCAM/FOXP3/SPI1/SFTPD/SPN/IL2RA/VSIG4/JAG1/PTPN22/C1QTNF1	43
BP	GO:0071346	cellular response to interferon-gamma	33/982	118/18723	8.78482e-16	3.48246e-14	2.41945e-14	WAS/CCL5/IRF8/TLR4/NR1H3/FASLG/CCL4/CCL19/IFNG/IL12RB1/IRF1/SIRPA/JAK2/CCL21/AIF1/HCK/CASP1/GBP1/STAT1/TXK/CD58/CCL18/CX3CL1/CCL8/IFNGR2/IL12B/CLDN1/AQP4/HLA-DPA1/CCL11/CCL2/CDC42EP4/CCL17	33
BP	GO:0045621	positive regulation of lymphocyte differentiation	31/982	104/18723	9.12059e-16	3.58878e-14	2.49332e-14	PTPRC/ZAP70/SASH3/NCKAP1L/CD27/RHOH/LILRB2/BTK/LILRB4/RUNX3/IL7R/CR1/INPP5D/CCL19/CD86/IFNG/IL12RB1/SYK/ANXA1/ADAM8/IL10/HLX/IL12B/RASGRP1/FOXP3/IL2RA/IL15RA/IL15/CD83/HLA-DRA/SOX4	31
BP	GO:0002440	production of molecular mediator of immune response	55/982	308/18723	9.33684e-16	3.64686e-14	2.53367e-14	PTPRC/SLAMF1/TNFRSF1B/SASH3/LILRB1/TLR4/PLCG2/BTK/CD226/LILRB4/LAPTM5/CD22/CR1/CD96/TBX21/CD86/SAMHD1/BCL10/CCR2/HLA-DOB/CD40LG/FCGR2B/HMOX1/CD244/HLA-E/CD28/TNFRSF14/B2M/PARP3/CD36/JAK3/PHB/IL10/TNFRSF4/HLA-DMB/HLA-DOA/FOXP3/TRAF3IP2/TNF/HLA-F/TGFB2/HLA-DPB1/HLA-DPA1/CCR6/HLA-DMA/DNAJB9/NOD2/IL18R1/IL13RA2/TRIL/IL27RA/PTPN22/IRAK3/HLA-DRA/ANGPT1	55
BP	GO:0072678	T cell migration	25/982	66/18723	9.75692e-16	3.78312e-14	2.62833e-14	ZAP70/ITGAL/CCL5/CXCL13/CXCR3/ITGB7/S1PR1/PIK3CG/CCR2/PIK3CD/TNFRSF14/CXCL12/ITGA4/CD200/CXCL10/CCL21/AIF1/GPR183/ADAM8/CXCL11/APP/CCR6/SPN/IL27RA/CCL2	25
BP	GO:0030183	B cell differentiation	36/982	141/18723	1.02885e-15	3.90376e-14	2.71215e-14	PTPRC/MS4A1/NCKAP1L/CD79B/CD27/IRF8/PLCG2/MFNG/BTK/ITM2A/CR1/PLCL2/SLAMF8/INPP5D/BLNK/HHEX/CD40LG/FCGR2B/PTPN6/PTK2B/FLT3/ZFP36L1/SYK/DOCK10/ITGA4/IKZF3/GPR183/JAK3/IL10/CR2/ATM/LYL1/VCAM1/SPI1/TRAF3IP2/DNAJB9	36
BP	GO:0034341	response to interferon-gamma	36/982	141/18723	1.02885e-15	3.90376e-14	2.71215e-14	WAS/CCL5/IRF8/TLR4/NR1H3/FASLG/CCL4/CCL19/IFNG/IL12RB1/IRF1/SIRPA/JAK2/CCL21/AIF1/HCK/CASP1/GBP1/STAT1/TXK/CD58/SNCA/CCL18/CIITA/CX3CL1/CCL8/IFNGR2/IL12B/MEFV/CLDN1/AQP4/HLA-DPA1/CCL11/CCL2/CDC42EP4/CCL17	36
BP	GO:1903038	negative regulation of leukocyte cell-cell adhesion	36/982	141/18723	1.02885e-15	3.90376e-14	2.71215e-14	LAX1/PLA2G2D/NCKAP1L/LILRB1/FGL2/LILRB2/LILRB4/RUNX3/LAPTM5/CR1/TBX21/CD86/CRTAM/LAG3/GPNMB/CTLA4/FCGR2B/PTPN6/IRF1/BTN2A2/TNFRSF14/CXCL12/CCL21/ANXA1/CD300A/JAK3/IL10/LGALS3/HLX/PDCD1LG2/FOXP3/SFTPD/SPN/IL2RA/VSIG4/PTPN22	36
BP	GO:0002275	myeloid cell activation involved in immune response	29/982	91/18723	1.0634e-15	4.00622e-14	2.78333e-14	SLAMF1/DOCK2/PLCG2/BTK/PTGDS/PIK3CG/FGR/CD84/PTGDR/CCR2/IFNG/DNASE1L3/HMOX1/PIK3CD/FCER1G/FOXF1/SYK/ANXA3/LAT/CD300A/TYROBP/RAC2/PTAFR/RASGRP1/ITGB2/SPI1/FER/IL13RA2/C12orf4	29
BP	GO:0002367	cytokine production involved in immune response	30/982	98/18723	1.17987e-15	4.41371e-14	3.06644e-14	SLAMF1/TNFRSF1B/SASH3/LILRB1/TLR4/PLCG2/BTK/CD226/LILRB4/LAPTM5/CD96/TBX21/BCL10/CCR2/HMOX1/HLA-E/TNFRSF14/B2M/CD36/JAK3/IL10/FOXP3/TNF/HLA-F/TGFB2/NOD2/IL18R1/TRIL/IRAK3/ANGPT1	30
BP	GO:0050730	regulation of peptidyl-tyrosine phosphorylation	50/982	264/18723	1.69433e-15	6.29392e-14	4.37272e-14	PTPRC/NCF1/CCL5/HCLS1/PECAM1/CD3E/PLCG2/LILRB4/STAP1/SAMSN1/CD4/ACVR1/SEMA4D/EREG/ARRB2/ENPP2/IFNG/BMP6/BANK1/PTPN6/PTK2B/PDGFC/FLT3/IL24/TNFRSF14/SH2B3/SYK/CSF2/JAK2/NRP1/CD36/ADORA1/CD300A/CSF1R/FYN/IL12B/PTPN1/ITGB2/TNF/APP/NOD2/BST1/HSF1/ACE/IL15/FCGR1A/IQGAP1/MVP/ANGPT1/LRRK1	50
BP	GO:0031343	positive regulation of cell killing	24/982	63/18723	3.1502e-15	1.15406e-13	8.01785e-14	PTPRC/SH2D1A/IL18RAP/PRF1/CD1D/CD226/STAP1/KLRD1/NCR3/CRTAM/LAG3/IFNG/IL12RB1/HLA-E/B2M/SYK/TYROBP/FCER2/IL12B/VAV1/RASGRP1/SPI1/HLA-F/HLA-DRA	24
BP	GO:0050854	regulation of antigen receptor-mediated signaling pathway	24/982	63/18723	3.1502e-15	1.15406e-13	8.01785e-14	PTPRC/PRKCB/SH2D1A/LPXN/TRAT1/LCK/CCR7/CD226/LILRB4/UBASH3A/STAP1/LAPTM5/KCNN4/CD22/PLCL2/BCL10/FCGR2B/PRKCH/PTPN6/PVRIG/GBP1/CD300A/LGALS3/PTPN22	24
BP	GO:0001906	cell killing	41/982	188/18723	4.0357e-15	1.46833e-13	1.02013e-13	PTPRC/SH2D1A/IL18RAP/NCKAP1L/LILRB1/CORO1A/PRF1/CD1D/GZMB/CD226/SLAMF7/STAP1/KLRD1/IL7R/NCR3/CRTAM/LAG3/ARRB2/IFNG/DNASE1L3/IL12RB1/FCGR2B/PTPN6/HLA-E/B2M/SYK/GNLY/LYZ/TYROBP/P2RX7/C3/CD59/SERPINB9/FCER2/IL12B/VAV1/RASGRP1/SPI1/HLA-F/BCL2L1/HLA-DRA	41
BP	GO:0001910	regulation of leukocyte mediated cytotoxicity	27/982	82/18723	4.1197e-15	1.4887e-13	1.03428e-13	PTPRC/SH2D1A/IL18RAP/NCKAP1L/LILRB1/CD1D/CD226/STAP1/KLRD1/IL7R/NCR3/CRTAM/LAG3/ARRB2/DNASE1L3/IL12RB1/FCGR2B/HLA-E/B2M/TYROBP/SERPINB9/IL12B/VAV1/RASGRP1/SPI1/HLA-F/HLA-DRA	27
BP	GO:0045123	cellular extravasation	25/982	70/18723	4.90811e-15	1.76161e-13	1.22389e-13	ITGAL/PECAM1/SELL/ITGB7/PIK3CG/SELPLG/CCR2/PIK3CD/CXCL12/JAM2/ITGA4/SIRPA/CCL21/PTGER4/ADAM8/CX3CL1/PTAFR/VCAM1/TNF/FER/SPN/BST1/IL27RA/CCL2/FUT7	25
BP	GO:0050672	negative regulation of lymphocyte proliferation	27/982	83/18723	5.80558e-15	2.06975e-13	1.43796e-13	PLA2G2D/LILRB1/LILRB2/BTK/LILRB4/CR1/INPP5D/CD86/CRTAM/GPNMB/CTLA4/FCGR2B/PTPN6/BTN2A2/TNFRSF14/CD300A/IL10/TYROBP/ATM/LST1/PDCD1LG2/MNDA/FOXP3/SFTPD/SPN/IL2RA/VSIG4	27
BP	GO:0071677	positive regulation of mononuclear cell migration	24/982	65/18723	7.22518e-15	2.55868e-13	1.77765e-13	SLAMF1/CCL5/CCR7/CXCL13/PLA2G7/CCL4/CCR2/CCR1/PTK2B/TNFRSF14/CXCL12/JAM2/ITGA4/CXCL10/CCL21/AIF1/ADAM8/LGALS3/SPI1/TNF/APP/CCR6/SPN/FPR2	24
BP	GO:0032945	negative regulation of mononuclear cell proliferation	27/982	84/18723	8.13469e-15	2.86169e-13	1.98816e-13	PLA2G2D/LILRB1/LILRB2/BTK/LILRB4/CR1/INPP5D/CD86/CRTAM/GPNMB/CTLA4/FCGR2B/PTPN6/BTN2A2/TNFRSF14/CD300A/IL10/TYROBP/ATM/LST1/PDCD1LG2/MNDA/FOXP3/SFTPD/SPN/IL2RA/VSIG4	27
BP	GO:0002701	negative regulation of production of molecular mediator of immune response	19/982	39/18723	1.01385e-14	3.54315e-13	2.46161e-13	SLAMF1/LILRB1/LILRB4/CD22/CR1/CD96/TBX21/FCGR2B/HMOX1/PARP3/JAK3/IL10/FOXP3/TNF/HLA-F/TGFB2/IL13RA2/IRAK3/ANGPT1	19
BP	GO:0050766	positive regulation of phagocytosis	24/982	66/18723	1.07963e-14	3.74837e-13	2.60419e-13	PTPRC/DOCK2/IL2RG/NCKAP1L/IL2RB/SIRPG/PLCG2/STAP1/ITGA2/IFNG/FCGR2B/FCER1G/SIRPA/CD36/C3/TNF/SFTPD/NOD2/FPR2/LRP1/IL15RA/IL15/CCL2/PLA2G5	24
BP	GO:0031295	T cell costimulation	20/982	44/18723	1.08949e-14	3.75804e-13	2.61091e-13	CD3E/LCK/CCR7/LILRB2/LILRB4/CD5/CCL19/CD86/ICOS/CD40LG/PTPN6/CD28/TNFRSF14/TNFSF14/CCL21/DPP4/FYN/PDCD1LG2/VAV1/CSK	20
BP	GO:0046635	positive regulation of alpha-beta T cell activation	24/982	67/18723	1.59961e-14	5.48203e-13	3.80866e-13	PTPRC/ZAP70/SASH3/NCKAP1L/CD3E/PRKCQ/LILRB4/RUNX3/CCL19/CD86/CCR2/IFNG/IL12RB1/EBI3/HLA-E/CD28/SYK/ANXA1/HLX/IL12B/FOXP3/PTPN22/CD83/HLA-DRA	24
BP	GO:0033674	positive regulation of kinase activity	68/982	467/18723	1.61729e-14	5.50707e-13	3.82605e-13	PTPRC/NCF1/MET/CCL5/NCKAP1L/TLR4/CCR7/LCP2/RASSF2/STAP1/CARD10/PIK3CG/CD4/FGR/CCL19/EREG/CD86/BCL10/IFNG/STK4/EPHA2/SPRY2/PIK3R5/PTK2B/PDGFC/FLT3/TCL1A/FGD2/CCND2/TEK/SYK/JAK2/CCL21/LAT/ADORA1/ADAM8/CD300A/PHB/CSF1R/SNCA/IL12B/MAP2K6/CAB39/PTPN1/TRAF4/RASGRP1/FGF13/TIE1/TNF/CDKN1B/TGFB2/CCDC88A/LAMTOR3/CSK/NOD2/RALB/TLR6/FPR2/ROR1/ACE/ADRB2/MAP3K13/FCGR1A/IQGAP1/ROBO1/CALCA/ANGPT1/AGAP2	68
BP	GO:0016064	immunoglobulin mediated immune response	42/982	207/18723	2.67493e-14	9.05047e-13	6.28784e-13	PTPRC/CD27/BTK/CD226/TLR8/CR1/INPP5D/TBX21/BCL10/LTA/C1QA/HLA-DOB/CD40LG/FCGR2B/PTPN6/C1S/C1QB/HLA-E/CD28/FCER1G/SERPING1/B2M/PARP3/IL10/CR2/C1R/HLA-DMB/C3/FCER2/C7/HLA-DOA/FOXP3/TRAF3IP2/TNF/HLA-DPB1/HLA-DPA1/CCR6/HLA-DMA/NOD2/IL13RA2/IL27RA/HLA-DRA	42
BP	GO:0002456	T cell mediated immunity	30/982	109/18723	2.8743e-14	9.66346e-13	6.71371e-13	PTPRC/WAS/SLAMF1/TNFRSF1B/SASH3/NCKAP1L/LILRB1/PRF1/CD1D/LILRB4/CD8A/KLRD1/IL7R/TBX21/CCR2/IL12RB1/FCGR2B/HLA-E/BTN3A3/B2M/IL12B/BTN3A2/FOXP3/HLA-F/NOD2/IL18R1/JAG1/FUT7/HLA-DRA/FBXO38	30
BP	GO:0001909	leukocyte mediated cytotoxicity	32/982	124/18723	2.91666e-14	9.74422e-13	6.76982e-13	PTPRC/SH2D1A/IL18RAP/NCKAP1L/LILRB1/CORO1A/PRF1/CD1D/GZMB/CD226/SLAMF7/STAP1/KLRD1/IL7R/NCR3/CRTAM/LAG3/ARRB2/DNASE1L3/IL12RB1/FCGR2B/PTPN6/HLA-E/B2M/TYROBP/SERPINB9/IL12B/VAV1/RASGRP1/SPI1/HLA-F/HLA-DRA	32
BP	GO:0031294	lymphocyte costimulation	20/982	46/18723	3.13859e-14	1.04201e-12	7.2394e-13	CD3E/LCK/CCR7/LILRB2/LILRB4/CD5/CCL19/CD86/ICOS/CD40LG/PTPN6/CD28/TNFRSF14/TNFSF14/CCL21/DPP4/FYN/PDCD1LG2/VAV1/CSK	20
BP	GO:0019724	B cell mediated immunity	42/982	210/18723	4.50558e-14	1.48656e-12	1.03279e-12	PTPRC/CD27/BTK/CD226/TLR8/CR1/INPP5D/TBX21/BCL10/LTA/C1QA/HLA-DOB/CD40LG/FCGR2B/PTPN6/C1S/C1QB/HLA-E/CD28/FCER1G/SERPING1/B2M/PARP3/IL10/CR2/C1R/HLA-DMB/C3/FCER2/C7/HLA-DOA/FOXP3/TRAF3IP2/TNF/HLA-DPB1/HLA-DPA1/CCR6/HLA-DMA/NOD2/IL13RA2/IL27RA/HLA-DRA	42
BP	GO:0050729	positive regulation of inflammatory response	34/982	142/18723	5.02001e-14	1.64607e-12	1.14361e-12	IL16/TLR4/CCR7/PLCG2/BTK/PLA2G7/STAP1/PIK3CG/ZBP1/ITGA2/CCR2/IFNG/LTA/TLR7/HLA-E/CD28/IL33/JAK2/OSMR/PTGER4/ADAM8/GPSM3/SNCA/C3/CX3CL1/IL12B/ETS1/TNF/APP/FABP4/CEBPA/IL17RA/IL15/S100A8	34
BP	GO:0050731	positive regulation of peptidyl-tyrosine phosphorylation	40/982	193/18723	5.29046e-14	1.72411e-12	1.19783e-12	PTPRC/NCF1/CCL5/HCLS1/PECAM1/CD3E/PLCG2/STAP1/CD4/ACVR1/SEMA4D/EREG/ARRB2/ENPP2/IFNG/BMP6/BANK1/PTK2B/FLT3/IL24/TNFRSF14/SYK/CSF2/JAK2/NRP1/CD36/ADORA1/CSF1R/FYN/IL12B/PTPN1/TNF/NOD2/HSF1/ACE/IL15/FCGR1A/IQGAP1/ANGPT1/LRRK1	40
BP	GO:0002833	positive regulation of response to biotic stimulus	37/982	168/18723	6.42934e-14	2.08248e-12	1.44681e-12	CCL5/SH2D1A/IL18RAP/TLR4/PYHIN1/CD180/CD1D/PLCG2/CD226/KLRD1/TLR8/ZBP1/NCR3/EREG/CRTAM/LAG3/BMP6/HLA-E/SYK/HCK/LY86/ADAM8/FYN/TXK/TYROBP/FCN1/IL12B/VAV1/MNDA/RASGRP1/SPI1/LY96/HLA-F/NOD2/FPR2/PLA2G5/FBXO38	37
BP	GO:0002708	positive regulation of lymphocyte mediated immunity	30/982	113/18723	8.22908e-14	2.64926e-12	1.84058e-12	PTPRC/SLAMF1/SASH3/SH2D1A/IL18RAP/CD1D/BTK/CD226/KLRD1/NCR3/TBX21/CRTAM/LAG3/LTA/IL12RB1/HLA-E/CD28/B2M/C3/FCER2/IL12B/VAV1/RASGRP1/FOXP3/TNF/HLA-F/NOD2/IL18R1/HLA-DRA/FBXO38	30
BP	GO:0019882	antigen processing and presentation	29/982	106/18723	9.16415e-14	2.93253e-12	2.03738e-12	WAS/CD1D/CCR7/FGL2/LILRB2/CD8A/CTSS/CCL19/HLA-DOB/FCGR2B/HLA-E/FCER1G/B2M/CCL21/HLA-DMB/TAP1/RAB33A/RAB8B/HLA-DOA/CD209/HLA-F/HLA-DPB1/HLA-DPA1/HLA-DMA/NOD2/TAP2/ACE/HLA-DRA/TAPBPL	29
BP	GO:0045860	positive regulation of protein kinase activity	59/982	386/18723	1.11368e-13	3.54245e-12	2.46112e-12	PTPRC/NCF1/CCL5/NCKAP1L/TLR4/CCR7/LCP2/RASSF2/STAP1/CARD10/PIK3CG/CD4/CCL19/EREG/CD86/IFNG/STK4/SPRY2/PIK3R5/PTK2B/PDGFC/FLT3/TCL1A/FGD2/CCND2/SYK/JAK2/CCL21/LAT/ADORA1/ADAM8/CD300A/PHB/CSF1R/SNCA/IL12B/MAP2K6/CAB39/PTPN1/TRAF4/RASGRP1/FGF13/TNF/CDKN1B/TGFB2/CCDC88A/CSK/NOD2/RALB/TLR6/ACE/ADRB2/MAP3K13/FCGR1A/IQGAP1/ROBO1/CALCA/ANGPT1/AGAP2	59
BP	GO:1903557	positive regulation of tumor necrosis factor superfamily cytokine production	29/982	107/18723	1.19525e-13	3.77927e-12	2.62566e-12	PTPRC/SASH3/CD2/TLR4/PLCG2/CD84/CYBB/CCL19/CD86/BCL10/CCR2/IFNG/HLA-E/IL33/CD14/TNFRSF8/SYK/TLR1/JAK2/CD36/ADAM8/TYROBP/PTAFR/IL12B/RASGRP1/LY96/APP/SPN/NOD2	29
BP	GO:0002221	pattern recognition receptor signaling pathway	37/982	172/18723	1.39746e-13	4.3925e-12	3.0517e-12	IRF4/TLR4/PLCG2/BTK/NR1H3/TLR8/CTSS/GFI1/BCL10/ARRB2/CLEC4E/CYLD/TNFAIP3/IRF1/TLR7/SLC15A3/CD14/TNIP3/SEC14L1/TLR1/LILRA4/MAPKAPK3/CD36/CD300A/PHB/FCN1/MAP2K6/TRAF3/RNF125/LY96/NOD2/RPS6KA3/TRIL/TLR6/PTPN22/IRAK4/IRAK3	37
BP	GO:0002573	myeloid leukocyte differentiation	41/982	208/18723	1.50871e-13	4.71426e-12	3.27525e-12	EVI2B/IRF4/HCLS1/LILRB1/TLR4/CCR7/LILRB4/RASSF2/LILRB3/CD4/INPP5D/CCL19/CCR1/IFNG/EPHA2/MAFB/PIK3CD/ZFP36L1/CBFA2T3/ANXA2/CSF2/GPR183/SNX10/CSF1R/GPR137B/TYROBP/IL12B/OSTM1/CAMK4/SPI1/TNF/APP/CEBPA/MMP9/HSF1/IL15/FASN/CLDN18/RB1/EIF2AK1/LRRK1	41
BP	GO:0045089	positive regulation of innate immune response	32/982	131/18723	1.53515e-13	4.76883e-12	3.31316e-12	CCL5/SH2D1A/IL18RAP/TLR4/PYHIN1/CD1D/PLCG2/CD226/KLRD1/TLR8/ZBP1/NCR3/EREG/CRTAM/LAG3/HLA-E/SYK/HCK/ADAM8/FYN/TXK/TYROBP/FCN1/IL12B/VAV1/MNDA/RASGRP1/SPI1/HLA-F/NOD2/FPR2/PLA2G5	32
BP	GO:0045058	T cell selection	20/982	50/18723	2.15837e-13	6.66586e-12	4.63113e-12	PTPRC/LY9/DOCK2/IRF4/ZAP70/CD3E/CD3G/CD3D/CD1D/CCR7/BCL11B/CD4/TBX21/IL12RB1/CD28/SYK/IL12B/FOXP3/SPN/IL15	20
BP	GO:0002886	regulation of myeloid leukocyte mediated immunity	21/982	56/18723	2.46287e-13	7.56229e-12	5.25392e-12	BTK/STAP1/FGR/CD84/CCR2/DNASE1L3/FCGR2B/HMOX1/HLA-E/FOXF1/SYK/CD300A/TYROBP/C3/RAC2/PTAFR/ITGB2/SPI1/FER/IL13RA2/C12orf4	21
BP	GO:0002407	dendritic cell chemotaxis	15/982	26/18723	2.52734e-13	7.71566e-12	5.36048e-12	SLAMF1/CCL5/CCR7/CXCR4/PIK3CG/SLAMF8/CCL19/CCR2/CCR5/CCR1/CCL21/GPR183/SPI1/CCR6/CXCR2	15
BP	GO:0070372	regulation of ERK1 and ERK2 cascade	51/982	309/18723	2.63831e-13	8.00839e-12	5.56385e-12	PTPRC/SLAMF1/CCL5/TLR4/CCR7/APOE/DUSP6/CD4/CCL4/CCL19/CCR1/ARRB2/EPHA2/GPNMB/SPRY2/PTPN6/PTK2B/PDGFC/TEK/SYK/SIRPA/CCL21/NRP1/CD36/GPR183/GBP1/C5AR1/PHB/CSF1R/FBLN1/CCL18/CX3CL1/CCL8/CAMK2N1/PTPN1/RASGRP1/FGA/TNF/APP/CSK/NOD2/FPR2/LRP1/CCL11/PTPN22/NPTN/CCL2/PLA2G5/CCL17/THPO/ANGPT1	51
BP	GO:0070371	ERK1 and ERK2 cascade	53/982	330/18723	2.75128e-13	8.30386e-12	5.76913e-12	PTPRC/SLAMF1/CCL5/TLR4/CCR7/APOE/DUSP6/CD4/CCL4/CCL19/CCR1/ARRB2/EPHA2/GPNMB/SPRY2/PTPN6/PTK2B/PDGFC/ZFP36L1/TEK/SYK/SIRPA/CCL21/NRP1/CD36/GPR183/GBP1/PTGER4/C5AR1/PHB/CSF1R/FBLN1/CCL18/CX3CL1/CCL8/CAMK2N1/PTPN1/RASGRP1/FGA/TNF/APP/CSK/NOD2/FPR2/LRP1/CCL11/PTPN22/NPTN/CCL2/PLA2G5/CCL17/THPO/ANGPT1	53
BP	GO:0032612	interleukin-1 production	31/982	128/18723	4.7211e-13	1.4089e-11	9.7884e-12	IL16/CARD8/TLR4/PYHIN1/CCR7/LILRB4/TLR8/CCL19/ARRB2/IFNG/ACP5/TNFAIP3/SIRPA/JAK2/CASP1/CD36/ANXA1/IL10/TYROBP/P2RX7/CX3CL1/MNDA/MEFV/TNF/APP/NLRP1/SERPINB1/CD33/NOD2/TLR6/PML	31
BP	GO:0032652	regulation of interleukin-1 production	31/982	128/18723	4.7211e-13	1.4089e-11	9.7884e-12	IL16/CARD8/TLR4/PYHIN1/CCR7/LILRB4/TLR8/CCL19/ARRB2/IFNG/ACP5/TNFAIP3/SIRPA/JAK2/CASP1/CD36/ANXA1/IL10/TYROBP/P2RX7/CX3CL1/MNDA/MEFV/TNF/APP/NLRP1/SERPINB1/CD33/NOD2/TLR6/PML	31
BP	GO:0045582	positive regulation of T cell differentiation	26/982	91/18723	5.76229e-13	1.71002e-11	1.18804e-11	PTPRC/ZAP70/SASH3/NCKAP1L/CD27/RHOH/LILRB2/LILRB4/RUNX3/IL7R/CR1/CCL19/CD86/IFNG/IL12RB1/SYK/ANXA1/ADAM8/HLX/IL12B/RASGRP1/FOXP3/IL2RA/CD83/HLA-DRA/SOX4	26
BP	GO:0070374	positive regulation of ERK1 and ERK2 cascade	41/982	217/18723	6.55865e-13	1.93553e-11	1.34472e-11	PTPRC/SLAMF1/CCL5/TLR4/CCR7/APOE/CD4/CCL4/CCL19/CCR1/ARRB2/GPNMB/SPRY2/PTK2B/PDGFC/TEK/CCL21/NRP1/CD36/GPR183/C5AR1/PHB/CSF1R/CCL18/CX3CL1/CCL8/RASGRP1/FGA/TNF/APP/NOD2/FPR2/LRP1/CCL11/PTPN22/NPTN/CCL2/PLA2G5/CCL17/THPO/ANGPT1	41
BP	GO:0001774	microglial cell activation	19/982	47/18723	6.87329e-13	2.01718e-11	1.40144e-11	PTPRC/STAP1/IFNG/C1QA/TLR1/CST7/JAK2/AIF1/C5AR1/SYT11/TYROBP/SNCA/CX3CL1/IFNGR2/ITGB2/TNF/APP/TLR6/FPR2	19
BP	GO:0006959	humoral immune response	51/982	317/18723	7.29072e-13	2.12793e-11	1.47838e-11	PTPRC/SH2D1A/MS4A1/CCR7/CXCL13/CR1/CXCL9/CCR2/BLNK/CFP/IFNG/LTA/C1QA/FCGR2B/PTPN6/C1S/C1QB/EBI3/HLA-E/CD28/SERPING1/RNASE6/GNLY/CXCL10/LYZ/GPR183/A2M/PHB/CR2/C1R/C3/CD59/FCN1/FCER2/C7/CXCL11/FGA/TRAF3IP2/RARRES2/TNF/MFAP4/SFTPD/PSMB10/CCR6/VSIG4/NOD2/CFD/BST1/CCL2/CD83/CFB	51
BP	GO:0002709	regulation of T cell mediated immunity	25/982	85/18723	7.79437e-13	2.2625e-11	1.57188e-11	PTPRC/WAS/SLAMF1/TNFRSF1B/SASH3/NCKAP1L/LILRB1/CD1D/LILRB4/KLRD1/IL7R/TBX21/CCR2/IL12RB1/FCGR2B/HLA-E/B2M/IL12B/FOXP3/HLA-F/NOD2/IL18R1/FUT7/HLA-DRA/FBXO38	25
BP	GO:0002707	negative regulation of lymphocyte mediated immunity	20/982	53/18723	7.97381e-13	2.302e-11	1.59932e-11	PTPRC/SLAMF1/NCKAP1L/LILRB1/LILRB4/KLRD1/IL7R/CR1/CD96/TBX21/ARRB2/FCGR2B/PTPN6/HLA-E/PARP3/CR2/SERPINB9/FOXP3/HLA-F/NOD2	20
BP	GO:0071356	cellular response to tumor necrosis factor	42/982	229/18723	9.68314e-13	2.78037e-11	1.93167e-11	TNFRSF1B/CCL5/CARD8/TNFRSF17/LAPTM5/CCL4/CCL19/IL18BP/PTK2B/CYLD/TNFAIP3/TCL1A/ZFP36L1/TNFRSF14/SYK/JAK2/CCL21/CASP1/GBP1/STAT1/TNFRSF4/CD58/CCL18/CX3CL1/CCL8/TRAF3/VCAM1/KLF2/SHARPIN/CLDN1/TRAF3IP2/TNF/FABP4/RORA/CEBPA/PPARGC1A/CCL11/CCL2/CCL17/CALCA/CLDN18/CRHBP	42
BP	GO:0032715	negative regulation of interleukin-6 production	22/982	66/18723	1.08681e-12	3.10384e-11	2.1564e-11	SLAMF1/NCKAP1L/TLR4/LILRB4/CD84/INPP5D/ARRB2/BANK1/PTPN6/TNFAIP3/SIRPA/CD200/IL10/SYT11/CX3CL1/FOXP3/KLF2/TNF/CSK/IL27RA/PTPN22/IRAK3	22
BP	GO:0002690	positive regulation of leukocyte chemotaxis	26/982	94/18723	1.32499e-12	3.76382e-11	2.61492e-11	SLAMF1/CCL5/NCKAP1L/CCR7/CXCL13/PLA2G7/CMKLR1/CCL4/CCL19/CCR2/CCR1/PTK2B/CXCL12/CXCL10/CCL21/AIF1/C5AR1/CSF1R/GPSM3/C3AR1/RAC2/SPI1/RARRES2/CCR6/CXCR2/FPR2	26
BP	GO:0050921	positive regulation of chemotaxis	32/982	141/18723	1.34152e-12	3.7905e-11	2.63346e-11	IL16/SLAMF1/MET/CCL5/NCKAP1L/CCR7/CXCL13/PLA2G7/CMKLR1/S1PR1/CXCR4/ITGA2/CCL4/CCL19/CCR2/CCR1/PTK2B/CXCL12/CXCL10/CCL21/AIF1/NRP1/C5AR1/CSF1R/GPSM3/C3AR1/RAC2/SPI1/RARRES2/CCR6/CXCR2/FPR2	32
BP	GO:0048872	homeostasis of number of cells	46/982	272/18723	1.63341e-12	4.59082e-11	3.18949e-11	IKZF1/SASH3/HCLS1/NCKAP1L/CORO1A/PDE4B/SIT1/TNFRSF17/CCR7/RASSF2/IL7R/INPP5D/BCL10/CCR2/MAFB/HMOX1/PIK3CD/TNFAIP3/FLT3/ZFP36L1/B2M/SH2B3/DOCK10/TNFSF14/JAK2/GPR183/LAT/ANXA1/JAK3/STAT1/LIPA/MYCT1/ETS1/BPGM/FOXP3/KLF2/EMCN/SPI1/TRAF3IP2/IL2RA/CXCR2/HOXA5/TGFBR3/NLE1/RB1/SOX4	46
BP	GO:0042060	wound healing	60/982	422/18723	1.69082e-12	4.72718e-11	3.28422e-11	WAS/DCBLD2/TLR4/LCK/PRKCQ/PLEK/PLCG2/P2RX1/CXCR4/PIK3CG/APOE/ITGA2/EREG/TNC/CD40LG/HMOX1/PTPN6/TNFAIP3/ENTPD1/ANXA6/TSPAN32/IL24/FCER1G/SERPING1/PLAT/SH2B3/SYK/HPS5/ANXA2/PPP3CA/JAK2/ACVRL1/MYOF/CD36/ANXA1/SYT11/TXK/FBLN1/MMRN1/PLAU/CD59/CDH3/PRCP/CX3CL1/ETS1/VAV1/ELK3/DST/FGA/CLDN1/TNF/DCN/TGFB2/FLNA/CD34/GNA12/PROCR/C1QTNF1/TFPI/S100A8	60
BP	GO:0032611	interleukin-1 beta production	28/982	110/18723	1.71509e-12	4.74507e-11	3.29665e-11	CARD8/TLR4/PYHIN1/CCR7/LILRB4/TLR8/CCL19/ARRB2/IFNG/ACP5/TNFAIP3/SIRPA/JAK2/CASP1/CD36/TYROBP/P2RX7/CX3CL1/MNDA/MEFV/TNF/APP/NLRP1/SERPINB1/CD33/NOD2/TLR6/PML	28
BP	GO:0032651	regulation of interleukin-1 beta production	28/982	110/18723	1.71509e-12	4.74507e-11	3.29665e-11	CARD8/TLR4/PYHIN1/CCR7/LILRB4/TLR8/CCL19/ARRB2/IFNG/ACP5/TNFAIP3/SIRPA/JAK2/CASP1/CD36/TYROBP/P2RX7/CX3CL1/MNDA/MEFV/TNF/APP/NLRP1/SERPINB1/CD33/NOD2/TLR6/PML	28
BP	GO:0050869	negative regulation of B cell activation	16/982	34/18723	2.62658e-12	7.22923e-11	5.02253e-11	BTK/SAMSN1/LAPTM5/CR1/INPP5D/BANK1/CTLA4/FCGR2B/TNFAIP3/PARP3/CD300A/IL10/TYROBP/ATM/MNDA/FOXP3	16
BP	GO:0001912	positive regulation of leukocyte mediated cytotoxicity	20/982	56/18723	2.66375e-12	7.29373e-11	5.06734e-11	PTPRC/SH2D1A/IL18RAP/CD1D/CD226/STAP1/KLRD1/NCR3/CRTAM/LAG3/IL12RB1/HLA-E/B2M/TYROBP/IL12B/VAV1/RASGRP1/SPI1/HLA-F/HLA-DRA	20
BP	GO:0043367	CD4-positive, alpha-beta T cell differentiation	24/982	83/18723	3.36958e-12	9.17908e-11	6.37719e-11	PLA2G2D/LY9/IRF4/SASH3/NCKAP1L/RUNX3/CCL19/TBX21/CD86/IFNG/IL12RB1/GPR183/ANXA1/PTGER4/JAK3/HLX/IL12B/FOXP3/RORA/SPN/IL18R1/CD83/FUT7/HLA-DRA	24
BP	GO:0002224	toll-like receptor signaling pathway	29/982	121/18723	3.54285e-12	9.60185e-11	6.67091e-11	IRF4/TLR4/PLCG2/BTK/NR1H3/TLR8/CTSS/GFI1/BCL10/ARRB2/TNFAIP3/IRF1/TLR7/CD14/TNIP3/TLR1/LILRA4/MAPKAPK3/CD36/CD300A/TRAF3/LY96/NOD2/RPS6KA3/TRIL/TLR6/PTPN22/IRAK4/IRAK3	29
BP	GO:0002286	T cell activation involved in immune response	28/982	114/18723	4.40469e-12	1.1877e-10	8.25159e-11	LY9/IRF4/ITGAL/NCKAP1L/LILRB1/FGL2/APBB1IP/CCL19/TBX21/CD86/LCP1/IFNG/IL12RB1/FCGR2B/FCER1G/GPR183/ANXA1/PTGER4/JAK3/HLA-DMB/LGALS3/HLX/IL12B/FOXP3/RORA/SPN/IL18R1/HLA-DRA	28
BP	GO:1902622	regulation of neutrophil migration	17/982	41/18723	6.90112e-12	1.85145e-10	1.2863e-10	NCKAP1L/RHOH/CCR7/SLAMF8/CCL19/CCL21/MPP1/ADAM8/DPP4/C5AR1/C3AR1/RAC2/NOD2/BST1/RHOG/CXCR2/FUT7	17
BP	GO:0050728	negative regulation of inflammatory response	35/982	176/18723	7.03333e-12	1.87744e-10	1.30436e-10	NT5E/PTPRC/TNFRSF1B/AOAH/NR1H3/APOE/FGR/SLAMF8/ACP5/CALCRL/FCGR2B/TNFAIP3/TEK/FOXF1/SYK/CST7/SIRPA/CD200/HCK/PTGIS/ADORA1/PTGER4/FYN/IL10/SYT11/CX3CL1/IL12B/MEFV/FOXP3/SHARPIN/RORA/IL2RA/NOD2/FPR2/RB1	35
BP	GO:0034612	response to tumor necrosis factor	43/982	253/18723	7.38402e-12	1.9612e-10	1.36255e-10	TNFRSF1B/CCL5/CARD8/TNFRSF17/LAPTM5/CCL4/CCL19/IL18BP/PTK2B/CYLD/TNFAIP3/TCL1A/ZFP36L1/TNFRSF14/CD14/SYK/JAK2/CCL21/CASP1/GBP1/STAT1/TNFRSF4/CD58/CCL18/CX3CL1/CCL8/TRAF3/VCAM1/KLF2/SHARPIN/CLDN1/TRAF3IP2/TNF/FABP4/RORA/CEBPA/PPARGC1A/CCL11/CCL2/CCL17/CALCA/CLDN18/CRHBP	43
BP	GO:0002820	negative regulation of adaptive immune response	20/982	59/18723	8.15358e-12	2.15482e-10	1.49706e-10	PTPRC/SLAMF1/NCKAP1L/LILRB1/LILRB4/KLRD1/SAMSN1/IL7R/CR1/TBX21/FCGR2B/PTPN6/TNFRSF14/PARP3/JAK3/CR2/FOXP3/HLA-F/NOD2/IL27RA	20
BP	GO:0043301	negative regulation of leukocyte degranulation	10/982	12/18723	9.03598e-12	2.37619e-10	1.65087e-10	NCKAP1L/CD84/CCR2/FCGR2B/HMOX1/FOXF1/CD300A/SPI1/HLA-F/IL13RA2	10
BP	GO:0002719	negative regulation of cytokine production involved in immune response	14/982	27/18723	1.15119e-11	3.01239e-10	2.09286e-10	SLAMF1/LILRB1/LILRB4/CD96/TBX21/HMOX1/JAK3/IL10/FOXP3/TNF/HLA-F/TGFB2/IRAK3/ANGPT1	14
BP	GO:0031663	lipopolysaccharide-mediated signaling pathway	20/982	60/18723	1.1633e-11	3.02915e-10	2.10451e-10	CD6/CCL5/CARD8/TLR4/CD180/PLCG2/BCL10/BMP6/TNFAIP3/CD14/HCK/CD36/LY86/CX3CL1/PTAFR/SPI1/LY96/TNF/PTPN22/CCL2	20
BP	GO:0046718	viral entry into host cell	31/982	144/18723	1.30592e-11	3.37769e-10	2.34666e-10	SLAMF1/ITGB7/CXCR4/ITGA2/CR1/CD4/SELPLG/CD86/CCR5/EPHA2/EFNB2/SIGLEC1/TNFRSF14/NRP1/DPP4/PHB/CR2/TNFRSF4/ITGB5/FCN1/CIITA/LY6E/TRIM22/CD209/CLDN1/CAV2/CTSB/UVRAG/SCARB2/GSN/SIVA1	31
BP	GO:0032760	positive regulation of tumor necrosis factor production	26/982	103/18723	1.30987e-11	3.37769e-10	2.34666e-10	PTPRC/SASH3/CD2/TLR4/PLCG2/CD84/CYBB/CCL19/CCR2/IFNG/HLA-E/IL33/CD14/TNFRSF8/SYK/TLR1/JAK2/CD36/TYROBP/PTAFR/IL12B/RASGRP1/LY96/APP/SPN/NOD2	26
BP	GO:0032695	negative regulation of interleukin-12 production	12/982	19/18723	1.45355e-11	3.73008e-10	2.59148e-10	SLAMF1/LILRB1/CCR7/CMKLR1/TLR8/ARRB2/ACP5/JAK3/IL10/MEFV/NOD2/IRAK3	12
BP	GO:2000401	regulation of lymphocyte migration	20/982	61/18723	1.64625e-11	4.20426e-10	2.92092e-10	CCL5/CXCL13/CCL4/STK10/CCR2/PTK2B/TNFRSF14/CXCL12/JAM2/ITGA4/CD200/CXCL10/CCL21/AIF1/ADAM8/APP/CCR6/SPN/IL27RA/CCL2	20
BP	GO:0002821	positive regulation of adaptive immune response	27/982	112/18723	1.69902e-11	4.31828e-10	3.00013e-10	PTPRC/SLAMF1/SASH3/PRKCQ/CD1D/BTK/CD226/CD4/TBX21/CCR2/LTA/IL12RB1/HLA-E/CD28/B2M/C3/SKAP1/FCER2/IL12B/FOXP3/TNF/HLA-F/NOD2/IL18R1/IL27RA/HLA-DRA/FBXO38	27
BP	GO:0002861	regulation of inflammatory response to antigenic stimulus	17/982	43/18723	1.73567e-11	4.39042e-10	3.05026e-10	PLA2G2D/CCR7/BTK/FGR/LTA/FCGR2B/HLA-E/CD28/SYK/HCK/FYN/IL10/C3/IL12B/TNF/NOD2/FUT7	17
BP	GO:0009615	response to virus	53/982	367/18723	1.8957e-11	4.7725e-10	3.31571e-10	PTPRC/CCL5/CARD8/LILRB1/PRF1/FGL2/CXCR4/TLR8/ZBP1/FGR/CCL4/CCL19/TBX21/CXCL9/SAMHD1/IFNG/IL12RB1/APOBEC3G/ITGAX/TNFAIP3/IRF1/TLR7/TSPAN32/CXCL12/RNASE6/SEC14L1/CXCL10/GBP1/PHB/STAT1/MAP3K14/CCL8/IFNGR2/IL12B/TRAF3/RNF125/TRIM22/FOXP3/TRAF3IP2/TNF/AKAP1/NLRP1/CD207/MUL1/IRF5/BCL2L1/IL17RA/CCL11/PTPN22/IL15/IRAK3/PML/APOBEC3F	53
BP	GO:0007249	I-kappaB kinase/NF-kappaB signaling	45/982	281/18723	1.95394e-11	4.89592e-10	3.40145e-10	PRKCB/CARD8/RHOH/TLR4/CCR7/PLCG2/BTK/LILRB4/TLR8/CD4/FASLG/APOL3/CCL19/BCL10/HMOX1/TNFAIP3/TLR7/TNIP3/SIRPA/CCL21/CASP1/CD36/FYN/STAT1/MAP3K14/CX3CL1/TRAF3/TRAF4/TRIM22/SHARPIN/MAP3K3/TRAF3IP2/TNF/OPTN/WLS/RORA/MUL1/FLNA/NOD2/TLR6/ROR1/CASP10/LITAF/IRAK4/ANGPT1	45
BP	GO:0045576	mast cell activation	20/982	62/18723	2.31151e-11	5.76467e-10	4.00502e-10	RHOH/BTK/LCP2/CD226/PTGDS/PIK3CG/FGR/CD84/PTGDR/HMOX1/PIK3CD/FOXF1/SYK/LAT/CD300A/RAC2/RASGRP1/FER/IL13RA2/C12orf4	20
BP	GO:0036336	dendritic cell migration	15/982	33/18723	2.39817e-11	5.95285e-10	4.13576e-10	SLAMF1/CCL5/CCR7/CXCR4/PIK3CG/SLAMF8/CCL19/CCR2/CCR5/CCR1/CCL21/GPR183/SPI1/CCR6/CXCR2	15
BP	GO:0071887	leukocyte apoptotic process	26/982	106/18723	2.64439e-11	6.53348e-10	4.53916e-10	CCL5/HCLS1/CD27/LILRB1/CD3G/PRKCQ/CCR7/BTK/PLEKHO2/IL7R/FASLG/CCL19/BCL10/PIK3CD/CXCL12/IDO1/CCL21/ANXA1/ADAM8/JAK3/IL10/LGALS3/TRAF3IP2/IL2RA/NOD2/CXCR2	26
BP	GO:0002448	mast cell mediated immunity	18/982	50/18723	2.83614e-11	6.9748e-10	4.84576e-10	BTK/PTGDS/PIK3CG/FGR/CD84/PTGDR/HMOX1/PIK3CD/FOXF1/SYK/LAT/CD300A/SERPINB9/RAC2/RASGRP1/FER/IL13RA2/C12orf4	18
BP	GO:0042100	B cell proliferation	25/982	99/18723	3.21013e-11	7.85815e-10	5.45947e-10	PTPRC/SASH3/MS4A1/NCKAP1L/TLR4/CD180/BTK/CD22/IL7R/PLCL2/INPP5D/CD40LG/CTLA4/FCGR2B/IKZF3/GPR183/CD300A/IL10/CR2/TNFRSF4/TYROBP/ATM/MNDA/RASGRP1/BST1	25
BP	GO:0002824	positive regulation of adaptive immune response based on somatic recombination of immune receptors built from immunoglobulin superfamily domains	26/982	107/18723	3.32164e-11	8.09383e-10	5.62321e-10	PTPRC/SLAMF1/SASH3/PRKCQ/CD1D/BTK/CD226/CD4/TBX21/CCR2/LTA/IL12RB1/HLA-E/CD28/B2M/C3/FCER2/IL12B/FOXP3/TNF/HLA-F/NOD2/IL18R1/IL27RA/HLA-DRA/FBXO38	26
BP	GO:0002548	monocyte chemotaxis	21/982	70/18723	3.49283e-11	8.47211e-10	5.88602e-10	CCL5/PLA2G7/SLAMF8/CCL4/CCL19/CCR2/CCR1/CXCL12/CXCL10/CCL21/AIF1/ANXA1/CCL18/LGALS3/CX3CL1/CCL8/FPR2/CCL11/CCL2/CCL17/CALCA	21
BP	GO:0002920	regulation of humoral immune response	17/982	45/18723	4.11497e-11	9.93577e-10	6.9029e-10	PTPRC/CCR7/CXCL13/CR1/LTA/FCGR2B/PTPN6/SERPING1/A2M/PHB/CR2/C3/CD59/FCER2/TNF/VSIG4/NOD2	17
BP	GO:0048247	lymphocyte chemotaxis	20/982	64/18723	4.45674e-11	1.07123e-09	7.4424e-10	CCL5/CXCL13/CXCR3/PIK3CG/CCL4/CCL19/CCR2/PTK2B/PIK3CD/CXCL10/CCL21/GPR183/ADAM8/CCL18/CX3CL1/CCL8/CXCL11/CCL11/CCL2/CCL17	20
BP	GO:0044409	entry into host	31/982	151/18723	4.75489e-11	1.13775e-09	7.90452e-10	SLAMF1/ITGB7/CXCR4/ITGA2/CR1/CD4/SELPLG/CD86/CCR5/EPHA2/EFNB2/SIGLEC1/TNFRSF14/NRP1/DPP4/PHB/CR2/TNFRSF4/ITGB5/FCN1/CIITA/LY6E/TRIM22/CD209/CLDN1/CAV2/CTSB/UVRAG/SCARB2/GSN/SIVA1	31
BP	GO:0043300	regulation of leukocyte degranulation	17/982	46/18723	6.21024e-11	1.47932e-09	1.02776e-09	NCKAP1L/FGR/CD84/CCR2/FCGR2B/HMOX1/FOXF1/SYK/CD300A/RAC2/PTAFR/ITGB2/SPI1/HLA-F/FER/IL13RA2/C12orf4	17
BP	GO:0043122	regulation of I-kappaB kinase/NF-kappaB signaling	41/982	249/18723	6.34893e-11	1.5056e-09	1.04602e-09	PRKCB/CARD8/RHOH/TLR4/CCR7/PLCG2/LILRB4/CD4/FASLG/APOL3/CCL19/BCL10/HMOX1/TNFAIP3/TNIP3/CCL21/CASP1/CD36/FYN/STAT1/MAP3K14/CX3CL1/TRAF3/TRAF4/TRIM22/SHARPIN/MAP3K3/TRAF3IP2/TNF/OPTN/WLS/RORA/MUL1/FLNA/NOD2/TLR6/ROR1/CASP10/LITAF/IRAK4/ANGPT1	41
BP	GO:0035710	CD4-positive, alpha-beta T cell activation	25/982	102/18723	6.47914e-11	1.52965e-09	1.06273e-09	PLA2G2D/LY9/IRF4/SASH3/NCKAP1L/PRKCQ/RUNX3/CCL19/TBX21/CD86/IFNG/IL12RB1/GPR183/ANXA1/PTGER4/JAK3/HLX/IL12B/FOXP3/RORA/SPN/IL18R1/CD83/FUT7/HLA-DRA	25
BP	GO:2000403	positive regulation of lymphocyte migration	15/982	35/18723	6.80189e-11	1.59875e-09	1.11073e-09	CCL5/CXCL13/CCL4/CCR2/PTK2B/TNFRSF14/CXCL12/JAM2/ITGA4/CXCL10/CCL21/AIF1/ADAM8/APP/SPN	15
BP	GO:0050858	negative regulation of antigen receptor-mediated signaling pathway	14/982	30/18723	7.19733e-11	1.68424e-09	1.17013e-09	SH2D1A/LPXN/LILRB4/UBASH3A/LAPTM5/CD22/PLCL2/FCGR2B/PTPN6/PVRIG/GBP1/CD300A/LGALS3/PTPN22	14
BP	GO:0071900	regulation of protein serine/threonine kinase activity	51/982	359/18723	8.40258e-11	1.95765e-09	1.36009e-09	LAX1/TLR4/PIK3CG/APOE/CCL19/IFNG/STK4/HHEX/SPRY2/PIK3R5/PTPN6/PTK2B/PDGFC/TNFAIP3/FLT3/TCL1A/FGD2/CCND2/HEG1/GADD45A/SH2B3/SYK/ADAM8/CD300A/CSF1R/SNCA/MAP2K6/CAB39/KAT2B/PTPN1/RASGRP1/KSR1/TNF/DUSP7/CDKN1B/BLM/CCNG2/CEBPA/CSK/NOD2/RALB/LRP5/TLR6/ADRB2/PTPN22/MAP3K13/UVRAG/IRAK3/IQGAP1/ROBO1/RB1	51
BP	GO:0048017	inositol lipid-mediated signaling	34/982	182/18723	8.46178e-11	1.96284e-09	1.36369e-09	NCF1/PPP1R16B/CCL5/HCLS1/PIK3CG/FGR/PLCL2/SEMA4D/PIK3R5/PTPN6/PIK3CD/PDGFC/FLT3/ZFP36L1/CD28/TEK/JAK2/PLCB2/CSF1R/FYN/PTAFR/RASGRP1/TNF/DCN/TGFB2/PIK3IP1/PLCL1/MYO16/ADAP2/CAT/ROR1/PIK3C2B/NEDD4/ANGPT1	34
BP	GO:0032735	positive regulation of interleukin-12 production	16/982	41/18723	8.67634e-11	1.99518e-09	1.38616e-09	IL16/IRF8/TLR4/CCR7/PLCG2/LAPTM5/CCL19/IFNG/CD40LG/IRF1/LTB/SYK/CD36/IL12B/IRF5/NOD2	16
BP	GO:0050856	regulation of T cell receptor signaling pathway	16/982	41/18723	8.67634e-11	1.99518e-09	1.38616e-09	SH2D1A/TRAT1/LCK/CCR7/CD226/LILRB4/UBASH3A/LAPTM5/KCNN4/BCL10/PTPN6/PVRIG/GBP1/CD300A/LGALS3/PTPN22	16
BP	GO:0019722	calcium-mediated signaling	36/982	202/18723	9.5479e-11	2.18614e-09	1.51883e-09	PTPRC/CXCR6/ZAP70/CD3E/TRAT1/PLEK/CCR7/PLCG2/BTK/CXCR3/CMKLR1/CXCR4/CXCR5/CD22/CD4/CCL4/CCR2/CCR5/CCR1/PTK2B/SYK/PPP3CA/LAT/GBP1/EDNRB/P2RX7/VCAM1/NFATC1/ITPR1/TNF/CCR6/MCOLN1/CCRL2/BST1/CXCR2/FPR2	36
BP	GO:2000106	regulation of leukocyte apoptotic process	22/982	81/18723	1.04489e-10	2.3786e-09	1.65254e-09	CCL5/HCLS1/CD27/LILRB1/CD3G/PRKCQ/CCR7/BTK/IL7R/CCL19/BCL10/PIK3CD/CXCL12/IDO1/CCL21/ANXA1/ADAM8/JAK3/IL10/LGALS3/NOD2/CXCR2	22
BP	GO:0002712	regulation of B cell mediated immunity	19/982	60/18723	1.05228e-10	2.3786e-09	1.65254e-09	PTPRC/BTK/CD226/CR1/TBX21/LTA/FCGR2B/PTPN6/HLA-E/CD28/PARP3/IL10/CR2/C3/FCER2/FOXP3/TNF/NOD2/IL27RA	19
BP	GO:0002889	regulation of immunoglobulin mediated immune response	19/982	60/18723	1.05228e-10	2.3786e-09	1.65254e-09	PTPRC/BTK/CD226/CR1/TBX21/LTA/FCGR2B/PTPN6/HLA-E/CD28/PARP3/IL10/CR2/C3/FCER2/FOXP3/TNF/NOD2/IL27RA	19
BP	GO:0042119	neutrophil activation	15/982	36/18723	1.10972e-10	2.4978e-09	1.73535e-09	CCL5/IL18RAP/DNASE1L3/FCGR2B/FCER1G/SYK/ANXA3/CD300A/TYROBP/PTAFR/ITGB2/SPI1/TRAF3IP2/CXCR2/IL15	15
BP	GO:0002437	inflammatory response to antigenic stimulus	21/982	74/18723	1.12317e-10	2.51742e-09	1.74898e-09	CD6/PLA2G2D/CCR7/BTK/FGR/LTA/FCGR2B/HLA-E/CD28/SYK/HCK/FYN/IL10/C3/IL12B/RASGRP1/TNF/IL2RA/NOD2/CXCR2/FUT7	21
BP	GO:0048771	tissue remodeling	33/982	175/18723	1.23719e-10	2.76133e-09	1.91844e-09	RASSF2/S1PR1/INPP5D/CCR2/ACP5/EPHA2/GPNMB/PTK2B/SEMA3C/TNFAIP3/SYK/PPP3CA/ACVRL1/SNX10/ADAM8/CSF1R/GPR137B/P2RX7/LIPA/RAC2/IL12B/TIE1/CSK/FLNA/LRP5/JAG1/ACE/ADRB2/IL15/PLEKHM1/CALCA/CLDN18/LRRK1	33
BP	GO:0002823	negative regulation of adaptive immune response based on somatic recombination of immune receptors built from immunoglobulin superfamily domains	18/982	54/18723	1.24727e-10	2.77218e-09	1.92598e-09	PTPRC/SLAMF1/NCKAP1L/LILRB1/LILRB4/KLRD1/IL7R/CR1/TBX21/FCGR2B/PTPN6/PARP3/JAK3/CR2/FOXP3/HLA-F/NOD2/IL27RA	18
BP	GO:0002312	B cell activation involved in immune response	22/982	82/18723	1.35815e-10	3.00593e-09	2.08837e-09	PTPRC/IRF8/TLR4/CD180/PLCG2/MFNG/ITM2A/CR1/PLCL2/TBX21/CD40LG/FCGR2B/PTK2B/CD28/DOCK10/PARP3/GPR183/IL10/FOXP3/SPI1/CCR6/IL27RA	22
BP	GO:0043303	mast cell degranulation	17/982	48/18723	1.36376e-10	3.00593e-09	2.08837e-09	BTK/PTGDS/PIK3CG/FGR/CD84/PTGDR/HMOX1/PIK3CD/FOXF1/SYK/LAT/CD300A/RAC2/RASGRP1/FER/IL13RA2/C12orf4	17
BP	GO:0046637	regulation of alpha-beta T cell differentiation	20/982	68/18723	1.52692e-10	3.35166e-09	2.32857e-09	IRF4/ZAP70/SASH3/NCKAP1L/PRDM1/LILRB4/RUNX3/CCL19/TBX21/CD86/IFNG/IL12RB1/SYK/ANXA1/JAK3/HLX/IL12B/FOXP3/CD83/HLA-DRA	20
BP	GO:1905517	macrophage migration	18/982	55/18723	1.76387e-10	3.85583e-09	2.67885e-09	SLAMF1/CCL5/CMKLR1/STAP1/SLAMF8/CCR2/PTK2B/CD200/EDNRB/C5AR1/CSF1R/LGALS3/C3AR1/CX3CL1/MMP28/RARRES2/SFTPD/CCL2	18
BP	GO:0032720	negative regulation of tumor necrosis factor production	21/982	76/18723	1.95005e-10	4.24535e-09	2.94947e-09	SLAMF1/GPR18/LILRB1/TLR4/ARRB2/ACP5/GPNMB/PTPN6/TNFAIP3/SIRPA/LILRA4/IL10/SYT11/CX3CL1/FOXP3/CD33/CD34/NOD2/IL27RA/PTPN22/IRAK3	21
BP	GO:0048015	phosphatidylinositol-mediated signaling	33/982	178/18723	1.97459e-10	4.28124e-09	2.9744e-09	NCF1/PPP1R16B/CCL5/HCLS1/PIK3CG/FGR/PLCL2/SEMA4D/PIK3R5/PTPN6/PIK3CD/PDGFC/FLT3/ZFP36L1/CD28/TEK/JAK2/PLCB2/CSF1R/FYN/PTAFR/RASGRP1/TNF/DCN/TGFB2/PIK3IP1/PLCL1/MYO16/CAT/ROR1/PIK3C2B/NEDD4/ANGPT1	33
BP	GO:0002279	mast cell activation involved in immune response	17/982	49/18723	1.98689e-10	4.29039e-09	2.98076e-09	BTK/PTGDS/PIK3CG/FGR/CD84/PTGDR/HMOX1/PIK3CD/FOXF1/SYK/LAT/CD300A/RAC2/RASGRP1/FER/IL13RA2/C12orf4	17
BP	GO:0036230	granulocyte activation	16/982	43/18723	2.02116e-10	4.34672e-09	3.01989e-09	CCL5/IL18RAP/CCR2/DNASE1L3/FCGR2B/FCER1G/SYK/ANXA3/CD300A/TYROBP/PTAFR/ITGB2/SPI1/TRAF3IP2/CXCR2/IL15	16
BP	GO:0032703	negative regulation of interleukin-2 production	13/982	27/18723	2.12224e-10	4.54571e-09	3.15814e-09	PTPRC/LILRB4/LAPTM5/CR1/TBX21/LAG3/TNFAIP3/GBP1/FOXP3/SFTPD/VSIG4/CD34/NOD2	13
BP	GO:0043087	regulation of GTPase activity	49/982	348/18723	2.70639e-10	5.77364e-09	4.01125e-09	ARHGAP25/MET/CCL5/GPR65/CCR7/CXCL13/S1PR1/RASGRP3/RASGRP2/SEMA4D/CCL4/CCL19/ARRB2/EPHA2/RASA1/SPRY2/PTK2B/FGD2/PLXNC1/BCAR3/DOCK10/ADPRH/CCL21/GPR137B/S100A10/TBC1D9/RGS1/CCL18/CX3CL1/CCL8/VAV1/RASGRP1/IQGAP2/CAV2/GMIP/ADAP2/RHOG/RASA3/CCL11/CCL2/TBC1D4/GRTP1/IQGAP1/STMN3/CHN1/CCL17/ABR/TBC1D2B/SH3BP1	49
BP	GO:0048246	macrophage chemotaxis	15/982	38/18723	2.7929e-10	5.93435e-09	4.12291e-09	SLAMF1/CCL5/CMKLR1/STAP1/SLAMF8/PTK2B/EDNRB/C5AR1/CSF1R/LGALS3/C3AR1/MMP28/RARRES2/SFTPD/CCL2	15
BP	GO:0072677	eosinophil migration	12/982	23/18723	3.20709e-10	6.78727e-09	4.71548e-09	CCL5/CCL4/CCL21/PTGER4/ADAM8/CD300A/HRH1/LGALS3/CX3CL1/CCL8/CCL11/CCL2	12
BP	GO:1903556	negative regulation of tumor necrosis factor superfamily cytokine production	21/982	78/18723	3.31939e-10	6.99706e-09	4.86122e-09	SLAMF1/GPR18/LILRB1/TLR4/ARRB2/ACP5/GPNMB/PTPN6/TNFAIP3/SIRPA/LILRA4/IL10/SYT11/CX3CL1/FOXP3/CD33/CD34/NOD2/IL27RA/PTPN22/IRAK3	21
BP	GO:0002228	natural killer cell mediated immunity	20/982	71/18723	3.6067e-10	7.57265e-09	5.26112e-09	SH2D1A/IL18RAP/LILRB1/CORO1A/GZMB/CD226/SLAMF7/KLRD1/NCR3/CD96/CRTAM/LAG3/ARRB2/PTPN6/HLA-E/SERPINB9/IL12B/VAV1/RASGRP1/HLA-F	20
BP	GO:0007599	hemostasis	37/982	222/18723	3.82344e-10	7.99611e-09	5.55532e-09	WAS/FLI1/TLR4/LCK/PRKCQ/PLEK/PLCG2/P2RX1/PIK3CG/APOE/ITGA2/CD40LG/PTPN6/ENTPD1/TSPAN32/FCER1G/SERPING1/PLAT/SH2B3/SYK/HPS5/ANXA2/JAK2/CD36/TXK/FBLN1/MMRN1/PLAU/CD59/VAV1/FGA/FLNA/CD34/GNA12/PROCR/C1QTNF1/TFPI	37
BP	GO:0071622	regulation of granulocyte chemotaxis	17/982	51/18723	4.08802e-10	8.5159e-09	5.91644e-09	SLAMF1/CCL5/NCKAP1L/CCR7/CMKLR1/CCL19/CCL21/MPP1/DPP4/C5AR1/CSF1R/C3AR1/RAC2/RARRES2/NOD2/BST1/CXCR2	17
BP	GO:0051607	defense response to virus	41/982	265/18723	4.53876e-10	9.38128e-09	6.51767e-09	PTPRC/CARD8/LILRB1/PRF1/FGL2/TLR8/ZBP1/CXCL9/SAMHD1/IFNG/IL12RB1/APOBEC3G/ITGAX/TNFAIP3/IRF1/TLR7/TSPAN32/RNASE6/SEC14L1/CXCL10/GBP1/PHB/STAT1/MAP3K14/IFNGR2/IL12B/TRAF3/RNF125/TRIM22/FOXP3/TRAF3IP2/AKAP1/NLRP1/CD207/MUL1/IRF5/BCL2L1/PTPN22/IL15/PML/APOBEC3F	41
BP	GO:0140546	defense response to symbiont	41/982	265/18723	4.53876e-10	9.38128e-09	6.51767e-09	PTPRC/CARD8/LILRB1/PRF1/FGL2/TLR8/ZBP1/CXCL9/SAMHD1/IFNG/IL12RB1/APOBEC3G/ITGAX/TNFAIP3/IRF1/TLR7/TSPAN32/RNASE6/SEC14L1/CXCL10/GBP1/PHB/STAT1/MAP3K14/IFNGR2/IL12B/TRAF3/RNF125/TRIM22/FOXP3/TRAF3IP2/AKAP1/NLRP1/CD207/MUL1/IRF5/BCL2L1/PTPN22/IL15/PML/APOBEC3F	41
BP	GO:0006898	receptor-mediated endocytosis	39/982	244/18723	4.57595e-10	9.42149e-09	6.54561e-09	LILRB1/PLCG2/LILRB4/APOE/CCL19/ARRB2/STAB1/CALCRL/FCGR2B/APOC1/SIGLEC1/FCER1G/CD14/B2M/SYK/ITGA4/ANXA2/CCL21/CD36/GRB2/SYT11/SNCA/C3/DNM3/ITGB2/CAV2/SFTPD/FCHSD2/MSR1/SDCBP/CXCR2/FPR2/LRP1/ADRB2/HIP1/SCARB2/NEDD4/ANGPT1/BMP2K	39
BP	GO:0033627	cell adhesion mediated by integrin	20/982	72/18723	4.75027e-10	9.74264e-09	6.76872e-09	CCL5/NCKAP1L/LPXN/CD3E/CXCL13/ITGB7/PIK3CG/ITGA2/EPHA2/PTPN6/SYK/ITGA4/CCL21/CYP1B1/DPP4/ITGB5/PLAU/SKAP1/ITGB2/TGFB2	20
BP	GO:0052126	movement in host environment	32/982	175/18723	5.3473e-10	1.09249e-08	7.59014e-09	SLAMF1/ITGB7/CXCR4/ITGA2/CR1/CD4/SELPLG/CD86/CCR5/EPHA2/EFNB2/SIGLEC1/TNFRSF14/NRP1/DPP4/PHB/CR2/TNFRSF4/ITGB5/FCN1/CIITA/LY6E/TRIM22/CD209/CLDN1/CAV2/CTSB/UVRAG/SCARB2/GSN/SIVA1/PML	32
BP	GO:0032743	positive regulation of interleukin-2 production	14/982	34/18723	5.6556e-10	1.15105e-08	7.99698e-09	PTPRC/IRF4/SASH3/CD3E/PDE4B/PRKCQ/PLCG2/CD4/CD86/CCR2/CD28/ANXA1/PDE4D/CD83	14
BP	GO:0007596	blood coagulation	36/982	217/18723	7.52307e-10	1.52529e-08	1.0597e-08	WAS/TLR4/LCK/PRKCQ/PLEK/PLCG2/P2RX1/PIK3CG/APOE/ITGA2/CD40LG/PTPN6/ENTPD1/TSPAN32/FCER1G/SERPING1/PLAT/SH2B3/SYK/HPS5/ANXA2/JAK2/CD36/TXK/FBLN1/MMRN1/PLAU/CD59/VAV1/FGA/FLNA/CD34/GNA12/PROCR/C1QTNF1/TFPI	36
BP	GO:0002577	regulation of antigen processing and presentation	11/982	20/18723	8.49012e-10	1.71481e-08	1.19137e-08	WAS/CCR7/FGL2/LILRB2/CCL19/HLA-DOB/FCGR2B/CCL21/HLA-DOA/NOD2/TAPBPL	11
BP	GO:0007265	Ras protein signal transduction	47/982	337/18723	8.66467e-10	1.74344e-08	1.21126e-08	WAS/MET/GPR18/GPR65/RHOH/CYTH4/P2RY10/DOK3/RASGRP3/PIK3CG/APOE/RASGRP2/CDC42EP1/RASA1/SPRY2/CDC42EP3/GRAP2/HEG1/LIMK1/LPAR6/AIF1/NRP1/DOK2/LAT/DENND3/GRB2/RAC2/CYTH3/RASGRP1/KSR1/RAB33A/ABCA1/STARD8/TGFB2/ARHGEF11/MYO9B/GNA12/RALB/SDCBP/RHOG/RASA3/CDC42EP4/ROBO1/STMN3/DENND4A/RB1/SH3BP1	47
BP	GO:0042130	negative regulation of T cell proliferation	19/982	67/18723	8.76203e-10	1.75355e-08	1.21828e-08	PLA2G2D/LILRB1/LILRB2/LILRB4/CR1/CD86/CRTAM/GPNMB/CTLA4/PTPN6/BTN2A2/TNFRSF14/IL10/PDCD1LG2/FOXP3/SFTPD/SPN/IL2RA/VSIG4	19
BP	GO:0050864	regulation of B cell activation	34/982	198/18723	8.78095e-10	1.75355e-08	1.21828e-08	PTPRC/SASH3/NCKAP1L/CD27/TLR4/BTK/SAMSN1/LAPTM5/CD22/CR1/SLAMF8/INPP5D/TBX21/BANK1/CTLA4/FCGR2B/PTPN6/TNFAIP3/ZFP36L1/CD28/SYK/IKZF3/PARP3/GPR183/CD300A/IL10/TNFRSF4/TYROBP/ATM/MNDA/FOXP3/NOD2/BST1/IL27RA	34
BP	GO:0051235	maintenance of location	46/982	327/18723	9.87634e-10	1.96491e-08	1.36513e-08	PTPRC/LCK/CORO1A/CCR7/PLCG2/NR1H3/APOE/CD4/FASLG/CCL19/CXCL9/CCR5/GM2A/PTPN6/PTK2B/ANXA6/SRGN/CXCL10/CCL21/CD36/IL10/SNCA/C3/CX3CL1/PLIN3/ANK3/ABCA1/PLA2G4C/CXCL11/ITPR1/TNF/INSIG2/CCDC88A/FLNA/MCOLN1/ABCG1/MSR1/OSBPL11/RASA3/UVRAG/PDE4D/GSN/PML/HSP90B1/S100A8/NRIP1	46
BP	GO:0002292	T cell differentiation involved in immune response	20/982	75/18723	1.05233e-09	2.08581e-08	1.44912e-08	LY9/IRF4/FGL2/CCL19/TBX21/CD86/IFNG/IL12RB1/FCER1G/GPR183/ANXA1/PTGER4/JAK3/HLX/IL12B/FOXP3/RORA/SPN/IL18R1/HLA-DRA	20
BP	GO:0032753	positive regulation of interleukin-4 production	12/982	25/18723	1.1186e-09	2.20893e-08	1.53466e-08	IRF4/SASH3/CD3E/PRKCQ/CD86/IL1RAP/CD40LG/HLA-E/CD28/FCER1G/SYK/FOXP3	12
BP	GO:0042267	natural killer cell mediated cytotoxicity	19/982	68/18723	1.15675e-09	2.27579e-08	1.58111e-08	SH2D1A/IL18RAP/LILRB1/CORO1A/GZMB/CD226/SLAMF7/KLRD1/NCR3/CRTAM/LAG3/ARRB2/PTPN6/HLA-E/SERPINB9/IL12B/VAV1/RASGRP1/HLA-F	19
BP	GO:0043030	regulation of macrophage activation	18/982	61/18723	1.19126e-09	2.32664e-08	1.61644e-08	PTPRC/TLR4/NR1H3/STAP1/CD84/FCGR2B/IL33/CST7/CD200/IL10/SYT11/GPR137B/SNCA/CX3CL1/RORA/CEBPA/VSIG4/TLR6	18
BP	GO:0006816	calcium ion transport	54/982	422/18723	1.19135e-09	2.32664e-08	1.61644e-08	PTPRC/IL16/PRKCB/CCL5/MS4A1/LILRB1/LCK/CORO1A/PDE4B/CCR7/PLCG2/LILRB2/P2RX1/CXCR4/PIK3CG/KCNN4/CD4/FASLG/CD84/CCL4/CCL19/CXCL9/CCR5/CCR1/ARRB2/CALCRL/PTPN6/PTK2B/ANXA6/CXCL12/ANXA2/PPP3CA/TRPV2/CXCL10/CCL21/STAC/FYN/P2RX7/SNCA/LGALS3/CX3CL1/CCL8/CXCL11/ANXA2P2/ITPR1/CD33/MCOLN1/RASA3/CCL2/PDE4D/RGS9/GPM6A/PML/BEST1	54
BP	GO:0006887	exocytosis	48/982	352/18723	1.22932e-09	2.392e-08	1.66185e-08	PRKCB/CCL5/NCKAP1L/CORO1A/PLEK/BTK/PTGDS/P2RX1/PIK3CG/FGR/CD84/STX11/PTGDR/CCR2/CCR1/MICAL1/IFNG/FCGR2B/HMOX1/PIK3CD/FOXF1/SYK/HCK/ANXA3/LAT/ANXA1/CD300A/SYT11/SNCA/RAC2/CCL8/PTAFR/RAB27B/RASGRP1/RAB8B/FGA/ITGB2/SPI1/HLA-F/FER/RALB/IL13RA2/SDCBP/SYTL2/DVL1/C12orf4/TNFAIP2/CRHBP	48
BP	GO:0097696	receptor signaling pathway via STAT	32/982	181/18723	1.29262e-09	2.50599e-08	1.74104e-08	IL10RA/PTPRC/CCL5/HCLS1/IL7R/STAT5A/CCR2/IFNG/PTK2B/FLT3/IL24/GADD45A/SH2B3/STAT4/CSF2/JAK2/CYP1B1/CRLF3/CD300A/JAK3/CSF1R/FYN/STAT1/IL10/IL12B/TNF/FER/HSF1/IL15/CCL2/THPO/PIAS1	32
BP	GO:0002715	regulation of natural killer cell mediated immunity	16/982	48/18723	1.34104e-09	2.5904e-08	1.79969e-08	SH2D1A/IL18RAP/LILRB1/CD226/KLRD1/NCR3/CD96/CRTAM/LAG3/ARRB2/HLA-E/SERPINB9/IL12B/VAV1/RASGRP1/HLA-F	16
BP	GO:1901214	regulation of neuron death	45/982	319/18723	1.3738e-09	2.64407e-08	1.83697e-08	TNFRSF1B/CCL5/TLR4/CORO1A/APOE/FASLG/CAPN2/KMO/ARRB2/IFNG/C1QA/RASA1/GPNMB/FCGR2B/HMOX1/PTK2B/EFNB2/JAK2/CD200/NRP1/ADORA1/ADAM8/C5AR1/FYN/IL10/TYROBP/SNCA/NAIP/CX3CL1/ITGB2/TNF/HLA-F/GBE1/TGFB2/BCL2L1/CTSZ/CD34/HSF1/TLR6/LRP1/PPARGC1A/CCL2/ANGPT1/ATF4/AGAP2	45
BP	GO:0045765	regulation of angiogenesis	47/982	342/18723	1.41583e-09	2.71513e-08	1.88634e-08	PPP1R16B/PRKCB/CXCL13/CXCR4/FASLG/CYBB/CCR2/ENPP2/STAB1/EPHA2/GPNMB/HHEX/SPRY2/HMOX1/ITGAX/PTK2B/PIK3CD/TNFAIP3/GADD45A/TEK/VASH1/ACVRL1/CXCL10/CYP1B1/PTGIS/NRP1/ANXA3/C5AR1/STAT1/IL10/C3/C3AR1/ETS1/TIE1/ADAMTS1/KLF2/TNF/DCN/TGFB2/CD34/EFNA3/PAK4/CXCR2/CCL11/HOXA5/GLUL/PML	47
BP	GO:0050817	coagulation	36/982	222/18723	1.42798e-09	2.72857e-08	1.89568e-08	WAS/TLR4/LCK/PRKCQ/PLEK/PLCG2/P2RX1/PIK3CG/APOE/ITGA2/CD40LG/PTPN6/ENTPD1/TSPAN32/FCER1G/SERPING1/PLAT/SH2B3/SYK/HPS5/ANXA2/JAK2/CD36/TXK/FBLN1/MMRN1/PLAU/CD59/VAV1/FGA/FLNA/CD34/GNA12/PROCR/C1QTNF1/TFPI	36
BP	GO:2000404	regulation of T cell migration	15/982	42/18723	1.46147e-09	2.78255e-08	1.93319e-08	CCL5/CXCL13/CCR2/TNFRSF14/CXCL12/ITGA4/CD200/CXCL10/CCL21/AIF1/ADAM8/APP/CCR6/SPN/IL27RA	15
BP	GO:0002702	positive regulation of production of molecular mediator of immune response	25/982	117/18723	1.46854e-09	2.78603e-08	1.9356e-08	PTPRC/SLAMF1/SASH3/LILRB1/TLR4/PLCG2/CD226/LAPTM5/TBX21/CD86/BCL10/CD244/HLA-E/CD28/TNFRSF14/B2M/CD36/PHB/IL10/TNFRSF4/HLA-F/DNAJB9/NOD2/IL18R1/PTPN22	25
BP	GO:0014065	phosphatidylinositol 3-kinase signaling	28/982	144/18723	1.51268e-09	2.85957e-08	1.98669e-08	NCF1/PPP1R16B/CCL5/HCLS1/PIK3CG/FGR/SEMA4D/PIK3R5/PTPN6/PIK3CD/PDGFC/FLT3/ZFP36L1/CD28/TEK/JAK2/FYN/RASGRP1/TNF/DCN/TGFB2/PIK3IP1/MYO16/CAT/ROR1/PIK3C2B/NEDD4/ANGPT1	28
BP	GO:0032613	interleukin-10 production	18/982	62/18723	1.59702e-09	2.9871e-08	2.0753e-08	IRF4/SASH3/LILRB1/TLR4/PLCG2/LILRB4/CD40LG/FCGR2B/CD28/SYK/JAK3/TYROBP/IL12B/PDCD1LG2/FOXP3/CD34/NOD2/CD83	18
BP	GO:0032653	regulation of interleukin-10 production	18/982	62/18723	1.59702e-09	2.9871e-08	2.0753e-08	IRF4/SASH3/LILRB1/TLR4/PLCG2/LILRB4/CD40LG/FCGR2B/CD28/SYK/JAK3/TYROBP/IL12B/PDCD1LG2/FOXP3/CD34/NOD2/CD83	18
BP	GO:0048002	antigen processing and presentation of peptide antigen	18/982	62/18723	1.59702e-09	2.9871e-08	2.0753e-08	CTSS/HLA-DOB/FCGR2B/HLA-E/FCER1G/B2M/HLA-DMB/TAP1/HLA-DOA/CD209/HLA-F/HLA-DPB1/HLA-DPA1/HLA-DMA/TAP2/ACE/HLA-DRA/TAPBPL	18
BP	GO:0051701	biological process involved in interaction with host	34/982	203/18723	1.72306e-09	3.21154e-08	2.23123e-08	SLAMF1/ITGB7/CXCR4/ITGA2/CR1/CD4/SELPLG/CD86/CCR5/EPHA2/EFNB2/SIGLEC1/TNFRSF14/NRP1/DPP4/PHB/CR2/TNFRSF4/ITGB5/FCN1/CIITA/LY6E/SERPINB9/TRIM22/CD209/CLDN1/CAV2/BCL2L1/CTSB/UVRAG/SCARB2/GSN/SIVA1/PML	34
BP	GO:0050878	regulation of body fluid levels	50/982	379/18723	1.7489e-09	3.24831e-08	2.25677e-08	WAS/FLI1/MET/TLR4/LCK/PRKCQ/PLEK/PLCG2/NR1H3/P2RX1/PIK3CG/KCNN4/APOE/ITGA2/STAT5A/CD40LG/PTPN6/ENTPD1/TSPAN32/HEG1/FCER1G/SERPING1/PLAT/SH2B3/SYK/HPS5/ANXA2/JAK2/GJA5/CD36/ADORA1/EDNRB/TXK/FBLN1/MMRN1/PLAU/CD59/PAM/CDO1/VAV1/FGA/CLDN1/TRAF3IP2/AQP4/FLNA/CD34/GNA12/PROCR/C1QTNF1/TFPI	50
BP	GO:0032755	positive regulation of interleukin-6 production	22/982	93/18723	1.86268e-09	3.44758e-08	2.39522e-08	IL16/TLR4/PLCG2/LILRB2/TLR8/EREG/BCL10/IFNG/IL1RAP/TLR7/IL33/SYK/TLR1/AIF1/CD36/TYROBP/PTAFR/TNF/APP/IL17RA/NOD2/TLR6	22
BP	GO:0002710	negative regulation of T cell mediated immunity	12/982	26/18723	1.97833e-09	3.63208e-08	2.5234e-08	PTPRC/SLAMF1/NCKAP1L/LILRB1/LILRB4/KLRD1/IL7R/TBX21/FCGR2B/FOXP3/HLA-F/NOD2	12
BP	GO:0045954	positive regulation of natural killer cell mediated cytotoxicity	12/982	26/18723	1.97833e-09	3.63208e-08	2.5234e-08	SH2D1A/IL18RAP/CD226/KLRD1/NCR3/CRTAM/LAG3/HLA-E/IL12B/VAV1/RASGRP1/HLA-F	12
BP	GO:0002381	immunoglobulin production involved in immunoglobulin-mediated immune response	19/982	70/18723	1.98288e-09	3.63208e-08	2.5234e-08	PTPRC/BTK/TBX21/HLA-DOB/CD40LG/CD28/B2M/PARP3/IL10/HLA-DMB/HLA-DOA/FOXP3/TRAF3IP2/HLA-DPB1/HLA-DPA1/CCR6/HLA-DMA/IL27RA/HLA-DRA	19
BP	GO:0043368	positive T cell selection	14/982	37/18723	2.14022e-09	3.90682e-08	2.71427e-08	PTPRC/LY9/DOCK2/IRF4/ZAP70/CD3E/CD3G/CD3D/BCL11B/TBX21/IL12RB1/IL12B/FOXP3/SPN	14
BP	GO:0002887	negative regulation of myeloid leukocyte mediated immunity	8/982	10/18723	2.28143e-09	4.15032e-08	2.88345e-08	CD84/CCR2/FCGR2B/HMOX1/FOXF1/CD300A/SPI1/IL13RA2	8
BP	GO:0030316	osteoclast differentiation	22/982	94/18723	2.31296e-09	4.19332e-08	2.91332e-08	LILRB1/TLR4/LILRB4/RASSF2/LILRB3/INPP5D/CCR1/IFNG/EPHA2/MAFB/ANXA2/GPR183/SNX10/CSF1R/GPR137B/TYROBP/IL12B/OSTM1/CAMK4/TNF/CLDN18/LRRK1	22
BP	GO:0031334	positive regulation of protein-containing complex assembly	37/982	237/18723	2.49049e-09	4.49983e-08	3.12627e-08	WAS/MET/NCKAP1L/TLR4/CORO1A/GMFG/PLEK/CCR7/PLCG2/CXCL13/EVL/LCP1/CDC42EP1/IFNG/CDC42EP3/PTK2B/TCL1A/SYK/CSF2/CCL21/HCK/CD36/GRB2/ATM/SNCA/LGALS3/SKAP1/IQGAP2/ABCA1/TNF/CDKN1B/FER/FCHSD2/TLR6/CCL11/GSN/CDC42EP4	37
BP	GO:1901342	regulation of vasculature development	47/982	348/18723	2.5135e-09	4.526e-08	3.14445e-08	PPP1R16B/PRKCB/CXCL13/CXCR4/FASLG/CYBB/CCR2/ENPP2/STAB1/EPHA2/GPNMB/HHEX/SPRY2/HMOX1/ITGAX/PTK2B/PIK3CD/TNFAIP3/GADD45A/TEK/VASH1/ACVRL1/CXCL10/CYP1B1/PTGIS/NRP1/ANXA3/C5AR1/STAT1/IL10/C3/C3AR1/ETS1/TIE1/ADAMTS1/KLF2/TNF/DCN/TGFB2/CD34/EFNA3/PAK4/CXCR2/CCL11/HOXA5/GLUL/PML	47
BP	GO:0046638	positive regulation of alpha-beta T cell differentiation	16/982	50/18723	2.65183e-09	4.75896e-08	3.3063e-08	ZAP70/SASH3/NCKAP1L/LILRB4/RUNX3/CCL19/CD86/IFNG/IL12RB1/SYK/ANXA1/HLX/IL12B/FOXP3/CD83/HLA-DRA	16
BP	GO:0030888	regulation of B cell proliferation	18/982	64/18723	2.81577e-09	5.03615e-08	3.49888e-08	PTPRC/SASH3/NCKAP1L/TLR4/BTK/CD22/INPP5D/CTLA4/FCGR2B/IKZF3/GPR183/CD300A/IL10/TNFRSF4/TYROBP/ATM/MNDA/BST1	18
BP	GO:0070997	neuron death	48/982	361/18723	2.86049e-09	5.09898e-08	3.54253e-08	TNFRSF1B/CCL5/TLR4/CORO1A/APOE/FASLG/CAPN2/KMO/ARRB2/IFNG/C1QA/RASA1/GPNMB/FCGR2B/HMOX1/PTK2B/EFNB2/JAK2/CD200/NRP1/ADORA1/ADAM8/C5AR1/FYN/IL10/TYROBP/SNCA/NAIP/CX3CL1/ITGB2/TNF/HLA-F/GBE1/APP/TGFB2/NLRP1/BCL2L1/CTSZ/CD34/HSF1/TLR6/LRP1/PPARGC1A/CCL2/ANGPT1/RB1/ATF4/AGAP2	48
BP	GO:0001776	leukocyte homeostasis	21/982	87/18723	2.93115e-09	5.20745e-08	3.61789e-08	NCKAP1L/CORO1A/PDE4B/SIT1/TNFRSF17/BCL10/CCR2/PIK3CD/TNFAIP3/FLT3/SH2B3/DOCK10/TNFSF14/GPR183/LAT/ANXA1/JAK3/FOXP3/TRAF3IP2/IL2RA/CXCR2	21
BP	GO:0042269	regulation of natural killer cell mediated cytotoxicity	15/982	44/18723	3.08469e-09	5.46195e-08	3.7947e-08	SH2D1A/IL18RAP/LILRB1/CD226/KLRD1/NCR3/CRTAM/LAG3/ARRB2/HLA-E/SERPINB9/IL12B/VAV1/RASGRP1/HLA-F	15
BP	GO:0002478	antigen processing and presentation of exogenous peptide antigen	14/982	38/18723	3.22576e-09	5.67392e-08	3.94197e-08	CTSS/HLA-DOB/FCGR2B/HLA-E/FCER1G/B2M/HLA-DMB/TAP1/HLA-DOA/HLA-F/HLA-DPB1/HLA-DPA1/HLA-DMA/HLA-DRA	14
BP	GO:0046633	alpha-beta T cell proliferation	14/982	38/18723	3.22576e-09	5.67392e-08	3.94197e-08	PTPRC/DOCK2/ZAP70/CD3E/CCR2/IRF1/EBI3/HLA-E/CD28/TNFRSF14/SYK/IL12B/PTPN22/IL15	14
BP	GO:0043370	regulation of CD4-positive, alpha-beta T cell differentiation	16/982	51/18723	3.67721e-09	6.44666e-08	4.47883e-08	IRF4/SASH3/NCKAP1L/RUNX3/CCL19/TBX21/CD86/IFNG/IL12RB1/ANXA1/JAK3/HLX/IL12B/FOXP3/CD83/HLA-DRA	16
BP	GO:0045453	bone resorption	18/982	65/18723	3.70497e-09	6.47395e-08	4.49779e-08	S1PR1/INPP5D/ACP5/PTK2B/TNFAIP3/SYK/SNX10/ADAM8/CSF1R/GPR137B/P2RX7/RAC2/CSK/ADRB2/PLEKHM1/CALCA/CLDN18/LRRK1	18
BP	GO:0045055	regulated exocytosis	36/982	230/18723	3.80762e-09	6.63149e-08	4.60725e-08	PRKCB/NCKAP1L/CORO1A/PLEK/BTK/PTGDS/P2RX1/PIK3CG/FGR/CD84/STX11/PTGDR/CCR2/MICAL1/FCGR2B/HMOX1/PIK3CD/FOXF1/SYK/HCK/ANXA3/LAT/CD300A/SYT11/SNCA/RAC2/PTAFR/RASGRP1/ITGB2/SPI1/HLA-F/FER/IL13RA2/DVL1/C12orf4/CRHBP	36
BP	GO:0002637	regulation of immunoglobulin production	19/982	73/18723	4.28085e-09	7.43133e-08	5.16294e-08	PTPRC/SASH3/CD22/CR1/TBX21/CD86/CD40LG/FCGR2B/HLA-E/CD28/PARP3/PHB/IL10/TNFRSF4/FOXP3/TNF/DNAJB9/IL13RA2/IL27RA	19
BP	GO:0007259	receptor signaling pathway via JAK-STAT	30/982	170/18723	4.42043e-09	7.64864e-08	5.31391e-08	IL10RA/PTPRC/CCL5/HCLS1/STAT5A/CCR2/IFNG/PTK2B/FLT3/IL24/GADD45A/SH2B3/STAT4/CSF2/JAK2/CYP1B1/CRLF3/CD300A/JAK3/CSF1R/FYN/STAT1/IL10/IL12B/TNF/FER/HSF1/IL15/CCL2/PIAS1	30
BP	GO:0002544	chronic inflammatory response	10/982	18/18723	4.48393e-09	7.69024e-08	5.34282e-08	CCL5/CXCL13/LTA/TNFAIP3/IL10/VCAM1/FOXP3/TNF/CCL11/S100A8	10
BP	GO:0002335	mature B cell differentiation	13/982	33/18723	4.51686e-09	7.69024e-08	5.34282e-08	IRF8/PLCG2/MFNG/ITM2A/CR1/PLCL2/SLAMF8/FCGR2B/PTK2B/DOCK10/GPR183/IL10/SPI1	13
BP	GO:0032633	interleukin-4 production	13/982	33/18723	4.51686e-09	7.69024e-08	5.34282e-08	IRF4/SASH3/CD3E/PRKCQ/CD86/IL1RAP/CD40LG/HLA-E/CD28/FCER1G/SYK/FOXP3/CD83	13
BP	GO:0032673	regulation of interleukin-4 production	13/982	33/18723	4.51686e-09	7.69024e-08	5.34282e-08	IRF4/SASH3/CD3E/PRKCQ/CD86/IL1RAP/CD40LG/HLA-E/CD28/FCER1G/SYK/FOXP3/CD83	13
BP	GO:0050901	leukocyte tethering or rolling	13/982	33/18723	4.51686e-09	7.69024e-08	5.34282e-08	SELL/ITGB7/SELPLG/CCR2/CXCL12/JAM2/ITGA4/CCL21/PTAFR/VCAM1/TNF/SPN/FUT7	13
BP	GO:0051090	regulation of DNA-binding transcription factor activity	54/982	440/18723	5.32345e-09	9.03456e-08	6.27678e-08	PRKCB/IL18RAP/HCLS1/CARD8/TLR4/PRKCQ/PLCG2/BTK/CMKLR1/GFI1/BCL10/ARRB2/IL1RAP/CD40LG/PRKCH/HMOX1/CYLD/TNFAIP3/SYK/PPP3CA/JAK2/CD200/HCK/CYP1B1/PTGIS/CD36/ANXA3/ADAM8/IL10/TNFRSF4/BHLHE40/ARID5B/CX3CL1/WNT2/TRAF3/TRIM22/FOXP3/SPI1/TNF/APP/FER/FLNA/NOD2/LRP5/IL18R1/CAT/HSF1/TLR6/ROR1/PPARGC1A/MAP3K13/IRAK3/RB1/S100A8	54
BP	GO:0046849	bone remodeling	21/982	90/18723	5.65619e-09	9.56869e-08	6.64788e-08	RASSF2/S1PR1/INPP5D/ACP5/EPHA2/PTK2B/TNFAIP3/SYK/SNX10/ADAM8/CSF1R/GPR137B/P2RX7/RAC2/CSK/LRP5/ADRB2/PLEKHM1/CALCA/CLDN18/LRRK1	21
BP	GO:0043547	positive regulation of GTPase activity	38/982	255/18723	5.72913e-09	9.66132e-08	6.71223e-08	ARHGAP25/CCL5/GPR65/CCR7/CXCL13/S1PR1/RASGRP2/SEMA4D/CCL4/CCL19/EPHA2/RASA1/PTK2B/BCAR3/DOCK10/ADPRH/CCL21/S100A10/TBC1D9/RGS1/CCL18/CX3CL1/CCL8/VAV1/RASGRP1/CAV2/GMIP/ADAP2/RHOG/CCL11/CCL2/TBC1D4/GRTP1/CHN1/CCL17/ABR/TBC1D2B/SH3BP1	38
BP	GO:0045936	negative regulation of phosphate metabolic process	54/982	441/18723	5.76719e-09	9.69472e-08	6.73543e-08	PTPRC/PPP1R16B/LAX1/NCKAP1L/PLEK/LILRB4/RASSF2/STAP1/SAMSN1/APOE/DUSP6/SEMA4D/MICAL1/ARRB2/IFNG/HHEX/SPRY2/PTPN6/TNFAIP3/APOC1/HEG1/GADD45A/CBFA2T3/SH2B3/SIRPA/CD300A/CTDSPL/FBLN1/SNCA/LGALS3/CAMK2N1/KAT2B/PTPN1/TNF/DUSP7/CDKN1B/TGFB2/FABP4/TAF7/CEBPA/CSK/PIK3IP1/LRP5/LRP1/PPARGC1A/PTPN22/DVL1/PDE4D/IRAK3/MVP/ANGPT1/RB1/DBNDD1/LRRK1	54
BP	GO:0007229	integrin-mediated signaling pathway	23/982	107/18723	5.86514e-09	9.82827e-08	6.82821e-08	ITGAL/PLEK/ITGB7/ITGA2/FGR/CD40LG/ITGAX/PTK2B/TSPAN32/SYK/ITGA4/HCK/NRP1/LAT/TXK/ITGB5/VAV1/ADAMTS1/DST/ITGB2/ITGA8/FLNA/BST1	23
BP	GO:0007015	actin filament organization	54/982	442/18723	6.24594e-09	1.04008e-07	7.22596e-08	ARHGAP25/WAS/MET/HCLS1/MYO1F/NCKAP1L/GPR65/RHOH/WIPF1/CORO1A/GMFG/PLEK/CCR7/PSTPIP1/S1PR1/EVL/LCP1/MICAL1/CDC42EP1/RASA1/CDC42EP3/PTK2B/LIMK1/PLS3/CXCL12/COTL1/GAS7/JAK2/CCL21/AIF1/HCK/NRP1/PTGER4/GRB2/ITGB5/S100A10/MYO5A/RAC2/CX3CL1/CYFIP2/IQGAP2/PHACTR1/MICAL2/FER/CCDC88A/FLNA/FCHSD2/RHOG/CCL11/HIP1/GSN/CDC42EP4/HSP90B1/SH3BP1	54
BP	GO:0010563	negative regulation of phosphorus metabolic process	54/982	442/18723	6.24594e-09	1.04008e-07	7.22596e-08	PTPRC/PPP1R16B/LAX1/NCKAP1L/PLEK/LILRB4/RASSF2/STAP1/SAMSN1/APOE/DUSP6/SEMA4D/MICAL1/ARRB2/IFNG/HHEX/SPRY2/PTPN6/TNFAIP3/APOC1/HEG1/GADD45A/CBFA2T3/SH2B3/SIRPA/CD300A/CTDSPL/FBLN1/SNCA/LGALS3/CAMK2N1/KAT2B/PTPN1/TNF/DUSP7/CDKN1B/TGFB2/FABP4/TAF7/CEBPA/CSK/PIK3IP1/LRP5/LRP1/PPARGC1A/PTPN22/DVL1/PDE4D/IRAK3/MVP/ANGPT1/RB1/DBNDD1/LRRK1	54
BP	GO:0019932	second-messenger-mediated signaling	43/982	312/18723	6.51454e-09	1.08141e-07	7.51315e-08	PTPRC/CXCR6/ZAP70/CD3E/TRAT1/PLEK/CCR7/PLCG2/BTK/CXCR3/CMKLR1/CXCR4/CXCR5/APOE/CD22/CD4/CCL4/CCR2/CCR5/CCR1/PTK2B/SYK/PPP3CA/CD36/LAT/GBP1/EDNRB/HRH1/P2RX7/FPR1/VCAM1/KSR1/NFATC1/ITPR1/TNF/PDE3A/CCR6/MCOLN1/CCRL2/BST1/CXCR2/FPR2/PDE4D	43
BP	GO:2000116	regulation of cysteine-type endopeptidase activity	36/982	235/18723	6.84581e-09	1.13286e-07	7.8706e-08	CD27/CARD8/LCK/P2RX1/LAPTM5/FASLG/BCL10/MICAL1/ARRB2/LAMP3/SYK/TNFSF14/CST7/JAK2/CASP1/CAST/FYN/SNCA/NAIP/SERPINB9/CYFIP2/MEFV/PSMB9/TNF/NLRP1/MUL1/RPS6KA3/MMP9/HSF1/CASP10/HIP1/GSN/NLE1/PML/ROBO1/S100A8	36
BP	GO:0002294	CD4-positive, alpha-beta T cell differentiation involved in immune response	18/982	68/18723	8.15906e-09	1.34599e-07	9.35131e-08	LY9/IRF4/CCL19/TBX21/CD86/IFNG/IL12RB1/GPR183/ANXA1/PTGER4/JAK3/HLX/IL12B/FOXP3/RORA/SPN/IL18R1/HLA-DRA	18
BP	GO:0032970	regulation of actin filament-based process	50/982	397/18723	8.40777e-09	1.38273e-07	9.60653e-08	WAS/MET/HCLS1/NCKAP1L/GPR65/RHOH/CORO1A/PDE4B/GMFG/PLEK/CCR7/S1PR1/STAP1/EVL/CDC42EP1/RASA1/CDC42EP3/PTK2B/LIMK1/TEK/CXCL12/COTL1/CCL21/HCK/GJA5/NRP1/ADORA1/PTGER4/GRB2/CSF1R/S100A10/PAM/RAC2/CX3CL1/CYFIP2/IQGAP2/FGF13/FER/CCDC88A/FLNA/FCHSD2/BST1/RHOG/LRP1/CCL11/PDE4D/GSN/CDC42EP4/IQGAP1/SH3BP1	50
BP	GO:0019884	antigen processing and presentation of exogenous antigen	15/982	47/18723	8.69483e-09	1.42552e-07	9.90386e-08	CD1D/CTSS/HLA-DOB/FCGR2B/HLA-E/FCER1G/B2M/HLA-DMB/TAP1/HLA-DOA/HLA-F/HLA-DPB1/HLA-DPA1/HLA-DMA/HLA-DRA	15
BP	GO:0034113	heterotypic cell-cell adhesion	17/982	61/18723	9.03815e-09	1.47725e-07	1.02632e-07	PTPRC/CD2/LCK/CD1D/LILRB2/ITGB7/ITGAX/ITGA4/SIRPA/CD200/IL10/CD58/SKAP1/VCAM1/FGA/ITGB2/TNF	17
BP	GO:2000406	positive regulation of T cell migration	12/982	29/18723	9.18183e-09	1.49613e-07	1.03944e-07	CCL5/CXCL13/CCR2/TNFRSF14/CXCL12/ITGA4/CXCL10/CCL21/AIF1/ADAM8/APP/SPN	12
BP	GO:0002287	alpha-beta T cell activation involved in immune response	18/982	69/18723	1.05028e-08	1.70093e-07	1.18173e-07	LY9/IRF4/CCL19/TBX21/CD86/IFNG/IL12RB1/GPR183/ANXA1/PTGER4/JAK3/HLX/IL12B/FOXP3/RORA/SPN/IL18R1/HLA-DRA	18
BP	GO:0002293	alpha-beta T cell differentiation involved in immune response	18/982	69/18723	1.05028e-08	1.70093e-07	1.18173e-07	LY9/IRF4/CCL19/TBX21/CD86/IFNG/IL12RB1/GPR183/ANXA1/PTGER4/JAK3/HLX/IL12B/FOXP3/RORA/SPN/IL18R1/HLA-DRA	18
BP	GO:0019058	viral life cycle	43/982	317/18723	1.05391e-08	1.70163e-07	1.18221e-07	SLAMF1/CXCR6/CCL5/ITGB7/CXCR4/APOE/ITGA2/CR1/CD4/SELPLG/CD86/CCR5/EPHA2/APOBEC3G/EFNB2/LAMP3/SIGLEC1/CD28/TNFRSF14/NRP1/DPP4/PHB/CR2/TNFRSF4/ITGB5/FCN1/CIITA/LY6E/CCL8/TRIM22/CD209/CLDN1/TNF/CAV2/CTSB/UVRAG/CCL2/SCARB2/GSN/SIVA1/PML/NEDD4/APOBEC3F	43
BP	GO:0001667	ameboidal-type cell migration	56/982	475/18723	1.1754e-08	1.89204e-07	1.3145e-07	MET/LPXN/PLCG2/CXCL13/ITGB7/CARD10/EVL/PIK3CG/APOE/ITGA2/STAT5A/ACVR1/SEMA4D/ZEB2/ENPP2/IFNG/EPHA2/HMOX1/PTK2B/SEMA3C/EFNB2/PIK3CD/ANXA6/GADD45A/TEK/VASH1/ITGA4/ACVRL1/CYP1B1/NRP1/ANXA3/ANXA1/EDNRB/DPP4/SMURF2/PTPRG/ARID5B/PRCP/ETS1/MAP3K3/TNF/DCN/TGFB2/FER/CCR6/S100P/GNA12/MEOX2/LRP5/MMP9/GLUL/PML/ROBO1/ANGPT1/SH3BP1/NRTN	56
BP	GO:0032731	positive regulation of interleukin-1 beta production	17/982	62/18723	1.18492e-08	1.90161e-07	1.32115e-07	CARD8/TLR4/PYHIN1/TLR8/CCL19/IFNG/JAK2/CASP1/CD36/TYROBP/P2RX7/MNDA/TNF/APP/NLRP1/NOD2/TLR6	17
BP	GO:0033628	regulation of cell adhesion mediated by integrin	15/982	48/18723	1.20375e-08	1.92599e-07	1.33809e-07	CCL5/NCKAP1L/LPXN/CD3E/CXCL13/PIK3CG/EPHA2/PTPN6/SYK/CCL21/CYP1B1/DPP4/PLAU/SKAP1/TGFB2	15
BP	GO:0014068	positive regulation of phosphatidylinositol 3-kinase signaling	19/982	79/18723	1.76218e-08	2.81102e-07	1.95296e-07	NCF1/CCL5/HCLS1/FGR/SEMA4D/PTPN6/PDGFC/FLT3/CD28/TEK/JAK2/FYN/TNF/DCN/TGFB2/CAT/ROR1/NEDD4/ANGPT1	19
BP	GO:0042088	T-helper 1 type immune response	14/982	43/18723	2.0441e-08	3.25098e-07	2.25863e-07	SLAMF1/TLR4/CCL19/CCR2/IL12RB1/IL18BP/EBI3/ANXA1/JAK3/HLX/IL12B/SPN/IL18R1/IL27RA	14
BP	GO:0030101	natural killer cell activation	20/982	88/18723	2.10371e-08	3.33579e-07	2.31755e-07	PTPRC/SLAMF1/CD2/CORO1A/SLAMF7/PRDM1/NCR3/FGR/IL21R/PIK3CD/CD244/HLA-E/TYROBP/IL12B/RASGRP1/HLA-F/IL18R1/PTPN22/IL15RA/IL15	20
BP	GO:0002717	positive regulation of natural killer cell mediated immunity	12/982	31/18723	2.26463e-08	3.56965e-07	2.48002e-07	SH2D1A/IL18RAP/CD226/KLRD1/NCR3/CRTAM/LAG3/HLA-E/IL12B/VAV1/RASGRP1/HLA-F	12
BP	GO:0045066	regulatory T cell differentiation	12/982	31/18723	2.26463e-08	3.56965e-07	2.48002e-07	PLA2G2D/LILRB2/LILRB4/CR1/LAG3/IFNG/CTLA4/IRF1/CD28/FOXP3/FUT7/HLA-DRA	12
BP	GO:0060249	anatomical structure homeostasis	42/982	314/18723	2.35501e-08	3.70113e-07	2.57137e-07	SASH3/PECAM1/TLR4/CORO1A/NELL2/P2RX1/S1PR1/INPP5D/CCR2/ACP5/PTK2B/TNFAIP3/B2M/JAM2/SYK/HAAO/LDB2/LYZ/ADORA1/SNX10/ADAM8/CSF1R/GPR137B/P2RX7/LIPA/CDH3/RAC2/CX3CL1/CLDN1/SFTPD/CSK/CD34/NOD2/MKS1/ADRB2/PLEKHM1/CALCA/CLDN18/ANGPT1/RB1/MUC13/LRRK1	42
BP	GO:0051770	positive regulation of nitric-oxide synthase biosynthetic process	9/982	16/18723	2.37372e-08	3.71953e-07	2.58415e-07	TLR4/IFNG/IL33/JAK2/STAT1/FCER2/MAP2K6/NOD2/CCL2	9
BP	GO:0032732	positive regulation of interleukin-1 production	18/982	73/18723	2.74692e-08	4.29165e-07	2.98164e-07	IL16/CARD8/TLR4/PYHIN1/TLR8/CCL19/IFNG/JAK2/CASP1/CD36/TYROBP/P2RX7/MNDA/TNF/APP/NLRP1/NOD2/TLR6	18
BP	GO:0031589	cell-substrate adhesion	46/982	363/18723	2.75521e-08	4.29198e-07	2.98187e-07	ITGAL/LPXN/CD3E/CORO1A/CCR7/ITGB7/ITGA2/CD96/STK4/RASA1/PTK2B/SIGLEC1/TEK/FOXF1/LYVE1/ITGA4/JAK2/EGFL6/ACVRL1/CCL21/NRP1/CD36/GBP1/FBLN1/ITGB5/S100A10/FBLN5/PLAU/SKAP1/RAC2/CX3CL1/VCAM1/FGA/ITGB2/FER/PLEKHA2/ITGA8/FLNA/CD34/BST1/JAG1/LRP1/EDIL3/IQGAP1/ANGPT1/COL8A1	46
BP	GO:0046641	positive regulation of alpha-beta T cell proliferation	10/982	21/18723	3.12768e-08	4.85796e-07	3.37508e-07	PTPRC/ZAP70/CD3E/CCR2/EBI3/HLA-E/CD28/SYK/IL12B/PTPN22	10
BP	GO:0042093	T-helper cell differentiation	17/982	66/18723	3.30473e-08	5.118e-07	3.55575e-07	LY9/IRF4/CCL19/TBX21/CD86/IL12RB1/GPR183/ANXA1/PTGER4/JAK3/HLX/IL12B/FOXP3/RORA/SPN/IL18R1/HLA-DRA	17
BP	GO:0043372	positive regulation of CD4-positive, alpha-beta T cell differentiation	12/982	32/18723	3.4509e-08	5.31338e-07	3.69148e-07	SASH3/NCKAP1L/CCL19/CD86/IFNG/IL12RB1/ANXA1/HLX/IL12B/FOXP3/CD83/HLA-DRA	12
BP	GO:0090022	regulation of neutrophil chemotaxis	12/982	32/18723	3.4509e-08	5.31338e-07	3.69148e-07	NCKAP1L/CCR7/CCL19/CCL21/MPP1/DPP4/C5AR1/C3AR1/RAC2/NOD2/BST1/CXCR2	12
BP	GO:0002832	negative regulation of response to biotic stimulus	22/982	108/18723	3.53236e-08	5.42309e-07	3.76771e-07	CARD8/LILRB1/FGL2/NR1H3/KLRD1/CR1/CD96/SLAMF8/SAMHD1/ARRB2/TNFAIP3/HLA-E/SERPING1/SEC14L1/A2M/SERPINB9/RNF125/FOXP3/HLA-F/MUL1/VSIG4/IRAK3	22
BP	GO:0016032	viral process	50/982	415/18723	3.5938e-08	5.50152e-07	3.8222e-07	SLAMF1/CXCR6/CCL5/ITGB7/CXCR4/GFI1/APOE/ITGA2/CR1/CD4/CCL4/SELPLG/CD86/CCR5/EPHA2/APOBEC3G/EFNB2/LAMP3/SIGLEC1/CD28/TNFRSF14/MGAT1/NRP1/DPP4/PHB/STAT1/CR2/TNFRSF4/ITGB5/FCN1/CIITA/LY6E/CCL8/MGAT4A/TRIM22/CD209/CLDN1/TNF/CAV2/BCL2L1/SPCS3/CTSB/UVRAG/CCL2/SCARB2/GSN/SIVA1/PML/NEDD4/APOBEC3F	50
BP	GO:2000514	regulation of CD4-positive, alpha-beta T cell activation	17/982	67/18723	4.21396e-08	6.43234e-07	4.46888e-07	IRF4/SASH3/NCKAP1L/PRKCQ/RUNX3/CCL19/TBX21/CD86/IFNG/IL12RB1/ANXA1/JAK3/HLX/IL12B/FOXP3/CD83/HLA-DRA	17
BP	GO:0033077	T cell differentiation in thymus	18/982	75/18723	4.32391e-08	6.58127e-07	4.57235e-07	PTPRC/DOCK2/ZAP70/CD3E/CD3G/CD3D/CCR7/BCL11B/IL7R/MAFB/ZFP36L1/CD28/B2M/ADAM8/RASGRP1/FOXP3/CAMK4/CCR6	18
BP	GO:0043405	regulation of MAP kinase activity	29/982	177/18723	4.4336e-08	6.72893e-07	4.67494e-07	LAX1/TLR4/PIK3CG/APOE/CCL19/SPRY2/PIK3R5/PTPN6/PTK2B/PDGFC/FLT3/FGD2/SH2B3/SYK/ADAM8/CD300A/PTPN1/RASGRP1/KSR1/TNF/DUSP7/CSK/NOD2/TLR6/PTPN22/MAP3K13/IRAK3/IQGAP1/ROBO1	29
BP	GO:0010758	regulation of macrophage chemotaxis	11/982	27/18723	4.69166e-08	7.10031e-07	4.93296e-07	SLAMF1/CCL5/CMKLR1/STAP1/SLAMF8/PTK2B/C5AR1/CSF1R/C3AR1/MMP28/RARRES2	11
BP	GO:0001914	regulation of T cell mediated cytotoxicity	13/982	39/18723	4.76965e-08	7.17745e-07	4.98655e-07	PTPRC/NCKAP1L/LILRB1/CD1D/KLRD1/IL7R/IL12RB1/FCGR2B/HLA-E/B2M/IL12B/HLA-F/HLA-DRA	13
BP	GO:2000516	positive regulation of CD4-positive, alpha-beta T cell activation	13/982	39/18723	4.76965e-08	7.17745e-07	4.98655e-07	SASH3/NCKAP1L/PRKCQ/CCL19/CD86/IFNG/IL12RB1/ANXA1/HLX/IL12B/FOXP3/CD83/HLA-DRA	13
BP	GO:0032956	regulation of actin cytoskeleton organization	45/982	358/18723	4.97459e-08	7.4647e-07	5.18612e-07	WAS/MET/HCLS1/NCKAP1L/GPR65/RHOH/CORO1A/GMFG/PLEK/CCR7/S1PR1/STAP1/EVL/CDC42EP1/RASA1/CDC42EP3/PTK2B/LIMK1/TEK/CXCL12/COTL1/CCL21/HCK/NRP1/PTGER4/GRB2/CSF1R/S100A10/PAM/RAC2/CX3CL1/CYFIP2/IQGAP2/FER/CCDC88A/FLNA/FCHSD2/BST1/RHOG/LRP1/CCL11/GSN/CDC42EP4/IQGAP1/SH3BP1	45
BP	GO:0052548	regulation of endopeptidase activity	51/982	432/18723	5.0906e-08	7.61726e-07	5.29211e-07	CD27/CARD8/LCK/P2RX1/LAPTM5/CR1/FASLG/BCL10/MICAL1/ARRB2/CST6/LAMP3/APLP2/LXN/SERPING1/SYK/ANXA2/TNFSF14/CST7/JAK2/CASP1/A2M/CAST/CSTA/FYN/ITIH5/SNCA/C3/NAIP/SERPINB9/CYFIP2/MEFV/PSMB9/TNF/APP/NLRP1/MUL1/SERPINB1/EFNA3/RPS6KA3/MMP9/HSF1/CASP10/RENBP/HIP1/GSN/TFPI/NLE1/PML/ROBO1/S100A8	51
BP	GO:0045920	negative regulation of exocytosis	12/982	33/18723	5.16473e-08	7.70647e-07	5.35409e-07	NCKAP1L/CD84/CCR2/FCGR2B/HMOX1/FOXF1/ANXA1/CD300A/SNCA/SPI1/HLA-F/IL13RA2	12
BP	GO:0045637	regulation of myeloid cell differentiation	32/982	210/18723	5.32099e-08	7.91739e-07	5.50063e-07	EVI2B/HCLS1/NCKAP1L/LILRB1/TLR4/GPR171/LILRB4/RASSF2/LILRB3/CD4/INPP5D/CCR1/IFNG/MAFB/PTK2B/ZFP36L1/B2M/STAT1/GPR137B/TYROBP/IL12B/ETS1/CAMK4/SPI1/TNF/HSF1/JAG1/MEIS1/HOXA5/THPO/CLDN18/RB1	32
BP	GO:2000107	negative regulation of leukocyte apoptotic process	14/982	46/18723	5.39756e-08	8.00889e-07	5.5642e-07	CCL5/HCLS1/CD27/LILRB1/PRKCQ/CCR7/IL7R/CCL19/BCL10/CXCL12/CCL21/JAK3/NOD2/CXCR2	14
BP	GO:0002430	complement receptor mediated signaling pathway	8/982	13/18723	5.66197e-08	8.37783e-07	5.82052e-07	CMKLR1/CR1/FPR3/C5AR1/CR2/FPR1/C3AR1/FPR2	8
BP	GO:0071902	positive regulation of protein serine/threonine kinase activity	31/982	200/18723	5.75139e-08	8.48649e-07	5.89601e-07	TLR4/PIK3CG/CCL19/IFNG/STK4/SPRY2/PIK3R5/PTK2B/PDGFC/FLT3/TCL1A/FGD2/CCND2/SYK/ADAM8/CSF1R/SNCA/MAP2K6/CAB39/PTPN1/RASGRP1/TNF/CDKN1B/CSK/NOD2/RALB/TLR6/ADRB2/MAP3K13/IQGAP1/ROBO1	31
BP	GO:1902106	negative regulation of leukocyte differentiation	21/982	102/18723	5.92949e-08	8.71287e-07	6.05329e-07	LILRB1/TLR4/FGL2/LILRB4/RUNX3/LILRB3/CR1/INPP5D/TBX21/LAG3/CTLA4/FCGR2B/MAFB/TMEM176B/IRF1/ANXA1/JAK3/GPR137B/HLX/FOXP3/CLDN18	21
BP	GO:0014066	regulation of phosphatidylinositol 3-kinase signaling	22/982	111/18723	5.93761e-08	8.71287e-07	6.05329e-07	NCF1/PPP1R16B/CCL5/HCLS1/FGR/SEMA4D/PTPN6/PDGFC/FLT3/CD28/TEK/JAK2/FYN/RASGRP1/TNF/DCN/TGFB2/PIK3IP1/CAT/ROR1/NEDD4/ANGPT1	22
BP	GO:0042326	negative regulation of phosphorylation	47/982	385/18723	6.19304e-08	9.06265e-07	6.2963e-07	PTPRC/LAX1/LILRB4/RASSF2/STAP1/SAMSN1/APOE/DUSP6/SEMA4D/MICAL1/ARRB2/IFNG/HHEX/SPRY2/PTPN6/TNFAIP3/HEG1/GADD45A/CBFA2T3/SH2B3/SIRPA/CD300A/CTDSPL/FBLN1/SNCA/CAMK2N1/KAT2B/PTPN1/DUSP7/CDKN1B/FABP4/TAF7/CEBPA/CSK/PIK3IP1/LRP5/LRP1/PPARGC1A/PTPN22/DVL1/PDE4D/IRAK3/MVP/ANGPT1/RB1/DBNDD1/LRRK1	47
BP	GO:0044403	biological process involved in symbiotic interaction	39/982	290/18723	6.42812e-08	9.38082e-07	6.51735e-07	SLAMF1/CCL5/ITGB7/CXCR4/APOE/ITGA2/CR1/CD4/CCL4/SELPLG/CD86/CCR5/EPHA2/EFNB2/SIGLEC1/TNFRSF14/NRP1/DPP4/PHB/CR2/TNFRSF4/ITGB5/FCN1/CIITA/LY6E/SERPINB9/CCL8/TRIM22/CD209/CLDN1/CAV2/SFTPD/BCL2L1/CTSB/UVRAG/SCARB2/GSN/SIVA1/PML	39
BP	GO:0032418	lysosome localization	18/982	77/18723	6.69445e-08	9.74272e-07	6.76878e-07	BTK/PTGDS/PIK3CG/FGR/CD84/PTGDR/HMOX1/PIK3CD/FOXF1/SYK/LAT/CD300A/RAC2/RASGRP1/FER/IL13RA2/C12orf4/PLEKHM1	18
BP	GO:0052547	regulation of peptidase activity	53/982	461/18723	6.71517e-08	9.74618e-07	6.77118e-07	CD27/CARD8/LCK/P2RX1/LAPTM5/CR1/FASLG/BCL10/MICAL1/ARRB2/CST6/LAMP3/APLP2/LXN/SERPING1/SYK/ANXA2/TNFSF14/CST7/JAK2/CASP1/A2M/CAST/CSTA/FYN/FBLN1/ITIH5/SNCA/C3/NAIP/SERPINB9/CYFIP2/MEFV/PSMB9/TNF/APP/NLRP1/MUL1/SERPINB1/EFNA3/RPS6KA3/MMP9/HSF1/LRP1/CASP10/RENBP/HIP1/GSN/TFPI/NLE1/PML/ROBO1/S100A8	53
BP	GO:0050688	regulation of defense response to virus	17/982	69/18723	6.75122e-08	9.7718e-07	6.78898e-07	LILRB1/FGL2/IL12RB1/APOBEC3G/TNFAIP3/TSPAN32/SEC14L1/STAT1/IL12B/TRAF3/RNF125/FOXP3/TRAF3IP2/MUL1/PTPN22/IL15/APOBEC3F	17
BP	GO:0002526	acute inflammatory response	22/982	112/18723	7.02841e-08	1.01437e-06	7.04735e-07	CD6/PLA2G2D/CCR7/BTK/PIK3CG/ACVR1/DNASE1L3/CD163/FCGR2B/HLA-E/OSMR/ADORA1/ADAM8/EDNRB/C3/PRCP/VCAM1/TNF/CXCR2/FUT7/S100A8/EIF2AK1	22
BP	GO:0001894	tissue homeostasis	37/982	268/18723	7.04634e-08	1.01437e-06	7.04735e-07	SASH3/PECAM1/TLR4/CORO1A/S1PR1/INPP5D/CCR2/ACP5/PTK2B/TNFAIP3/B2M/JAM2/SYK/LDB2/LYZ/SNX10/ADAM8/CSF1R/GPR137B/P2RX7/LIPA/CDH3/RAC2/CLDN1/SFTPD/CSK/CD34/NOD2/MKS1/ADRB2/PLEKHM1/CALCA/CLDN18/ANGPT1/RB1/MUC13/LRRK1	37
BP	GO:0050853	B cell receptor signaling pathway	24/982	131/18723	7.33931e-08	1.05369e-06	7.32052e-07	PTPRC/PRKCB/ITK/MS4A1/NCKAP1L/CD79B/LPXN/LCK/PLCG2/BTK/STAP1/CD22/PLCL2/BLNK/BANK1/CTLA4/FCGR2B/PRKCH/PTPN6/PIK3CD/SYK/CD300A/MNDA/PTPN22	24
BP	GO:0002313	mature B cell differentiation involved in immune response	11/982	28/18723	7.36174e-08	1.05406e-06	7.3231e-07	IRF8/PLCG2/MFNG/ITM2A/CR1/FCGR2B/PTK2B/DOCK10/GPR183/IL10/SPI1	11
BP	GO:0051651	maintenance of location in cell	32/982	214/18723	8.35488e-08	1.19304e-06	8.28869e-07	PTPRC/LCK/CORO1A/CCR7/PLCG2/APOE/CD4/FASLG/CCL19/CXCL9/CCR5/PTPN6/PTK2B/ANXA6/SRGN/CXCL10/CCL21/SNCA/CX3CL1/ANK3/CXCL11/ITPR1/INSIG2/CCDC88A/MCOLN1/RASA3/UVRAG/PDE4D/GSN/PML/HSP90B1/S100A8	32
BP	GO:0002501	peptide antigen assembly with MHC protein complex	9/982	18/18723	9.16936e-08	1.29887e-06	9.02394e-07	HLA-DOB/B2M/HLA-DMB/HLA-DOA/HLA-DPB1/HLA-DPA1/HLA-DMA/HLA-DRA/TAPBPL	9
BP	GO:0002923	regulation of humoral immune response mediated by circulating immunoglobulin	9/982	18/18723	9.16936e-08	1.29887e-06	9.02394e-07	PTPRC/CR1/LTA/FCGR2B/PTPN6/CR2/FCER2/TNF/NOD2	9
BP	GO:0030889	negative regulation of B cell proliferation	9/982	18/18723	9.16936e-08	1.29887e-06	9.02394e-07	BTK/INPP5D/CTLA4/FCGR2B/CD300A/IL10/TYROBP/ATM/MNDA	9
BP	GO:1903306	negative regulation of regulated secretory pathway	10/982	23/18723	9.21342e-08	1.30164e-06	9.04319e-07	NCKAP1L/CD84/CCR2/FCGR2B/HMOX1/FOXF1/CD300A/SPI1/HLA-F/IL13RA2	10
BP	GO:1905521	regulation of macrophage migration	13/982	41/18723	9.38141e-08	1.32186e-06	9.18364e-07	SLAMF1/CCL5/CMKLR1/STAP1/SLAMF8/PTK2B/CD200/C5AR1/CSF1R/C3AR1/CX3CL1/MMP28/RARRES2	13
BP	GO:0001933	negative regulation of protein phosphorylation	43/982	342/18723	9.78373e-08	1.37142e-06	9.52797e-07	PTPRC/LAX1/LILRB4/RASSF2/SAMSN1/APOE/DUSP6/SEMA4D/MICAL1/ARRB2/IFNG/HHEX/SPRY2/PTPN6/TNFAIP3/HEG1/GADD45A/SH2B3/SIRPA/CD300A/CTDSPL/FBLN1/SNCA/CAMK2N1/KAT2B/PTPN1/DUSP7/CDKN1B/FABP4/TAF7/CEBPA/LRP5/LRP1/PPARGC1A/PTPN22/DVL1/PDE4D/IRAK3/MVP/ANGPT1/RB1/DBNDD1/LRRK1	43
BP	GO:0051091	positive regulation of DNA-binding transcription factor activity	36/982	260/18723	9.81108e-08	1.37142e-06	9.52797e-07	PRKCB/IL18RAP/HCLS1/TLR4/PRKCQ/PLCG2/BTK/BCL10/IL1RAP/CD40LG/PRKCH/PPP3CA/JAK2/CD200/CD36/ANXA3/ADAM8/IL10/ARID5B/CX3CL1/WNT2/TRIM22/TNF/APP/FER/NOD2/LRP5/IL18R1/CAT/HSF1/TLR6/ROR1/PPARGC1A/MAP3K13/IRAK3/S100A8	36
BP	GO:0002673	regulation of acute inflammatory response	14/982	48/18723	9.83642e-08	1.37142e-06	9.52797e-07	PLA2G2D/CCR7/BTK/PIK3CG/DNASE1L3/FCGR2B/HLA-E/OSMR/ADORA1/ADAM8/EDNRB/C3/TNF/FUT7	14
BP	GO:0002686	negative regulation of leukocyte migration	14/982	48/18723	9.83642e-08	1.37142e-06	9.52797e-07	GPR18/STAP1/SLAMF8/HMOX1/CXCL12/CD200/CCL21/ADORA1/PTGER4/CD300A/DPP4/MMP28/IL27RA/CCL2	14
BP	GO:0070555	response to interleukin-1	25/982	143/18723	1.02559e-07	1.42616e-06	9.90827e-07	CCL5/ZBP1/CCL4/CCL19/KMO/SIRPA/CCL21/PTGIS/ANXA1/GBP1/SNCA/HNMT/CCL18/CX3CL1/CCL8/ETS1/KLF2/APP/RORA/CCL11/CCL2/IRAK4/TFPI/IRAK3/CCL17	25
BP	GO:0046777	protein autophosphorylation	33/982	227/18723	1.0447e-07	1.44893e-06	1.00665e-06	PTPRC/ITK/ZAP70/MAP4K1/BTK/RASSF2/FGR/STK10/STK4/GPNMB/PTK2B/PDGFC/FLT3/TEK/SYK/JAK2/HCK/MAPKAPK3/CSF1R/FYN/TXK/ATM/MAP3K3/CAMK4/FER/CSK/ACE/STK17B/MAP3K13/IRAK3/IQGAP1/MVP/EIF2AK1	33
BP	GO:0045824	negative regulation of innate immune response	17/982	71/18723	1.06167e-07	1.46865e-06	1.02035e-06	LILRB1/NR1H3/KLRD1/CR1/CD96/SLAMF8/SAMHD1/ARRB2/TNFAIP3/HLA-E/SERPING1/A2M/SERPINB9/HLA-F/MUL1/VSIG4/IRAK3	17
BP	GO:0046640	regulation of alpha-beta T cell proliferation	12/982	35/18723	1.10181e-07	1.52021e-06	1.05617e-06	PTPRC/ZAP70/CD3E/CCR2/IRF1/EBI3/HLA-E/CD28/TNFRSF14/SYK/IL12B/PTPN22	12
BP	GO:0008360	regulation of cell shape	26/982	154/18723	1.18309e-07	1.62813e-06	1.13115e-06	RHOH/CORO1A/FGR/SEMA4D/CDC42EP1/EPB41L3/RASA1/CDC42EP3/PTK2B/FMNL1/PLEKHO1/FGD2/PLXNC1/HCK/ANXA1/CSF1R/FYN/PALMD/LST1/RAC2/ATP10A/ITGB2/RHOG/CCL11/CCL2/CDC42EP4	26
BP	GO:1903707	negative regulation of hemopoiesis	21/982	106/18723	1.19125e-07	1.63512e-06	1.136e-06	LILRB1/TLR4/FGL2/LILRB4/RUNX3/LILRB3/CR1/INPP5D/TBX21/LAG3/CTLA4/FCGR2B/MAFB/TMEM176B/IRF1/ANXA1/JAK3/GPR137B/HLX/FOXP3/CLDN18	21
BP	GO:0010959	regulation of metal ion transport	48/982	406/18723	1.2055e-07	1.65042e-06	1.14664e-06	IL16/CCL5/LILRB1/CORO1A/PDE4B/PLCG2/LILRB2/P2RX1/CXCR4/PIK3CG/KCNN4/CD4/CD84/CCL4/CXCL9/CCR1/ARRB2/IFNG/PTPN6/PTK2B/KCNAB2/CXCL12/B2M/SLC31A2/TRPV2/CXCL10/STAC/ADORA1/FYN/P2RX7/SNCA/LGALS3/CX3CL1/CAB39/FXYD1/FGF13/ANK3/CXCL11/KCNE4/CD33/FLNA/ADRB2/CCL2/PDE4D/RGS9/PML/NEDD4/BEST1	48
BP	GO:0008154	actin polymerization or depolymerization	32/982	218/18723	1.29485e-07	1.76819e-06	1.22845e-06	WAS/HCLS1/NCKAP1L/WIPF1/CORO1A/GMFG/PLEK/CCR7/PSTPIP1/EVL/MICAL1/CDC42EP1/RASA1/CDC42EP3/PTK2B/CXCL12/COTL1/GAS7/JAK2/CCL21/AIF1/HCK/GRB2/CYFIP2/IQGAP2/MICAL2/FER/FCHSD2/CCL11/GSN/CDC42EP4/SH3BP1	32
BP	GO:0001913	T cell mediated cytotoxicity	14/982	49/18723	1.31105e-07	1.78572e-06	1.24063e-06	PTPRC/NCKAP1L/LILRB1/PRF1/CD1D/KLRD1/IL7R/IL12RB1/FCGR2B/HLA-E/B2M/IL12B/HLA-F/HLA-DRA	14
BP	GO:0043123	positive regulation of I-kappaB kinase/NF-kappaB signaling	29/982	186/18723	1.34455e-07	1.82666e-06	1.26908e-06	PRKCB/TLR4/CCR7/CD4/FASLG/APOL3/CCL19/BCL10/HMOX1/CCL21/CASP1/CD36/FYN/MAP3K14/CX3CL1/TRIM22/SHARPIN/MAP3K3/TRAF3IP2/TNF/WLS/MUL1/FLNA/NOD2/TLR6/ROR1/CASP10/LITAF/IRAK4	29
BP	GO:0032642	regulation of chemokine production	20/982	98/18723	1.42165e-07	1.92649e-06	1.33843e-06	TLR4/LILRB4/CD84/IFNG/EPHA2/HMOX1/TLR7/IL33/SYK/SIRPA/AIF1/CSF1R/IL10/MEFV/TNF/APP/MUL1/IL17RA/NOD2/LRP1	20
BP	GO:0001911	negative regulation of leukocyte mediated cytotoxicity	10/982	24/18723	1.50523e-07	2.02939e-06	1.40992e-06	PTPRC/NCKAP1L/LILRB1/KLRD1/IL7R/ARRB2/FCGR2B/HLA-E/SERPINB9/HLA-F	10
BP	GO:0002922	positive regulation of humoral immune response	10/982	24/18723	1.50523e-07	2.02939e-06	1.40992e-06	PTPRC/CCR7/CR1/LTA/FCGR2B/PHB/C3/FCER2/TNF/NOD2	10
BP	GO:0061756	leukocyte adhesion to vascular endothelial cell	15/982	57/18723	1.55772e-07	2.09483e-06	1.45539e-06	SELL/ITGB7/SELPLG/CCR2/CXCL12/JAM2/ITGA4/CCL21/PTAFR/ETS1/VCAM1/ITGB2/TNF/SPN/FUT7	15
BP	GO:1902905	positive regulation of supramolecular fiber organization	31/982	209/18723	1.59874e-07	2.14457e-06	1.48995e-06	WAS/MET/NCKAP1L/GPR65/CORO1A/GMFG/PLEK/CCR7/EVL/APOE/CDC42EP1/CDC42EP3/PTK2B/LIMK1/CCL21/HCK/NRP1/GRB2/S100A10/CX3CL1/IQGAP2/CDKN1B/APP/FER/CCDC88A/FLNA/FCHSD2/CCL11/GSN/CDC42EP4/RB1	31
BP	GO:0002396	MHC protein complex assembly	9/982	19/18723	1.66099e-07	2.21689e-06	1.54019e-06	HLA-DOB/B2M/HLA-DMB/HLA-DOA/HLA-DPB1/HLA-DPA1/HLA-DMA/HLA-DRA/TAPBPL	9
BP	GO:0048245	eosinophil chemotaxis	9/982	19/18723	1.66099e-07	2.21689e-06	1.54019e-06	CCL5/CCL4/CCL21/HRH1/LGALS3/CX3CL1/CCL8/CCL11/CCL2	9
BP	GO:0032602	chemokine production	20/982	99/18723	1.69491e-07	2.24604e-06	1.56044e-06	TLR4/LILRB4/CD84/IFNG/EPHA2/HMOX1/TLR7/IL33/SYK/SIRPA/AIF1/CSF1R/IL10/MEFV/TNF/APP/MUL1/IL17RA/NOD2/LRP1	20
BP	GO:0007254	JNK cascade	27/982	167/18723	1.69959e-07	2.24604e-06	1.56044e-06	NCF1/SLAMF1/MAP4K1/CD27/ARHGEF6/TLR4/CCR7/RASSF2/CCL19/FCGR2B/PTK2B/CYLD/TLR7/GADD45A/SIRPA/CCL21/PTGER4/TRAF3/TRAF4/RASGRP1/TNF/APP/NOD2/SDCBP/PTPN22/MAP3K13/IRAK4	27
BP	GO:0019886	antigen processing and presentation of exogenous peptide antigen via MHC class II	11/982	30/18723	1.69975e-07	2.24604e-06	1.56044e-06	CTSS/HLA-DOB/FCGR2B/FCER1G/B2M/HLA-DMB/HLA-DOA/HLA-DPB1/HLA-DPA1/HLA-DMA/HLA-DRA	11
BP	GO:0045577	regulation of B cell differentiation	11/982	30/18723	1.69975e-07	2.24604e-06	1.56044e-06	NCKAP1L/CD27/BTK/CR1/SLAMF8/INPP5D/PTPN6/ZFP36L1/SYK/IKZF3/IL10	11
BP	GO:0038093	Fc receptor signaling pathway	14/982	50/18723	1.73359e-07	2.28507e-06	1.58756e-06	PTPRC/PRKCQ/PLCG2/BTK/FGR/FCGR2B/LIMK1/FCER1G/SYK/LILRA4/HCK/FYN/VAV1/FER	14
BP	GO:0002262	myeloid cell homeostasis	26/982	157/18723	1.75849e-07	2.31216e-06	1.60638e-06	IKZF1/HCLS1/NCKAP1L/PDE4B/INPP5D/CCR2/MAFB/HMOX1/PIK3CD/ZFP36L1/B2M/SH2B3/JAK2/ANXA1/JAK3/STAT1/ETS1/BPGM/FOXP3/KLF2/SPI1/TRAF3IP2/CXCR2/HOXA5/TGFBR3/RB1	26
BP	GO:0062149	detection of stimulus involved in sensory perception of pain	10/982	25/18723	2.39089e-07	3.129e-06	2.17388e-06	CXCR4/ITGA2/ARRB2/LXN/CXCL12/ADORA1/FYN/SCN1A/ANO1/CALCA	10
BP	GO:0043254	regulation of protein-containing complex assembly	49/982	428/18723	2.39151e-07	3.129e-06	2.17388e-06	WAS/MET/HCLS1/NCKAP1L/CARD8/TLR4/CORO1A/GMFG/PLEK/CCR7/PLCG2/CXCL13/EVL/APOE/LCP1/CDC42EP1/IFNG/RASA1/CDC42EP3/PTK2B/TCL1A/SYK/CSF2/COTL1/CCL21/HCK/CD36/PTGER4/GRB2/ATM/SNCA/LGALS3/SKAP1/CYFIP2/IQGAP2/MEFV/ABCA1/TNF/CDKN1B/FER/FCHSD2/RALB/HSF1/TLR6/PREB/CCL11/GSN/CDC42EP4/RB1	49
BP	GO:0060402	calcium ion transport into cytosol	26/982	160/18723	2.58445e-07	3.37312e-06	2.34349e-06	PTPRC/MS4A1/LCK/CORO1A/CCR7/PLCG2/P2RX1/FASLG/CCL19/CXCL9/CCR5/PTPN6/PTK2B/TRPV2/CXCL10/CCL21/FYN/P2RX7/SNCA/CX3CL1/CXCL11/ITPR1/MCOLN1/RASA3/PDE4D/PML	26
BP	GO:1904019	epithelial cell apoptotic process	22/982	121/18723	2.92438e-07	3.80743e-06	2.64522e-06	PIK3CG/FASLG/ARRB2/STK4/CD40LG/HMOX1/TNFAIP3/ZFP36L1/TEK/ITGA4/JAK2/CAST/IL10/FGA/TNF/BCL2L1/PAK4/PPARGC1A/CCL2/GSN/ANGPT1/RB1	22
BP	GO:0051495	positive regulation of cytoskeleton organization	32/982	226/18723	2.99682e-07	3.8922e-06	2.70411e-06	WAS/MET/HCLS1/NCKAP1L/GPR65/CORO1A/GMFG/PLEK/CCR7/STAP1/EVL/CDC42EP1/CDC42EP3/PTK2B/LIMK1/TEK/CCL21/HCK/NRP1/GRB2/S100A10/P2RX7/CX3CL1/IQGAP2/CDKN1B/FER/CCDC88A/FLNA/FCHSD2/CCL11/GSN/CDC42EP4	32
BP	GO:0019233	sensory perception of pain	20/982	103/18723	3.34071e-07	4.32826e-06	3.00707e-06	CXCR4/ITGA2/CCR2/ARRB2/LXN/CXCL12/ADORA1/EDNRB/FYN/IL10/P2RX7/PTAFR/IL12B/MGLL/HOXD1/SCN1A/ANO1/NIPSNAP1/CCL2/CALCA	20
BP	GO:0002377	immunoglobulin production	31/982	216/18723	3.37948e-07	4.36783e-06	3.03456e-06	PTPRC/SASH3/BTK/CD22/CR1/TBX21/CD86/SAMHD1/HLA-DOB/CD40LG/FCGR2B/HLA-E/CD28/B2M/PARP3/PHB/IL10/TNFRSF4/HLA-DMB/HLA-DOA/FOXP3/TRAF3IP2/TNF/HLA-DPB1/HLA-DPA1/CCR6/HLA-DMA/DNAJB9/IL13RA2/IL27RA/HLA-DRA	31
BP	GO:0051208	sequestering of calcium ion	22/982	122/18723	3.39379e-07	4.37569e-06	3.04002e-06	PTPRC/LCK/CORO1A/CCR7/PLCG2/FASLG/CCL19/CXCL9/CCR5/PTPN6/PTK2B/ANXA6/CXCL10/CCL21/SNCA/CX3CL1/CXCL11/ITPR1/MCOLN1/RASA3/PDE4D/HSP90B1	22
BP	GO:0051092	positive regulation of NF-kappaB transcription factor activity	25/982	152/18723	3.45432e-07	4.44294e-06	3.08674e-06	PRKCB/IL18RAP/TLR4/PRKCQ/PLCG2/BTK/BCL10/IL1RAP/CD40LG/PRKCH/CD36/ADAM8/CX3CL1/TRIM22/TNF/APP/FER/NOD2/IL18R1/CAT/TLR6/ROR1/MAP3K13/IRAK3/S100A8	25
BP	GO:0050857	positive regulation of antigen receptor-mediated signaling pathway	10/982	26/18723	3.7028e-07	4.75104e-06	3.3008e-06	PTPRC/PRKCB/TRAT1/LCK/CCR7/CD226/STAP1/KCNN4/BCL10/PRKCH	10
BP	GO:0048661	positive regulation of smooth muscle cell proliferation	20/982	104/18723	3.93505e-07	5.03686e-06	3.49938e-06	CCL5/TLR4/S1PR1/ITGA2/EREG/CALCRL/HMOX1/HPGD/JAK2/AIF1/PHB/STAT1/IL10/CX3CL1/PTAFR/ADAMTS1/TNF/MMP9/PPARGC1A/IRAK4	20
BP	GO:0033630	positive regulation of cell adhesion mediated by integrin	9/982	21/18723	4.80425e-07	6.10531e-06	4.24168e-06	CCL5/NCKAP1L/CD3E/CXCL13/PTPN6/SYK/CCL21/SKAP1/TGFB2	9
BP	GO:0051767	nitric-oxide synthase biosynthetic process	9/982	21/18723	4.80425e-07	6.10531e-06	4.24168e-06	TLR4/IFNG/IL33/JAK2/STAT1/FCER2/MAP2K6/NOD2/CCL2	9
BP	GO:0051769	regulation of nitric-oxide synthase biosynthetic process	9/982	21/18723	4.80425e-07	6.10531e-06	4.24168e-06	TLR4/IFNG/IL33/JAK2/STAT1/FCER2/MAP2K6/NOD2/CCL2	9
BP	GO:0002399	MHC class II protein complex assembly	8/982	16/18723	4.91442e-07	6.18612e-06	4.29782e-06	HLA-DOB/B2M/HLA-DMB/HLA-DOA/HLA-DPB1/HLA-DPA1/HLA-DMA/HLA-DRA	8
BP	GO:0002503	peptide antigen assembly with MHC class II protein complex	8/982	16/18723	4.91442e-07	6.18612e-06	4.29782e-06	HLA-DOB/B2M/HLA-DMB/HLA-DOA/HLA-DPB1/HLA-DPA1/HLA-DMA/HLA-DRA	8
BP	GO:0002921	negative regulation of humoral immune response	8/982	16/18723	4.91442e-07	6.18612e-06	4.29782e-06	CR1/FCGR2B/PTPN6/SERPING1/A2M/CR2/CD59/VSIG4	8
BP	GO:1905153	regulation of membrane invagination	8/982	16/18723	4.91442e-07	6.18612e-06	4.29782e-06	NCKAP1L/PLCG2/STAP1/ITGA2/CD36/CD300A/SYT11/C3	8
BP	GO:0043281	regulation of cysteine-type endopeptidase activity involved in apoptotic process	30/982	209/18723	5.19118e-07	6.51904e-06	4.52912e-06	CD27/CARD8/LCK/P2RX1/LAPTM5/FASLG/BCL10/MICAL1/ARRB2/LAMP3/SYK/TNFSF14/JAK2/CASP1/SNCA/NAIP/SERPINB9/TNF/NLRP1/MUL1/RPS6KA3/MMP9/HSF1/CASP10/HIP1/GSN/NLE1/PML/ROBO1/S100A8	30
BP	GO:0002431	Fc receptor mediated stimulatory signaling pathway	11/982	33/18723	5.2079e-07	6.52461e-06	4.53299e-06	PTPRC/CD226/FGR/FCGR2B/LIMK1/FCER1G/SYK/HCK/FYN/VAV1/CSK	11
BP	GO:0051924	regulation of calcium ion transport	34/982	255/18723	5.4468e-07	6.80786e-06	4.72978e-06	IL16/CCL5/LILRB1/CORO1A/PDE4B/PLCG2/LILRB2/P2RX1/CXCR4/PIK3CG/CD4/CD84/CCL4/CXCL9/CCR1/ARRB2/PTPN6/PTK2B/CXCL12/TRPV2/CXCL10/STAC/FYN/P2RX7/SNCA/LGALS3/CX3CL1/CXCL11/CD33/CCL2/PDE4D/RGS9/PML/BEST1	34
BP	GO:0002825	regulation of T-helper 1 type immune response	10/982	27/18723	5.60494e-07	6.97271e-06	4.84431e-06	SLAMF1/CCL19/CCR2/IL12RB1/ANXA1/JAK3/HLX/IL12B/IL18R1/IL27RA	10
BP	GO:0036037	CD8-positive, alpha-beta T cell activation	10/982	27/18723	5.60494e-07	6.97271e-06	4.84431e-06	GPR18/NCKAP1L/LILRB1/LILRB4/RUNX3/CRTAM/TNFSF8/IRF1/HLA-E/PTPN22	10
BP	GO:0051283	negative regulation of sequestering of calcium ion	21/982	116/18723	5.83717e-07	7.24464e-06	5.03323e-06	PTPRC/LCK/CORO1A/CCR7/PLCG2/FASLG/CCL19/CXCL9/CCR5/PTPN6/PTK2B/ANXA6/CXCL10/CCL21/SNCA/CX3CL1/CXCL11/ITPR1/MCOLN1/RASA3/PDE4D	21
BP	GO:0007160	cell-matrix adhesion	32/982	233/18723	6.0113e-07	7.43851e-06	5.16793e-06	ITGAL/CD3E/CCR7/ITGB7/ITGA2/CD96/RASA1/PTK2B/SIGLEC1/TEK/LYVE1/ITGA4/ACVRL1/CCL21/NRP1/CD36/ITGB5/S100A10/FBLN5/PLAU/SKAP1/CX3CL1/VCAM1/FGA/ITGB2/PLEKHA2/ITGA8/CD34/BST1/JAG1/LRP1/IQGAP1	32
BP	GO:0090130	tissue migration	43/982	365/18723	6.02139e-07	7.43851e-06	5.16793e-06	MET/LPXN/PLCG2/CXCL13/CARD10/EVL/PIK3CG/APOE/ITGA2/STAT5A/ZEB2/ENPP2/IFNG/EPHA2/HMOX1/PTK2B/EFNB2/PIK3CD/GADD45A/TEK/FOXF1/VASH1/ACVRL1/CYP1B1/NRP1/ANXA3/ANXA1/DPP4/PTPRG/PRCP/ETS1/MAP3K3/TNF/DCN/TGFB2/CCR6/S100P/MEOX2/MMP9/GLUL/ROBO1/ANGPT1/SH3BP1	43
BP	GO:0031532	actin cytoskeleton reorganization	20/982	107/18723	6.34572e-07	7.82099e-06	5.43365e-06	HCLS1/GPR65/GMFG/PLEK/S1PR1/STAP1/PTK2B/PDLIM4/TEK/HCK/NRP1/ANXA1/GRB2/CSF1R/PTPN1/IQGAP2/PHACTR1/FER/FLNA/GSN	20
BP	GO:0002863	positive regulation of inflammatory response to antigenic stimulus	7/982	12/18723	6.7127e-07	8.25413e-06	5.73458e-06	CCR7/BTK/LTA/HLA-E/CD28/C3/TNF	7
BP	GO:1903531	negative regulation of secretion by cell	24/982	147/18723	6.77741e-07	8.31446e-06	5.77649e-06	TNFRSF1B/NCKAP1L/LILRB1/NR1H3/APOE/CD84/CCR2/FCGR2B/HMOX1/FOXF1/IDH2/PPP3CA/CD200/FRMD4A/ADORA1/ANXA1/CD300A/SYT11/SNCA/IL12B/SPI1/HLA-F/IL13RA2/CRHBP	24
BP	GO:0046330	positive regulation of JNK cascade	18/982	89/18723	6.83919e-07	8.37091e-06	5.81571e-06	NCF1/SLAMF1/CD27/TLR4/CCR7/RASSF2/CCL19/FCGR2B/PTK2B/GADD45A/CCL21/TRAF3/TRAF4/RASGRP1/TNF/APP/NOD2/SDCBP	18
BP	GO:0002495	antigen processing and presentation of peptide antigen via MHC class II	11/982	34/18723	7.33505e-07	8.95719e-06	6.22304e-06	CTSS/HLA-DOB/FCGR2B/FCER1G/B2M/HLA-DMB/HLA-DOA/HLA-DPB1/HLA-DPA1/HLA-DMA/HLA-DRA	11
BP	GO:0031098	stress-activated protein kinase signaling cascade	33/982	247/18723	7.6102e-07	9.27187e-06	6.44166e-06	NCF1/SLAMF1/MAP4K1/CD27/ARHGEF6/TLR4/CCR7/RASSF2/CCL19/FCGR2B/PTK2B/CYLD/ZFP36L1/TLR7/GADD45A/SIRPA/CCL21/PTGER4/MAP2K6/RNF13/TRAF3/TRAF4/RASGRP1/MAP3K3/SPI1/TNF/APP/TGFB2/NOD2/SDCBP/PTPN22/MAP3K13/IRAK4	33
BP	GO:0050860	negative regulation of T cell receptor signaling pathway	9/982	22/18723	7.75196e-07	9.42298e-06	6.54664e-06	SH2D1A/LILRB4/UBASH3A/LAPTM5/PTPN6/PVRIG/GBP1/LGALS3/PTPN22	9
BP	GO:0051282	regulation of sequestering of calcium ion	21/982	118/18723	7.83242e-07	9.49904e-06	6.59948e-06	PTPRC/LCK/CORO1A/CCR7/PLCG2/FASLG/CCL19/CXCL9/CCR5/PTPN6/PTK2B/ANXA6/CXCL10/CCL21/SNCA/CX3CL1/CXCL11/ITPR1/MCOLN1/RASA3/PDE4D	21
BP	GO:0048660	regulation of smooth muscle cell proliferation	27/982	180/18723	7.93006e-07	9.59556e-06	6.66654e-06	CCL5/TLR4/S1PR1/APOE/ITGA2/EREG/IFNG/CALCRL/HMOX1/HPGD/TNFAIP3/JAK2/AIF1/PHB/STAT1/IL10/CX3CL1/PTAFR/IL12B/ADAMTS1/TNF/CDKN1B/GNA12/MMP9/PPARGC1A/IL15/IRAK4	27
BP	GO:0017157	regulation of exocytosis	29/982	202/18723	7.9745e-07	9.60842e-06	6.67548e-06	PRKCB/NCKAP1L/P2RX1/FGR/CD84/CCR2/MICAL1/IFNG/FCGR2B/HMOX1/FOXF1/SYK/ANXA1/CD300A/SYT11/SNCA/RAC2/PTAFR/RAB27B/RAB8B/FGA/ITGB2/SPI1/HLA-F/FER/IL13RA2/SDCBP/DVL1/C12orf4	29
BP	GO:0045670	regulation of osteoclast differentiation	15/982	64/18723	7.97919e-07	9.60842e-06	6.67548e-06	LILRB1/TLR4/LILRB4/RASSF2/LILRB3/INPP5D/CCR1/IFNG/MAFB/GPR137B/TYROBP/IL12B/CAMK4/TNF/CLDN18	15
BP	GO:0070304	positive regulation of stress-activated protein kinase signaling cascade	22/982	128/18723	7.99496e-07	9.60842e-06	6.67548e-06	NCF1/SLAMF1/CD27/TLR4/CCR7/RASSF2/CCL19/FCGR2B/PTK2B/GADD45A/CCL21/RNF13/TRAF3/TRAF4/RASGRP1/MAP3K3/SPI1/TNF/APP/TGFB2/NOD2/SDCBP	22
BP	GO:0046209	nitric oxide metabolic process	17/982	81/18723	8.0217e-07	9.61879e-06	6.68268e-06	TLR4/IFNG/ACP5/PTK2B/SIRPA/JAK2/AIF1/CYP1B1/PTGIS/CD36/IL10/KLF2/TNF/RORA/CD34/TLR6/CPS1	17
BP	GO:0010818	T cell chemotaxis	10/982	28/18723	8.30982e-07	9.89725e-06	6.87614e-06	CCL5/CXCL13/CXCR3/PIK3CG/CCR2/PIK3CD/CXCL10/CCL21/GPR183/CXCL11	10
BP	GO:0031342	negative regulation of cell killing	10/982	28/18723	8.30982e-07	9.89725e-06	6.87614e-06	PTPRC/NCKAP1L/LILRB1/KLRD1/IL7R/ARRB2/FCGR2B/HLA-E/SERPINB9/HLA-F	10
BP	GO:0045589	regulation of regulatory T cell differentiation	10/982	28/18723	8.30982e-07	9.89725e-06	6.87614e-06	LILRB2/LILRB4/CR1/LAG3/IFNG/CTLA4/IRF1/CD28/FOXP3/HLA-DRA	10
BP	GO:0010631	epithelial cell migration	42/982	357/18723	8.42694e-07	1.00143e-05	6.95746e-06	MET/LPXN/PLCG2/CXCL13/CARD10/EVL/PIK3CG/APOE/ITGA2/STAT5A/ZEB2/ENPP2/IFNG/EPHA2/HMOX1/PTK2B/EFNB2/PIK3CD/GADD45A/TEK/VASH1/ACVRL1/CYP1B1/NRP1/ANXA3/ANXA1/DPP4/PTPRG/PRCP/ETS1/MAP3K3/TNF/DCN/TGFB2/CCR6/S100P/MEOX2/MMP9/GLUL/ROBO1/ANGPT1/SH3BP1	42
BP	GO:0045834	positive regulation of lipid metabolic process	24/982	149/18723	8.72344e-07	1.03435e-05	7.18618e-06	CCR7/RAB38/NR1H3/APOE/FGR/ABCD2/CCL19/CAPN2/IFNG/BMP6/PTK2B/FLT3/APOC1/TEK/CCL21/ADORA1/ANXA1/TNF/NOD2/ABCG1/FPR2/PPARGC1A/CREBL2/AGAP2	24
BP	GO:0045807	positive regulation of endocytosis	19/982	100/18723	9.27632e-07	1.09746e-05	7.62461e-06	NCKAP1L/PLCG2/STAP1/APOE/ITGA2/CCL19/ARRB2/CD14/B2M/SYK/ANXA2/PPP3CA/CCL21/CD36/SNCA/C3/LRP1/HIP1/ANGPT1	19
BP	GO:0030225	macrophage differentiation	13/982	49/18723	9.45396e-07	1.11599e-05	7.75336e-06	HCLS1/CD4/IFNG/CSF2/CSF1R/SPI1/APP/CEBPA/MMP9/HSF1/IL15/RB1/EIF2AK1	13
BP	GO:2001057	reactive nitrogen species metabolic process	17/982	82/18723	9.63096e-07	1.13436e-05	7.881e-06	TLR4/IFNG/ACP5/PTK2B/SIRPA/JAK2/AIF1/CYP1B1/PTGIS/CD36/IL10/KLF2/TNF/RORA/CD34/TLR6/CPS1	17
BP	GO:0002720	positive regulation of cytokine production involved in immune response	15/982	65/18723	9.87471e-07	1.15816e-05	8.04632e-06	SLAMF1/SASH3/LILRB1/TLR4/PLCG2/CD226/LAPTM5/BCL10/HLA-E/TNFRSF14/B2M/CD36/HLA-F/NOD2/IL18R1	15
BP	GO:0001959	regulation of cytokine-mediated signaling pathway	24/982	150/18723	9.87791e-07	1.15816e-05	8.04632e-06	PTPRC/CCL5/CARD8/NR1H3/STAP1/CXCR4/GFI1/LAPTM5/ZBP1/SAMHD1/PTPN6/CYLD/TNFAIP3/SH2B3/SYK/SLIT3/CASP1/TXK/PTPN1/SHARPIN/MUL1/IRAK3/ROBO1/ANGPT1	24
BP	GO:0060401	cytosolic calcium ion transport	27/982	182/18723	9.89839e-07	1.15816e-05	8.04632e-06	PTPRC/MS4A1/LCK/CORO1A/CCR7/PLCG2/P2RX1/FASLG/CCL19/CXCL9/CCR5/PTPN6/PTK2B/TRPV2/CXCL10/CCL21/FYN/P2RX7/SNCA/CX3CL1/CXCL11/ITPR1/MCOLN1/RASA3/PDE4D/RGS9/PML	27
BP	GO:0002761	regulation of myeloid leukocyte differentiation	21/982	120/18723	1.04338e-06	1.21811e-05	8.46288e-06	EVI2B/HCLS1/LILRB1/TLR4/LILRB4/RASSF2/LILRB3/CD4/INPP5D/CCR1/IFNG/MAFB/ZFP36L1/GPR137B/TYROBP/IL12B/CAMK4/TNF/HSF1/CLDN18/RB1	21
BP	GO:0090132	epithelium migration	42/982	360/18723	1.05183e-06	1.22529e-05	8.51272e-06	MET/LPXN/PLCG2/CXCL13/CARD10/EVL/PIK3CG/APOE/ITGA2/STAT5A/ZEB2/ENPP2/IFNG/EPHA2/HMOX1/PTK2B/EFNB2/PIK3CD/GADD45A/TEK/VASH1/ACVRL1/CYP1B1/NRP1/ANXA3/ANXA1/DPP4/PTPRG/PRCP/ETS1/MAP3K3/TNF/DCN/TGFB2/CCR6/S100P/MEOX2/MMP9/GLUL/ROBO1/ANGPT1/SH3BP1	42
BP	GO:0051403	stress-activated MAPK cascade	32/982	239/18723	1.06308e-06	1.23569e-05	8.58498e-06	NCF1/SLAMF1/MAP4K1/CD27/ARHGEF6/TLR4/CCR7/RASSF2/CCL19/FCGR2B/PTK2B/CYLD/ZFP36L1/TLR7/GADD45A/SIRPA/CCL21/PTGER4/MAP2K6/TRAF3/TRAF4/RASGRP1/MAP3K3/SPI1/TNF/APP/TGFB2/NOD2/SDCBP/PTPN22/MAP3K13/IRAK4	32
BP	GO:0060759	regulation of response to cytokine stimulus	25/982	162/18723	1.17923e-06	1.3677e-05	9.50215e-06	PTPRC/CCL5/CARD8/TLR4/NR1H3/STAP1/CXCR4/GFI1/LAPTM5/ZBP1/SAMHD1/PTPN6/CYLD/TNFAIP3/SH2B3/SYK/SLIT3/CASP1/TXK/PTPN1/SHARPIN/MUL1/IRAK3/ROBO1/ANGPT1	25
BP	GO:0050918	positive chemotaxis	15/982	66/18723	1.21654e-06	1.40789e-05	9.78139e-06	IL16/MET/CCL5/CORO1A/S1PR1/ITGA2/GPNMB/CXCL12/CXCL10/NRP1/LGALS3/CX3CL1/FPR2/LRP1/ANGPT1	15
BP	GO:0048659	smooth muscle cell proliferation	27/982	184/18723	1.23085e-06	1.42137e-05	9.87499e-06	CCL5/TLR4/S1PR1/APOE/ITGA2/EREG/IFNG/CALCRL/HMOX1/HPGD/TNFAIP3/JAK2/AIF1/PHB/STAT1/IL10/CX3CL1/PTAFR/IL12B/ADAMTS1/TNF/CDKN1B/GNA12/MMP9/PPARGC1A/IL15/IRAK4	27
BP	GO:0032677	regulation of interleukin-8 production	19/982	102/18723	1.27126e-06	1.46485e-05	1.01771e-05	PTPRC/CD2/TLR4/TLR8/BCL10/CD244/TLR7/CD14/SYK/TLR1/ANXA1/IL10/CD58/FCN1/TNF/CD33/NOD2/TLR6/PTPN22	19
BP	GO:0097553	calcium ion transmembrane import into cytosol	23/982	142/18723	1.32803e-06	1.52695e-05	1.06085e-05	PTPRC/LCK/CORO1A/CCR7/PLCG2/P2RX1/FASLG/CCL19/CXCL9/CCR5/PTPN6/PTK2B/TRPV2/CXCL10/CCL21/FYN/SNCA/CX3CL1/CXCL11/ITPR1/MCOLN1/RASA3/PDE4D	23
BP	GO:0001659	temperature homeostasis	26/982	174/18723	1.36022e-06	1.56058e-05	1.08422e-05	IRF4/TLR4/NR1H3/CMKLR1/CXCR4/PLCL2/CCR2/PDGFC/SYK/TRPV2/JAK2/CD36/ADORA1/EDNRB/G0S2/MAP2K6/TNF/FABP4/PLCL1/IL18R1/HSF1/PPARGC1A/ADRB2/IL15/RB1/ATF4	26
BP	GO:0001768	establishment of T cell polarity	7/982	13/18723	1.38836e-06	1.58602e-05	1.10189e-05	DOCK2/CCR7/CCL19/CRTAM/CCL21/TRAF3IP2/GSN	7
BP	GO:0051709	regulation of killing of cells of other organism	7/982	13/18723	1.38836e-06	1.58602e-05	1.10189e-05	PRF1/IFNG/SYK/P2RX7/SERPINB9/FCER2/BCL2L1	7
BP	GO:0002504	antigen processing and presentation of peptide or polysaccharide antigen via MHC class II	11/982	36/18723	1.39838e-06	1.59403e-05	1.10746e-05	CTSS/HLA-DOB/FCGR2B/FCER1G/B2M/HLA-DMB/HLA-DOA/HLA-DPB1/HLA-DPA1/HLA-DMA/HLA-DRA	11
BP	GO:0110053	regulation of actin filament organization	35/982	278/18723	1.4567e-06	1.65696e-05	1.15117e-05	WAS/MET/HCLS1/NCKAP1L/GPR65/CORO1A/GMFG/PLEK/CCR7/S1PR1/EVL/CDC42EP1/RASA1/CDC42EP3/PTK2B/LIMK1/CXCL12/COTL1/CCL21/HCK/NRP1/PTGER4/GRB2/S100A10/CX3CL1/CYFIP2/IQGAP2/FER/CCDC88A/FLNA/FCHSD2/CCL11/GSN/CDC42EP4/SH3BP1	35
BP	GO:1901215	negative regulation of neuron death	29/982	208/18723	1.46938e-06	1.66781e-05	1.15872e-05	TNFRSF1B/CORO1A/APOE/ARRB2/RASA1/GPNMB/HMOX1/PTK2B/JAK2/CD200/NRP1/ADAM8/C5AR1/FYN/IL10/SNCA/NAIP/CX3CL1/HLA-F/GBE1/BCL2L1/CD34/HSF1/LRP1/PPARGC1A/CCL2/ANGPT1/ATF4/AGAP2	29
BP	GO:0032637	interleukin-8 production	19/982	103/18723	1.48325e-06	1.67996e-05	1.16716e-05	PTPRC/CD2/TLR4/TLR8/BCL10/CD244/TLR7/CD14/SYK/TLR1/ANXA1/IL10/CD58/FCN1/TNF/CD33/NOD2/TLR6/PTPN22	19
BP	GO:0038061	NIK/NF-kappaB signaling	23/982	143/18723	1.5054e-06	1.70142e-05	1.18207e-05	CD27/TLR4/RASSF2/CARD10/LAPTM5/CCL19/CD86/CYLD/TLR7/CD14/TNFSF14/PHB/MAP3K14/IL12B/TRAF4/SPI1/TNF/APP/NOD2/IL18R1/TLR6/PTPN22/LITAF	23
BP	GO:0002283	neutrophil activation involved in immune response	8/982	18/18723	1.52061e-06	1.71133e-05	1.18895e-05	DNASE1L3/FCER1G/SYK/ANXA3/TYROBP/PTAFR/ITGB2/SPI1	8
BP	GO:0006957	complement activation, alternative pathway	8/982	18/18723	1.52061e-06	1.71133e-05	1.18895e-05	CR1/CFP/CR2/C3/C7/VSIG4/CFD/CFB	8
BP	GO:0071347	cellular response to interleukin-1	20/982	113/18723	1.56016e-06	1.75213e-05	1.21729e-05	CCL5/ZBP1/CCL4/CCL19/KMO/SIRPA/CCL21/PTGIS/GBP1/CCL18/CX3CL1/CCL8/KLF2/RORA/CCL11/CCL2/IRAK4/TFPI/IRAK3/CCL17	20
BP	GO:0006809	nitric oxide biosynthetic process	16/982	76/18723	1.61206e-06	1.80659e-05	1.25514e-05	TLR4/IFNG/ACP5/PTK2B/SIRPA/JAK2/AIF1/CYP1B1/PTGIS/CD36/IL10/KLF2/TNF/RORA/CD34/TLR6	16
BP	GO:0106106	cold-induced thermogenesis	23/982	144/18723	1.7042e-06	1.90183e-05	1.3213e-05	IRF4/TLR4/NR1H3/CMKLR1/CXCR4/PLCL2/CCR2/PDGFC/SYK/TRPV2/JAK2/CD36/G0S2/MAP2K6/FABP4/PLCL1/IL18R1/HSF1/PPARGC1A/ADRB2/IL15/RB1/ATF4	23
BP	GO:0120161	regulation of cold-induced thermogenesis	23/982	144/18723	1.7042e-06	1.90183e-05	1.3213e-05	IRF4/TLR4/NR1H3/CMKLR1/CXCR4/PLCL2/CCR2/PDGFC/SYK/TRPV2/JAK2/CD36/G0S2/MAP2K6/FABP4/PLCL1/IL18R1/HSF1/PPARGC1A/ADRB2/IL15/RB1/ATF4	23
BP	GO:0043304	regulation of mast cell degranulation	10/982	30/18723	1.72832e-06	1.9247e-05	1.33719e-05	FGR/CD84/HMOX1/FOXF1/SYK/CD300A/RAC2/FER/IL13RA2/C12orf4	10
BP	GO:0045124	regulation of bone resorption	12/982	44/18723	1.7972e-06	1.99305e-05	1.38468e-05	S1PR1/INPP5D/TNFAIP3/SYK/ADAM8/CSF1R/GPR137B/P2RX7/CSK/PLEKHM1/CALCA/CLDN18	12
BP	GO:0150076	neuroinflammatory response	12/982	44/18723	1.7972e-06	1.99305e-05	1.38468e-05	PTPRC/TNFRSF1B/PLCG2/STAP1/IFNG/IL33/CST7/CD200/SYT11/CX3CL1/TNF/MMP9	12
BP	GO:0002438	acute inflammatory response to antigenic stimulus	9/982	24/18723	1.85258e-06	2.03745e-05	1.41553e-05	CD6/PLA2G2D/CCR7/BTK/FCGR2B/HLA-E/C3/CXCR2/FUT7	9
BP	GO:0002755	MyD88-dependent toll-like receptor signaling pathway	9/982	24/18723	1.85258e-06	2.03745e-05	1.41553e-05	TLR4/BTK/TLR8/IRF1/TLR1/CD300A/TLR6/IRAK4/IRAK3	9
BP	GO:0050855	regulation of B cell receptor signaling pathway	9/982	24/18723	1.85258e-06	2.03745e-05	1.41553e-05	PRKCB/LPXN/STAP1/CD22/PLCL2/FCGR2B/PRKCH/CD300A/PTPN22	9
BP	GO:2000310	regulation of NMDA receptor activity	9/982	24/18723	1.85258e-06	2.03745e-05	1.41553e-05	CCR2/IFNG/PTK2B/IFNGR2/APP/PPARGC1A/CCL2/RGS9/CRHBP	9
BP	GO:0032479	regulation of type I interferon production	18/982	95/18723	1.86173e-06	2.03907e-05	1.41665e-05	LILRB1/IRF8/TLR4/PLCG2/TLR8/CYLD/IRF1/TLR7/CD14/SYK/SIRPA/LILRA4/STAT1/IL10/TRAF3/RNF125/IRF5/PTPN22	18
BP	GO:0032606	type I interferon production	18/982	95/18723	1.86173e-06	2.03907e-05	1.41665e-05	LILRB1/IRF8/TLR4/PLCG2/TLR8/CYLD/IRF1/TLR7/CD14/SYK/SIRPA/LILRA4/STAT1/IL10/TRAF3/RNF125/IRF5/PTPN22	18
BP	GO:0030100	regulation of endocytosis	29/982	211/18723	1.97369e-06	2.15725e-05	1.49875e-05	NCKAP1L/LILRB1/PLCG2/NR1H3/STAP1/APOE/CD22/ITGA2/CCL19/ARRB2/APOC1/CD14/B2M/SYK/ANXA2/PPP3CA/CCL21/CD36/CD300A/SYT11/SNCA/C3/LGALS3/PTPN1/SDCBP/LRP1/HIP1/ANGPT1/BMP2K	29
BP	GO:0051209	release of sequestered calcium ion into cytosol	20/982	115/18723	2.07345e-06	2.26164e-05	1.57128e-05	PTPRC/LCK/CORO1A/CCR7/PLCG2/FASLG/CCL19/CXCL9/CCR5/PTPN6/PTK2B/CXCL10/CCL21/SNCA/CX3CL1/CXCL11/ITPR1/MCOLN1/RASA3/PDE4D	20
BP	GO:0006469	negative regulation of protein kinase activity	29/982	212/18723	2.17439e-06	2.36688e-05	1.6444e-05	PTPRC/LAX1/LILRB4/APOE/IFNG/HHEX/SPRY2/PTPN6/TNFAIP3/HEG1/GADD45A/SH2B3/CD300A/SNCA/CAMK2N1/KAT2B/PTPN1/DUSP7/CDKN1B/FABP4/TAF7/CEBPA/LRP5/PTPN22/DVL1/IRAK3/MVP/RB1/DBNDD1	29
BP	GO:1903305	regulation of regulated secretory pathway	22/982	136/18723	2.29299e-06	2.49087e-05	1.73054e-05	PRKCB/NCKAP1L/P2RX1/FGR/CD84/CCR2/MICAL1/FCGR2B/HMOX1/FOXF1/SYK/CD300A/SYT11/RAC2/PTAFR/ITGB2/SPI1/HLA-F/FER/IL13RA2/DVL1/C12orf4	22
BP	GO:2000273	positive regulation of signaling receptor activity	12/982	45/18723	2.33451e-06	2.5308e-05	1.75828e-05	NCF1/EREG/CCR2/IFNG/JAK2/NRP1/ADORA1/IL10/IFNGR2/ADRB2/CCL2/RGS9	12
BP	GO:0032874	positive regulation of stress-activated MAPK cascade	21/982	126/18723	2.36762e-06	2.56146e-05	1.77958e-05	NCF1/SLAMF1/CD27/TLR4/CCR7/RASSF2/CCL19/FCGR2B/PTK2B/GADD45A/CCL21/TRAF3/TRAF4/RASGRP1/MAP3K3/SPI1/TNF/APP/TGFB2/NOD2/SDCBP	21
BP	GO:0033002	muscle cell proliferation	32/982	248/18723	2.39507e-06	2.5859e-05	1.79656e-05	CCL5/TLR4/S1PR1/APOE/ITGA2/EREG/IFNG/CALCRL/HMOX1/HPGD/TNFAIP3/JAK2/AIF1/PHB/STAT1/IL10/CX3CL1/PTAFR/IL12B/WNT2/ADAMTS1/TNF/CDKN1B/TGFB2/GNA12/MMP9/PPARGC1A/IL15/MEIS1/IRAK4/TGFBR3/ANGPT1	32
BP	GO:0033006	regulation of mast cell activation involved in immune response	10/982	31/18723	2.4318e-06	2.62023e-05	1.82041e-05	FGR/CD84/HMOX1/FOXF1/SYK/CD300A/RAC2/FER/IL13RA2/C12orf4	10
BP	GO:0022604	regulation of cell morphogenesis	37/982	309/18723	2.47333e-06	2.65958e-05	1.84775e-05	RHOH/CORO1A/CXCR4/FGR/SEMA4D/CDC42EP1/ENPP2/EPB41L3/RASA1/CDC42EP3/PTK2B/FMNL1/PLEKHO1/FGD2/PLXNC1/HCK/NRP1/ANXA1/GBP1/CSF1R/FYN/PALMD/FBLN1/S100A10/LST1/RAC2/ATP10A/FGA/ITGB2/MUL1/FLNA/RHOG/CCL11/MAP3K13/CCL2/DVL1/CDC42EP4	37
BP	GO:0002888	positive regulation of myeloid leukocyte mediated immunity	8/982	19/18723	2.5057e-06	2.67813e-05	1.86064e-05	BTK/STAP1/HLA-E/TYROBP/C3/PTAFR/ITGB2/SPI1	8
BP	GO:0043031	negative regulation of macrophage activation	8/982	19/18723	2.5057e-06	2.67813e-05	1.86064e-05	PTPRC/NR1H3/FCGR2B/CST7/CD200/SYT11/CX3CL1/VSIG4	8
BP	GO:2001185	regulation of CD8-positive, alpha-beta T cell activation	8/982	19/18723	2.5057e-06	2.67813e-05	1.86064e-05	NCKAP1L/LILRB1/LILRB4/RUNX3/CRTAM/IRF1/HLA-E/PTPN22	8
BP	GO:0072538	T-helper 17 type immune response	11/982	38/18723	2.54277e-06	2.71229e-05	1.88437e-05	LY9/IRF4/PRKCQ/TBX21/IL12RB1/PHB/IL12B/FOXP3/TRAF3IP2/RORA/IL27RA	11
BP	GO:1901216	positive regulation of neuron death	18/982	97/18723	2.54791e-06	2.71233e-05	1.8844e-05	TLR4/FASLG/CAPN2/KMO/IFNG/C1QA/FCGR2B/EFNB2/ADORA1/FYN/TYROBP/SNCA/ITGB2/TNF/TGFB2/CTSZ/TLR6/ATF4	18
BP	GO:0033673	negative regulation of kinase activity	31/982	237/18723	2.57059e-06	2.73099e-05	1.89737e-05	PTPRC/LAX1/LILRB4/APOE/IFNG/HHEX/SPRY2/PTPN6/TNFAIP3/HEG1/GADD45A/SH2B3/CD300A/SNCA/CAMK2N1/KAT2B/PTPN1/DUSP7/CDKN1B/FABP4/TAF7/CEBPA/CSK/PIK3IP1/LRP5/PTPN22/DVL1/IRAK3/MVP/RB1/DBNDD1	31
BP	GO:0001767	establishment of lymphocyte polarity	7/982	14/18723	2.65071e-06	2.79931e-05	1.94483e-05	DOCK2/CCR7/CCL19/CRTAM/CCL21/TRAF3IP2/GSN	7
BP	GO:0001771	immunological synapse formation	7/982	14/18723	2.65071e-06	2.79931e-05	1.94483e-05	CD6/DOCK2/PRF1/CCR7/CCL19/CCL21/LGALS3	7
BP	GO:0002864	regulation of acute inflammatory response to antigenic stimulus	7/982	14/18723	2.65071e-06	2.79931e-05	1.94483e-05	PLA2G2D/CCR7/BTK/FCGR2B/HLA-E/C3/FUT7	7
BP	GO:2001056	positive regulation of cysteine-type endopeptidase activity	23/982	148/18723	2.76319e-06	2.91232e-05	2.02334e-05	CARD8/LCK/P2RX1/LAPTM5/FASLG/BCL10/SYK/JAK2/CASP1/FYN/SNCA/CYFIP2/MEFV/TNF/NLRP1/MUL1/HSF1/CASP10/HIP1/GSN/PML/ROBO1/S100A8	23
BP	GO:0045428	regulation of nitric oxide biosynthetic process	14/982	62/18723	2.98338e-06	3.13816e-05	2.18025e-05	TLR4/IFNG/ACP5/PTK2B/SIRPA/JAK2/AIF1/PTGIS/CD36/IL10/KLF2/TNF/CD34/TLR6	14
BP	GO:0072593	reactive oxygen species metabolic process	31/982	239/18723	3.07098e-06	3.22393e-05	2.23983e-05	NCF1/TLR4/PLCG2/ABCD2/CYBB/ACP5/PTK2B/NCF4/GADD45A/SYK/CYP1B1/CD36/STK17A/GRB2/FYN/TYROBP/AKR1C1/FBLN5/SNCA/RAC2/PRCP/VAV1/ITGB2/TNF/SFTPD/CAT/BST1/TLR6/FPR2/CYB5R4/SESN1	31
BP	GO:0042742	defense response to bacterium	40/982	350/18723	3.16405e-06	3.31508e-05	2.30316e-05	IRF8/TLR4/CXCL13/IL7R/CD4/FGR/SLAMF8/CFP/LTA/STAB1/ACP5/EPHA2/TNFSF8/HLA-E/FCER1G/TNFRSF14/SYK/RNASE6/GNLY/CASP1/LYZ/CD36/ANXA3/C5AR1/IL10/SYT11/NAIP/IL12B/FGA/RARRES2/TNF/OPTN/SFTPD/NLRP1/SPN/NOD2/IL27RA/TLR6/FPR2/S100A8	40
BP	GO:0061515	myeloid cell development	15/982	71/18723	3.24262e-06	3.39071e-05	2.3557e-05	FLI1/EVI2B/NCKAP1L/LILRB1/PTPN6/SH2B3/ANXA2/TYROBP/BPGM/KLF2/APP/MEIS1/THPO/CLDN18/LRRK1	15
BP	GO:0045622	regulation of T-helper cell differentiation	11/982	39/18723	3.37476e-06	3.52195e-05	2.44689e-05	IRF4/CCL19/TBX21/CD86/IL12RB1/ANXA1/JAK3/HLX/IL12B/FOXP3/HLA-DRA	11
BP	GO:0030838	positive regulation of actin filament polymerization	18/982	99/18723	3.45488e-06	3.59145e-05	2.49517e-05	WAS/NCKAP1L/CORO1A/GMFG/CCR7/EVL/CDC42EP1/CDC42EP3/PTK2B/CCL21/HCK/GRB2/IQGAP2/FER/FCHSD2/CCL11/GSN/CDC42EP4	18
BP	GO:0033209	tumor necrosis factor-mediated signaling pathway	18/982	99/18723	3.45488e-06	3.59145e-05	2.49517e-05	TNFRSF1B/CARD8/TNFRSF17/LAPTM5/PTK2B/CYLD/TNFAIP3/TNFRSF14/SYK/JAK2/CASP1/STAT1/TNFRSF4/TRAF3/SHARPIN/TRAF3IP2/TNF/CLDN18	18
BP	GO:0001915	negative regulation of T cell mediated cytotoxicity	6/982	10/18723	3.58937e-06	3.70948e-05	2.57717e-05	PTPRC/NCKAP1L/LILRB1/KLRD1/IL7R/FCGR2B	6
BP	GO:0002291	T cell activation via T cell receptor contact with antigen bound to MHC molecule on antigen presenting cell	6/982	10/18723	3.58937e-06	3.70948e-05	2.57717e-05	ITGAL/LILRB1/FGL2/APBB1IP/HLA-DMB/LGALS3	6
BP	GO:0002524	hypersensitivity	6/982	10/18723	3.58937e-06	3.70948e-05	2.57717e-05	CCR7/BTK/FCGR2B/HLA-E/C3/FUT7	6
BP	GO:0050798	activated T cell proliferation	12/982	47/18723	3.8488e-06	3.96218e-05	2.75274e-05	SLAMF1/LILRB4/CRTAM/IL12RB1/BTN2A2/FYN/BTN3A1/IL12B/PDCD1LG2/FOXP3/IL2RA/IL27RA	12
BP	GO:0097028	dendritic cell differentiation	12/982	47/18723	3.8488e-06	3.96218e-05	2.75274e-05	IRF4/LILRB1/IRF8/CCR7/LILRB2/CCL19/FCGR2B/TMEM176B/FLT3/CSF2/CAMK4/SPI1	12
BP	GO:0070227	lymphocyte apoptotic process	15/982	72/18723	3.89951e-06	4.00661e-05	2.7836e-05	CCL5/CD27/CD3G/PRKCQ/BTK/IL7R/FASLG/BCL10/IDO1/ADAM8/JAK3/IL10/LGALS3/TRAF3IP2/IL2RA	15
BP	GO:0046629	gamma-delta T cell activation	8/982	20/18723	3.98422e-06	4.08575e-05	2.83858e-05	PTPRC/ITK/GPR18/NCKAP1L/LILRB1/SYK/NOD2/SOX4	8
BP	GO:0051897	positive regulation of protein kinase B signaling	20/982	120/18723	4.0929e-06	4.18911e-05	2.9104e-05	MET/HCLS1/CCR7/PIK3CG/CCL19/ARRB2/SPRY2/PIK3R5/PIK3CD/CD28/TEK/CCL21/ADAM8/PHB/CX3CL1/TNF/HIP1/C1QTNF1/THPO/ANGPT1	20
BP	GO:0002714	positive regulation of B cell mediated immunity	11/982	40/18723	4.4355e-06	4.51367e-05	3.13589e-05	PTPRC/BTK/CD226/TBX21/LTA/HLA-E/CD28/C3/FCER2/TNF/NOD2	11
BP	GO:0002891	positive regulation of immunoglobulin mediated immune response	11/982	40/18723	4.4355e-06	4.51367e-05	3.13589e-05	PTPRC/BTK/CD226/TBX21/LTA/HLA-E/CD28/C3/FCER2/TNF/NOD2	11
BP	GO:0150077	regulation of neuroinflammatory response	11/982	40/18723	4.4355e-06	4.51367e-05	3.13589e-05	PTPRC/TNFRSF1B/PLCG2/STAP1/IL33/CST7/CD200/SYT11/CX3CL1/TNF/MMP9	11
BP	GO:0080164	regulation of nitric oxide metabolic process	14/982	64/18723	4.45168e-06	4.52148e-05	3.14131e-05	TLR4/IFNG/ACP5/PTK2B/SIRPA/JAK2/AIF1/PTGIS/CD36/IL10/KLF2/TNF/CD34/TLR6	14
BP	GO:0010632	regulation of epithelial cell migration	35/982	292/18723	4.48997e-06	4.55167e-05	3.16228e-05	MET/PLCG2/CXCL13/CARD10/EVL/PIK3CG/APOE/ITGA2/STAT5A/ENPP2/IFNG/EPHA2/HMOX1/PTK2B/PIK3CD/GADD45A/TEK/VASH1/ACVRL1/NRP1/ANXA3/ANXA1/PTPRG/PRCP/ETS1/MAP3K3/TNF/DCN/TGFB2/CCR6/MEOX2/MMP9/GLUL/ANGPT1/SH3BP1	35
BP	GO:0043552	positive regulation of phosphatidylinositol 3-kinase activity	10/982	33/18723	4.61097e-06	4.66542e-05	3.24131e-05	CCR7/FGR/CCL19/PTK2B/FLT3/TEK/CCL21/NOD2/FPR2/AGAP2	10
BP	GO:0010952	positive regulation of peptidase activity	27/982	197/18723	4.65367e-06	4.69967e-05	3.26511e-05	CARD8/LCK/P2RX1/LAPTM5/CR1/FASLG/BCL10/SYK/JAK2/CASP1/FYN/FBLN1/SNCA/CYFIP2/MEFV/TNF/APP/NLRP1/MUL1/EFNA3/HSF1/CASP10/HIP1/GSN/PML/ROBO1/S100A8	27
BP	GO:0050848	regulation of calcium-mediated signaling	15/982	73/18723	4.67267e-06	4.70991e-05	3.27222e-05	ZAP70/CD3E/TRAT1/PLEK/PLCG2/CMKLR1/CD22/CD4/CCL4/PTK2B/SYK/GBP1/ITPR1/TNF/BST1	15
BP	GO:0051348	negative regulation of transferase activity	33/982	268/18723	4.68791e-06	4.71632e-05	3.27668e-05	PTPRC/LAX1/LILRB4/APOE/IFNG/HHEX/SPRY2/PTPN6/TNFAIP3/HEG1/LIMK1/GADD45A/SH2B3/PARP3/CD300A/SNCA/CAMK2N1/KAT2B/PTPN1/DUSP7/CDKN1B/FABP4/TAF7/CEBPA/CSK/PIK3IP1/LRP5/PTPN22/DVL1/IRAK3/MVP/RB1/DBNDD1	33
BP	GO:0002468	dendritic cell antigen processing and presentation	7/982	15/18723	4.74468e-06	4.73755e-05	3.29142e-05	CCR7/FGL2/CCL19/FCGR2B/CCL21/NOD2/HLA-DRA	7
BP	GO:0023035	CD40 signaling pathway	7/982	15/18723	4.74468e-06	4.73755e-05	3.29142e-05	SLAMF1/CD86/CD40LG/TNFAIP3/PHB/SHARPIN/TRAF3IP2	7
BP	GO:0045346	regulation of MHC class II biosynthetic process	7/982	15/18723	4.74468e-06	4.73755e-05	3.29142e-05	TLR4/IFNG/JAK2/IL10/CIITA/SPI1/TAF7	7
BP	GO:0060099	regulation of phagocytosis, engulfment	7/982	15/18723	4.74468e-06	4.73755e-05	3.29142e-05	NCKAP1L/PLCG2/STAP1/ITGA2/CD36/CD300A/C3	7
BP	GO:0002711	positive regulation of T cell mediated immunity	13/982	56/18723	4.83488e-06	4.81855e-05	3.3477e-05	PTPRC/SLAMF1/SASH3/CD1D/IL12RB1/HLA-E/B2M/IL12B/FOXP3/HLA-F/IL18R1/HLA-DRA/FBXO38	13
BP	GO:0010810	regulation of cell-substrate adhesion	29/982	221/18723	5.03254e-06	5.00615e-05	3.47804e-05	CD3E/CCR7/STK4/RASA1/PTK2B/TEK/FOXF1/JAK2/EGFL6/ACVRL1/CCL21/NRP1/CD36/GBP1/FBLN1/S100A10/PLAU/SKAP1/RAC2/CX3CL1/FGA/PLEKHA2/FLNA/BST1/JAG1/LRP1/EDIL3/IQGAP1/COL8A1	29
BP	GO:0043406	positive regulation of MAP kinase activity	19/982	112/18723	5.41969e-06	5.37115e-05	3.73162e-05	TLR4/PIK3CG/CCL19/PIK3R5/PTK2B/PDGFC/FLT3/FGD2/SYK/ADAM8/PTPN1/RASGRP1/TNF/CSK/NOD2/TLR6/MAP3K13/IQGAP1/ROBO1	19
BP	GO:1901222	regulation of NIK/NF-kappaB signaling	19/982	112/18723	5.41969e-06	5.37115e-05	3.73162e-05	CD27/TLR4/RASSF2/LAPTM5/CCL19/CD86/CYLD/TLR7/CD14/TNFSF14/PHB/IL12B/SPI1/TNF/APP/NOD2/IL18R1/PTPN22/LITAF	19
BP	GO:0051402	neuron apoptotic process	31/982	246/18723	5.61442e-06	5.55378e-05	3.85851e-05	CORO1A/APOE/FASLG/ARRB2/RASA1/HMOX1/PTK2B/JAK2/NRP1/ADAM8/C5AR1/FYN/IL10/TYROBP/SNCA/NAIP/CX3CL1/TNF/GBE1/APP/TGFB2/NLRP1/BCL2L1/CTSZ/LRP1/PPARGC1A/CCL2/ANGPT1/RB1/ATF4/AGAP2	31
BP	GO:0046328	regulation of JNK cascade	21/982	133/18723	5.73661e-06	5.66411e-05	3.93515e-05	NCF1/SLAMF1/CD27/TLR4/CCR7/RASSF2/CCL19/FCGR2B/PTK2B/CYLD/GADD45A/SIRPA/CCL21/TRAF3/TRAF4/RASGRP1/TNF/APP/NOD2/SDCBP/PTPN22	21
BP	GO:0032733	positive regulation of interleukin-10 production	11/982	41/18723	5.77631e-06	5.68218e-05	3.94771e-05	IRF4/SASH3/TLR4/PLCG2/CD40LG/CD28/SYK/IL12B/CD34/NOD2/CD83	11
BP	GO:0050691	regulation of defense response to virus by host	11/982	41/18723	5.77631e-06	5.68218e-05	3.94771e-05	LILRB1/IL12RB1/APOBEC3G/TNFAIP3/STAT1/IL12B/TRAF3IP2/MUL1/PTPN22/IL15/APOBEC3F	11
BP	GO:0043491	protein kinase B signaling	28/982	211/18723	5.86831e-06	5.76201e-05	4.00317e-05	MET/CCL5/HCLS1/CCR7/PIK3CG/CCL19/ARRB2/BANK1/EPHA2/SPRY2/PIK3R5/PIK3CD/ZFP36L1/CD28/TEK/SH2B3/CCL21/ADAM8/PHB/CX3CL1/TNF/MUL1/HIP1/C1QTNF1/CCL2/SETX/THPO/ANGPT1	28
BP	GO:1901653	cellular response to peptide	40/982	359/18723	5.89146e-06	5.77407e-05	4.01155e-05	PRKCB/TLR4/PRKCQ/STAT5A/FCGR2B/ZFP36L1/BCAR3/ITGA4/JAK2/CD36/GRB2/JAK3/FYN/STAT1/MYO5A/KAT2B/PTPN1/VCAM1/RAB8B/KLF2/ANO1/RARRES2/INSIG2/APP/CAV2/FER/CSK/NOD2/LDOC1/HSF1/TLR6/CYSLTR2/CPS1/FPR2/LRP1/ADRB2/PTPN22/TBC1D4/FUT7/CRHBP	40
BP	GO:0010811	positive regulation of cell-substrate adhesion	20/982	123/18723	6.03326e-06	5.8913e-05	4.093e-05	CD3E/CCR7/STK4/PTK2B/TEK/FOXF1/JAK2/EGFL6/CCL21/NRP1/CD36/S100A10/SKAP1/CX3CL1/FGA/PLEKHA2/FLNA/EDIL3/IQGAP1/COL8A1	20
BP	GO:0030168	platelet activation	20/982	123/18723	6.03326e-06	5.8913e-05	4.093e-05	TLR4/LCK/PRKCQ/PLEK/PLCG2/P2RX1/PIK3CG/APOE/CD40LG/PTPN6/TSPAN32/FCER1G/SH2B3/SYK/JAK2/TXK/VAV1/FGA/FLNA/C1QTNF1	20
BP	GO:0030449	regulation of complement activation	8/982	21/18723	6.1404e-06	5.97395e-05	4.15042e-05	CR1/SERPING1/A2M/PHB/CR2/C3/CD59/VSIG4	8
BP	GO:0090026	positive regulation of monocyte chemotaxis	8/982	21/18723	6.1404e-06	5.97395e-05	4.15042e-05	CCL5/PLA2G7/CCR2/CCR1/CXCL12/CXCL10/AIF1/FPR2	8
BP	GO:0043112	receptor metabolic process	24/982	166/18723	6.15341e-06	5.97567e-05	4.15161e-05	LILRB1/TRAT1/PLCG2/LILRB4/LAPTM5/APOE/ARRB2/CALCRL/FCER1G/SYK/ANXA2/CD36/GRB2/SNCA/PTPN1/DNM3/ITGB2/OPTN/SDCBP/CXCR2/LRP1/UVRAG/NEDD4/ANGPT1	24
BP	GO:0045639	positive regulation of myeloid cell differentiation	18/982	103/18723	6.18827e-06	5.99856e-05	4.16751e-05	EVI2B/HCLS1/NCKAP1L/CD4/INPP5D/CCR1/IFNG/ZFP36L1/STAT1/TYROBP/IL12B/ETS1/TNF/HSF1/JAG1/HOXA5/THPO/RB1	18
BP	GO:0098751	bone cell development	10/982	34/18723	6.22658e-06	6.0247e-05	4.18567e-05	FLI1/LILRB1/PTPN6/SH2B3/ANXA2/TYROBP/MEIS1/THPO/CLDN18/LRRK1	10
BP	GO:0010038	response to metal ion	41/982	373/18723	6.31592e-06	6.10003e-05	4.23801e-05	NCF1/PLCG2/RASGRP2/CYBB/BMP6/C1QA/HMOX1/PTK2B/CD14/B2M/HAAO/PPP3CA/SYT11/SNCA/PAM/VCAM1/MT1F/AQP9/KCNMA1/ANK3/MT1E/FGA/CLDN1/CDKN1B/APP/FABP4/CEBPA/MCOLN1/MMP9/CAT/HSF1/CPS1/PPARGC1A/DLG2/CNGA3/IQGAP1/FECH/NEDD4/S100A8/CRHBP/MT2A	41
BP	GO:0043523	regulation of neuron apoptotic process	28/982	212/18723	6.43043e-06	6.19936e-05	4.30702e-05	CORO1A/APOE/FASLG/ARRB2/RASA1/HMOX1/PTK2B/JAK2/NRP1/ADAM8/C5AR1/FYN/IL10/TYROBP/SNCA/NAIP/CX3CL1/TNF/GBE1/TGFB2/BCL2L1/CTSZ/LRP1/PPARGC1A/CCL2/ANGPT1/ATF4/AGAP2	28
BP	GO:0043524	negative regulation of neuron apoptotic process	22/982	145/18723	6.74147e-06	6.48744e-05	4.50717e-05	CORO1A/APOE/ARRB2/RASA1/HMOX1/PTK2B/JAK2/NRP1/ADAM8/C5AR1/FYN/IL10/SNCA/NAIP/CX3CL1/GBE1/BCL2L1/LRP1/PPARGC1A/CCL2/ANGPT1/AGAP2	22
BP	GO:0010950	positive regulation of endopeptidase activity	25/982	179/18723	7.41302e-06	7.12079e-05	4.94719e-05	CARD8/LCK/P2RX1/LAPTM5/CR1/FASLG/BCL10/SYK/JAK2/CASP1/FYN/SNCA/CYFIP2/MEFV/TNF/NLRP1/MUL1/EFNA3/HSF1/CASP10/HIP1/GSN/PML/ROBO1/S100A8	25
BP	GO:0032689	negative regulation of interferon-gamma production	11/982	42/18723	7.45747e-06	7.13767e-05	4.95891e-05	SLAMF1/LILRB1/TLR4/LILRB4/LAPTM5/CR1/CD96/IL10/PDCD1LG2/FOXP3/NOD2	11
BP	GO:0033003	regulation of mast cell activation	11/982	42/18723	7.45747e-06	7.13767e-05	4.95891e-05	CD226/FGR/CD84/HMOX1/FOXF1/SYK/CD300A/RAC2/FER/IL13RA2/C12orf4	11
BP	GO:0002604	regulation of dendritic cell antigen processing and presentation	6/982	11/18723	7.54499e-06	7.18262e-05	4.99014e-05	CCR7/FGL2/CCL19/FCGR2B/CCL21/NOD2	6
BP	GO:0045060	negative thymic T cell selection	6/982	11/18723	7.54499e-06	7.18262e-05	4.99014e-05	PTPRC/DOCK2/ZAP70/CD3E/CCR7/CD28	6
BP	GO:0046643	regulation of gamma-delta T cell activation	6/982	11/18723	7.54499e-06	7.18262e-05	4.99014e-05	PTPRC/NCKAP1L/LILRB1/SYK/NOD2/SOX4	6
BP	GO:1990845	adaptive thermogenesis	23/982	157/18723	7.64131e-06	7.24833e-05	5.0358e-05	IRF4/TLR4/NR1H3/CMKLR1/CXCR4/PLCL2/CCR2/PDGFC/SYK/TRPV2/JAK2/CD36/G0S2/MAP2K6/FABP4/PLCL1/IL18R1/HSF1/PPARGC1A/ADRB2/IL15/RB1/ATF4	23
BP	GO:2000377	regulation of reactive oxygen species metabolic process	23/982	157/18723	7.64131e-06	7.24833e-05	5.0358e-05	TLR4/PLCG2/ABCD2/ACP5/PTK2B/GADD45A/SYK/CYP1B1/CD36/STK17A/GRB2/FYN/TYROBP/AKR1C1/FBLN5/SNCA/RAC2/PRCP/ITGB2/TNF/BST1/TLR6/FPR2	23
BP	GO:0010517	regulation of phospholipase activity	14/982	67/18723	7.86032e-06	7.43806e-05	5.16761e-05	ITK/CCL5/CD86/S1PR4/ANXA1/PLCB2/C5AR1/PHB/TXK/SNCA/PTAFR/LRP1/EDNRA/PLA2G5	14
BP	GO:0030041	actin filament polymerization	26/982	191/18723	7.86933e-06	7.43806e-05	5.16761e-05	WAS/HCLS1/NCKAP1L/CORO1A/GMFG/CCR7/PSTPIP1/EVL/CDC42EP1/RASA1/CDC42EP3/PTK2B/COTL1/GAS7/JAK2/CCL21/AIF1/HCK/GRB2/CYFIP2/IQGAP2/FER/FCHSD2/CCL11/GSN/CDC42EP4	26
BP	GO:0002532	production of molecular mediator involved in inflammatory response	17/982	95/18723	8.01602e-06	7.54083e-05	5.23902e-05	NCF1/CD6/TLR4/BTK/LILRB4/P2RX1/SLAMF8/ABCD2/SYK/SIRPA/CD36/GPSM3/MEFV/TNF/IL17RA/NOD2/TLR6	17
BP	GO:0045342	MHC class II biosynthetic process	7/982	16/18723	8.05276e-06	7.54083e-05	5.23902e-05	TLR4/IFNG/JAK2/IL10/CIITA/SPI1/TAF7	7
BP	GO:0045779	negative regulation of bone resorption	7/982	16/18723	8.05276e-06	7.54083e-05	5.23902e-05	INPP5D/TNFAIP3/GPR137B/P2RX7/CSK/CALCA/CLDN18	7
BP	GO:0050965	detection of temperature stimulus involved in sensory perception of pain	7/982	16/18723	8.05276e-06	7.54083e-05	5.23902e-05	CXCR4/ARRB2/LXN/CXCL12/ADORA1/ANO1/CALCA	7
BP	GO:0002507	tolerance induction	9/982	28/18723	8.09163e-06	7.54083e-05	5.23902e-05	CD3E/LILRB2/LILRB4/ICOS/TNFAIP3/HLA-E/FOXP3/IL2RA/IRAK3	9
BP	GO:0038094	Fc-gamma receptor signaling pathway	9/982	28/18723	8.09163e-06	7.54083e-05	5.23902e-05	PTPRC/FGR/FCGR2B/LIMK1/FCER1G/SYK/HCK/FYN/VAV1	9
BP	GO:0061082	myeloid leukocyte cytokine production	9/982	28/18723	8.09163e-06	7.54083e-05	5.23902e-05	LILRB1/TLR4/PLCG2/LAPTM5/BCL10/HMOX1/CD36/TGFB2/IRAK3	9
BP	GO:1902624	positive regulation of neutrophil migration	9/982	28/18723	8.09163e-06	7.54083e-05	5.23902e-05	NCKAP1L/CCR7/CCL19/CCL21/ADAM8/C5AR1/C3AR1/RAC2/CXCR2	9
BP	GO:0062207	regulation of pattern recognition receptor signaling pathway	18/982	105/18723	8.18052e-06	7.60679e-05	5.28484e-05	IRF4/TLR4/NR1H3/GFI1/ARRB2/TNFAIP3/IRF1/SLC15A3/SEC14L1/TLR1/LILRA4/CD36/CD300A/RNF125/NOD2/TLR6/PTPN22/IRAK3	18
BP	GO:0045861	negative regulation of proteolysis	39/982	351/18723	8.20159e-06	7.60679e-05	5.28484e-05	CD27/CARD8/NR1H3/CR1/MICAL1/ARRB2/CST6/LAMP3/APLP2/LXN/SERPING1/PLAT/ANXA2/TNFSF14/CST7/A2M/CAST/CSTA/IL10/ITIH5/SNCA/C3/NAIP/SERPINB9/CAMK2N1/USP25/TNF/APP/CTSZ/SERPINB1/RPS6KA3/MMP9/SDCBP/LRP1/RENBP/CHAC1/TFPI/NLE1/PML	39
BP	GO:0003158	endothelium development	21/982	136/18723	8.20536e-06	7.60679e-05	5.28484e-05	PPP1R16B/MET/PECAM1/S1PR1/CXCR4/ACVR1/BMP6/ITGAX/HEG1/ACVRL1/CXCL10/GJA5/NRP1/TIE1/FOXP3/CLDN1/TNF/CD34/JAG1/FASN/PDE4D	21
BP	GO:0032814	regulation of natural killer cell activation	10/982	35/18723	8.30953e-06	7.68994e-05	5.3426e-05	PRDM1/FGR/HLA-E/TYROBP/IL12B/RASGRP1/HLA-F/PTPN22/IL15RA/IL15	10
BP	GO:0034103	regulation of tissue remodeling	16/982	86/18723	8.78956e-06	8.12003e-05	5.64141e-05	S1PR1/INPP5D/GPNMB/TNFAIP3/SYK/PPP3CA/ADAM8/CSF1R/GPR137B/P2RX7/IL12B/CSK/IL15/PLEKHM1/CALCA/CLDN18	16
BP	GO:0032693	negative regulation of interleukin-10 production	8/982	22/18723	9.20623e-06	8.46104e-05	5.87833e-05	LILRB1/LILRB4/FCGR2B/JAK3/TYROBP/IL12B/PDCD1LG2/FOXP3	8
BP	GO:0045061	thymic T cell selection	8/982	22/18723	9.20623e-06	8.46104e-05	5.87833e-05	PTPRC/DOCK2/ZAP70/CD3E/CD3G/CD3D/CCR7/CD28	8
BP	GO:0009612	response to mechanical stimulus	28/982	216/18723	9.20648e-06	8.46104e-05	5.87833e-05	TLR4/CXCR4/TLR8/ITGA2/BCL10/TNC/BMP6/PTK2B/IRF1/TLR7/GADD45A/CXCL12/SLC1A3/TNFRSF8/TNFSF14/CXCL10/CASP1/PTGER4/FYN/STAT1/MAP3K14/PIEZO2/ETS1/SCN1A/DCN/ETV1/GSN/CASP5	28
BP	GO:1904035	regulation of epithelial cell apoptotic process	17/982	96/18723	9.27175e-06	8.50631e-05	5.90978e-05	FASLG/ARRB2/CD40LG/HMOX1/TNFAIP3/ZFP36L1/TEK/ITGA4/JAK2/CAST/FGA/TNF/PAK4/PPARGC1A/CCL2/GSN/ANGPT1	17
BP	GO:0046850	regulation of bone remodeling	12/982	51/18723	9.6312e-06	8.82085e-05	6.12831e-05	S1PR1/INPP5D/TNFAIP3/SYK/ADAM8/CSF1R/GPR137B/P2RX7/CSK/PLEKHM1/CALCA/CLDN18	12
BP	GO:0006911	phagocytosis, engulfment	20/982	127/18723	9.90441e-06	9.05547e-05	6.29131e-05	ARHGAP25/BIN2/NCKAP1L/RHOH/PLCG2/STAP1/ITGA2/FCGR2B/AIF1/CD36/CD300A/C3/RAC2/ABCA1/ITGB2/MSR1/RHOG/GSN/FCGR1A/SH3BP1	20
BP	GO:0097305	response to alcohol	31/982	253/18723	9.97636e-06	9.10558e-05	6.32612e-05	MAP4K1/CD27/CCR7/CYBB/CCL19/CCR5/TNC/HPGD/PTK2B/CD14/CCL21/SLIT3/TBXAS1/PTGER4/FYN/CDO1/VCAM1/ABCA1/FOXP3/KLF2/SPI1/CLDN1/BLM/BCL2L1/CAT/TGFBR3/FECH/CA3/CLDN18/S100A8/CRHBP	31
BP	GO:0051271	negative regulation of cellular component movement	40/982	367/18723	9.99862e-06	9.11024e-05	6.32936e-05	WAS/GPR18/CXCL13/STAP1/CARD10/EVL/APOE/SLAMF8/HMOX1/IL24/GADD45A/CXCL12/VASH1/IDH2/CD200/ACVRL1/CCL21/AIF1/CYP1B1/ADORA1/PTGER4/CD300A/DPP4/PTPRG/FBLN1/CX3CL1/MMP28/TIE1/TNF/CDKN1B/DCN/GNA12/MEOX2/IL27RA/JAG1/LRP1/PPARGC1A/CCL2/TGFBR3/ROBO1	40
BP	GO:0051048	negative regulation of secretion	24/982	171/18723	1.03092e-05	9.37714e-05	6.51479e-05	TNFRSF1B/NCKAP1L/LILRB1/NR1H3/APOE/CD84/CCR2/FCGR2B/HMOX1/FOXF1/IDH2/PPP3CA/CD200/FRMD4A/ADORA1/ANXA1/CD300A/SYT11/SNCA/IL12B/SPI1/HLA-F/IL13RA2/CRHBP	24
BP	GO:0002691	regulation of cellular extravasation	10/982	36/18723	1.09677e-05	9.9525e-05	6.91453e-05	CCR2/CXCL12/ITGA4/CCL21/PTGER4/ADAM8/PTAFR/BST1/IL27RA/FUT7	10
BP	GO:0006919	activation of cysteine-type endopeptidase activity involved in apoptotic process	15/982	78/18723	1.09792e-05	9.9525e-05	6.91453e-05	CARD8/LCK/P2RX1/LAPTM5/FASLG/JAK2/SNCA/TNF/NLRP1/MUL1/CASP10/HIP1/PML/ROBO1/S100A8	15
BP	GO:0001773	myeloid dendritic cell activation	9/982	29/18723	1.11889e-05	0.00010108	7.02259e-05	SLAMF1/DOCK2/IRF4/CD2/TSPAN32/CSF2/IL10/CAMK4/SPI1	9
BP	GO:0090025	regulation of monocyte chemotaxis	9/982	29/18723	1.11889e-05	0.00010108	7.02259e-05	CCL5/PLA2G7/SLAMF8/CCR2/CCR1/CXCL12/CXCL10/AIF1/FPR2	9
BP	GO:1901224	positive regulation of NIK/NF-kappaB signaling	14/982	69/18723	1.12605e-05	0.000101555	7.05558e-05	CD27/TLR4/LAPTM5/CCL19/CD86/TLR7/CD14/TNFSF14/PHB/IL12B/TNF/APP/NOD2/IL18R1	14
BP	GO:0043277	apoptotic cell clearance	12/982	52/18723	1.19282e-05	0.000107224	7.44941e-05	RHOH/NR1H3/CCR2/CD36/ANXA1/TYROBP/C3/FCN1/RAC2/RHOG/LRP1/CCL2	12
BP	GO:0007260	tyrosine phosphorylation of STAT protein	16/982	88/18723	1.19295e-05	0.000107224	7.44941e-05	CCL5/HCLS1/IFNG/FLT3/IL24/SH2B3/CSF2/JAK2/JAK3/CSF1R/FYN/IL12B/TNF/FER/HSF1/IL15	16
BP	GO:1902903	regulation of supramolecular fiber organization	41/982	383/18723	1.19995e-05	0.000107671	7.4805e-05	WAS/MET/HCLS1/NCKAP1L/GPR65/CORO1A/GMFG/PLEK/CCR7/S1PR1/EVL/APOE/CDC42EP1/RASA1/CDC42EP3/PTK2B/LIMK1/CXCL12/COTL1/CCL21/HCK/NRP1/PTGER4/GRB2/S100A10/SNCA/CX3CL1/CYFIP2/IQGAP2/FGF13/CDKN1B/APP/FER/CCDC88A/FLNA/FCHSD2/CCL11/GSN/CDC42EP4/RB1/SH3BP1	41
BP	GO:0032620	interleukin-17 production	11/982	44/18723	1.21333e-05	0.000108505	7.53845e-05	LY9/NCKAP1L/TLR4/PRKCQ/IFNG/PHB/IL12B/FOXP3/NOD2/IL27RA/IL15	11
BP	GO:0032660	regulation of interleukin-17 production	11/982	44/18723	1.21333e-05	0.000108505	7.53845e-05	LY9/NCKAP1L/TLR4/PRKCQ/IFNG/PHB/IL12B/FOXP3/NOD2/IL27RA/IL15	11
BP	GO:0043280	positive regulation of cysteine-type endopeptidase activity involved in apoptotic process	20/982	129/18723	1.25788e-05	0.000112195	7.79481e-05	CARD8/LCK/P2RX1/LAPTM5/FASLG/BCL10/SYK/JAK2/CASP1/SNCA/TNF/NLRP1/MUL1/HSF1/CASP10/HIP1/GSN/PML/ROBO1/S100A8	20
BP	GO:0010469	regulation of signaling receptor activity	24/982	173/18723	1.25882e-05	0.000112195	7.79481e-05	NCF1/LILRB4/EREG/CCR2/IFNG/IL18BP/FCGR2B/PTK2B/DKK2/JAK2/NRP1/ADORA1/IL10/PLAU/LY6E/IFNGR2/TNF/APP/PPARGC1A/ADRB2/CCL2/PDE4D/RGS9/CRHBP	24
BP	GO:0010934	macrophage cytokine production	7/982	17/18723	1.30698e-05	0.000116098	8.06597e-05	LILRB1/TLR4/PLCG2/LAPTM5/CD36/TGFB2/IRAK3	7
BP	GO:0010935	regulation of macrophage cytokine production	7/982	17/18723	1.30698e-05	0.000116098	8.06597e-05	LILRB1/TLR4/PLCG2/LAPTM5/CD36/TGFB2/IRAK3	7
BP	GO:0001666	response to hypoxia	35/982	307/18723	1.35642e-05	0.000120288	8.35707e-05	CXCR4/ITGA2/CYBB/CAPN2/LTA/HMOX1/PTK2B/ZFP36L1/CBFA2T3/TEK/CXCL12/PLAT/ACVRL1/CASP1/PTGIS/ADORA1/ADAM8/DPP4/PLAU/PAM/ETS1/VCAM1/KCNMA1/ITPR1/CDKN1B/TGFB2/RORA/CD34/CAT/HSF1/PPARGC1A/TGFBR3/EDNRA/PML/HSP90B1	35
BP	GO:0002369	T cell cytokine production	10/982	37/18723	1.43275e-05	0.000126182	8.7665e-05	SLAMF1/TNFRSF1B/SASH3/LILRB4/TBX21/CCR2/B2M/FOXP3/HLA-F/IL18R1	10
BP	GO:0002724	regulation of T cell cytokine production	10/982	37/18723	1.43275e-05	0.000126182	8.7665e-05	SLAMF1/TNFRSF1B/SASH3/LILRB4/TBX21/CCR2/B2M/FOXP3/HLA-F/IL18R1	10
BP	GO:0090218	positive regulation of lipid kinase activity	10/982	37/18723	1.43275e-05	0.000126182	8.7665e-05	CCR7/FGR/CCL19/PTK2B/FLT3/TEK/CCL21/NOD2/FPR2/AGAP2	10
BP	GO:0033004	negative regulation of mast cell activation	6/982	12/18723	1.44187e-05	0.000126182	8.7665e-05	CD84/HMOX1/FOXF1/CD300A/FER/IL13RA2	6
BP	GO:0043383	negative T cell selection	6/982	12/18723	1.44187e-05	0.000126182	8.7665e-05	PTPRC/DOCK2/ZAP70/CD3E/CCR7/CD28	6
BP	GO:0045916	negative regulation of complement activation	6/982	12/18723	1.44187e-05	0.000126182	8.7665e-05	CR1/SERPING1/A2M/CR2/CD59/VSIG4	6
BP	GO:1902563	regulation of neutrophil activation	6/982	12/18723	1.44187e-05	0.000126182	8.7665e-05	FCGR2B/SYK/CD300A/PTAFR/ITGB2/SPI1	6
BP	GO:2000508	regulation of dendritic cell chemotaxis	6/982	12/18723	1.44187e-05	0.000126182	8.7665e-05	SLAMF1/CCR7/SLAMF8/CCL21/SPI1/CCR6	6
BP	GO:0071901	negative regulation of protein serine/threonine kinase activity	19/982	120/18723	1.5155e-05	0.000132407	9.199e-05	LAX1/APOE/HHEX/SPRY2/PTPN6/TNFAIP3/HEG1/GADD45A/SH2B3/CD300A/KAT2B/PTPN1/DUSP7/CDKN1B/CEBPA/LRP5/PTPN22/IRAK3/RB1	19
BP	GO:1904646	cellular response to amyloid-beta	11/982	45/18723	1.53035e-05	0.000133485	9.27391e-05	TLR4/FCGR2B/ITGA4/CD36/FYN/VCAM1/APP/TLR6/FPR2/LRP1/ADRB2	11
BP	GO:0000302	response to reactive oxygen species	28/982	222/18723	1.54541e-05	0.000134577	9.34977e-05	NCF1/MET/IL18RAP/BTK/APOE/CAPN2/IL18BP/HMOX1/PTK2B/TNFAIP3/SIRPA/CYP1B1/CD36/ANXA1/FYN/STAT1/IL10/FBLN5/ETS1/KLF2/FER/MMP9/CAT/HSF1/PPARGC1A/PCGF2/SETX/SESN1	28
BP	GO:0002260	lymphocyte homeostasis	13/982	62/18723	1.58678e-05	0.000137728	9.5687e-05	NCKAP1L/CORO1A/SIT1/TNFRSF17/BCL10/TNFAIP3/DOCK10/TNFSF14/LAT/JAK3/FOXP3/TRAF3IP2/IL2RA	13
BP	GO:0032757	positive regulation of interleukin-8 production	13/982	62/18723	1.58678e-05	0.000137728	9.5687e-05	CD2/TLR4/TLR8/BCL10/CD244/TLR7/CD14/SYK/TLR1/CD58/FCN1/TNF/NOD2	13
BP	GO:0032722	positive regulation of chemokine production	14/982	71/18723	1.58999e-05	0.000137782	9.57242e-05	TLR4/CD84/IFNG/HMOX1/TLR7/IL33/SYK/AIF1/CSF1R/TNF/APP/IL17RA/NOD2/LRP1	14
BP	GO:0008064	regulation of actin polymerization or depolymerization	25/982	188/18723	1.75974e-05	0.000152243	0.000105772	WAS/HCLS1/NCKAP1L/CORO1A/GMFG/PLEK/CCR7/EVL/CDC42EP1/RASA1/CDC42EP3/PTK2B/CXCL12/COTL1/CCL21/HCK/GRB2/CYFIP2/IQGAP2/FER/FCHSD2/CCL11/GSN/CDC42EP4/SH3BP1	25
BP	GO:0071260	cellular response to mechanical stimulus	15/982	81/18723	1.76696e-05	0.000152619	0.000106033	TLR4/TLR8/ITGA2/BCL10/BMP6/IRF1/TLR7/GADD45A/TNFRSF8/TNFSF14/CASP1/PTGER4/MAP3K14/PIEZO2/CASP5	15
BP	GO:0070228	regulation of lymphocyte apoptotic process	12/982	54/18723	1.79942e-05	0.000155171	0.000107806	CCL5/CD27/CD3G/PRKCQ/BTK/IL7R/BCL10/IDO1/ADAM8/JAK3/IL10/LGALS3	12
BP	GO:0060191	regulation of lipase activity	16/982	91/18723	1.85174e-05	0.000159423	0.00011076	ITK/CCL5/NR1H3/CD86/APOC1/S1PR4/ANXA1/PLCB2/C5AR1/PHB/TXK/SNCA/PTAFR/LRP1/EDNRA/PLA2G5	16
BP	GO:0038095	Fc-epsilon receptor signaling pathway	8/982	24/18723	1.92766e-05	0.000165282	0.00011483	PRKCQ/PLCG2/BTK/FCER1G/SYK/LILRA4/VAV1/FER	8
BP	GO:0090023	positive regulation of neutrophil chemotaxis	8/982	24/18723	1.92766e-05	0.000165282	0.00011483	NCKAP1L/CCR7/CCL19/CCL21/C5AR1/C3AR1/RAC2/CXCR2	8
BP	GO:0030832	regulation of actin filament length	25/982	189/18723	1.92912e-05	0.000165282	0.00011483	WAS/HCLS1/NCKAP1L/CORO1A/GMFG/PLEK/CCR7/EVL/CDC42EP1/RASA1/CDC42EP3/PTK2B/CXCL12/COTL1/CCL21/HCK/GRB2/CYFIP2/IQGAP2/FER/FCHSD2/CCL11/GSN/CDC42EP4/SH3BP1	25
BP	GO:0040013	negative regulation of locomotion	41/982	391/18723	1.96062e-05	0.00016771	0.000116517	WAS/GPR18/CXCL13/STAP1/CARD10/EVL/APOE/SLAMF8/SEMA4D/HMOX1/SEMA3C/IL24/GADD45A/CXCL12/VASH1/IDH2/CD200/ACVRL1/CCL21/AIF1/CYP1B1/NRP1/ADORA1/PTGER4/CD300A/DPP4/PTPRG/FBLN1/CX3CL1/MMP28/TIE1/TNF/DCN/GNA12/MEOX2/IL27RA/JAG1/LRP1/PPARGC1A/CCL2/ROBO1	41
BP	GO:0010324	membrane invagination	21/982	144/18723	2.01339e-05	0.000171948	0.000119461	ARHGAP25/BIN2/NCKAP1L/RHOH/PLCG2/STAP1/ITGA2/FCGR2B/AIF1/CD36/CD300A/SYT11/C3/RAC2/ABCA1/ITGB2/MSR1/RHOG/GSN/FCGR1A/SH3BP1	21
BP	GO:0046851	negative regulation of bone remodeling	7/982	18/18723	2.04193e-05	0.000174105	0.00012096	INPP5D/TNFAIP3/GPR137B/P2RX7/CSK/CALCA/CLDN18	7
BP	GO:0031346	positive regulation of cell projection organization	38/982	353/18723	2.18736e-05	0.000186206	0.000129367	CCR7/APOE/ITGA2/SEMA4D/CCL19/CDC42EP1/ENPP2/CDC42EP3/PTK2B/LIMK1/CXCL12/PLXNC1/TRPV2/CCL21/NRP1/FYN/DDX56/P2RX7/ENC1/RAC2/CX3CL1/DNM3/RAB8B/CCDC88A/FLNA/ROR1/LRP1/NPTN/MAP3K13/DVL1/SCARB2/GPM6A/CDC42EP4/IQGAP1/ROBO1/PLEKHM1/SETX/FBXO38	38
BP	GO:0045620	negative regulation of lymphocyte differentiation	12/982	55/18723	2.19281e-05	0.000186371	0.000129482	FGL2/LILRB4/RUNX3/CR1/TBX21/LAG3/CTLA4/IRF1/ANXA1/JAK3/HLX/FOXP3	12
BP	GO:0032147	activation of protein kinase activity	20/982	134/18723	2.23191e-05	0.000189392	0.00013158	CCL5/NCKAP1L/CARD10/CD86/PTK2B/PDGFC/JAK2/CD300A/PHB/IL12B/CAB39/TRAF4/FGF13/TGFB2/CCDC88A/TLR6/ADRB2/CALCA/ANGPT1/AGAP2	20
BP	GO:0051056	regulation of small GTPase mediated signal transduction	34/982	302/18723	2.33209e-05	0.000197577	0.000137267	ARHGAP25/MET/DOCK2/GPR18/GPR65/CYTH4/P2RY10/PIK3CG/APOE/RASA1/SPRY2/FGD2/HEG1/LPAR6/NRP1/DENND3/ARHGAP10/CYTH3/VAV1/RASGRP1/ABCA1/STARD8/TGFB2/ARHGEF11/MYO9B/DEF6/GMIP/RASA3/ROBO1/STMN3/CHN1/DENND4A/ABR/SH3BP1	34
BP	GO:0045581	negative regulation of T cell differentiation	11/982	47/18723	2.38484e-05	0.000201724	0.000140148	FGL2/LILRB4/RUNX3/TBX21/LAG3/CTLA4/IRF1/ANXA1/JAK3/HLX/FOXP3	11
BP	GO:0032088	negative regulation of NF-kappaB transcription factor activity	16/982	93/18723	2.45378e-05	0.000207226	0.000143971	CARD8/CMKLR1/GFI1/ARRB2/CYLD/TNFAIP3/CD200/CYP1B1/PTGIS/IL10/TRAF3/FOXP3/SPI1/NOD2/CAT/IRAK3	16
BP	GO:0002638	negative regulation of immunoglobulin production	6/982	13/18723	2.55876e-05	0.000214726	0.000149181	CD22/CR1/FCGR2B/PARP3/FOXP3/IL13RA2	6
BP	GO:0060100	positive regulation of phagocytosis, engulfment	6/982	13/18723	2.55876e-05	0.000214726	0.000149181	NCKAP1L/PLCG2/STAP1/ITGA2/CD36/C3	6
BP	GO:0070486	leukocyte aggregation	6/982	13/18723	2.55876e-05	0.000214726	0.000149181	ZAP70/SEMA4D/STK10/JAM2/RAC2/S100A8	6
BP	GO:1905155	positive regulation of membrane invagination	6/982	13/18723	2.55876e-05	0.000214726	0.000149181	NCKAP1L/PLCG2/STAP1/ITGA2/CD36/C3	6
BP	GO:0048008	platelet-derived growth factor receptor signaling pathway	12/982	56/18723	2.65899e-05	0.000222434	0.000154536	PDGFC/PLAT/JAK2/NRP1/PTPN12/SNCA/ARID5B/PTPN1/FER/TIPARP/LRP1/HIP1	12
BP	GO:1904645	response to amyloid-beta	12/982	56/18723	2.65899e-05	0.000222434	0.000154536	TLR4/FCGR2B/ITGA4/CD36/FYN/VCAM1/APP/MMP9/TLR6/FPR2/LRP1/ADRB2	12
BP	GO:0031664	regulation of lipopolysaccharide-mediated signaling pathway	8/982	25/18723	2.7049e-05	0.000225238	0.000156484	CARD8/CD180/BMP6/TNFAIP3/CD36/LY86/CX3CL1/LY96	8
BP	GO:1901623	regulation of lymphocyte chemotaxis	8/982	25/18723	2.7049e-05	0.000225238	0.000156484	CCL5/CXCL13/CCL4/CCR2/PTK2B/CXCL10/CCL21/CCL2	8
BP	GO:0032535	regulation of cellular component size	40/982	383/18723	2.70523e-05	0.000225238	0.000156484	WAS/HCLS1/NCKAP1L/CORO1A/GMFG/PLEK/CCR7/EVL/KCNN4/APOE/IL7R/SEMA4D/CDC42EP1/RASA1/CDC42EP3/PTK2B/SEMA3C/LIMK1/CXCL12/COTL1/TRPV2/CCL21/HCK/NRP1/GRB2/P2RX7/CYFIP2/VAV1/IQGAP2/FGF13/KCNMA1/FER/AQP4/FCHSD2/LRP1/CCL11/MAP3K13/GSN/CDC42EP4/SH3BP1	40
BP	GO:0043542	endothelial cell migration	32/982	279/18723	2.78001e-05	0.000230877	0.000160402	MET/LPXN/CXCL13/CARD10/PIK3CG/APOE/STAT5A/EPHA2/HMOX1/PTK2B/EFNB2/PIK3CD/GADD45A/TEK/VASH1/ACVRL1/CYP1B1/NRP1/ANXA3/ANXA1/DPP4/PRCP/ETS1/MAP3K3/TNF/DCN/S100P/MEOX2/GLUL/ROBO1/ANGPT1/SH3BP1	32
BP	GO:0099024	plasma membrane invagination	20/982	136/18723	2.78165e-05	0.000230877	0.000160402	ARHGAP25/BIN2/NCKAP1L/RHOH/PLCG2/STAP1/ITGA2/FCGR2B/AIF1/CD36/CD300A/C3/RAC2/ABCA1/ITGB2/MSR1/RHOG/GSN/FCGR1A/SH3BP1	20
BP	GO:0019216	regulation of lipid metabolic process	36/982	331/18723	2.86756e-05	0.000237636	0.000165098	CCR7/PLCG2/RAB38/NR1H3/GFI1/PIK3CG/APOE/BCL11B/FGR/ABCD2/CCL19/CAPN2/IFNG/BMP6/PTK2B/FLT3/APOC1/TEK/PSAP/CCL21/ADORA1/ANXA1/SNCA/C3/RARRES2/TNF/INSIG2/RORA/PIK3IP1/NOD2/ABCG1/FPR2/PPARGC1A/CLCN2/CREBL2/AGAP2	36
BP	GO:0010543	regulation of platelet activation	10/982	40/18723	3.02074e-05	0.000249941	0.000173647	TLR4/PRKCQ/PLEK/APOE/FCER1G/SH2B3/SYK/JAK2/TXK/C1QTNF1	10
BP	GO:0034121	regulation of toll-like receptor signaling pathway	14/982	75/18723	3.04602e-05	0.00025164	0.000174828	IRF4/NR1H3/GFI1/ARRB2/TNFAIP3/IRF1/TLR1/LILRA4/CD36/CD300A/NOD2/TLR6/PTPN22/IRAK3	14
BP	GO:0002523	leukocyte migration involved in inflammatory response	7/982	19/18723	3.08689e-05	0.00025344	0.000176078	SLAMF1/SLAMF8/ADAM8/CX3CL1/CCR6/FUT7/S100A8	7
BP	GO:0002716	negative regulation of natural killer cell mediated immunity	7/982	19/18723	3.08689e-05	0.00025344	0.000176078	LILRB1/KLRD1/CD96/ARRB2/HLA-E/SERPINB9/HLA-F	7
BP	GO:0010759	positive regulation of macrophage chemotaxis	7/982	19/18723	3.08689e-05	0.00025344	0.000176078	SLAMF1/CCL5/CMKLR1/C5AR1/CSF1R/C3AR1/RARRES2	7
BP	GO:0050961	detection of temperature stimulus involved in sensory perception	7/982	19/18723	3.08689e-05	0.00025344	0.000176078	CXCR4/ARRB2/LXN/CXCL12/ADORA1/ANO1/CALCA	7
BP	GO:0007266	Rho protein signal transduction	20/982	137/18723	3.09953e-05	0.000254085	0.000176526	WAS/MET/GPR18/GPR65/P2RY10/APOE/CDC42EP1/CDC42EP3/HEG1/LIMK1/LPAR6/NRP1/ABCA1/STARD8/ARHGEF11/MYO9B/GNA12/RHOG/CDC42EP4/ROBO1	20
BP	GO:0045862	positive regulation of proteolysis	39/982	372/18723	3.1182e-05	0.000255221	0.000177316	TNFRSF1B/CARD8/PYHIN1/LCK/P2RX1/LAPTM5/APOE/CR1/FASLG/BCL10/IFNG/PTK2B/CBFA2T3/SYK/JAK2/CASP1/ADAM8/FYN/FBLN1/SNCA/CYFIP2/MEFV/TNF/APP/NLRP1/MUL1/AGTPBP1/CEBPA/EFNA3/HSF1/CASP10/CSNK1A1/HIP1/DVL1/GSN/PML/ROBO1/S100A8/PIAS1	39
BP	GO:2000146	negative regulation of cell motility	38/982	359/18723	3.17908e-05	0.000259804	0.000180499	WAS/GPR18/CXCL13/STAP1/CARD10/EVL/APOE/SLAMF8/HMOX1/IL24/GADD45A/CXCL12/VASH1/IDH2/CD200/ACVRL1/CCL21/AIF1/CYP1B1/ADORA1/PTGER4/CD300A/DPP4/PTPRG/FBLN1/CX3CL1/MMP28/TIE1/TNF/DCN/GNA12/MEOX2/IL27RA/JAG1/LRP1/PPARGC1A/CCL2/ROBO1	38
BP	GO:0097191	extrinsic apoptotic signaling pathway	27/982	219/18723	3.27781e-05	0.000267461	0.000185819	PTPRC/TNFRSF1B/CD27/ACVR1/FASLG/BCL10/IFNG/STK4/HMOX1/CYLD/TNFAIP3/CSF2/JAK2/NRP1/FYN/P2RX7/LGALS3/G0S2/CX3CL1/BCL2A1/FGA/SPI1/TNF/TGFB2/BCL2L1/SIVA1/PML	27
BP	GO:0070302	regulation of stress-activated protein kinase signaling cascade	25/982	195/18723	3.29378e-05	0.000268352	0.000186438	NCF1/SLAMF1/CD27/TLR4/CCR7/RASSF2/CCL19/FCGR2B/PTK2B/CYLD/GADD45A/SIRPA/CCL21/RNF13/TRAF3/TRAF4/RASGRP1/MAP3K3/SPI1/TNF/APP/TGFB2/NOD2/SDCBP/PTPN22	25
BP	GO:0032273	positive regulation of protein polymerization	20/982	138/18723	3.44949e-05	0.000280608	0.000194953	WAS/MET/NCKAP1L/CORO1A/GMFG/CCR7/EVL/CDC42EP1/CDC42EP3/PTK2B/CCL21/HCK/GRB2/IQGAP2/CDKN1B/FER/FCHSD2/CCL11/GSN/CDC42EP4	20
BP	GO:0032692	negative regulation of interleukin-1 production	11/982	49/18723	3.62349e-05	0.000293862	0.000204161	CARD8/LILRB4/ARRB2/ACP5/TNFAIP3/IL10/CX3CL1/MEFV/SERPINB1/CD33/PML	11
BP	GO:1904894	positive regulation of receptor signaling pathway via STAT	11/982	49/18723	3.62349e-05	0.000293862	0.000204161	IL10RA/CCL5/IL7R/PTK2B/JAK2/CYP1B1/CRLF3/CD300A/IL10/IL12B/TNF	11
BP	GO:2000117	negative regulation of cysteine-type endopeptidase activity	15/982	86/18723	3.69927e-05	0.000299551	0.000208114	CD27/CARD8/MICAL1/ARRB2/LAMP3/TNFSF14/CST7/CAST/SNCA/NAIP/SERPINB9/TNF/RPS6KA3/MMP9/NLE1	15
BP	GO:1905523	positive regulation of macrophage migration	8/982	26/18723	3.72817e-05	0.000301261	0.000209302	SLAMF1/CCL5/CMKLR1/C5AR1/CSF1R/C3AR1/CX3CL1/RARRES2	8
BP	GO:0036293	response to decreased oxygen levels	35/982	322/18723	3.73174e-05	0.000301261	0.000209302	CXCR4/ITGA2/CYBB/CAPN2/LTA/HMOX1/PTK2B/ZFP36L1/CBFA2T3/TEK/CXCL12/PLAT/ACVRL1/CASP1/PTGIS/ADORA1/ADAM8/DPP4/PLAU/PAM/ETS1/VCAM1/KCNMA1/ITPR1/CDKN1B/TGFB2/RORA/CD34/CAT/HSF1/PPARGC1A/TGFBR3/EDNRA/PML/HSP90B1	35
BP	GO:0001954	positive regulation of cell-matrix adhesion	12/982	58/18723	3.85506e-05	0.000310745	0.000215891	CD3E/CCR7/PTK2B/TEK/CCL21/NRP1/CD36/S100A10/SKAP1/CX3CL1/PLEKHA2/IQGAP1	12
BP	GO:0051896	regulation of protein kinase B signaling	24/982	185/18723	3.87407e-05	0.000311804	0.000216627	MET/HCLS1/CCR7/PIK3CG/CCL19/ARRB2/BANK1/EPHA2/SPRY2/PIK3R5/PIK3CD/CD28/TEK/SH2B3/CCL21/ADAM8/PHB/CX3CL1/TNF/MUL1/HIP1/C1QTNF1/THPO/ANGPT1	24
BP	GO:0071248	cellular response to metal ion	25/982	197/18723	3.91302e-05	0.000314463	0.000218474	NCF1/PLCG2/RASGRP2/CYBB/BMP6/HMOX1/B2M/SYT11/SNCA/MT1F/ANK3/MT1E/CLDN1/CDKN1B/APP/FABP4/CEBPA/MCOLN1/MMP9/HSF1/PPARGC1A/DLG2/IQGAP1/CRHBP/MT2A	25
BP	GO:0002517	T cell tolerance induction	6/982	14/18723	4.27903e-05	0.00034164	0.000237355	CD3E/LILRB2/LILRB4/ICOS/FOXP3/IL2RA	6
BP	GO:0043374	CD8-positive, alpha-beta T cell differentiation	6/982	14/18723	4.27903e-05	0.00034164	0.000237355	GPR18/NCKAP1L/LILRB4/RUNX3/TNFSF8/IRF1	6
BP	GO:0045059	positive thymic T cell selection	6/982	14/18723	4.27903e-05	0.00034164	0.000237355	PTPRC/DOCK2/ZAP70/CD3E/CD3G/CD3D	6
BP	GO:0045579	positive regulation of B cell differentiation	6/982	14/18723	4.27903e-05	0.00034164	0.000237355	NCKAP1L/CD27/BTK/INPP5D/SYK/IL10	6
BP	GO:0034101	erythrocyte homeostasis	19/982	129/18723	4.28337e-05	0.00034164	0.000237355	IKZF1/HCLS1/NCKAP1L/INPP5D/MAFB/HMOX1/ZFP36L1/B2M/SH2B3/JAK2/JAK3/STAT1/ETS1/BPGM/KLF2/SPI1/HOXA5/TGFBR3/RB1	19
BP	GO:0070231	T cell apoptotic process	11/982	50/18723	4.42745e-05	0.000352075	0.000244605	CCL5/CD27/PRKCQ/IL7R/FASLG/BCL10/IDO1/ADAM8/JAK3/LGALS3/IL2RA	11
BP	GO:1902930	regulation of alcohol biosynthetic process	11/982	50/18723	4.42745e-05	0.000352075	0.000244605	PLEK/GFI1/APOE/BMP6/PTK2B/CD244/HRH1/SNCA/PTAFR/ABCG1/CLCN2	11
BP	GO:0042531	positive regulation of tyrosine phosphorylation of STAT protein	13/982	68/18723	4.47507e-05	0.00035533	0.000246866	CCL5/HCLS1/IFNG/FLT3/IL24/CSF2/JAK2/CSF1R/FYN/IL12B/TNF/HSF1/IL15	13
BP	GO:0032495	response to muramyl dipeptide	7/982	20/18723	4.53453e-05	0.000358444	0.00024903	TNFAIP3/NLRP1/IRF5/NOD2/LDOC1/JAG1/PTPN22	7
BP	GO:0034104	negative regulation of tissue remodeling	7/982	20/18723	4.53453e-05	0.000358444	0.00024903	INPP5D/TNFAIP3/GPR137B/P2RX7/CSK/CALCA/CLDN18	7
BP	GO:0140632	inflammasome complex assembly	7/982	20/18723	4.53453e-05	0.000358444	0.00024903	CARD8/TLR4/PLCG2/CD36/MEFV/NLRP1/TLR6	7
BP	GO:0043551	regulation of phosphatidylinositol 3-kinase activity	12/982	59/18723	4.61093e-05	0.000363942	0.000252849	CCR7/FGR/CCL19/PIK3R5/PTK2B/FLT3/TEK/CCL21/PIK3IP1/NOD2/FPR2/AGAP2	12
BP	GO:0051346	negative regulation of hydrolase activity	39/982	379/18723	4.71615e-05	0.000371694	0.000258235	NCKAP1L/CD27/CARD8/GZMA/CR1/SEMA4D/MICAL1/ARRB2/CST6/SPRY2/LAMP3/APOC1/APLP2/LXN/SERPING1/ANXA2/TNFSF14/CST7/ANXA1/A2M/CAST/CSTA/ITIH5/SNCA/C3/LGALS3/NAIP/SERPINB9/TNF/APP/TGFB2/SERPINB1/GMIP/RPS6KA3/MMP9/LRP1/RENBP/TFPI/NLE1	39
BP	GO:0032691	negative regulation of interleukin-1 beta production	10/982	42/18723	4.76606e-05	0.000375072	0.000260582	CARD8/LILRB4/ARRB2/ACP5/TNFAIP3/CX3CL1/MEFV/SERPINB1/CD33/PML	10
BP	GO:0010466	negative regulation of peptidase activity	30/982	262/18723	5.05095e-05	0.000394923	0.000274374	CD27/CARD8/CR1/MICAL1/ARRB2/CST6/LAMP3/APLP2/LXN/SERPING1/ANXA2/TNFSF14/CST7/A2M/CAST/CSTA/ITIH5/SNCA/C3/NAIP/SERPINB9/TNF/APP/SERPINB1/RPS6KA3/MMP9/LRP1/RENBP/TFPI/NLE1	30
BP	GO:0002433	immune response-regulating cell surface receptor signaling pathway involved in phagocytosis	8/982	27/18723	5.05549e-05	0.000394923	0.000274374	PTPRC/FGR/FCGR2B/LIMK1/SYK/HCK/FYN/VAV1	8
BP	GO:0038096	Fc-gamma receptor signaling pathway involved in phagocytosis	8/982	27/18723	5.05549e-05	0.000394923	0.000274374	PTPRC/FGR/FCGR2B/LIMK1/SYK/HCK/FYN/VAV1	8
BP	GO:0060333	interferon-gamma-mediated signaling pathway	8/982	27/18723	5.05549e-05	0.000394923	0.000274374	NR1H3/IFNG/IRF1/JAK2/HCK/STAT1/TXK/IFNGR2	8
BP	GO:0071624	positive regulation of granulocyte chemotaxis	8/982	27/18723	5.05549e-05	0.000394923	0.000274374	NCKAP1L/CCR7/CCL19/CCL21/C5AR1/C3AR1/RAC2/CXCR2	8
BP	GO:0043270	positive regulation of ion transport	31/982	275/18723	5.1396e-05	0.000400904	0.000278529	CCL5/PLCG2/P2RX1/CTSS/KCNN4/CCL4/CXCL9/CCR2/CCR1/KMO/ARRB2/IFNG/CXCL12/TRPV2/CXCL10/STAC/ADORA1/P2RX7/SNCA/LGALS3/CX3CL1/PTAFR/IFNGR2/MAP2K6/FXYD1/ANK3/CXCL11/FLNA/ADRB2/CCL2/RGS9	31
BP	GO:0034765	regulation of ion transmembrane transport	47/982	491/18723	5.16212e-05	0.00040207	0.00027934	CORO1A/PDE4B/PLCG2/P2RX1/CTSS/PIK3CG/KCNN4/CYBB/CXCL9/CCR2/IFNG/PTPN6/PTK2B/KCNAB2/CLIC5/KCNK5/SLC31A2/CXCL10/GJA5/STAC/KCNJ5/FYN/P2RX7/SNCA/CX3CL1/PTAFR/IFNGR2/CAB39/FXYD1/FGF13/KCNMA1/ANK3/CXCL11/SCN1A/APP/KCNE4/FLNA/KCNA3/MMP9/PPARGC1A/ADRB2/CLCN2/CCL2/PDE4D/RGS9/NEDD4/CRHBP	47
BP	GO:0030218	erythrocyte differentiation	18/982	120/18723	5.28612e-05	0.000411098	0.000285611	IKZF1/HCLS1/NCKAP1L/INPP5D/MAFB/ZFP36L1/B2M/SH2B3/JAK2/JAK3/STAT1/ETS1/BPGM/KLF2/SPI1/HOXA5/TGFBR3/RB1	18
BP	GO:0050678	regulation of epithelial cell proliferation	39/982	381/18723	5.2935e-05	0.000411098	0.000285611	PPP1R16B/RUNX3/APOE/BCL11B/STAT5A/EREG/BMP6/HMOX1/PIK3CD/TNFAIP3/ZFP36L1/TEK/CXCL12/B2M/VASH1/ITGA4/ACVRL1/NRP1/EDNRB/C5AR1/STAT1/IL10/CDH3/IL12B/WNT2/TIE1/CLDN1/TNF/CDKN1B/CAV2/TGFB2/NOD2/CCL11/CCL2/HOXA5/TGFBR3/GLUL/ROBO1/RB1	39
BP	GO:0046578	regulation of Ras protein signal transduction	24/982	189/18723	5.48889e-05	0.000425249	0.000295443	MET/GPR18/GPR65/CYTH4/P2RY10/PIK3CG/APOE/RASA1/SPRY2/HEG1/LPAR6/NRP1/DENND3/CYTH3/RASGRP1/ABCA1/STARD8/TGFB2/MYO9B/RASA3/ROBO1/STMN3/DENND4A/SH3BP1	24
BP	GO:0009620	response to fungus	12/982	60/18723	5.49173e-05	0.000425249	0.000295443	TLR4/PLCG2/BTK/BCL10/CLEC4E/SYK/GNLY/COTL1/SPI1/RARRES2/PLA2G5/S100A8	12
BP	GO:0050673	epithelial cell proliferation	43/982	437/18723	5.66641e-05	0.000438136	0.000304396	PPP1R16B/RUNX3/APOE/BCL11B/STAT5A/EREG/BMP6/EPHA2/HMOX1/PIK3CD/TNFAIP3/ZFP36L1/TEK/CXCL12/B2M/VASH1/ITGA4/ACVRL1/NRP1/EDNRB/C5AR1/STAT1/IL10/CDH3/IL12B/WNT2/TIE1/CLDN1/TNF/CDKN1B/CAV2/TGFB2/SERPINB1/CD34/NOD2/CCL11/CCL2/HOXA5/TGFBR3/GLUL/ROBO1/RB1/COL8A1	43
BP	GO:0014002	astrocyte development	10/982	43/18723	5.92095e-05	0.000457153	0.000317608	TLR4/IFNG/C1QA/C5AR1/TNF/APP/FPR2/ROR1/LRP1/S100A8	10
BP	GO:0010951	negative regulation of endopeptidase activity	29/982	252/18723	6.11691e-05	0.000471597	0.000327643	CD27/CARD8/CR1/MICAL1/ARRB2/CST6/LAMP3/APLP2/LXN/SERPING1/ANXA2/TNFSF14/CST7/A2M/CAST/CSTA/ITIH5/SNCA/C3/NAIP/SERPINB9/TNF/APP/SERPINB1/RPS6KA3/MMP9/RENBP/TFPI/NLE1	29
BP	GO:0030336	negative regulation of cell migration	36/982	344/18723	6.44513e-05	0.000496181	0.000344723	GPR18/CXCL13/STAP1/CARD10/EVL/APOE/SLAMF8/HMOX1/IL24/GADD45A/CXCL12/VASH1/IDH2/CD200/ACVRL1/CCL21/AIF1/CYP1B1/ADORA1/PTGER4/CD300A/DPP4/PTPRG/CX3CL1/MMP28/TIE1/TNF/DCN/GNA12/MEOX2/IL27RA/JAG1/LRP1/PPARGC1A/CCL2/ROBO1	36
BP	GO:0043373	CD4-positive, alpha-beta T cell lineage commitment	7/982	21/18723	6.49477e-05	0.000499233	0.000346843	LY9/IRF4/TBX21/IL12RB1/IL12B/FOXP3/SPN	7
BP	GO:0002218	activation of innate immune response	11/982	52/18723	6.50356e-05	0.000499233	0.000346843	TLR4/PYHIN1/PLCG2/KLRD1/ZBP1/SYK/HCK/FYN/TYROBP/FCN1/MNDA	11
BP	GO:0002474	antigen processing and presentation of peptide antigen via MHC class I	8/982	28/18723	6.75403e-05	0.000516221	0.000358646	HLA-E/FCER1G/B2M/TAP1/HLA-F/TAP2/ACE/TAPBPL	8
BP	GO:0002675	positive regulation of acute inflammatory response	8/982	28/18723	6.75403e-05	0.000516221	0.000358646	CCR7/BTK/PIK3CG/HLA-E/OSMR/ADAM8/C3/TNF	8
BP	GO:0045671	negative regulation of osteoclast differentiation	8/982	28/18723	6.75403e-05	0.000516221	0.000358646	LILRB1/TLR4/LILRB4/LILRB3/INPP5D/MAFB/GPR137B/CLDN18	8
BP	GO:0050830	defense response to Gram-positive bacterium	16/982	101/18723	6.95644e-05	0.000530928	0.000368864	IL7R/FGR/LTA/ACP5/EPHA2/TNFSF8/HLA-E/TNFRSF14/RNASE6/LYZ/CD36/C5AR1/RARRES2/TNF/NOD2/IL27RA	16
BP	GO:0043409	negative regulation of MAPK cascade	23/982	180/18723	7.06636e-05	0.000537695	0.000373565	PTPRC/LAX1/TLR4/LILRB4/APOE/DUSP6/SPRY2/PTPN6/CYLD/SH2B3/SIRPA/GBP1/CD300A/PHB/FBLN1/P2RX7/CAMK2N1/PTPN1/DUSP7/DUSP2/CSK/PTPN22/IRAK3	23
BP	GO:0032872	regulation of stress-activated MAPK cascade	24/982	192/18723	7.07125e-05	0.000537695	0.000373565	NCF1/SLAMF1/CD27/TLR4/CCR7/RASSF2/CCL19/FCGR2B/PTK2B/CYLD/GADD45A/SIRPA/CCL21/TRAF3/TRAF4/RASGRP1/MAP3K3/SPI1/TNF/APP/TGFB2/NOD2/SDCBP/PTPN22	24
BP	GO:0009306	protein secretion	37/982	359/18723	7.07546e-05	0.000537695	0.000373565	CCL5/TLR4/PLEK/NR1H3/KCNN4/APOE/IFNG/BMP6/STEAP3/IDH2/PPP3CA/JAK2/CD200/FRMD4A/SEL1L/ANXA1/ADAM8/DPP4/PAM/IL12B/CAMK2N1/ABCA1/RAB8B/FGA/ANO1/TNF/TGFB2/WLS/CD33/ABCG1/LRP5/PREB/LRP1/CYB5R4/GLUL/NECAB3/SOX4	37
BP	GO:0071695	anatomical structure maturation	27/982	229/18723	7.16011e-05	0.000542995	0.000377247	BTK/S1PR1/SEMA4D/CCL19/EREG/C1QA/PTK2B/ACVRL1/CCL21/SNX10/EDNRB/C3/LYL1/CDH3/CX3CL1/KLF2/APP/TGFB2/PDE3A/CCR6/CEBPA/CABYR/MAP3K13/LHX6/IL15/HOXA5/RB1	27
BP	GO:0043550	regulation of lipid kinase activity	13/982	71/18723	7.16565e-05	0.000542995	0.000377247	CCR7/FGR/CCL19/PIK3R5/PTK2B/FLT3/TEK/CCL21/PIK3IP1/NOD2/FPR2/RB1/AGAP2	13
BP	GO:0043434	response to peptide hormone	41/982	414/18723	7.25468e-05	0.000548958	0.00038139	PRKCB/PRKCQ/STAT5A/CYBB/EREG/HHEX/ZFP36L1/TEK/CXCL12/BCAR3/STAT4/JAK2/ANXA1/EDNRB/GRB2/JAK3/FYN/STAT1/IL10/MYO5A/CDO1/KAT2B/PTPN1/RAB8B/RARRES2/EGR2/CDKN1B/INSIG2/CAV2/FER/CSK/LRP5/CAT/HSF1/CYSLTR2/CPS1/TBC1D4/TGFBR3/IQGAP1/FUT7/CRHBP	41
BP	GO:0046006	regulation of activated T cell proliferation	10/982	44/18723	7.30555e-05	0.000551237	0.000382973	SLAMF1/LILRB4/CRTAM/IL12RB1/BTN2A2/IL12B/PDCD1LG2/FOXP3/IL2RA/IL27RA	10
BP	GO:0046427	positive regulation of receptor signaling pathway via JAK-STAT	10/982	44/18723	7.30555e-05	0.000551237	0.000382973	IL10RA/CCL5/PTK2B/JAK2/CYP1B1/CRLF3/CD300A/IL10/IL12B/TNF	10
BP	GO:0051051	negative regulation of transport	45/982	470/18723	7.36905e-05	0.00055524	0.000385754	PRKCB/TNFRSF1B/NCKAP1L/LILRB1/TRAT1/CORO1A/LILRB2/NR1H3/APOE/CD84/CCR2/FCGR2B/HMOX1/PTK2B/UBE2J1/APOC1/FOXF1/IDH2/PPP3CA/SIRPA/CD200/FRMD4A/CD36/ADORA1/ANXA1/CD300A/SYT11/SNCA/LGALS3/IL12B/CAB39/ANK3/SPI1/TNF/HLA-F/KCNE4/CSK/CD33/MMP9/IL13RA2/SDCBP/TBC1D4/NEDD4/ANGPT1/CRHBP	45
BP	GO:0051017	actin filament bundle assembly	21/982	157/18723	7.40591e-05	0.000557227	0.000387135	WAS/MET/GPR65/PLEK/S1PR1/EVL/LCP1/MICAL1/PTK2B/LIMK1/PLS3/AIF1/NRP1/PTGER4/ITGB5/S100A10/CX3CL1/PHACTR1/CCDC88A/FLNA/HSP90B1	21
BP	GO:0035592	establishment of protein localization to extracellular region	37/982	360/18723	7.49883e-05	0.00056342	0.000391438	CCL5/TLR4/PLEK/NR1H3/KCNN4/APOE/IFNG/BMP6/STEAP3/IDH2/PPP3CA/JAK2/CD200/FRMD4A/SEL1L/ANXA1/ADAM8/DPP4/PAM/IL12B/CAMK2N1/ABCA1/RAB8B/FGA/ANO1/TNF/TGFB2/WLS/CD33/ABCG1/LRP5/PREB/LRP1/CYB5R4/GLUL/NECAB3/SOX4	37
BP	GO:0042092	type 2 immune response	9/982	36/18723	7.54951e-05	0.000565627	0.000392971	TBX21/CD86/CCR2/ANXA1/IL10/HLX/TRAF3IP2/NOD2/IL27RA	9
BP	GO:0071402	cellular response to lipoprotein particle stimulus	9/982	36/18723	7.54951e-05	0.000565627	0.000392971	TLR4/APOE/FCER1G/SYK/CD36/ABCA1/ITGB2/ABCG1/TLR6	9
BP	GO:0060348	bone development	25/982	205/18723	7.57536e-05	0.000566765	0.000393762	PTPRC/FLI1/LILRB1/SEMA4D/BMP6/ACP5/PTPN6/PDGFC/ANXA6/TEK/PLS3/SH2B3/ANXA2/SNX10/PTGER4/TYROBP/MAP2K6/TRIM45/INSIG2/LRP5/MEIS1/ALPL/THPO/CLDN18/LRRK1	25
BP	GO:0045766	positive regulation of angiogenesis	23/982	181/18723	7.70201e-05	0.000574102	0.000398859	PRKCB/CXCR4/CYBB/HMOX1/ITGAX/PTK2B/PIK3CD/TEK/ACVRL1/CYP1B1/PTGIS/NRP1/ANXA3/C5AR1/IL10/C3/C3AR1/ETS1/TIE1/CD34/PAK4/CXCR2/CCL11	23
BP	GO:1904018	positive regulation of vasculature development	23/982	181/18723	7.70201e-05	0.000574102	0.000398859	PRKCB/CXCR4/CYBB/HMOX1/ITGAX/PTK2B/PIK3CD/TEK/ACVRL1/CYP1B1/PTGIS/NRP1/ANXA3/C5AR1/IL10/C3/C3AR1/ETS1/TIE1/CD34/PAK4/CXCR2/CCL11	23
BP	GO:0070482	response to oxygen levels	36/982	347/18723	7.70585e-05	0.000574102	0.000398859	CXCR4/ITGA2/CYBB/CAPN2/LTA/HMOX1/PTK2B/ZFP36L1/CBFA2T3/TEK/CXCL12/PLAT/ACVRL1/CASP1/PTGIS/ADORA1/ADAM8/DPP4/PLAU/PAM/ETS1/VCAM1/KCNMA1/ITPR1/CDKN1B/TGFB2/RORA/CD34/CAT/HSF1/PPARGC1A/CYB5R4/TGFBR3/EDNRA/PML/HSP90B1	36
BP	GO:0050819	negative regulation of coagulation	11/982	53/18723	7.82213e-05	0.000581949	0.000404311	APOE/SERPING1/PLAT/SH2B3/ANXA2/PLAU/FGA/CD34/PROCR/C1QTNF1/TFPI	11
BP	GO:0035747	natural killer cell chemotaxis	5/982	10/18723	7.93535e-05	0.000587902	0.000408447	CCL5/PIK3CG/CCL4/PIK3CD/CCL2	5
BP	GO:0045348	positive regulation of MHC class II biosynthetic process	5/982	10/18723	7.93535e-05	0.000587902	0.000408447	TLR4/IFNG/JAK2/IL10/CIITA	5
BP	GO:2000510	positive regulation of dendritic cell chemotaxis	5/982	10/18723	7.93535e-05	0.000587902	0.000408447	SLAMF1/CCR7/CCL21/SPI1/CCR6	5
BP	GO:0007163	establishment or maintenance of cell polarity	26/982	218/18723	7.98845e-05	0.000591012	0.000410607	DOCK2/NCKAP1L/RHOH/CD3G/CCR7/CCL4/CCL19/CRTAM/SPRY2/PTK2B/TEK/FOXF1/CCL21/FRMD4A/RAC2/CYTH3/FGF13/DST/TRAF3IP2/MAP7/ARHGEF11/SPN/RHOG/DLG2/GSN/SH3BP1	26
BP	GO:0031623	receptor internalization	17/982	113/18723	8.14275e-05	0.00060159	0.000417956	LILRB1/PLCG2/LILRB4/ARRB2/CALCRL/FCER1G/SYK/CD36/GRB2/SNCA/DNM3/ITGB2/SDCBP/CXCR2/LRP1/NEDD4/ANGPT1	17
BP	GO:0046425	regulation of receptor signaling pathway via JAK-STAT	16/982	103/18723	8.85519e-05	0.000653316	0.000453893	IL10RA/PTPRC/CCL5/IFNG/PTK2B/IL24/GADD45A/SH2B3/JAK2/CYP1B1/CRLF3/CD300A/JAK3/IL10/IL12B/TNF	16
BP	GO:0001916	positive regulation of T cell mediated cytotoxicity	8/982	29/18723	8.90075e-05	0.000654858	0.000454965	PTPRC/CD1D/IL12RB1/HLA-E/B2M/IL12B/HLA-F/HLA-DRA	8
BP	GO:0002862	negative regulation of inflammatory response to antigenic stimulus	8/982	29/18723	8.90075e-05	0.000654858	0.000454965	FGR/FCGR2B/SYK/HCK/FYN/IL10/IL12B/NOD2	8
BP	GO:0032816	positive regulation of natural killer cell activation	7/982	22/18723	9.09604e-05	0.000667378	0.000463663	HLA-E/TYROBP/IL12B/RASGRP1/HLA-F/IL15RA/IL15	7
BP	GO:1900120	regulation of receptor binding	7/982	22/18723	9.09604e-05	0.000667378	0.000463663	PLCL2/B2M/ANXA2/NRP1/IL10/PLCL1/MMP9	7
BP	GO:1904892	regulation of receptor signaling pathway via STAT	17/982	114/18723	9.11054e-05	0.00066752	0.000463761	IL10RA/PTPRC/CCL5/IL7R/IFNG/PTK2B/IL24/GADD45A/SH2B3/JAK2/CYP1B1/CRLF3/CD300A/JAK3/IL10/IL12B/TNF	17
BP	GO:0051047	positive regulation of secretion	33/982	310/18723	9.2409e-05	0.000676139	0.000469749	TLR4/KCNN4/FGR/KMO/IFNG/BMP6/CXCL12/SYK/JAK2/FRMD4A/ADORA1/ADAM8/EDNRB/SNCA/PTAFR/MAP2K6/CAMK2N1/RAB27B/RAB8B/FGA/ITGB2/ANO1/HLA-F/TGFB2/WLS/CD33/ABCG1/SDCBP/LRP1/C1QTNF1/GLUL/S100A8/SOX4	33
BP	GO:0045730	respiratory burst	9/982	37/18723	9.51561e-05	0.000695281	0.000483048	NCF1/PIK3CG/SLAMF8/CYBB/CD52/PIK3CD/NCF4/HCK/RAC2	9
BP	GO:0001763	morphogenesis of a branching structure	24/982	196/18723	9.81145e-05	0.000715913	0.000497382	MET/PRDM1/ACVR1/TNC/STK4/EPHA2/SPRY2/SEMA3C/FOXF1/NRP1/GRB2/IL10/TCF21/WNT2/TIE1/TNF/CTSZ/LRP5/MKS1/CCL11/MAP3K13/HOXA5/EDNRA/PML	24
BP	GO:0030833	regulation of actin filament polymerization	22/982	172/18723	9.9174e-05	0.000722651	0.000502064	WAS/HCLS1/NCKAP1L/CORO1A/GMFG/CCR7/EVL/CDC42EP1/RASA1/CDC42EP3/PTK2B/COTL1/CCL21/HCK/GRB2/CYFIP2/IQGAP2/FER/FCHSD2/CCL11/GSN/CDC42EP4	22
BP	GO:0007200	phospholipase C-activating G protein-coupled receptor signaling pathway	16/982	104/18723	9.96442e-05	0.000725082	0.000503753	GPR18/GPR65/P2RY10/CMKLR1/S1PR1/FPR3/LPAR6/EDNRB/HRH1/C5AR1/FPR1/C3AR1/ANO1/CXCR2/FPR2/CALCA	16
BP	GO:0016525	negative regulation of angiogenesis	20/982	149/18723	0.000103712	0.00075012	0.000521148	FASLG/CCR2/STAB1/EPHA2/HHEX/SPRY2/GADD45A/TEK/VASH1/CXCL10/STAT1/TIE1/ADAMTS1/KLF2/TNF/DCN/TGFB2/EFNA3/HOXA5/PML	20
BP	GO:0002713	negative regulation of B cell mediated immunity	6/982	16/18723	0.000104215	0.00075012	0.000521148	CR1/FCGR2B/PTPN6/PARP3/CR2/FOXP3	6
BP	GO:0002827	positive regulation of T-helper 1 type immune response	6/982	16/18723	0.000104215	0.00075012	0.000521148	SLAMF1/CCR2/IL12RB1/IL12B/IL18R1/IL27RA	6
BP	GO:0002890	negative regulation of immunoglobulin mediated immune response	6/982	16/18723	0.000104215	0.00075012	0.000521148	CR1/FCGR2B/PTPN6/PARP3/CR2/FOXP3	6
BP	GO:0010919	regulation of inositol phosphate biosynthetic process	6/982	16/18723	0.000104215	0.00075012	0.000521148	PLEK/PTK2B/CD244/HRH1/SNCA/PTAFR	6
BP	GO:0033631	cell-cell adhesion mediated by integrin	6/982	16/18723	0.000104215	0.00075012	0.000521148	CCL5/CD3E/CXCL13/ITGA4/DPP4/SKAP1	6
BP	GO:0050862	positive regulation of T cell receptor signaling pathway	6/982	16/18723	0.000104215	0.00075012	0.000521148	TRAT1/LCK/CCR7/CD226/KCNN4/BCL10	6
BP	GO:1903236	regulation of leukocyte tethering or rolling	6/982	16/18723	0.000104215	0.00075012	0.000521148	CCR2/CXCL12/ITGA4/CCL21/PTAFR/FUT7	6
BP	GO:0061572	actin filament bundle organization	21/982	161/18723	0.000106825	0.000767871	0.000533481	WAS/MET/GPR65/PLEK/S1PR1/EVL/LCP1/MICAL1/PTK2B/LIMK1/PLS3/AIF1/NRP1/PTGER4/ITGB5/S100A10/CX3CL1/PHACTR1/CCDC88A/FLNA/HSP90B1	21
BP	GO:0051099	positive regulation of binding	22/982	173/18723	0.000108118	0.000776111	0.000539205	MET/IRF4/PYHIN1/MFNG/APOE/ITGA2/PLCL2/IFNG/STK4/B2M/ANXA2/JAK2/NRP1/S100A10/APP/PLCL1/RALB/MMP9/HSF1/LRP1/ACE/RB1	22
BP	GO:0048732	gland development	42/982	436/18723	0.000110767	0.000794051	0.000551669	MET/BCL11B/ITGA2/STAT5A/TNC/EPHA2/MAFB/HMOX1/SEMA3C/TNFAIP3/FOXF1/PSAP/JAK2/NRP1/ANXA1/CSF1R/IL10/TCF21/HLX/ARID5B/LY6E/PAM/CDO1/WNT2/ETS1/FRZB/CLDN1/TNF/CDKN1B/TGFB2/WLS/CEBPA/LRP5/CPS1/CCL11/CLCN2/FASN/HOXA5/TGFBR3/PML/ROBO1/LBH	42
BP	GO:0007202	activation of phospholipase C activity	8/982	30/18723	0.000115831	0.000829236	0.000576114	ITK/CD86/S1PR4/PLCB2/C5AR1/PHB/TXK/EDNRA	8
BP	GO:0071692	protein localization to extracellular region	37/982	368/18723	0.000118046	0.000843958	0.000586342	CCL5/TLR4/PLEK/NR1H3/KCNN4/APOE/IFNG/BMP6/STEAP3/IDH2/PPP3CA/JAK2/CD200/FRMD4A/SEL1L/ANXA1/ADAM8/DPP4/PAM/IL12B/CAMK2N1/ABCA1/RAB8B/FGA/ANO1/TNF/TGFB2/WLS/CD33/ABCG1/LRP5/PREB/LRP1/CYB5R4/GLUL/NECAB3/SOX4	37
BP	GO:0010742	macrophage derived foam cell differentiation	9/982	38/18723	0.000118935	0.000846891	0.00058838	NR1H3/PRKCH/CSF2/CD36/STAT1/ABCA1/ABCG1/MSR1/PLA2G5	9
BP	GO:0090077	foam cell differentiation	9/982	38/18723	0.000118935	0.000846891	0.00058838	NR1H3/PRKCH/CSF2/CD36/STAT1/ABCA1/ABCG1/MSR1/PLA2G5	9
BP	GO:0097242	amyloid-beta clearance	9/982	38/18723	0.000118935	0.000846891	0.00058838	APOE/IFNG/CD36/C5AR1/C3/ITGB2/TNF/MSR1/LRP1	9
BP	GO:0003170	heart valve development	12/982	65/18723	0.000124171	0.000881376	0.000612339	TNFRSF1B/PRDM1/ACVR1/SLIT3/GJA5/TIE1/NFATC1/TGFB2/JAG1/ROBO1/RB1/SOX4	12
BP	GO:0001952	regulation of cell-matrix adhesion	18/982	128/18723	0.000124334	0.000881376	0.000612339	CD3E/CCR7/RASA1/PTK2B/TEK/ACVRL1/CCL21/NRP1/CD36/S100A10/PLAU/SKAP1/CX3CL1/PLEKHA2/BST1/JAG1/LRP1/IQGAP1	18
BP	GO:0002363	alpha-beta T cell lineage commitment	7/982	23/18723	0.000124863	0.000881376	0.000612339	LY9/IRF4/TBX21/IL12RB1/IL12B/FOXP3/SPN	7
BP	GO:0002758	innate immune response-activating signal transduction	7/982	23/18723	0.000124863	0.000881376	0.000612339	PLCG2/KLRD1/SYK/HCK/FYN/TYROBP/FCN1	7
BP	GO:0006929	substrate-dependent cell migration	7/982	23/18723	0.000124863	0.000881376	0.000612339	PTPRC/ITGA2/STK4/NRP1/ADAM8/SDCBP/ROBO1	7
BP	GO:0043369	CD4-positive or CD8-positive, alpha-beta T cell lineage commitment	7/982	23/18723	0.000124863	0.000881376	0.000612339	LY9/IRF4/TBX21/IL12RB1/IL12B/FOXP3/SPN	7
BP	GO:2000181	negative regulation of blood vessel morphogenesis	20/982	151/18723	0.000124939	0.000881376	0.000612339	FASLG/CCR2/STAB1/EPHA2/HHEX/SPRY2/GADD45A/TEK/VASH1/CXCL10/STAT1/TIE1/ADAMTS1/KLF2/TNF/DCN/TGFB2/EFNA3/HOXA5/PML	20
BP	GO:0032092	positive regulation of protein binding	14/982	85/18723	0.000126788	0.000892048	0.000619753	MFNG/APOE/PLCL2/STK4/B2M/ANXA2/NRP1/APP/PLCL1/RALB/MMP9/HSF1/LRP1/ACE	14
BP	GO:0042509	regulation of tyrosine phosphorylation of STAT protein	14/982	85/18723	0.000126788	0.000892048	0.000619753	CCL5/HCLS1/IFNG/FLT3/IL24/SH2B3/CSF2/JAK2/CSF1R/FYN/IL12B/TNF/HSF1/IL15	14
BP	GO:0010518	positive regulation of phospholipase activity	11/982	56/18723	0.000132322	0.000929756	0.00064595	ITK/CCL5/CD86/S1PR4/PLCB2/C5AR1/PHB/TXK/PTAFR/EDNRA/PLA2G5	11
BP	GO:1904062	regulation of cation transmembrane transport	36/982	357/18723	0.000136859	0.000959556	0.000666654	CORO1A/PDE4B/PLCG2/P2RX1/CTSS/PIK3CG/KCNN4/CXCL9/CCR2/IFNG/PTPN6/PTK2B/KCNAB2/SLC31A2/CXCL10/STAC/FYN/SNCA/CX3CL1/IFNGR2/CAB39/FXYD1/FGF13/ANK3/CXCL11/APP/KCNE4/FLNA/MMP9/PPARGC1A/ADRB2/CCL2/PDE4D/RGS9/NEDD4/CRHBP	36
BP	GO:1901343	negative regulation of vasculature development	20/982	152/18723	0.000136925	0.000959556	0.000666654	FASLG/CCR2/STAB1/EPHA2/HHEX/SPRY2/GADD45A/TEK/VASH1/CXCL10/STAT1/TIE1/ADAMTS1/KLF2/TNF/DCN/TGFB2/EFNA3/HOXA5/PML	20
BP	GO:0001787	natural killer cell proliferation	5/982	11/18723	0.000139194	0.000966534	0.000671502	SLAMF1/HLA-E/IL12B/PTPN22/IL15	5
BP	GO:0002645	positive regulation of tolerance induction	5/982	11/18723	0.000139194	0.000966534	0.000671502	CD3E/LILRB2/LILRB4/FOXP3/IRAK3	5
BP	GO:0002725	negative regulation of T cell cytokine production	5/982	11/18723	0.000139194	0.000966534	0.000671502	SLAMF1/LILRB4/TBX21/FOXP3/HLA-F	5
BP	GO:0033632	regulation of cell-cell adhesion mediated by integrin	5/982	11/18723	0.000139194	0.000966534	0.000671502	CCL5/CD3E/CXCL13/DPP4/SKAP1	5
BP	GO:0043312	neutrophil degranulation	5/982	11/18723	0.000139194	0.000966534	0.000671502	SYK/ANXA3/PTAFR/ITGB2/SPI1	5
BP	GO:0097048	dendritic cell apoptotic process	5/982	11/18723	0.000139194	0.000966534	0.000671502	LILRB1/CCR7/CCL19/CXCL12/CCL21	5
BP	GO:2000668	regulation of dendritic cell apoptotic process	5/982	11/18723	0.000139194	0.000966534	0.000671502	LILRB1/CCR7/CCL19/CXCL12/CCL21	5
BP	GO:0045446	endothelial cell differentiation	17/982	118/18723	0.000140667	0.00097549	0.000677724	PPP1R16B/MET/PECAM1/S1PR1/CXCR4/ACVR1/BMP6/HEG1/ACVRL1/NRP1/TIE1/FOXP3/CLDN1/TNF/JAG1/FASN/PDE4D	17
BP	GO:0050922	negative regulation of chemotaxis	12/982	66/18723	0.000144621	0.0010016	0.000695862	GPR18/CXCL13/STAP1/SLAMF8/SEMA4D/SEMA3C/AIF1/NRP1/DPP4/MMP28/CCL2/ROBO1	12
BP	GO:0071241	cellular response to inorganic substance	26/982	226/18723	0.000144815	0.00100163	0.000695888	NCF1/PLCG2/RASGRP2/CYBB/BMP6/HMOX1/B2M/SYT11/SNCA/MT1F/ANK3/MT1E/CLDN1/CDKN1B/APP/BLM/FABP4/CEBPA/MCOLN1/MMP9/HSF1/PPARGC1A/DLG2/IQGAP1/CRHBP/MT2A	26
BP	GO:2000249	regulation of actin cytoskeleton reorganization	9/982	39/18723	0.000147486	0.00101878	0.000707802	HCLS1/GMFG/STAP1/PTK2B/TEK/HCK/NRP1/CSF1R/IQGAP2	9
BP	GO:2000379	positive regulation of reactive oxygen species metabolic process	13/982	76/18723	0.000147796	0.0010196	0.00070837	TLR4/PLCG2/PTK2B/GADD45A/SYK/CD36/GRB2/TYROBP/AKR1C1/SNCA/ITGB2/TLR6/FPR2	13
BP	GO:0002230	positive regulation of defense response to virus by host	8/982	31/18723	0.000148995	0.00102521	0.000712265	LILRB1/IL12RB1/APOBEC3G/STAT1/IL12B/TRAF3IP2/PTPN22/APOBEC3F	8
BP	GO:0008045	motor neuron axon guidance	8/982	31/18723	0.000148995	0.00102521	0.000712265	RHOH/MYCBP2/NRP1/RAC2/EGR2/RHOG/KIF5C/CHN1	8
BP	GO:0006956	complement activation	18/982	130/18723	0.000151983	0.00104442	0.000725612	CR1/CFP/C1QA/C1S/C1QB/SERPING1/A2M/PHB/CR2/C1R/C3/CD59/FCN1/C7/MFAP4/VSIG4/CFD/CFB	18
BP	GO:0001780	neutrophil homeostasis	6/982	17/18723	0.00015393	0.00105507	0.00073301	PDE4B/CCR2/PIK3CD/SH2B3/ANXA1/CXCR2	6
BP	GO:0045591	positive regulation of regulatory T cell differentiation	6/982	17/18723	0.00015393	0.00105507	0.00073301	LILRB2/LILRB4/CR1/IFNG/FOXP3/HLA-DRA	6
BP	GO:0007411	axon guidance	26/982	227/18723	0.000155587	0.00106505	0.000739945	RHOH/PRKCQ/BCL11B/SEMA4D/EPHA2/MYCBP2/SEMA3C/EFNB2/CXCL12/PLXNC1/SLIT3/NRP1/FYN/RAC2/EGR2/APP/EFNA3/RHOG/FEZ2/LRP1/NPTN/ETV1/DVL1/KIF5C/ROBO1/CHN1	26
BP	GO:0097485	neuron projection guidance	26/982	228/18723	0.000167067	0.00114216	0.000793519	RHOH/PRKCQ/BCL11B/SEMA4D/EPHA2/MYCBP2/SEMA3C/EFNB2/CXCL12/PLXNC1/SLIT3/NRP1/FYN/RAC2/EGR2/APP/EFNA3/RHOG/FEZ2/LRP1/NPTN/ETV1/DVL1/KIF5C/ROBO1/CHN1	26
BP	GO:0046683	response to organophosphorus	18/982	131/18723	0.000167727	0.0011452	0.00079563	P2RX1/PIK3CG/PTK2B/ZFP36L1/TEK/CASP1/STAT1/AKR1C1/P2RX7/PTAFR/CDO1/AQP9/APP/PDE3A/CPS1/CNGA3/HSP90B1/CRHBP	18
BP	GO:0001779	natural killer cell differentiation	7/982	24/18723	0.00016834	0.00114644	0.000796491	PTPRC/SLAMF1/PRDM1/PIK3CD/RASGRP1/IL15RA/IL15	7
BP	GO:0016048	detection of temperature stimulus	7/982	24/18723	0.00016834	0.00114644	0.000796491	CXCR4/ARRB2/LXN/CXCL12/ADORA1/ANO1/CALCA	7
BP	GO:0034767	positive regulation of ion transmembrane transport	21/982	167/18723	0.00018008	0.00122482	0.000850949	PLCG2/P2RX1/CTSS/KCNN4/CXCL9/CCR2/IFNG/CXCL10/STAC/P2RX7/SNCA/CX3CL1/PTAFR/IFNGR2/FXYD1/ANK3/CXCL11/FLNA/ADRB2/CCL2/RGS9	21
BP	GO:0010863	positive regulation of phospholipase C activity	9/982	40/18723	0.000181534	0.00122867	0.00085362	ITK/CD86/S1PR4/PLCB2/C5AR1/PHB/TXK/PTAFR/EDNRA	9
BP	GO:0045429	positive regulation of nitric oxide biosynthetic process	9/982	40/18723	0.000181534	0.00122867	0.00085362	TLR4/IFNG/PTK2B/JAK2/AIF1/CD36/KLF2/TNF/TLR6	9
BP	GO:1904994	regulation of leukocyte adhesion to vascular endothelial cell	9/982	40/18723	0.000181534	0.00122867	0.00085362	CCR2/CXCL12/ITGA4/CCL21/PTAFR/ETS1/ITGB2/TNF/FUT7	9
BP	GO:0050708	regulation of protein secretion	29/982	268/18723	0.000181571	0.00122867	0.00085362	CCL5/TLR4/NR1H3/KCNN4/APOE/IFNG/BMP6/IDH2/PPP3CA/JAK2/CD200/FRMD4A/ANXA1/ADAM8/DPP4/PAM/IL12B/CAMK2N1/FGA/ANO1/TNF/TGFB2/WLS/CD33/ABCG1/LRP5/LRP1/GLUL/SOX4	29
BP	GO:0002763	positive regulation of myeloid leukocyte differentiation	11/982	58/18723	0.000183847	0.00124249	0.000863222	EVI2B/HCLS1/CD4/CCR1/IFNG/ZFP36L1/TYROBP/IL12B/TNF/HSF1/RB1	11
BP	GO:0010743	regulation of macrophage derived foam cell differentiation	8/982	32/18723	0.000189599	0.00127811	0.000887971	NR1H3/PRKCH/CSF2/CD36/ABCA1/ABCG1/MSR1/PLA2G5	8
BP	GO:0050850	positive regulation of calcium-mediated signaling	8/982	32/18723	0.000189599	0.00127811	0.000887971	ZAP70/CD3E/TRAT1/PLCG2/CD4/CCL4/SYK/TNF	8
BP	GO:0030195	negative regulation of blood coagulation	10/982	49/18723	0.000190691	0.00128384	0.00089195	APOE/SERPING1/PLAT/SH2B3/ANXA2/PLAU/FGA/CD34/C1QTNF1/TFPI	10
BP	GO:1903532	positive regulation of secretion by cell	30/982	282/18723	0.00019131	0.00128638	0.000893715	TLR4/KCNN4/FGR/KMO/IFNG/BMP6/CXCL12/SYK/JAK2/FRMD4A/ADAM8/SNCA/PTAFR/MAP2K6/CAMK2N1/RAB27B/RAB8B/FGA/ITGB2/ANO1/HLA-F/TGFB2/WLS/CD33/ABCG1/SDCBP/LRP1/C1QTNF1/GLUL/SOX4	30
BP	GO:0046686	response to cadmium ion	12/982	68/18723	0.000194269	0.00130463	0.000906393	NCF1/CYBB/HMOX1/B2M/HAAO/MT1F/MT1E/CDKN1B/MMP9/CAT/HSF1/MT2A	12
BP	GO:1905954	positive regulation of lipid localization	16/982	110/18723	0.00019536	0.00131029	0.000910328	NR1H3/APOE/FASLG/BMP6/ANXA2/CD36/C3/MAP2K6/PLIN3/ABCA8/ABCA1/ABCG1/MSR1/OSBPL11/LRP1/C1QTNF1	16
BP	GO:0001935	endothelial cell proliferation	23/982	193/18723	0.000204064	0.00136695	0.000949689	PPP1R16B/APOE/STAT5A/BMP6/EPHA2/HMOX1/PIK3CD/TEK/CXCL12/VASH1/ITGA4/ACVRL1/NRP1/STAT1/IL10/IL12B/WNT2/TIE1/TNF/CAV2/CD34/CCL11/CCL2	23
BP	GO:0051258	protein polymerization	31/982	297/18723	0.000212123	0.00141901	0.00098586	WAS/MET/HCLS1/NCKAP1L/CORO1A/GMFG/CCR7/PSTPIP1/EVL/CDC42EP1/RASA1/CDC42EP3/PTK2B/COTL1/GAS7/JAK2/CCL21/AIF1/HCK/GRB2/SNCA/CYFIP2/IQGAP2/FGF13/FGA/CDKN1B/FER/FCHSD2/CCL11/GSN/CDC42EP4	31
BP	GO:0051928	positive regulation of calcium ion transport	17/982	122/18723	0.00021237	0.00141901	0.00098586	CCL5/PLCG2/P2RX1/CCL4/CXCL9/CCR1/ARRB2/CXCL12/TRPV2/CXCL10/STAC/P2RX7/SNCA/LGALS3/CX3CL1/CXCL11/CCL2	17
BP	GO:0002295	T-helper cell lineage commitment	6/982	18/18723	0.000220685	0.00146119	0.00101517	LY9/IRF4/TBX21/IL12RB1/IL12B/SPN	6
BP	GO:0002643	regulation of tolerance induction	6/982	18/18723	0.000220685	0.00146119	0.00101517	CD3E/LILRB2/LILRB4/FOXP3/IL2RA/IRAK3	6
BP	GO:0045953	negative regulation of natural killer cell mediated cytotoxicity	6/982	18/18723	0.000220685	0.00146119	0.00101517	LILRB1/KLRD1/ARRB2/HLA-E/SERPINB9/HLA-F	6
BP	GO:0048535	lymph node development	6/982	18/18723	0.000220685	0.00146119	0.00101517	CXCR5/IL7R/LTA/LTB/TRAF3IP2/IL15	6
BP	GO:0071800	podosome assembly	6/982	18/18723	0.000220685	0.00146119	0.00101517	BIN2/LCP1/CSF2/HCK/TNF/GSN	6
BP	GO:0150079	negative regulation of neuroinflammatory response	6/982	18/18723	0.000220685	0.00146119	0.00101517	PTPRC/TNFRSF1B/CST7/CD200/SYT11/CX3CL1	6
BP	GO:1900225	regulation of NLRP3 inflammasome complex assembly	6/982	18/18723	0.000220685	0.00146119	0.00101517	CARD8/TLR4/PLCG2/CD36/MEFV/TLR6	6
BP	GO:0010594	regulation of endothelial cell migration	26/982	232/18723	0.000220885	0.00146119	0.00101517	MET/CXCL13/CARD10/PIK3CG/APOE/STAT5A/EPHA2/HMOX1/PTK2B/PIK3CD/GADD45A/TEK/VASH1/ACVRL1/NRP1/ANXA3/ANXA1/PRCP/ETS1/MAP3K3/TNF/DCN/MEOX2/GLUL/ANGPT1/SH3BP1	26
BP	GO:1904407	positive regulation of nitric oxide metabolic process	9/982	41/18723	0.000221878	0.00146251	0.00101608	TLR4/IFNG/PTK2B/JAK2/AIF1/CD36/KLF2/TNF/TLR6	9
BP	GO:1905314	semi-lunar valve development	9/982	41/18723	0.000221878	0.00146251	0.00101608	TNFRSF1B/SLIT3/GJA5/TIE1/NFATC1/TGFB2/JAG1/ROBO1/RB1	9
BP	GO:0031579	membrane raft organization	7/982	25/18723	0.000223286	0.00146251	0.00101608	PTPRC/DOCK2/CD2/ANXA2/S100A10/CAV2/GSN	7
BP	GO:0048143	astrocyte activation	7/982	25/18723	0.000223286	0.00146251	0.00101608	IFNG/C1QA/C5AR1/TNF/APP/FPR2/LRP1	7
BP	GO:0050951	sensory perception of temperature stimulus	7/982	25/18723	0.000223286	0.00146251	0.00101608	CXCR4/ARRB2/LXN/CXCL12/ADORA1/ANO1/CALCA	7
BP	GO:0070423	nucleotide-binding oligomerization domain containing signaling pathway	7/982	25/18723	0.000223286	0.00146251	0.00101608	TLR4/CYLD/TNFAIP3/SLC15A3/MAP2K6/NOD2/PTPN22	7
BP	GO:0098581	detection of external biotic stimulus	7/982	25/18723	0.000223286	0.00146251	0.00101608	TLR4/CD1D/TLR1/NAIP/LY96/NOD2/TLR6	7
BP	GO:1904996	positive regulation of leukocyte adhesion to vascular endothelial cell	7/982	25/18723	0.000223286	0.00146251	0.00101608	CCR2/ITGA4/PTAFR/ETS1/ITGB2/TNF/FUT7	7
BP	GO:0060193	positive regulation of lipase activity	12/982	69/18723	0.00022411	0.0014661	0.00101858	ITK/CCL5/NR1H3/CD86/S1PR4/PLCB2/C5AR1/PHB/TXK/PTAFR/EDNRA/PLA2G5	12
BP	GO:0061138	morphogenesis of a branching epithelium	22/982	182/18723	0.000226831	0.00148087	0.00102884	MET/ACVR1/TNC/STK4/EPHA2/SPRY2/SEMA3C/FOXF1/NRP1/GRB2/IL10/TCF21/WNT2/TIE1/TNF/CTSZ/LRP5/MKS1/CCL11/HOXA5/EDNRA/PML	22
BP	GO:0002639	positive regulation of immunoglobulin production	10/982	50/18723	0.000227295	0.00148087	0.00102884	PTPRC/SASH3/TBX21/CD86/HLA-E/CD28/PHB/IL10/TNFRSF4/DNAJB9	10
BP	GO:1900047	negative regulation of hemostasis	10/982	50/18723	0.000227295	0.00148087	0.00102884	APOE/SERPING1/PLAT/SH2B3/ANXA2/PLAU/FGA/CD34/C1QTNF1/TFPI	10
BP	GO:0002664	regulation of T cell tolerance induction	5/982	12/18723	0.000228319	0.00148087	0.00102884	CD3E/LILRB2/LILRB4/FOXP3/IL2RA	5
BP	GO:0032490	detection of molecule of bacterial origin	5/982	12/18723	0.000228319	0.00148087	0.00102884	TLR4/TLR1/LY96/NOD2/TLR6	5
BP	GO:0060907	positive regulation of macrophage cytokine production	5/982	12/18723	0.000228319	0.00148087	0.00102884	LILRB1/TLR4/PLCG2/LAPTM5/CD36	5
BP	GO:0070493	thrombin-activated receptor signaling pathway	5/982	12/18723	0.000228319	0.00148087	0.00102884	MET/PLEK/HPGD/SNCA/IQGAP2	5
BP	GO:0042542	response to hydrogen peroxide	19/982	146/18723	0.000230326	0.00149206	0.00103662	MET/IL18RAP/CAPN2/IL18BP/HMOX1/PTK2B/TNFAIP3/SIRPA/CYP1B1/ANXA1/FYN/STAT1/IL10/ETS1/KLF2/CAT/HSF1/PCGF2/SETX	19
BP	GO:0070588	calcium ion transmembrane transport	32/982	312/18723	0.000232454	0.00150401	0.00104492	PTPRC/LCK/CORO1A/PDE4B/CCR7/PLCG2/P2RX1/PIK3CG/FASLG/CCL19/CXCL9/CCR5/PTPN6/PTK2B/ANXA6/ANXA2/TRPV2/CXCL10/CCL21/STAC/FYN/P2RX7/SNCA/CX3CL1/CXCL11/ANXA2P2/ITPR1/MCOLN1/RASA3/PDE4D/RGS9/GPM6A	32
BP	GO:0030198	extracellular matrix organization	31/982	301/18723	0.000268776	0.0017369	0.00120672	TNFRSF1B/CTSS/LCP1/MMP25/FOXF1/ANXA2/EGFL6/CYP1B1/TGFBI/ADAM8/DPP4/FBLN1/FBLN5/COL14A1/MMP28/ETS1/TIE1/ADAMTS1/CRISPLD2/MMP19/TNF/APP/CAV2/MFAP4/TGFB2/ADAMTS8/MMP9/DPT/LRP1/RB1/COL8A1	31
BP	GO:1900274	regulation of phospholipase C activity	9/982	42/18723	0.000269392	0.00173877	0.00120802	ITK/CD86/S1PR4/PLCB2/C5AR1/PHB/TXK/PTAFR/EDNRA	9
BP	GO:0043062	extracellular structure organization	31/982	302/18723	0.000284891	0.00183658	0.00127597	TNFRSF1B/CTSS/LCP1/MMP25/FOXF1/ANXA2/EGFL6/CYP1B1/TGFBI/ADAM8/DPP4/FBLN1/FBLN5/COL14A1/MMP28/ETS1/TIE1/ADAMTS1/CRISPLD2/MMP19/TNF/APP/CAV2/MFAP4/TGFB2/ADAMTS8/MMP9/DPT/LRP1/RB1/COL8A1	31
BP	GO:0019883	antigen processing and presentation of endogenous antigen	7/982	26/18723	0.000291814	0.00187439	0.00130224	CD1D/HLA-E/B2M/TAP1/HLA-F/TAP2/HLA-DRA	7
BP	GO:0035872	nucleotide-binding domain, leucine rich repeat containing receptor signaling pathway	7/982	26/18723	0.000291814	0.00187439	0.00130224	TLR4/CYLD/TNFAIP3/SLC15A3/MAP2K6/NOD2/PTPN22	7
BP	GO:1900017	positive regulation of cytokine production involved in inflammatory response	7/982	26/18723	0.000291814	0.00187439	0.00130224	CD6/TLR4/GPSM3/TNF/IL17RA/NOD2/TLR6	7
BP	GO:0050818	regulation of coagulation	12/982	71/18723	0.000295617	0.00189468	0.00131633	APOE/SERPING1/PLAT/SH2B3/ANXA2/CD36/PLAU/FGA/CD34/PROCR/C1QTNF1/TFPI	12
BP	GO:0045471	response to ethanol	18/982	137/18723	0.000295686	0.00189468	0.00131633	CD27/CYBB/TNC/HPGD/PTK2B/CD14/TBXAS1/FYN/CDO1/VCAM1/SPI1/CLDN1/CAT/FECH/CA3/CLDN18/S100A8/CRHBP	18
BP	GO:0002446	neutrophil mediated immunity	8/982	34/18723	0.000298135	0.00189892	0.00131928	DNASE1L3/SYK/ANXA3/PTAFR/ITGB2/SPI1/ACE/IRAK4	8
BP	GO:0030851	granulocyte differentiation	8/982	34/18723	0.000298135	0.00189892	0.00131928	EVI2B/HCLS1/INPP5D/CBFA2T3/CSF2/SPI1/CEBPA/FASN	8
BP	GO:0035590	purinergic nucleotide receptor signaling pathway	8/982	34/18723	0.000298135	0.00189892	0.00131928	P2RY10/GPR171/P2RX1/P2RY13/P2RY14/ADORA1/P2RX7/PTAFR	8
BP	GO:0055094	response to lipoprotein particle	8/982	34/18723	0.000298135	0.00189892	0.00131928	TLR4/APOE/FCER1G/SYK/CD36/ABCA1/ITGB2/TLR6	8
BP	GO:0070232	regulation of T cell apoptotic process	8/982	34/18723	0.000298135	0.00189892	0.00131928	CCL5/CD27/PRKCQ/IL7R/IDO1/ADAM8/JAK3/LGALS3	8
BP	GO:0003205	cardiac chamber development	20/982	161/18723	0.000299267	0.00190384	0.0013227	PRDM1/ACVR1/SEMA3C/HEG1/TEK/FOXF1/SLIT3/GJA5/NRP1/LY6E/WNT2/ADAMTS1/TGFB2/MKS1/JAG1/CNTRL/TGFBR3/ROBO1/LUZP1/SOX4	20
BP	GO:0003279	cardiac septum development	15/982	103/18723	0.000302139	0.00191981	0.00133379	PRDM1/ACVR1/SEMA3C/HEG1/SLIT3/GJA5/NRP1/TGFB2/MKS1/JAG1/CNTRL/TGFBR3/ROBO1/LUZP1/SOX4	15
BP	GO:0002483	antigen processing and presentation of endogenous peptide antigen	6/982	19/18723	0.000308293	0.00194727	0.00135287	HLA-E/B2M/TAP1/HLA-F/TAP2/HLA-DRA	6
BP	GO:0044546	NLRP3 inflammasome complex assembly	6/982	19/18723	0.000308293	0.00194727	0.00135287	CARD8/TLR4/PLCG2/CD36/MEFV/TLR6	6
BP	GO:0061760	antifungal innate immune response	6/982	19/18723	0.000308293	0.00194727	0.00135287	PLCG2/BCL10/CLEC4E/SPI1/RARRES2/PLA2G5	6
BP	GO:0140131	positive regulation of lymphocyte chemotaxis	6/982	19/18723	0.000308293	0.00194727	0.00135287	CCL5/CXCL13/CCL4/CCR2/PTK2B/CCL21	6
BP	GO:1903975	regulation of glial cell migration	6/982	19/18723	0.000308293	0.00194727	0.00135287	STAP1/CCR2/IDH2/GPR183/CX3CL1/LRP1	6
BP	GO:0048260	positive regulation of receptor-mediated endocytosis	10/982	52/18723	0.000318318	0.0020082	0.0013952	PLCG2/CCL19/ARRB2/B2M/SYK/ANXA2/CCL21/C3/HIP1/ANGPT1	10
BP	GO:0045229	external encapsulating structure organization	31/982	304/18723	0.000319723	0.00201467	0.0013997	TNFRSF1B/CTSS/LCP1/MMP25/FOXF1/ANXA2/EGFL6/CYP1B1/TGFBI/ADAM8/DPP4/FBLN1/FBLN5/COL14A1/MMP28/ETS1/TIE1/ADAMTS1/CRISPLD2/MMP19/TNF/APP/CAV2/MFAP4/TGFB2/ADAMTS8/MMP9/DPT/LRP1/RB1/COL8A1	31
BP	GO:0046636	negative regulation of alpha-beta T cell activation	9/982	43/18723	0.000325029	0.00204568	0.00142124	LILRB1/RUNX3/TBX21/TNFRSF14/ANXA1/CD300A/JAK3/HLX/FOXP3	9
BP	GO:0090630	activation of GTPase activity	16/982	115/18723	0.00032824	0.00206344	0.00143358	ARHGAP25/GPR65/CCR7/CXCL13/EPHA2/PTK2B/ADPRH/CCL21/TBC1D9/RASGRP1/GMIP/RHOG/TBC1D4/GRTP1/ABR/TBC1D2B	16
BP	GO:0031272	regulation of pseudopodium assembly	5/982	13/18723	0.000355026	0.0022161	0.00153964	CCR7/CDC42EP1/CDC42EP3/CCL21/CDC42EP4	5
BP	GO:0031274	positive regulation of pseudopodium assembly	5/982	13/18723	0.000355026	0.0022161	0.00153964	CCR7/CDC42EP1/CDC42EP3/CCL21/CDC42EP4	5
BP	GO:0042492	gamma-delta T cell differentiation	5/982	13/18723	0.000355026	0.0022161	0.00153964	PTPRC/GPR18/NCKAP1L/SYK/SOX4	5
BP	GO:0048302	regulation of isotype switching to IgG isotypes	5/982	13/18723	0.000355026	0.0022161	0.00153964	PTPRC/TBX21/CD28/FOXP3/IL27RA	5
BP	GO:0071801	regulation of podosome assembly	5/982	13/18723	0.000355026	0.0022161	0.00153964	LCP1/CSF2/HCK/TNF/GSN	5
BP	GO:0072672	neutrophil extravasation	5/982	13/18723	0.000355026	0.0022161	0.00153964	PECAM1/PIK3CG/PIK3CD/ADAM8/FUT7	5
BP	GO:0048754	branching morphogenesis of an epithelial tube	19/982	151/18723	0.000356087	0.00221751	0.00154062	MET/ACVR1/TNC/STK4/EPHA2/SPRY2/FOXF1/NRP1/TCF21/WNT2/TIE1/TNF/CTSZ/LRP5/MKS1/CCL11/HOXA5/EDNRA/PML	19
BP	GO:1904064	positive regulation of cation transmembrane transport	19/982	151/18723	0.000356087	0.00221751	0.00154062	PLCG2/P2RX1/CTSS/KCNN4/CXCL9/CCR2/IFNG/CXCL10/STAC/SNCA/CX3CL1/IFNGR2/FXYD1/ANK3/CXCL11/FLNA/ADRB2/CCL2/RGS9	19
BP	GO:0009410	response to xenobiotic stimulus	42/982	462/18723	0.000383207	0.0023836	0.00165601	NCKAP1L/LCK/PDE4B/CXCR4/ITGA2/DUSP6/SLAMF8/CYBB/LTA/HMOX1/PTK2B/SEMA3C/SLC1A3/B2M/BCAR3/CYP1B1/ANXA1/FYN/STAT1/IL10/AOX1/S100A10/FMO2/AKR1C1/SNCA/PAM/CDH3/MAP2K6/ABCA1/TRAF3IP2/CDKN1B/TGFB2/RORA/PDE3A/GNA12/CAT/CPS1/PPARGC1A/FECH/MCM7/RB1/CRHBP	42
BP	GO:0051098	regulation of binding	35/982	363/18723	0.000394523	0.00245112	0.00170292	MET/IRF4/GZMA/PYHIN1/MFNG/APOE/ITGA2/PLCL2/ARRB2/IFNG/STK4/HMOX1/B2M/ITGA4/ANXA2/PPP3CA/SUMO3/JAK2/NRP1/IL10/S100A10/APP/CTSZ/PLCL1/RALB/MMP9/HSF1/LRP1/ACE/ADRB2/CSNK1A1/DVL1/TGFBR3/ANGPT1/RB1	35
BP	GO:0010921	regulation of phosphatase activity	13/982	84/18723	0.000411258	0.0025521	0.00177308	PTPRC/NCKAP1L/PLEK/ITGA2/SEMA4D/IFNG/JAK2/CD300A/LGALS3/TNF/TGFB2/CD33/HSP90B1	13
BP	GO:0035821	modulation of process of other organism	15/982	106/18723	0.000414557	0.00256957	0.00178522	CCL5/PRF1/APOE/CD4/CCL4/IFNG/SYK/PHB/P2RX7/SERPINB9/FCER2/CCL8/CAV2/SFTPD/BCL2L1	15
BP	GO:0045063	T-helper 1 cell differentiation	6/982	20/18723	0.000420985	0.00260334	0.00180868	CCL19/ANXA1/JAK3/HLX/SPN/IL18R1	6
BP	GO:0098543	detection of other organism	6/982	20/18723	0.000420985	0.00260334	0.00180868	TLR4/CD1D/TLR1/NAIP/NOD2/TLR6	6
BP	GO:0006801	superoxide metabolic process	12/982	74/18723	0.000438627	0.00270929	0.00188228	NCF1/CYBB/ACP5/NCF4/SYK/CD36/TYROBP/FBLN5/ITGB2/BST1/FPR2/CYB5R4	12
BP	GO:0045742	positive regulation of epidermal growth factor receptor signaling pathway	8/982	36/18723	0.000452708	0.00278977	0.0019382	NCF1/FASLG/EREG/BCAR3/ADORA1/CCDC88A/MMP9/HIP1	8
BP	GO:0090322	regulation of superoxide metabolic process	8/982	36/18723	0.000452708	0.00278977	0.0019382	ACP5/SYK/CD36/TYROBP/FBLN5/ITGB2/BST1/FPR2	8
BP	GO:0001655	urogenital system development	33/982	338/18723	0.00045784	0.00281487	0.00195564	PECAM1/PRDM1/TNC/BMP6/HPGD/TEK/FOXF1/PSAP/NRP1/ANXA1/C1GALT1/STAT1/TCF21/ARID5B/ADAMTS1/EPCAM/TRAF3IP2/CDKN1B/DCN/TGFB2/ITGA8/CD34/TIPARP/MMP9/CAT/JAG1/CXCR2/ACE/CNTRL/NLE1/IQGAP1/ANGPT1/SOX4	33
BP	GO:0018209	peptidyl-serine modification	33/982	338/18723	0.00045784	0.00281487	0.00195564	PRKCB/MAP4K1/HCLS1/PRKCQ/RASSF2/PLCL2/ARRB2/IFNG/STK4/SPRY2/PRKCH/TCL1A/IL24/GADD45A/BCAR3/SYK/MAST3/MAPKAPK3/GALNT3/ATM/SNCA/CAB39/CAMK4/TNF/DCN/APP/PLCL1/RPS6KA3/MAP3K13/CSNK1A1/CREBL2/PDE4D/ANGPT1	33
BP	GO:0071354	cellular response to interleukin-6	9/982	45/18723	0.000464888	0.0028549	0.00198345	GFI1/SELPLG/JAK2/PTGIS/PHB/SPI1/FER/CEBPA/PPARGC1A	9
BP	GO:0001936	regulation of endothelial cell proliferation	21/982	179/18723	0.000468006	0.00287073	0.00199445	PPP1R16B/APOE/STAT5A/BMP6/HMOX1/PIK3CD/TEK/CXCL12/VASH1/ITGA4/ACVRL1/NRP1/STAT1/IL10/IL12B/WNT2/TIE1/TNF/CAV2/CCL11/CCL2	21
BP	GO:0060562	epithelial tube morphogenesis	32/982	325/18723	0.000479064	0.00292227	0.00203026	MET/CXCR4/ACVR1/BCL10/TNC/STK4/EPHA2/SPRY2/ITGAX/PIK3CD/FOXF1/ACVRL1/CXCL10/NRP1/CSF1R/TCF21/WNT2/TIE1/TNF/MICAL2/TGFB2/CTSZ/LRP5/MKS1/CXCR2/CCL11/DVL1/HOXA5/EDNRA/PML/LUZP1/SOX4	32
BP	GO:0001945	lymph vessel development	7/982	28/18723	0.00047916	0.00292227	0.00203026	EPHA2/HEG1/VASH1/SYK/ACVRL1/TIE1/SVEP1	7
BP	GO:0032607	interferon-alpha production	7/982	28/18723	0.00047916	0.00292227	0.00203026	TLR4/TLR8/TLR7/LILRA4/STAT1/IL10/IRF5	7
BP	GO:0032647	regulation of interferon-alpha production	7/982	28/18723	0.00047916	0.00292227	0.00203026	TLR4/TLR8/TLR7/LILRA4/STAT1/IL10/IRF5	7
BP	GO:0032958	inositol phosphate biosynthetic process	7/982	28/18723	0.00047916	0.00292227	0.00203026	PLEK/PLCG2/PTK2B/CD244/HRH1/SNCA/PTAFR	7
BP	GO:0034614	cellular response to reactive oxygen species	19/982	155/18723	0.000496101	0.00302212	0.00209963	NCF1/MET/IL18RAP/BTK/IL18BP/TNFAIP3/SIRPA/CYP1B1/CD36/ANXA1/IL10/FBLN5/ETS1/KLF2/FER/MMP9/HSF1/PCGF2/SETX	19
BP	GO:0007173	epidermal growth factor receptor signaling pathway	15/982	108/18723	0.000507965	0.00309085	0.00214738	NCF1/RASSF2/FASLG/EREG/PTK2B/BCAR3/ADORA1/GRB2/PTPN12/FER/CCDC88A/MMP9/HIP1/IQGAP1/MVP	15
BP	GO:0003179	heart valve morphogenesis	10/982	55/18723	0.000510435	0.00310232	0.00215535	ACVR1/SLIT3/GJA5/TIE1/NFATC1/TGFB2/JAG1/ROBO1/RB1/SOX4	10
BP	GO:0072577	endothelial cell apoptotic process	11/982	65/18723	0.000517108	0.00313929	0.00218103	FASLG/CD40LG/TNFAIP3/TEK/ITGA4/IL10/FGA/TNF/PAK4/CCL2/ANGPT1	11
BP	GO:0120162	positive regulation of cold-induced thermogenesis	14/982	97/18723	0.000520972	0.00315914	0.00219482	IRF4/CMKLR1/CXCR4/CCR2/PDGFC/SYK/TRPV2/JAK2/CD36/G0S2/FABP4/HSF1/PPARGC1A/ADRB2	14
BP	GO:0002475	antigen processing and presentation via MHC class Ib	5/982	14/18723	0.000528491	0.00318293	0.00221135	CD1D/HLA-E/B2M/HLA-F/TAP2	5
BP	GO:0002829	negative regulation of type 2 immune response	5/982	14/18723	0.000528491	0.00318293	0.00221135	TBX21/CCR2/ANXA1/HLX/IL27RA	5
BP	GO:0035589	G protein-coupled purinergic nucleotide receptor signaling pathway	5/982	14/18723	0.000528491	0.00318293	0.00221135	P2RY10/GPR171/P2RY13/P2RY14/PTAFR	5
BP	GO:0048291	isotype switching to IgG isotypes	5/982	14/18723	0.000528491	0.00318293	0.00221135	PTPRC/TBX21/CD28/FOXP3/IL27RA	5
BP	GO:0050966	detection of mechanical stimulus involved in sensory perception of pain	5/982	14/18723	0.000528491	0.00318293	0.00221135	CXCR4/ITGA2/CXCL12/FYN/SCN1A	5
BP	GO:0072540	T-helper 17 cell lineage commitment	5/982	14/18723	0.000528491	0.00318293	0.00221135	LY9/IRF4/TBX21/IL12RB1/IL12B	5
BP	GO:0032271	regulation of protein polymerization	25/982	233/18723	0.000557767	0.00335544	0.0023312	WAS/MET/HCLS1/NCKAP1L/CORO1A/GMFG/CCR7/EVL/CDC42EP1/RASA1/CDC42EP3/PTK2B/COTL1/CCL21/HCK/GRB2/SNCA/CYFIP2/IQGAP2/CDKN1B/FER/FCHSD2/CCL11/GSN/CDC42EP4	25
BP	GO:0002689	negative regulation of leukocyte chemotaxis	6/982	21/18723	0.0005634	0.00336646	0.00233886	GPR18/STAP1/SLAMF8/DPP4/MMP28/CCL2	6
BP	GO:0003177	pulmonary valve development	6/982	21/18723	0.0005634	0.00336646	0.00233886	TNFRSF1B/GJA5/NFATC1/TGFB2/JAG1/ROBO1	6
BP	GO:0006925	inflammatory cell apoptotic process	6/982	21/18723	0.0005634	0.00336646	0.00233886	PLEKHO2/FASLG/PIK3CD/ANXA1/NOD2/CXCR2	6
BP	GO:0007252	I-kappaB phosphorylation	6/982	21/18723	0.0005634	0.00336646	0.00233886	TLR4/PLCG2/TLR7/SIRPA/CX3CL1/TNF	6
BP	GO:0061081	positive regulation of myeloid leukocyte cytokine production involved in immune response	6/982	21/18723	0.0005634	0.00336646	0.00233886	LILRB1/TLR4/PLCG2/LAPTM5/BCL10/CD36	6
BP	GO:0070269	pyroptosis	6/982	21/18723	0.0005634	0.00336646	0.00233886	GZMA/GZMB/ZBP1/CASP1/NAIP/NLRP1	6
BP	GO:0019915	lipid storage	13/982	87/18723	0.000581782	0.00347239	0.00241245	NR1H3/APOE/GM2A/CD36/C3/PLIN3/ABCA1/PLA2G4C/TNF/ABCG1/MSR1/OSBPL11/NRIP1	13
BP	GO:0002455	humoral immune response mediated by circulating immunoglobulin	16/982	121/18723	0.000584728	0.00348215	0.00241923	PTPRC/CR1/LTA/C1QA/FCGR2B/PTPN6/C1S/C1QB/SERPING1/CR2/C1R/C3/FCER2/C7/TNF/NOD2	16
BP	GO:0003206	cardiac chamber morphogenesis	16/982	121/18723	0.000584728	0.00348215	0.00241923	ACVR1/SEMA3C/HEG1/TEK/FOXF1/SLIT3/NRP1/LY6E/WNT2/ADAMTS1/TGFB2/MKS1/JAG1/TGFBR3/ROBO1/SOX4	16
BP	GO:0018105	peptidyl-serine phosphorylation	31/982	315/18723	0.000587645	0.0034956	0.00242858	PRKCB/MAP4K1/HCLS1/PRKCQ/RASSF2/PLCL2/ARRB2/IFNG/STK4/SPRY2/PRKCH/TCL1A/IL24/GADD45A/BCAR3/SYK/MAST3/MAPKAPK3/ATM/SNCA/CAB39/CAMK4/TNF/APP/PLCL1/RPS6KA3/MAP3K13/CSNK1A1/CREBL2/PDE4D/ANGPT1	31
BP	GO:0030193	regulation of blood coagulation	11/982	66/18723	0.000591605	0.00351522	0.00244221	APOE/SERPING1/PLAT/SH2B3/ANXA2/CD36/PLAU/FGA/CD34/C1QTNF1/TFPI	11
BP	GO:0031529	ruffle organization	10/982	56/18723	0.000592633	0.00351739	0.00244372	PLEK/CCR7/STAP1/EVL/CCL21/AIF1/SNX10/CSF1R/RHOG/PLEKHM1	10
BP	GO:0034599	cellular response to oxidative stress	29/982	288/18723	0.000603272	0.00356477	0.00247663	NCF1/MET/IL18RAP/TLR4/BTK/IL18BP/HMOX1/TNFAIP3/SIRPA/JAK2/AIF1/CYP1B1/CD36/ANXA1/FYN/IL10/FBLN5/SNCA/ETS1/KLF2/FER/MMP9/HSF1/TLR6/PPARGC1A/PML/PCGF2/SETX/ATF4	29
BP	GO:0002360	T cell lineage commitment	7/982	29/18723	0.000603299	0.00356477	0.00247663	LY9/IRF4/TBX21/IL12RB1/IL12B/FOXP3/SPN	7
BP	GO:0060441	epithelial tube branching involved in lung morphogenesis	7/982	29/18723	0.000603299	0.00356477	0.00247663	TNC/SPRY2/FOXF1/WNT2/TNF/CTSZ/HOXA5	7
BP	GO:0072539	T-helper 17 cell differentiation	7/982	29/18723	0.000603299	0.00356477	0.00247663	LY9/IRF4/TBX21/IL12RB1/IL12B/FOXP3/RORA	7
BP	GO:0014812	muscle cell migration	15/982	110/18723	0.000618787	0.00365222	0.00253739	CCL5/TLR4/ITGA2/PLEKHO1/PLAT/AIF1/NRP1/ANXA1/PLAU/ADAMTS1/GNA12/LRP1/ACE/PPARGC1A/IQGAP1	15
BP	GO:0043393	regulation of protein binding	22/982	196/18723	0.000638598	0.00376497	0.00261572	MFNG/APOE/PLCL2/ARRB2/STK4/B2M/ITGA4/ANXA2/NRP1/IL10/APP/CTSZ/PLCL1/RALB/MMP9/HSF1/LRP1/ACE/ADRB2/DVL1/TGFBR3/ANGPT1	22
BP	GO:0042311	vasodilation	9/982	47/18723	0.000650732	0.00382377	0.00265658	APOE/GJA5/ADORA1/EDNRB/KCNMA1/KLF2/CPS1/ADRB2/CALCA	9
BP	GO:0045646	regulation of erythrocyte differentiation	9/982	47/18723	0.000650732	0.00382377	0.00265658	NCKAP1L/INPP5D/MAFB/ZFP36L1/B2M/STAT1/ETS1/SPI1/HOXA5	9
BP	GO:0120163	negative regulation of cold-induced thermogenesis	9/982	47/18723	0.000650732	0.00382377	0.00265658	TLR4/NR1H3/PLCL2/MAP2K6/PLCL1/IL18R1/IL15/RB1/ATF4	9
BP	GO:0048469	cell maturation	20/982	171/18723	0.000657258	0.00385785	0.00268025	BTK/CCL19/EREG/C1QA/PTK2B/CCL21/EDNRB/C3/CX3CL1/KLF2/APP/PDE3A/CCR6/CEBPA/CABYR/MAP3K13/LHX6/IL15/HOXA5/RB1	20
BP	GO:0009595	detection of biotic stimulus	8/982	38/18723	0.000666652	0.00390436	0.00271256	TLR4/CD1D/CRTAM/TLR1/NAIP/LY96/NOD2/TLR6	8
BP	GO:1901186	positive regulation of ERBB signaling pathway	8/982	38/18723	0.000666652	0.00390436	0.00271256	NCF1/FASLG/EREG/BCAR3/ADORA1/CCDC88A/MMP9/HIP1	8
BP	GO:0061180	mammary gland epithelium development	11/982	67/18723	0.000674836	0.0039436	0.00273983	EPHA2/FOXF1/JAK2/CSF1R/WNT2/LRP5/CCL11/HOXA5/PML/ROBO1/LBH	11
BP	GO:0070527	platelet aggregation	11/982	67/18723	0.000674836	0.0039436	0.00273983	PRKCQ/PLEK/PIK3CG/PTPN6/TSPAN32/SH2B3/SYK/JAK2/FGA/FLNA/C1QTNF1	11
BP	GO:1901136	carbohydrate derivative catabolic process	20/982	172/18723	0.000707973	0.00413269	0.0028712	NT5E/NPL/AOAH/PDE4B/UPP1/SAMHD1/GM2A/APOBEC3G/NAGK/LYVE1/NTHL1/MGAT1/IDS/TYMP/BPGM/EDEM1/RENBP/PDE4D/APOBEC3F/MAN1A1	20
BP	GO:0060840	artery development	14/982	100/18723	0.00071178	0.00415035	0.00288347	PRDM1/APOE/HPGD/FOXF1/ACVRL1/GJA5/NRP1/TGFB2/JAG1/LRP1/CNTRL/ROBO1/LUZP1/SOX4	14
BP	GO:0043154	negative regulation of cysteine-type endopeptidase activity involved in apoptotic process	12/982	78/18723	0.000716419	0.00417283	0.00289908	CD27/MICAL1/ARRB2/LAMP3/TNFSF14/SNCA/NAIP/SERPINB9/TNF/RPS6KA3/MMP9/NLE1	12
BP	GO:0043433	negative regulation of DNA-binding transcription factor activity	21/982	185/18723	0.000724601	0.00421586	0.00292898	CARD8/CMKLR1/GFI1/ARRB2/HMOX1/CYLD/TNFAIP3/CD200/CYP1B1/PTGIS/IL10/TNFRSF4/BHLHE40/TRAF3/FOXP3/SPI1/FLNA/NOD2/CAT/IRAK3/RB1	21
BP	GO:0002220	innate immune response activating cell surface receptor signaling pathway	6/982	22/18723	0.000740565	0.00428995	0.00298045	PLCG2/KLRD1/SYK/FYN/TYROBP/FCN1	6
BP	GO:0032700	negative regulation of interleukin-17 production	6/982	22/18723	0.000740565	0.00428995	0.00298045	NCKAP1L/TLR4/IFNG/IL12B/FOXP3/IL27RA	6
BP	GO:0043371	negative regulation of CD4-positive, alpha-beta T cell differentiation	6/982	22/18723	0.000740565	0.00428995	0.00298045	RUNX3/TBX21/ANXA1/JAK3/HLX/FOXP3	6
BP	GO:0045624	positive regulation of T-helper cell differentiation	6/982	22/18723	0.000740565	0.00428995	0.00298045	CCL19/CD86/IL12RB1/ANXA1/HLX/IL12B	6
BP	GO:0045940	positive regulation of steroid metabolic process	7/982	30/18723	0.00075166	0.00434736	0.00302034	APOE/IFNG/BMP6/APOC1/TNF/ABCG1/PPARGC1A	7
BP	GO:0014074	response to purine-containing compound	18/982	148/18723	0.000757292	0.00434736	0.00302034	P2RX1/PIK3CG/PTK2B/ZFP36L1/TEK/CASP1/STAT1/P2RX7/PTAFR/CDO1/AQP9/APP/PDE3A/CPS1/PPARGC1A/CNGA3/HSP90B1/CRHBP	18
BP	GO:0002679	respiratory burst involved in defense response	5/982	15/18723	0.00075866	0.00434736	0.00302034	NCF1/PIK3CG/SLAMF8/PIK3CD/HCK	5
BP	GO:0031269	pseudopodium assembly	5/982	15/18723	0.00075866	0.00434736	0.00302034	CCR7/CDC42EP1/CDC42EP3/CCL21/CDC42EP4	5
BP	GO:0042976	activation of Janus kinase activity	5/982	15/18723	0.00075866	0.00434736	0.00302034	CCL5/PTK2B/JAK2/CD300A/IL12B	5
BP	GO:0045986	negative regulation of smooth muscle contraction	5/982	15/18723	0.00075866	0.00434736	0.00302034	CALCRL/ADORA1/KCNMA1/ADRB2/CALCA	5
BP	GO:0046007	negative regulation of activated T cell proliferation	5/982	15/18723	0.00075866	0.00434736	0.00302034	LILRB4/CRTAM/BTN2A2/PDCD1LG2/FOXP3	5
BP	GO:0098760	response to interleukin-7	5/982	15/18723	0.00075866	0.00434736	0.00302034	IL2RG/BTK/IL7R/LSP1/ATIC	5
BP	GO:0098761	cellular response to interleukin-7	5/982	15/18723	0.00075866	0.00434736	0.00302034	IL2RG/BTK/IL7R/LSP1/ATIC	5
BP	GO:0140374	antiviral innate immune response	5/982	15/18723	0.00075866	0.00434736	0.00302034	CARD8/CXCL10/PHB/AKAP1/NLRP1	5
BP	GO:0007585	respiratory gaseous exchange by respiratory system	11/982	68/18723	0.000767577	0.00438899	0.00304926	CSF2RB/MAFB/CHST11/ADORA1/HNMT/SFTPC/TRAF4/BPGM/SFTPD/HOXA5/EDNRA	11
BP	GO:1900046	regulation of hemostasis	11/982	68/18723	0.000767577	0.00438899	0.00304926	APOE/SERPING1/PLAT/SH2B3/ANXA2/CD36/PLAU/FGA/CD34/C1QTNF1/TFPI	11
BP	GO:0031345	negative regulation of cell projection organization	21/982	186/18723	0.000777478	0.00443605	0.00308196	STAP1/EVL/GFI1/APOE/SEMA4D/SPRY2/SEMA3C/EFNB2/B2M/PPP3CA/CCL21/NRP1/FYN/PTPRG/FGF13/DNM3/CTSZ/FLNA/DGUOK/LRP1/PMP22	21
BP	GO:0120032	regulation of plasma membrane bounded cell projection assembly	21/982	186/18723	0.000777478	0.00443605	0.00308196	WAS/PPP1R16B/CCR7/STAP1/EVL/CCL19/CDC42EP1/EPHA2/CDC42EP3/CYLD/CCL21/NRP1/P2RX7/RAC2/DNM3/FER/CCDC88A/RHOG/GPM6A/CDC42EP4/PLEKHM1	21
BP	GO:0032481	positive regulation of type I interferon production	10/982	58/18723	0.000789977	0.00450253	0.00312815	TLR4/PLCG2/TLR8/IRF1/TLR7/CD14/SYK/STAT1/IRF5/PTPN22	10
BP	GO:0002347	response to tumor cell	8/982	39/18723	0.00080063	0.00455836	0.00316693	PRF1/CD226/LAPTM5/CRTAM/HNMT/IL12B/SPI1/FBXO38	8
BP	GO:0034109	homotypic cell-cell adhesion	13/982	90/18723	0.000808495	0.00458838	0.00318779	CCL5/PRKCQ/PLEK/PIK3CG/PTPN6/TSPAN32/SH2B3/SYK/JAK2/ANK3/FGA/FLNA/C1QTNF1	13
BP	GO:0045638	negative regulation of myeloid cell differentiation	13/982	90/18723	0.000808495	0.00458838	0.00318779	LILRB1/TLR4/GPR171/LILRB4/LILRB3/INPP5D/MAFB/PTK2B/ZFP36L1/GPR137B/MEIS1/HOXA5/CLDN18	13
BP	GO:0061097	regulation of protein tyrosine kinase activity	13/982	90/18723	0.000808495	0.00458838	0.00318779	PTPRC/NCF1/CCL5/LILRB4/STAP1/EREG/ADORA1/CSF1R/PTPN1/APP/ACE/FCGR1A/MVP	13
BP	GO:0021700	developmental maturation	28/982	280/18723	0.000827503	0.00469124	0.00325926	BTK/RAB38/S1PR1/SEMA4D/CCL19/EREG/C1QA/PTK2B/ACVRL1/CCL21/SNX10/EDNRB/C3/LYL1/CDH3/CX3CL1/KLF2/APP/TGFB2/PDE3A/CCR6/CEBPA/CABYR/MAP3K13/LHX6/IL15/HOXA5/RB1	28
BP	GO:0062197	cellular response to chemical stress	32/982	337/18723	0.000888594	0.00502668	0.0034923	NCF1/MET/IL18RAP/TLR4/BTK/IL18BP/HMOX1/TNFAIP3/ZFP36L1/SIRPA/JAK2/AIF1/CYP1B1/CD36/ANXA1/FYN/IL10/ATM/FBLN5/SNCA/CAB39/ETS1/KLF2/FER/MMP9/HSF1/TLR6/PPARGC1A/PML/PCGF2/SETX/ATF4	32
BP	GO:0002204	somatic recombination of immunoglobulin genes involved in immune response	9/982	49/18723	0.000893203	0.00502668	0.0034923	PTPRC/TBX21/CD40LG/CD28/PARP3/IL10/FOXP3/CCR6/IL27RA	9
BP	GO:0002208	somatic diversification of immunoglobulins involved in immune response	9/982	49/18723	0.000893203	0.00502668	0.0034923	PTPRC/TBX21/CD40LG/CD28/PARP3/IL10/FOXP3/CCR6/IL27RA	9
BP	GO:0045190	isotype switching	9/982	49/18723	0.000893203	0.00502668	0.0034923	PTPRC/TBX21/CD40LG/CD28/PARP3/IL10/FOXP3/CCR6/IL27RA	9
BP	GO:0050832	defense response to fungus	9/982	49/18723	0.000893203	0.00502668	0.0034923	PLCG2/BCL10/CLEC4E/GNLY/COTL1/SPI1/RARRES2/PLA2G5/S100A8	9
BP	GO:0070741	response to interleukin-6	9/982	49/18723	0.000893203	0.00502668	0.0034923	GFI1/SELPLG/JAK2/PTGIS/PHB/SPI1/FER/CEBPA/PPARGC1A	9
BP	GO:0060491	regulation of cell projection assembly	21/982	188/18723	0.000893296	0.00502668	0.0034923	WAS/PPP1R16B/CCR7/STAP1/EVL/CCL19/CDC42EP1/EPHA2/CDC42EP3/CYLD/CCL21/NRP1/P2RX7/RAC2/DNM3/FER/CCDC88A/RHOG/GPM6A/CDC42EP4/PLEKHM1	21
BP	GO:0035306	positive regulation of dephosphorylation	10/982	59/18723	0.000907236	0.00508895	0.00353556	PTPRC/PPP1R16B/PLEK/LILRB2/ITGA2/IFNG/JAK2/ADORA1/CD300A/CD33	10
BP	GO:0043407	negative regulation of MAP kinase activity	10/982	59/18723	0.000907236	0.00508895	0.00353556	LAX1/APOE/SPRY2/PTPN6/SH2B3/CD300A/PTPN1/DUSP7/PTPN22/IRAK3	10
BP	GO:2000351	regulation of endothelial cell apoptotic process	10/982	59/18723	0.000907236	0.00508895	0.00353556	FASLG/CD40LG/TNFAIP3/TEK/ITGA4/FGA/TNF/PAK4/CCL2/ANGPT1	10
BP	GO:0002828	regulation of type 2 immune response	7/982	31/18723	0.000927437	0.0051913	0.00360667	TBX21/CD86/CCR2/ANXA1/HLX/NOD2/IL27RA	7
BP	GO:0060055	angiogenesis involved in wound healing	7/982	31/18723	0.000927437	0.0051913	0.00360667	CXCR4/TNFAIP3/PRCP/CX3CL1/ETS1/TNF/CD34	7
BP	GO:0010634	positive regulation of epithelial cell migration	20/982	176/18723	0.000946068	0.00528445	0.00367139	MET/PLCG2/PIK3CG/ITGA2/STAT5A/ENPP2/IFNG/HMOX1/PTK2B/PIK3CD/TEK/NRP1/ANXA3/ANXA1/ETS1/MAP3K3/TGFB2/CCR6/MMP9/ANGPT1	20
BP	GO:0043534	blood vessel endothelial cell migration	20/982	176/18723	0.000946068	0.00528445	0.00367139	CARD10/APOE/STAT5A/EPHA2/HMOX1/PTK2B/EFNB2/GADD45A/VASH1/ACVRL1/NRP1/ANXA1/PRCP/ETS1/MAP3K3/TNF/MEOX2/ROBO1/ANGPT1/SH3BP1	20
BP	GO:0034122	negative regulation of toll-like receptor signaling pathway	8/982	40/18723	0.000955404	0.0053224	0.00369775	IRF4/ARRB2/TNFAIP3/LILRA4/CD300A/NOD2/TLR6/IRAK3	8
BP	GO:0071276	cellular response to cadmium ion	8/982	40/18723	0.000955404	0.0053224	0.00369775	NCF1/CYBB/HMOX1/MT1F/MT1E/MMP9/HSF1/MT2A	8
BP	GO:0031338	regulation of vesicle fusion	6/982	23/18723	0.000957871	0.0053224	0.00369775	SLAMF1/CORO1A/ANXA2/ANXA1/SNCA/TBC1D4	6
BP	GO:0032740	positive regulation of interleukin-17 production	6/982	23/18723	0.000957871	0.0053224	0.00369775	LY9/PRKCQ/PHB/IL12B/NOD2/IL15	6
BP	GO:0045932	negative regulation of muscle contraction	6/982	23/18723	0.000957871	0.0053224	0.00369775	PIK3CG/CALCRL/ADORA1/KCNMA1/ADRB2/CALCA	6
BP	GO:0030048	actin filament-based movement	16/982	127/18723	0.000996297	0.00553012	0.00384207	WAS/MYO1F/WIPF1/PDE4B/GJA5/ADORA1/KCNJ5/MYO5A/FGF13/SCN1A/KCNE4/MYO9B/FLNA/PDE4D/GSN/MYL6B	16
BP	GO:0002753	cytoplasmic pattern recognition receptor signaling pathway	10/982	60/18723	0.00103839	0.00575778	0.00400023	TLR4/CYLD/TNFAIP3/SLC15A3/SEC14L1/PHB/MAP2K6/RNF125/NOD2/PTPN22	10
BP	GO:0009299	mRNA transcription	5/982	16/18723	0.00105613	0.00581367	0.00403906	EREG/C5AR1/FLNA/HSF1/ATF4	5
BP	GO:0010819	regulation of T cell chemotaxis	5/982	16/18723	0.00105613	0.00581367	0.00403906	CCL5/CXCL13/CCR2/CXCL10/CCL21	5
BP	GO:0031268	pseudopodium organization	5/982	16/18723	0.00105613	0.00581367	0.00403906	CCR7/CDC42EP1/CDC42EP3/CCL21/CDC42EP4	5
BP	GO:0034116	positive regulation of heterotypic cell-cell adhesion	5/982	16/18723	0.00105613	0.00581367	0.00403906	LCK/IL10/SKAP1/FGA/TNF	5
BP	GO:0051044	positive regulation of membrane protein ectodomain proteolysis	5/982	16/18723	0.00105613	0.00581367	0.00403906	TNFRSF1B/APOE/IFNG/ADAM8/TNF	5
BP	GO:0070431	nucleotide-binding oligomerization domain containing 2 signaling pathway	5/982	16/18723	0.00105613	0.00581367	0.00403906	TLR4/TNFAIP3/SLC15A3/NOD2/PTPN22	5
BP	GO:0097284	hepatocyte apoptotic process	5/982	16/18723	0.00105613	0.00581367	0.00403906	PIK3CG/STK4/BCL2L1/GSN/RB1	5
BP	GO:0035303	regulation of dephosphorylation	16/982	128/18723	0.00108448	0.00596353	0.00414318	PTPRC/PPP1R16B/NCKAP1L/PLEK/LILRB2/ITGA2/SEMA4D/IFNG/JAK2/ADORA1/CD300A/LGALS3/TNF/TGFB2/CD33/HSP90B1	16
BP	GO:0003281	ventricular septum development	11/982	71/18723	0.00111129	0.00610461	0.00424119	PRDM1/ACVR1/HEG1/SLIT3/GJA5/TGFB2/CNTRL/TGFBR3/ROBO1/LUZP1/SOX4	11
BP	GO:0046889	positive regulation of lipid biosynthetic process	12/982	82/18723	0.0011282	0.00619111	0.00430129	RAB38/NR1H3/APOE/ABCD2/CAPN2/IFNG/BMP6/ANXA1/TNF/ABCG1/PPARGC1A/CREBL2	12
BP	GO:0071634	regulation of transforming growth factor beta production	8/982	41/18723	0.00113323	0.00621028	0.00431461	LILRB1/CD200/TYROBP/CDH3/CX3CL1/FOXP3/TGFB2/CD34	8
BP	GO:0019835	cytolysis	7/982	32/18723	0.00113403	0.00621028	0.00431461	GZMA/PRF1/GZMB/GZMH/CR1/LYZ/C7	7
BP	GO:0030865	cortical cytoskeleton organization	10/982	61/18723	0.00118466	0.00648087	0.0045026	NCKAP1L/RHOH/PLEK/LCP1/EPB41L3/FMNL1/RAC2/TNF/RHOG/EPB41L2	10
BP	GO:0034764	positive regulation of transmembrane transport	23/982	219/18723	0.0012171	0.00664998	0.00462009	PLCG2/P2RX1/CTSS/KCNN4/CXCL9/CCR2/IFNG/CXCL10/STAC/P2RX7/SNCA/C3/CX3CL1/PTAFR/IFNGR2/FXYD1/ANK3/CXCL11/FLNA/ADRB2/CREBL2/CCL2/RGS9	23
BP	GO:0051043	regulation of membrane protein ectodomain proteolysis	6/982	24/18723	0.00122105	0.00664998	0.00462009	TNFRSF1B/APOE/IFNG/ADAM8/IL10/TNF	6
BP	GO:0002765	immune response-inhibiting signal transduction	4/982	10/18723	0.00122434	0.00664998	0.00462009	LILRB1/LILRB2/LILRB4/CD33	4
BP	GO:0042368	vitamin D biosynthetic process	4/982	10/18723	0.00122434	0.00664998	0.00462009	GFI1/IFNG/TNF/CYP27A1	4
BP	GO:0045625	regulation of T-helper 1 cell differentiation	4/982	10/18723	0.00122434	0.00664998	0.00462009	CCL19/ANXA1/JAK3/HLX	4
BP	GO:0070099	regulation of chemokine-mediated signaling pathway	4/982	10/18723	0.00122434	0.00664998	0.00462009	CCL5/SH2B3/SLIT3/ROBO1	4
BP	GO:1905383	protein localization to presynapse	4/982	10/18723	0.00122434	0.00664998	0.00462009	RAB27B/DLG2/DVL1/KIF5C	4
BP	GO:0031960	response to corticosteroid	19/982	167/18723	0.001236	0.00669961	0.00465457	CYBB/BMP6/FLT3/ZFP36L1/SLIT3/AIF1/ANXA3/ANXA1/IL10/HNMT/PAM/PTAFR/CDO1/CLDN1/TNF/CPS1/CNGA3/FECH/ALPL	19
BP	GO:1903034	regulation of response to wounding	19/982	167/18723	0.001236	0.00669961	0.00465457	CXCR4/APOE/TNFAIP3/SERPING1/PLAT/SH2B3/ANXA2/CD36/ANXA1/IL10/PLAU/FGA/CLDN1/TNF/FLNA/CD34/LRP1/C1QTNF1/TFPI	19
BP	GO:0007009	plasma membrane organization	17/982	142/18723	0.0012505	0.00675871	0.00469563	PTPRC/BIN2/CXCR4/CR1/FASLG/ABCD2/EPB41L3/ANXA6/MYOF/SYT11/P2RX7/ATP10A/TIE1/ANK3/CAV2/TGFB2/GSN	17
BP	GO:0002534	cytokine production involved in inflammatory response	11/982	72/18723	0.00125072	0.00675871	0.00469563	CD6/TLR4/LILRB4/ABCD2/SIRPA/GPSM3/MEFV/TNF/IL17RA/NOD2/TLR6	11
BP	GO:1900015	regulation of cytokine production involved in inflammatory response	11/982	72/18723	0.00125072	0.00675871	0.00469563	CD6/TLR4/LILRB4/ABCD2/SIRPA/GPSM3/MEFV/TNF/IL17RA/NOD2/TLR6	11
BP	GO:0006906	vesicle fusion	14/982	106/18723	0.0012738	0.0068742	0.00477587	SLAMF1/CORO1A/STX11/ANXA2/ANXA1/SYT11/SNCA/RAB8B/CAV2/UVRAG/YIPF5/TBC1D4/PLEKHM1/PLA2G5	14
BP	GO:0072001	renal system development	29/982	302/18723	0.00127468	0.0068742	0.00477587	PECAM1/PRDM1/BMP6/HPGD/TEK/FOXF1/NRP1/C1GALT1/STAT1/TCF21/ARID5B/ADAMTS1/EPCAM/TRAF3IP2/DCN/TGFB2/ITGA8/CD34/TIPARP/MMP9/CAT/JAG1/CXCR2/ACE/CNTRL/NLE1/IQGAP1/ANGPT1/SOX4	29
BP	GO:0009308	amine metabolic process	15/982	118/18723	0.00129077	0.00695394	0.00483127	SLC7A7/KMO/HAAO/IDO1/TDO2/SNCA/HNMT/LY6E/VCAM1/MOXD1/ITGB2/TGFB2/NAAA/AOC3/HDC	15
BP	GO:0043507	positive regulation of JUN kinase activity	8/982	42/18723	0.00133648	0.00718563	0.00499224	CCL19/PTK2B/FGD2/SYK/PTPN1/TNF/TLR6/MAP3K13	8
BP	GO:1904037	positive regulation of epithelial cell apoptotic process	8/982	42/18723	0.00133648	0.00718563	0.00499224	FASLG/ARRB2/CD40LG/ITGA4/JAK2/PPARGC1A/CCL2/GSN	8
BP	GO:0034110	regulation of homotypic cell-cell adhesion	7/982	33/18723	0.00137504	0.00738269	0.00512915	CCL5/PRKCQ/SH2B3/SYK/JAK2/ANK3/C1QTNF1	7
BP	GO:0010876	lipid localization	39/982	448/18723	0.00137592	0.00738269	0.00512915	PLA2G2D/NR1H3/KCNN4/APOE/FASLG/APOL3/ABCD2/GM2A/BMP6/SLCO2B1/APOC1/SYK/PSAP/ANXA2/CD36/ANXA1/APOL6/AKR1C1/P2RX7/C3/MAP2K6/ATP10A/AQP9/PLIN3/ABCA8/ABCA1/PLA2G4C/TNF/FABP4/ABCA6/ABCG1/MSR1/OSBPL11/LRP1/ACE/C1QTNF1/SCARB2/PLA2G5/NRIP1	39
BP	GO:0006970	response to osmotic stress	12/982	84/18723	0.00139821	0.00749477	0.00520701	ITGA2/KMO/PTK2B/ZFP36L1/HNMT/CAB39/AQP9/KCNMA1/CLDN1/TNF/MAP7/TSC22D2	12
BP	GO:0042058	regulation of epidermal growth factor receptor signaling pathway	11/982	73/18723	0.00140421	0.0075193	0.00522405	NCF1/FASLG/EREG/BCAR3/ADORA1/PTPN12/FER/CCDC88A/MMP9/HIP1/MVP	11
BP	GO:0003184	pulmonary valve morphogenesis	5/982	17/18723	0.00143205	0.00761468	0.00529032	GJA5/NFATC1/TGFB2/JAG1/ROBO1	5
BP	GO:0016045	detection of bacterium	5/982	17/18723	0.00143205	0.00761468	0.00529032	CD1D/TLR1/NAIP/NOD2/TLR6	5
BP	GO:0019885	antigen processing and presentation of endogenous peptide antigen via MHC class I	5/982	17/18723	0.00143205	0.00761468	0.00529032	HLA-E/B2M/TAP1/HLA-F/TAP2	5
BP	GO:0035855	megakaryocyte development	5/982	17/18723	0.00143205	0.00761468	0.00529032	FLI1/PTPN6/SH2B3/MEIS1/THPO	5
BP	GO:0036035	osteoclast development	5/982	17/18723	0.00143205	0.00761468	0.00529032	LILRB1/ANXA2/TYROBP/CLDN18/LRRK1	5
BP	GO:0043117	positive regulation of vascular permeability	5/982	17/18723	0.00143205	0.00761468	0.00529032	APOE/BMP6/PDE3A/CXCR2/ANGPT1	5
BP	GO:0090713	immunological memory process	5/982	17/18723	0.00143205	0.00761468	0.00529032	FGL2/IL12RB1/TNFRSF14/IL12B/HLA-DRA	5
BP	GO:0033135	regulation of peptidyl-serine phosphorylation	17/982	144/18723	0.0014595	0.00775285	0.00538631	HCLS1/RASSF2/PLCL2/ARRB2/IFNG/STK4/SPRY2/TCL1A/GADD45A/BCAR3/SNCA/TNF/APP/PLCL1/CREBL2/PDE4D/ANGPT1	17
BP	GO:0042176	regulation of protein catabolic process	35/982	391/18723	0.00147998	0.00785379	0.00545644	TNFRSF1B/PYHIN1/PTTG1IP/LAPTM5/APOE/IFNG/MYCBP2/PTK2B/LAMP3/TNFAIP3/CBFA2T3/ANXA2/ADAM8/SMURF2/PHB/FYN/IL10/SNCA/USP25/TNF/CDKN1B/AGTPBP1/CEBPA/FLNA/TIPARP/GNA12/SDCBP/LRP1/CSNK1A1/DVL1/IRAK3/PML/NEDD4/PIAS1/AGAP2	35
BP	GO:0099601	regulation of neurotransmitter receptor activity	10/982	63/18723	0.00152767	0.00809876	0.00562664	CCR2/IFNG/PTK2B/IFNGR2/APP/PPARGC1A/ADRB2/CCL2/RGS9/CRHBP	10
BP	GO:0033622	integrin activation	6/982	25/18723	0.00153613	0.00811126	0.00563532	PLEK/CXCL13/CXCL12/PTGER4/SKAP1/CX3CL1	6
BP	GO:0090382	phagosome maturation	6/982	25/18723	0.00153613	0.00811126	0.00563532	CORO1A/RAB38/SLAMF8/SYT11/MCOLN1/PLA2G5	6
BP	GO:1902932	positive regulation of alcohol biosynthetic process	6/982	25/18723	0.00153613	0.00811126	0.00563532	BMP6/CD244/HRH1/SNCA/PTAFR/ABCG1	6
BP	GO:2000316	regulation of T-helper 17 type immune response	6/982	25/18723	0.00153613	0.00811126	0.00563532	PRKCQ/TBX21/IL12RB1/IL12B/FOXP3/IL27RA	6
BP	GO:0097006	regulation of plasma lipoprotein particle levels	12/982	85/18723	0.00155201	0.00818697	0.00568792	PLA2G7/APOE/HMOX1/APOC1/ANXA2/CD36/LIPA/ABCA1/CSK/ABCG1/MSR1/PLA2G5	12
BP	GO:0034142	toll-like receptor 4 signaling pathway	8/982	43/18723	0.00156767	0.0082532	0.00573393	TLR4/NR1H3/TNFAIP3/CD14/TNIP3/LY96/TRIL/PTPN22	8
BP	GO:0071604	transforming growth factor beta production	8/982	43/18723	0.00156767	0.0082532	0.00573393	LILRB1/CD200/TYROBP/CDH3/CX3CL1/FOXP3/TGFB2/CD34	8
BP	GO:0048844	artery morphogenesis	11/982	74/18723	0.0015728	0.00827199	0.00574699	PRDM1/APOE/HPGD/FOXF1/ACVRL1/GJA5/NRP1/TGFB2/JAG1/LRP1/SOX4	11
BP	GO:0043113	receptor clustering	9/982	53/18723	0.00159751	0.00838536	0.00582575	ITGAL/ITGB7/APOE/ITGA4/ITGB2/FLNA/DLG2/DVL1/GSN	9
BP	GO:0045744	negative regulation of G protein-coupled receptor signaling pathway	9/982	53/18723	0.00159751	0.00838536	0.00582575	MET/CCL5/PDE4B/PLEK/ARRB2/SNCA/RGS13/ADRB2/KLK14	9
BP	GO:0014909	smooth muscle cell migration	13/982	97/18723	0.00163717	0.00858391	0.00596369	CCL5/TLR4/ITGA2/PLAT/AIF1/NRP1/PLAU/ADAMTS1/GNA12/LRP1/ACE/PPARGC1A/IQGAP1	13
BP	GO:0001503	ossification	36/982	408/18723	0.00163857	0.00858391	0.00596369	RASSF2/S1PR1/RUNX3/ACVR1/FGR/SEMA4D/CCR1/TNC/BMP6/EPHA2/GPNMB/PTK2B/TEK/SRGN/SNX10/PTGER4/PHB/CHRDL1/P2RX7/MAP2K6/TUFT1/TNF/EGR2/TGFB2/CEBPA/LRP5/MMP9/CAT/JAG1/ADRB2/FASN/BCAP29/ALPL/CALCA/BMP2K/ATF4	36
BP	GO:0001822	kidney development	28/982	293/18723	0.00164549	0.00861167	0.00598298	PECAM1/PRDM1/BMP6/HPGD/TEK/NRP1/C1GALT1/STAT1/TCF21/ARID5B/ADAMTS1/EPCAM/TRAF3IP2/DCN/TGFB2/ITGA8/CD34/TIPARP/MMP9/CAT/JAG1/CXCR2/ACE/CNTRL/NLE1/IQGAP1/ANGPT1/SOX4	28
BP	GO:0010922	positive regulation of phosphatase activity	7/982	34/18723	0.00165423	0.00864041	0.00600295	PTPRC/PLEK/ITGA2/IFNG/JAK2/CD300A/CD33	7
BP	GO:0051482	positive regulation of cytosolic calcium ion concentration involved in phospholipase C-activating G protein-coupled signaling pathway	7/982	34/18723	0.00165423	0.00864041	0.00600295	GPR18/GPR65/P2RY10/S1PR1/LPAR6/C3AR1/CALCA	7
BP	GO:0038127	ERBB signaling pathway	15/982	121/18723	0.00166593	0.00869296	0.00603945	NCF1/RASSF2/FASLG/EREG/PTK2B/BCAR3/ADORA1/GRB2/PTPN12/FER/CCDC88A/MMP9/HIP1/IQGAP1/MVP	15
BP	GO:0035023	regulation of Rho protein signal transduction	12/982	86/18723	0.00171948	0.00896354	0.00622745	MET/GPR18/GPR65/P2RY10/APOE/HEG1/LPAR6/NRP1/ABCA1/STARD8/MYO9B/ROBO1	12
BP	GO:0070542	response to fatty acid	10/982	64/18723	0.00172712	0.00899457	0.006249	TBXAS1/CD36/AKR1C1/PTAFR/GLDC/CLDN1/INSIG2/CAT/CPS1/PPARGC1A	10
BP	GO:0048662	negative regulation of smooth muscle cell proliferation	11/982	75/18723	0.00175759	0.00914427	0.00635301	APOE/IFNG/HMOX1/TNFAIP3/AIF1/IL10/IL12B/CDKN1B/GNA12/PPARGC1A/IL15	11
BP	GO:0008277	regulation of G protein-coupled receptor signaling pathway	16/982	134/18723	0.00176414	0.0091604	0.00636422	MET/CCL5/PDE4B/PLEK/ARRB2/PHB/SNCA/RGS1/C3/GNG7/MGLL/GIT2/RGS13/ADRB2/RGS9/KLK14	16
BP	GO:0061041	regulation of wound healing	16/982	134/18723	0.00176414	0.0091604	0.00636422	CXCR4/APOE/TNFAIP3/SERPING1/PLAT/SH2B3/ANXA2/CD36/ANXA1/PLAU/FGA/CLDN1/TNF/CD34/C1QTNF1/TFPI	16
BP	GO:0070301	cellular response to hydrogen peroxide	13/982	98/18723	0.001799	0.00933233	0.00648366	MET/IL18RAP/IL18BP/TNFAIP3/SIRPA/CYP1B1/ANXA1/IL10/ETS1/KLF2/HSF1/PCGF2/SETX	13
BP	GO:0048259	regulation of receptor-mediated endocytosis	14/982	110/18723	0.00182485	0.00943888	0.00655769	PLCG2/CCL19/ARRB2/APOC1/B2M/SYK/ANXA2/CCL21/SYT11/C3/SDCBP/HIP1/ANGPT1/BMP2K	14
BP	GO:0090174	organelle membrane fusion	14/982	110/18723	0.00182485	0.00943888	0.00655769	SLAMF1/CORO1A/STX11/ANXA2/ANXA1/SYT11/SNCA/RAB8B/CAV2/UVRAG/YIPF5/TBC1D4/PLEKHM1/PLA2G5	14
BP	GO:0042554	superoxide anion generation	8/982	44/18723	0.00182942	0.00943888	0.00655769	NCF1/CYBB/ACP5/NCF4/SYK/TYROBP/ITGB2/FPR2	8
BP	GO:0001867	complement activation, lectin pathway	4/982	11/18723	0.00184442	0.00943888	0.00655769	SERPING1/A2M/FCN1/MFAP4	4
BP	GO:0002924	negative regulation of humoral immune response mediated by circulating immunoglobulin	4/982	11/18723	0.00184442	0.00943888	0.00655769	CR1/FCGR2B/PTPN6/CR2	4
BP	GO:0006568	tryptophan metabolic process	4/982	11/18723	0.00184442	0.00943888	0.00655769	KMO/HAAO/IDO1/TDO2	4
BP	GO:0032493	response to bacterial lipoprotein	4/982	11/18723	0.00184442	0.00943888	0.00655769	CD14/TLR1/CD36/TLR6	4
BP	GO:0032957	inositol trisphosphate metabolic process	4/982	11/18723	0.00184442	0.00943888	0.00655769	PLCG2/PTK2B/HRH1/PTAFR	4
BP	GO:0035865	cellular response to potassium ion	4/982	11/18723	0.00184442	0.00943888	0.00655769	HSF1/PPARGC1A/DLG2/CRHBP	4
BP	GO:0098883	synapse pruning	4/982	11/18723	0.00184442	0.00943888	0.00655769	C1QA/C1QB/C3/CX3CL1	4
BP	GO:1900227	positive regulation of NLRP3 inflammasome complex assembly	4/982	11/18723	0.00184442	0.00943888	0.00655769	TLR4/PLCG2/CD36/TLR6	4
BP	GO:1903238	positive regulation of leukocyte tethering or rolling	4/982	11/18723	0.00184442	0.00943888	0.00655769	CCR2/ITGA4/PTAFR/FUT7	4
BP	GO:1905522	negative regulation of macrophage migration	4/982	11/18723	0.00184442	0.00943888	0.00655769	STAP1/SLAMF8/CD200/MMP28	4
BP	GO:2000644	regulation of receptor catabolic process	4/982	11/18723	0.00184442	0.00943888	0.00655769	LAPTM5/APOE/ANXA2/PTPN1	4
BP	GO:0002223	stimulatory C-type lectin receptor signaling pathway	5/982	18/18723	0.00189796	0.00967561	0.00672215	PLCG2/KLRD1/SYK/FYN/TYROBP	5
BP	GO:0045623	negative regulation of T-helper cell differentiation	5/982	18/18723	0.00189796	0.00967561	0.00672215	TBX21/ANXA1/JAK3/HLX/FOXP3	5
BP	GO:1990840	response to lectin	5/982	18/18723	0.00189796	0.00967561	0.00672215	PLCG2/KLRD1/SYK/FYN/TYROBP	5
BP	GO:1990858	cellular response to lectin	5/982	18/18723	0.00189796	0.00967561	0.00672215	PLCG2/KLRD1/SYK/FYN/TYROBP	5
BP	GO:0010875	positive regulation of cholesterol efflux	6/982	26/18723	0.00190943	0.00968756	0.00673046	NR1H3/APOE/ABCA8/ABCA1/ABCG1/LRP1	6
BP	GO:0032682	negative regulation of chemokine production	6/982	26/18723	0.00190943	0.00968756	0.00673046	LILRB4/EPHA2/SIRPA/IL10/MEFV/MUL1	6
BP	GO:0046639	negative regulation of alpha-beta T cell differentiation	6/982	26/18723	0.00190943	0.00968756	0.00673046	RUNX3/TBX21/ANXA1/JAK3/HLX/FOXP3	6
BP	GO:0097066	response to thyroid hormone	6/982	26/18723	0.00190943	0.00968756	0.00673046	CTSS/LMO2/ANXA2/CAB39/CTSB/PPARGC1A	6
BP	GO:2000108	positive regulation of leukocyte apoptotic process	6/982	26/18723	0.00190943	0.00968756	0.00673046	CCL5/PIK3CD/IDO1/ANXA1/ADAM8/IL10	6
BP	GO:0007568	aging	31/982	339/18723	0.00192966	0.00978085	0.00679527	TNFRSF1B/INPP5D/KMO/C1QA/SERPING1/B2M/VASH1/PPP3CA/EDNRB/GRB2/IL10/ATM/SNCA/CX3CL1/MAP2K6/VCAM1/BCL2A1/MAP3K3/SPI1/CLDN1/CDKN1B/DCN/APP/CAT/LRP1/PPARGC1A/CCL11/IL15/LITAF/PML/CALCA	31
BP	GO:0003231	cardiac ventricle development	15/982	123/18723	0.0019635	0.00994292	0.00690787	PRDM1/ACVR1/SEMA3C/HEG1/FOXF1/SLIT3/GJA5/LY6E/TGFB2/JAG1/CNTRL/TGFBR3/ROBO1/LUZP1/SOX4	15
BP	GO:0051384	response to glucocorticoid	17/982	148/18723	0.00196674	0.00994985	0.00691269	BMP6/FLT3/ZFP36L1/SLIT3/AIF1/ANXA3/ANXA1/IL10/HNMT/PAM/PTAFR/CDO1/CLDN1/TNF/CPS1/FECH/ALPL	17
BP	GO:0001938	positive regulation of endothelial cell proliferation	14/982	111/18723	0.00198987	0.0100573	0.00698731	PPP1R16B/STAT5A/BMP6/HMOX1/PIK3CD/TEK/CXCL12/ITGA4/ACVRL1/NRP1/IL10/WNT2/CAV2/CCL11	14
BP	GO:0061098	positive regulation of protein tyrosine kinase activity	9/982	55/18723	0.0020875	0.0105407	0.00732315	NCF1/CCL5/STAP1/EREG/ADORA1/CSF1R/PTPN1/ACE/FCGR1A	9
BP	GO:0072659	protein localization to plasma membrane	27/982	284/18723	0.00212361	0.0107069	0.00743866	EPB41L3/IFNG/EPHA2/PRKCH/TSPAN32/ANXA2/PKP3/STAC/GBP1/S100A10/LGALS3/SKAP1/MYO5A/FGF13/ANK3/RAB8B/TNF/OPTN/MAP7/CCDC88A/BCL2L1/CSK/FLNA/EFR3A/RAB40C/RHOG/LRP1	27
BP	GO:0022602	ovulation cycle process	8/982	45/18723	0.00212445	0.0107069	0.00743866	EREG/ARRB2/SLIT3/PAM/MAP2K6/ADAMTS1/TGFB2/NRIP1	8
BP	GO:0002200	somatic diversification of immune receptors	11/982	77/18723	0.00218032	0.010978	0.00762703	PTPRC/BCL11B/TBX21/SAMHD1/CD40LG/CD28/PARP3/IL10/FOXP3/CCR6/IL27RA	11
BP	GO:0002562	somatic diversification of immune receptors via germline recombination within a single locus	10/982	66/18723	0.00218918	0.0110018	0.00764354	PTPRC/BCL11B/TBX21/CD40LG/CD28/PARP3/IL10/FOXP3/CCR6/IL27RA	10
BP	GO:0016444	somatic cell DNA recombination	10/982	66/18723	0.00218918	0.0110018	0.00764354	PTPRC/BCL11B/TBX21/CD40LG/CD28/PARP3/IL10/FOXP3/CCR6/IL27RA	10
BP	GO:0030879	mammary gland development	16/982	137/18723	0.00221968	0.011134	0.00773541	ITGA2/STAT5A/EPHA2/FOXF1/JAK2/CSF1R/PAM/CDO1/WNT2/LRP5/CCL11/FASN/HOXA5/PML/ROBO1/LBH	16
BP	GO:0050714	positive regulation of protein secretion	16/982	137/18723	0.00221968	0.011134	0.00773541	TLR4/KCNN4/BMP6/JAK2/FRMD4A/ADAM8/CAMK2N1/FGA/ANO1/TGFB2/WLS/CD33/ABCG1/LRP1/GLUL/SOX4	16
BP	GO:0006979	response to oxidative stress	38/982	446/18723	0.00229707	0.0115114	0.00799755	NCF1/MET/IL18RAP/TLR4/BTK/APOE/CAPN2/IL18BP/HMOX1/PTK2B/TNFAIP3/SIRPA/JAK2/AIF1/CYP1B1/CD36/ANXA1/FYN/STAT1/IL10/FBLN5/SNCA/ETS1/THG1L/KLF2/APP/FER/MMP9/CAT/HSF1/TLR6/PPARGC1A/PML/PCGF2/CA3/SETX/ATF4/SESN1	38
BP	GO:0014910	regulation of smooth muscle cell migration	12/982	89/18723	0.00231304	0.0115804	0.00804555	CCL5/TLR4/ITGA2/AIF1/NRP1/PLAU/ADAMTS1/GNA12/LRP1/ACE/PPARGC1A/IQGAP1	12
BP	GO:0045191	regulation of isotype switching	7/982	36/18723	0.00234316	0.0116868	0.00811942	PTPRC/TBX21/CD28/PARP3/IL10/FOXP3/IL27RA	7
BP	GO:0070670	response to interleukin-4	7/982	36/18723	0.00234316	0.0116868	0.00811942	IL2RG/CORO1A/IL24/JAK3/CCL11/FASN/PML	7
BP	GO:0042402	cellular biogenic amine catabolic process	6/982	27/18723	0.00234748	0.0116868	0.00811942	KMO/HAAO/IDO1/TDO2/HNMT/MOXD1	6
BP	GO:0060142	regulation of syncytium formation by plasma membrane fusion	6/982	27/18723	0.00234748	0.0116868	0.00811942	CD53/CXCL9/CAPN2/PLEKHO1/CXCL10/TYROBP	6
BP	GO:0061437	renal system vasculature development	6/982	27/18723	0.00234748	0.0116868	0.00811942	PECAM1/TEK/NRP1/TCF21/CD34/ANGPT1	6
BP	GO:0061440	kidney vasculature development	6/982	27/18723	0.00234748	0.0116868	0.00811942	PECAM1/TEK/NRP1/TCF21/CD34/ANGPT1	6
BP	GO:0051058	negative regulation of small GTPase mediated signal transduction	9/982	56/18723	0.00237375	0.0118065	0.0082026	ARHGAP25/MET/RASA1/SPRY2/HEG1/TGFB2/RASA3/STMN3/SH3BP1	9
BP	GO:0061045	negative regulation of wound healing	11/982	78/18723	0.00242066	0.0120173	0.00834907	APOE/SERPING1/PLAT/SH2B3/ANXA2/PLAU/FGA/TNF/CD34/C1QTNF1/TFPI	11
BP	GO:0070373	negative regulation of ERK1 and ERK2 cascade	11/982	78/18723	0.00242066	0.0120173	0.00834907	PTPRC/TLR4/DUSP6/SPRY2/SIRPA/GBP1/PHB/FBLN1/CAMK2N1/PTPN1/CSK	11
BP	GO:0043535	regulation of blood vessel endothelial cell migration	17/982	151/18723	0.0024377	0.0120794	0.00839217	CARD10/APOE/STAT5A/EPHA2/HMOX1/GADD45A/VASH1/ACVRL1/NRP1/ANXA1/PRCP/ETS1/MAP3K3/TNF/MEOX2/ANGPT1/SH3BP1	17
BP	GO:2001236	regulation of extrinsic apoptotic signaling pathway	17/982	151/18723	0.0024377	0.0120794	0.00839217	PTPRC/ACVR1/BCL10/STK4/HMOX1/CYLD/TNFAIP3/CSF2/NRP1/FYN/LGALS3/G0S2/CX3CL1/FGA/TNF/BCL2L1/PML	17
BP	GO:0016445	somatic diversification of immunoglobulins	10/982	67/18723	0.00245485	0.0121052	0.00841011	PTPRC/TBX21/SAMHD1/CD40LG/CD28/PARP3/IL10/FOXP3/CCR6/IL27RA	10
BP	GO:0010744	positive regulation of macrophage derived foam cell differentiation	5/982	19/18723	0.0024657	0.0121052	0.00841011	PRKCH/CSF2/CD36/MSR1/PLA2G5	5
BP	GO:0010885	regulation of cholesterol storage	5/982	19/18723	0.0024657	0.0121052	0.00841011	NR1H3/CD36/ABCA1/ABCG1/MSR1	5
BP	GO:0032026	response to magnesium ion	5/982	19/18723	0.0024657	0.0121052	0.00841011	BMP6/CD14/SNCA/ANK3/CNGA3	5
BP	GO:0045019	negative regulation of nitric oxide biosynthetic process	5/982	19/18723	0.0024657	0.0121052	0.00841011	ACP5/SIRPA/PTGIS/IL10/CD34	5
BP	GO:0070233	negative regulation of T cell apoptotic process	5/982	19/18723	0.0024657	0.0121052	0.00841011	CCL5/CD27/PRKCQ/IL7R/JAK3	5
BP	GO:1901739	regulation of myoblast fusion	5/982	19/18723	0.0024657	0.0121052	0.00841011	CD53/CXCL9/CAPN2/PLEKHO1/CXCL10	5
BP	GO:1903978	regulation of microglial cell activation	5/982	19/18723	0.0024657	0.0121052	0.00841011	PTPRC/STAP1/CST7/SYT11/CX3CL1	5
BP	GO:1904406	negative regulation of nitric oxide metabolic process	5/982	19/18723	0.0024657	0.0121052	0.00841011	ACP5/SIRPA/PTGIS/IL10/CD34	5
BP	GO:2000251	positive regulation of actin cytoskeleton reorganization	5/982	19/18723	0.0024657	0.0121052	0.00841011	HCLS1/STAP1/TEK/HCK/NRP1	5
BP	GO:0010522	regulation of calcium ion transport into cytosol	13/982	102/18723	0.00258409	0.0126564	0.00879304	CORO1A/P2RX1/CXCL9/PTPN6/PTK2B/CXCL10/FYN/P2RX7/SNCA/CX3CL1/CXCL11/PDE4D/PML	13
BP	GO:0071214	cellular response to abiotic stimulus	30/982	331/18723	0.00258512	0.0126564	0.00879304	TLR4/TLR8/ITGA2/BCL10/BMP6/IRF1/ZFP36L1/TLR7/CCND2/GADD45A/TNFRSF8/TNFSF14/CASP1/PTGER4/GRB2/MAP3K14/ATM/PIEZO2/PTAFR/CAB39/BLM/MFAP4/BCL2L1/MCOLN1/MMP9/HSF1/RGS9/NEDD4/CASP5/ATF4	30
BP	GO:0104004	cellular response to environmental stimulus	30/982	331/18723	0.00258512	0.0126564	0.00879304	TLR4/TLR8/ITGA2/BCL10/BMP6/IRF1/ZFP36L1/TLR7/CCND2/GADD45A/TNFRSF8/TNFSF14/CASP1/PTGER4/GRB2/MAP3K14/ATM/PIEZO2/PTAFR/CAB39/BLM/MFAP4/BCL2L1/MCOLN1/MMP9/HSF1/RGS9/NEDD4/CASP5/ATF4	30
BP	GO:0009266	response to temperature stimulus	19/982	178/18723	0.00259301	0.0126833	0.00881177	TFEC/CXCR4/ARRB2/HMOX1/LXN/CXCL12/CD14/TRPV2/CXCL10/STAC/ADORA1/ATM/ANO1/ST8SIA1/CD34/HSF1/PPARGC1A/ADRB2/CALCA	19
BP	GO:0032823	regulation of natural killer cell differentiation	4/982	12/18723	0.00265247	0.0129384	0.00898899	PRDM1/RASGRP1/IL15RA/IL15	4
BP	GO:0043380	regulation of memory T cell differentiation	4/982	12/18723	0.00265247	0.0129384	0.00898899	FGL2/IL12RB1/IL12B/HLA-DRA	4
BP	GO:0072683	T cell extravasation	4/982	12/18723	0.00265247	0.0129384	0.00898899	ITGAL/CCR2/IL27RA/CCL2	4
BP	GO:0034329	cell junction assembly	36/982	420/18723	0.00267355	0.0130293	0.00905211	AMIGO2/PECAM1/ITGA2/SEMA4D/EPB41L3/EPHA2/IL1RAP/PRKCH/PTK2B/EFNB2/HEG1/TEK/ACVRL1/GJA5/PKP3/NRP1/S100A10/SNCA/FGF13/DST/DNM3/CLDN1/TNF/APP/CTNND2/SDCBP/LRP1/ACE/NPTN/DVL1/GPM6A/GPC4/IQGAP1/LRRN3/CLDN18/SH3BP1	36
BP	GO:1901184	regulation of ERBB signaling pathway	11/982	79/18723	0.00268199	0.0130584	0.00907236	NCF1/FASLG/EREG/BCAR3/ADORA1/PTPN12/FER/CCDC88A/MMP9/HIP1/MVP	11
BP	GO:0010883	regulation of lipid storage	9/982	57/18723	0.0026903	0.0130749	0.00908382	NR1H3/CD36/C3/PLIN3/ABCA1/TNF/ABCG1/MSR1/OSBPL11	9
BP	GO:0016447	somatic recombination of immunoglobulin gene segments	9/982	57/18723	0.0026903	0.0130749	0.00908382	PTPRC/TBX21/CD40LG/CD28/PARP3/IL10/FOXP3/CCR6/IL27RA	9
BP	GO:0060411	cardiac septum morphogenesis	10/982	68/18723	0.00274576	0.0133323	0.00926262	ACVR1/SEMA3C/SLIT3/NRP1/TGFB2/MKS1/JAG1/TGFBR3/ROBO1/SOX4	10
BP	GO:0003176	aortic valve development	7/982	37/18723	0.00276125	0.013383	0.00929787	TNFRSF1B/SLIT3/TIE1/NFATC1/JAG1/ROBO1/RB1	7
BP	GO:0043029	T cell homeostasis	7/982	37/18723	0.00276125	0.013383	0.00929787	NCKAP1L/CORO1A/SIT1/TNFSF14/JAK3/FOXP3/IL2RA	7
BP	GO:0046165	alcohol biosynthetic process	16/982	140/18723	0.00276927	0.0134096	0.00931638	PLEK/PLCG2/GFI1/APOE/BMP6/PTK2B/CD244/HRH1/SNCA/PTAFR/MOXD1/INSIG2/CYP27A1/ABCG1/SPTLC1/CLCN2	16
BP	GO:0009135	purine nucleoside diphosphate metabolic process	13/982	103/18723	0.00281888	0.013625	0.00946602	NT5E/SLC2A6/IFNG/CBFA2T3/MPP1/P2RX7/ADPGK/BPGM/APP/HK3/PPARGC1A/DLG2/PGM1	13
BP	GO:0009179	purine ribonucleoside diphosphate metabolic process	13/982	103/18723	0.00281888	0.013625	0.00946602	NT5E/SLC2A6/IFNG/CBFA2T3/MPP1/P2RX7/ADPGK/BPGM/APP/HK3/PPARGC1A/DLG2/PGM1	13
BP	GO:0014911	positive regulation of smooth muscle cell migration	8/982	47/18723	0.00282585	0.0136463	0.00948078	CCL5/TLR4/ITGA2/AIF1/NRP1/ADAMTS1/LRP1/IQGAP1	8
BP	GO:0010575	positive regulation of vascular endothelial growth factor production	6/982	28/18723	0.00285702	0.0137593	0.00955929	CYP1B1/C5AR1/C3/C3AR1/RORA/ATF4	6
BP	GO:0032801	receptor catabolic process	6/982	28/18723	0.00285702	0.0137593	0.00955929	LAPTM5/APOE/ANXA2/PTPN1/UVRAG/NEDD4	6
BP	GO:0071280	cellular response to copper ion	6/982	28/18723	0.00285702	0.0137593	0.00955929	SNCA/MT1F/MT1E/APP/HSF1/MT2A	6
BP	GO:1903829	positive regulation of cellular protein localization	26/982	276/18723	0.00287857	0.0138505	0.00962269	CD247/HCLS1/PYHIN1/GZMB/CARD10/IFNG/EPHA2/PRKCH/JAK2/STAC/FYN/SYT11/GPR137B/TYROBP/LGALS3/RAC2/ANK3/ITGB2/TNF/CCDC88A/FLNA/RHOG/LRP1/NPTN/EPB41L2/IQGAP1	26
BP	GO:0048284	organelle fusion	16/982	141/18723	0.00297578	0.0143053	0.00993865	SLAMF1/CORO1A/STX11/ANXA2/ANXA1/SYT11/SNCA/THG1L/RAB8B/CAV2/MUL1/UVRAG/YIPF5/TBC1D4/PLEKHM1/PLA2G5	16
BP	GO:0043506	regulation of JUN kinase activity	9/982	58/18723	0.00303934	0.0145976	0.0101417	CCL19/PTK2B/FGD2/SYK/PTPN1/TNF/TLR6/PTPN22/MAP3K13	9
BP	GO:0003018	vascular process in circulatory system	25/982	263/18723	0.00304508	0.014612	0.0101517	P2RX1/APOE/BMP6/SLCO2B1/TEK/SLC1A3/TBXAS1/GJA5/CD36/ADORA1/EDNRB/HRH1/KCNMA1/KLF2/FGA/PDE3A/CXCR2/CPS1/SLC6A20/LRP1/ACE/ADRB2/EDNRA/CALCA/ANGPT1	25
BP	GO:1901654	response to ketone	20/982	194/18723	0.00305063	0.0146254	0.010161	MAP4K1/CCR7/NR1H3/CYBB/CCL19/TNC/CCL21/SLIT3/PTGER4/PTAFR/FOXP3/KLF2/CLDN1/TGFB2/NCOA4/BCL2L1/HSF1/CPS1/TGFBR3/FECH	20
BP	GO:1905952	regulation of lipid localization	19/982	181/18723	0.00312886	0.0149869	0.0104122	NR1H3/APOE/FASLG/BMP6/APOC1/SYK/ANXA2/CD36/C3/MAP2K6/PLIN3/ABCA8/ABCA1/TNF/ABCG1/MSR1/OSBPL11/LRP1/C1QTNF1	19
BP	GO:0010893	positive regulation of steroid biosynthetic process	5/982	20/18723	0.00314728	0.0150616	0.0104641	IFNG/BMP6/TNF/ABCG1/PPARGC1A	5
BP	GO:0015833	peptide transport	25/982	264/18723	0.00320125	0.0153061	0.0106339	CCL5/IFNG/SLC15A3/PPP3CA/JAK2/ADORA1/ANXA1/DPP4/TAP1/CAMK2N1/ABCA1/RAB8B/FGA/CD209/ANO1/TNF/ABCG1/LRP5/TAP2/LRP1/CYB5R4/GLUL/S100A8/CRHBP/SOX4	25
BP	GO:0032373	positive regulation of sterol transport	7/982	38/18723	0.00323423	0.0154359	0.0107242	NR1H3/APOE/ANXA2/ABCA8/ABCA1/ABCG1/LRP1	7
BP	GO:0032376	positive regulation of cholesterol transport	7/982	38/18723	0.00323423	0.0154359	0.0107242	NR1H3/APOE/ANXA2/ABCA8/ABCA1/ABCG1/LRP1	7
BP	GO:0001960	negative regulation of cytokine-mediated signaling pathway	11/982	81/18723	0.00327286	0.0156063	0.0108425	PTPRC/CCL5/CARD8/NR1H3/STAP1/SAMHD1/SH2B3/SLIT3/MUL1/IRAK3/ROBO1	11
BP	GO:0032231	regulation of actin filament bundle assembly	13/982	105/18723	0.00334076	0.0159016	0.0110476	WAS/MET/GPR65/PLEK/S1PR1/EVL/LIMK1/NRP1/PTGER4/S100A10/CX3CL1/CCDC88A/FLNA	13
BP	GO:0120034	positive regulation of plasma membrane bounded cell projection assembly	13/982	105/18723	0.00334076	0.0159016	0.0110476	CCR7/CCL19/CDC42EP1/CDC42EP3/CCL21/NRP1/P2RX7/RAC2/DNM3/CCDC88A/GPM6A/CDC42EP4/PLEKHM1	13
BP	GO:0051591	response to cAMP	12/982	93/18723	0.00335422	0.0159513	0.0110822	PIK3CG/PTK2B/ZFP36L1/TEK/STAT1/PTAFR/CDO1/AQP9/APP/CPS1/CNGA3/CRHBP	12
BP	GO:0050808	synapse organization	36/982	426/18723	0.0033747	0.0160344	0.0111399	IL10RA/AMIGO2/LILRB2/APOE/SEMA4D/TNC/C1QA/IL1RAP/FCGR2B/EFNB2/C1QB/SRGN/DOCK10/NRP1/CAST/C5AR1/FYN/IL10/SPARCL1/SNCA/C3/CX3CL1/FGF13/ANK3/DNM3/TNF/APP/FLNA/CTNND2/SDCBP/NPTN/DVL1/GPM6A/GPC4/NEDD4/LRRN3	36
BP	GO:0048010	vascular endothelial growth factor receptor signaling pathway	9/982	59/18723	0.00342311	0.0162353	0.0112795	PRKCB/HHEX/PTK2B/MAPKAPK3/NRP1/FYN/VAV1/PTPN1/NEDD4	9
BP	GO:0050732	negative regulation of peptidyl-tyrosine phosphorylation	9/982	59/18723	0.00342311	0.0162353	0.0112795	PTPRC/LILRB4/SAMSN1/SEMA4D/PTPN6/SH2B3/CD300A/MVP/LRRK1	9
BP	GO:0009310	amine catabolic process	6/982	29/18723	0.00344494	0.0163243	0.0113413	KMO/HAAO/IDO1/TDO2/HNMT/MOXD1	6
BP	GO:0009185	ribonucleoside diphosphate metabolic process	13/982	106/18723	0.00362969	0.0171476	0.0119133	NT5E/SLC2A6/IFNG/CBFA2T3/MPP1/P2RX7/ADPGK/BPGM/APP/HK3/PPARGC1A/DLG2/PGM1	13
BP	GO:0030038	contractile actin filament bundle assembly	13/982	106/18723	0.00362969	0.0171476	0.0119133	WAS/MET/GPR65/S1PR1/EVL/PTK2B/LIMK1/NRP1/PTGER4/ITGB5/S100A10/PHACTR1/CCDC88A	13
BP	GO:0043149	stress fiber assembly	13/982	106/18723	0.00362969	0.0171476	0.0119133	WAS/MET/GPR65/S1PR1/EVL/PTK2B/LIMK1/NRP1/PTGER4/ITGB5/S100A10/PHACTR1/CCDC88A	13
BP	GO:0006869	lipid transport	34/982	398/18723	0.00364184	0.0171476	0.0119133	PLA2G2D/NR1H3/KCNN4/APOE/FASLG/APOL3/ABCD2/GM2A/BMP6/SLCO2B1/APOC1/SYK/PSAP/ANXA2/CD36/ANXA1/APOL6/AKR1C1/P2RX7/MAP2K6/ATP10A/AQP9/ABCA8/ABCA1/FABP4/ABCA6/ABCG1/MSR1/OSBPL11/LRP1/ACE/C1QTNF1/SCARB2/PLA2G5	34
BP	GO:0031644	regulation of nervous system process	16/982	144/18723	0.00367304	0.0171476	0.0119133	TNFRSF1B/ITGA2/ITGAX/PTK2B/JAM2/CST7/ADORA1/EDNRB/IL10/TYMP/PTAFR/MGLL/EGR2/APP/ADRB2/DVL1	16
BP	GO:0006586	indolalkylamine metabolic process	4/982	13/18723	0.00367356	0.0171476	0.0119133	KMO/HAAO/IDO1/TDO2	4
BP	GO:0016322	neuron remodeling	4/982	13/18723	0.00367356	0.0171476	0.0119133	C1QA/C3/CX3CL1/APP	4
BP	GO:0032494	response to peptidoglycan	4/982	13/18723	0.00367356	0.0171476	0.0119133	C5AR1/IRF5/NOD2/IRAK3	4
BP	GO:0033700	phospholipid efflux	4/982	13/18723	0.00367356	0.0171476	0.0119133	APOE/APOC1/ABCA1/ABCG1	4
BP	GO:0034135	regulation of toll-like receptor 2 signaling pathway	4/982	13/18723	0.00367356	0.0171476	0.0119133	TNFAIP3/TLR1/NOD2/TLR6	4
BP	GO:0036005	response to macrophage colony-stimulating factor	4/982	13/18723	0.00367356	0.0171476	0.0119133	TLR4/STAP1/CSF1R/FER	4
BP	GO:0036006	cellular response to macrophage colony-stimulating factor stimulus	4/982	13/18723	0.00367356	0.0171476	0.0119133	TLR4/STAP1/CSF1R/FER	4
BP	GO:0042362	fat-soluble vitamin biosynthetic process	4/982	13/18723	0.00367356	0.0171476	0.0119133	GFI1/IFNG/TNF/CYP27A1	4
BP	GO:0043379	memory T cell differentiation	4/982	13/18723	0.00367356	0.0171476	0.0119133	FGL2/IL12RB1/IL12B/HLA-DRA	4
BP	GO:0070424	regulation of nucleotide-binding oligomerization domain containing signaling pathway	4/982	13/18723	0.00367356	0.0171476	0.0119133	TLR4/TNFAIP3/SLC15A3/PTPN22	4
BP	GO:1900272	negative regulation of long-term synaptic potentiation	4/982	13/18723	0.00367356	0.0171476	0.0119133	APOE/ADORA1/TYROBP/APP	4
BP	GO:2001198	regulation of dendritic cell differentiation	4/982	13/18723	0.00367356	0.0171476	0.0119133	LILRB1/LILRB2/FCGR2B/TMEM176B	4
BP	GO:0002762	negative regulation of myeloid leukocyte differentiation	8/982	49/18723	0.00369574	0.017236	0.0119747	LILRB1/TLR4/LILRB4/LILRB3/INPP5D/MAFB/GPR137B/CLDN18	8
BP	GO:2001257	regulation of cation channel activity	19/982	184/18723	0.00375404	0.0174925	0.012153	PDE4B/PLCG2/CTSS/CCR2/IFNG/PTK2B/STAC/IFNGR2/FGF13/ANK3/APP/KCNE4/MMP9/PPARGC1A/ADRB2/CCL2/PDE4D/RGS9/CRHBP	19
BP	GO:0030282	bone mineralization	14/982	119/18723	0.00380724	0.0177248	0.0123144	S1PR1/ACVR1/FGR/CCR1/BMP6/GPNMB/PTK2B/SRGN/SNX10/P2RX7/TUFT1/ADRB2/BMP2K/ATF4	14
BP	GO:0010975	regulation of neuron projection development	37/982	445/18723	0.00390583	0.0181679	0.0126222	GFI1/APOE/SEMA4D/PTK2B/SEMA3C/EFNB2/LIMK1/CXCL12/B2M/PLXNC1/PPP3CA/TRPV2/NRP1/FYN/PTPRG/DDX56/ENC1/CX3CL1/FGF13/DNM3/CCDC88A/CTSZ/FLNA/DGUOK/ROR1/LRP1/NPTN/MAP3K13/DVL1/SCARB2/IQGAP1/ROBO1/CHN1/NEDD4/SETX/FBXO38/PMP22	37
BP	GO:0010878	cholesterol storage	5/982	21/18723	0.00395474	0.0183633	0.0127579	NR1H3/CD36/ABCA1/ABCG1/MSR1	5
BP	GO:0038083	peptidyl-tyrosine autophosphorylation	5/982	21/18723	0.00395474	0.0183633	0.0127579	ITK/PTK2B/TXK/ACE/IQGAP1	5
BP	GO:0009896	positive regulation of catabolic process	40/982	492/18723	0.00408203	0.0189378	0.0131571	TNFRSF1B/PYHIN1/PTTG1IP/LAPTM5/APOE/ABCD2/IFNG/HMOX1/PTK2B/TNFAIP3/ZFP36L1/CBFA2T3/ADORA1/ADAM8/SMURF2/P2RX7/SNCA/PTPN1/MEFV/TRIM22/TNF/OPTN/CDKN1B/DCN/APP/AGTPBP1/CEBPA/NOD2/TIPARP/RALB/HSF1/LRP1/ADRB2/SPTLC1/CSNK1A1/UVRAG/DVL1/NEDD4/PIAS1/SESN1	40
BP	GO:0032480	negative regulation of type I interferon production	6/982	30/18723	0.00411826	0.0190228	0.0132161	LILRB1/CYLD/SIRPA/LILRA4/IL10/RNF125	6
BP	GO:0034694	response to prostaglandin	6/982	30/18723	0.00411826	0.0190228	0.0132161	CCR7/CCL19/TNC/CCL21/PTGER4/TGFBR3	6
BP	GO:0043032	positive regulation of macrophage activation	6/982	30/18723	0.00411826	0.0190228	0.0132161	TLR4/STAP1/IL33/IL10/CEBPA/TLR6	6
BP	GO:0061384	heart trabecula morphogenesis	6/982	30/18723	0.00411826	0.0190228	0.0132161	S1PR1/HEG1/TEK/ADAMTS1/TGFB2/TGFBR3	6
BP	GO:0070229	negative regulation of lymphocyte apoptotic process	6/982	30/18723	0.00411826	0.0190228	0.0132161	CCL5/CD27/PRKCQ/IL7R/BCL10/JAK3	6
BP	GO:0060425	lung morphogenesis	8/982	50/18723	0.00420171	0.0193914	0.0134722	TNC/SPRY2/FOXF1/TCF21/WNT2/TNF/CTSZ/HOXA5	8
BP	GO:0008217	regulation of blood pressure	19/982	186/18723	0.00422583	0.0194858	0.0135378	P2RX1/HMOX1/ACVRL1/GJA5/ADORA1/EDNRB/PRCP/PTAFR/CAMK2N1/RARRES2/CTSZ/CD34/LRP5/ACE/ADRB2/RENBP/PDE4D/EDNRA/CALCA	19
BP	GO:0032370	positive regulation of lipid transport	11/982	84/18723	0.00435044	0.020043	0.0139249	NR1H3/APOE/FASLG/BMP6/ANXA2/MAP2K6/ABCA8/ABCA1/ABCG1/LRP1/C1QTNF1	11
BP	GO:0030866	cortical actin cytoskeleton organization	7/982	40/18723	0.00436288	0.0200655	0.0139406	NCKAP1L/PLEK/LCP1/EPB41L3/FMNL1/TNF/EPB41L2	7
BP	GO:0071526	semaphorin-plexin signaling pathway	7/982	40/18723	0.00436288	0.0200655	0.0139406	MET/SEMA4D/SEMA3C/PLXNC1/NRP1/FLNA/SH3BP1	7
BP	GO:0086003	cardiac muscle cell contraction	10/982	73/18723	0.00463905	0.0213172	0.0148101	PDE4B/GJA5/ADORA1/KCNJ5/FGF13/SCN1A/KCNE4/FLNA/PDE4D/GSN	10
BP	GO:0042063	gliogenesis	27/982	301/18723	0.00473014	0.0216982	0.0150749	TNFRSF1B/TLR4/STAP1/CXCR4/CCR2/IFNG/LTA/C1QA/ASPA/PRKCH/PTK2B/IDH2/GPR183/ANXA1/C5AR1/CX3CL1/TNF/EGR2/APP/TGFB2/CSK/FPR2/ROR1/LRP1/CCL2/S100A8/SOX4	27
BP	GO:0042886	amide transport	27/982	301/18723	0.00473014	0.0216982	0.0150749	CCL5/IFNG/SLC15A3/PSAP/PPP3CA/JAK2/ADORA1/ANXA1/DPP4/TAP1/CAMK2N1/AQP9/ABCA1/RAB8B/FGA/CD209/ANO1/TNF/ABCG1/LRP5/TAP2/LRP1/CYB5R4/GLUL/S100A8/CRHBP/SOX4	27
BP	GO:0043124	negative regulation of I-kappaB kinase/NF-kappaB signaling	8/982	51/18723	0.00475937	0.0218134	0.0151549	CARD8/RHOH/LILRB4/TNFAIP3/TNIP3/STAT1/OPTN/RORA	8
BP	GO:0046173	polyol biosynthetic process	9/982	62/18723	0.00480632	0.0220096	0.0152913	PLEK/PLCG2/PTK2B/CD244/HRH1/SNCA/PTAFR/CYP27A1/SPTLC1	9
BP	GO:0001782	B cell homeostasis	6/982	31/18723	0.00488406	0.0223271	0.0155118	NCKAP1L/BCL10/TNFAIP3/DOCK10/FOXP3/TRAF3IP2	6
BP	GO:0048566	embryonic digestive tract development	6/982	31/18723	0.00488406	0.0223271	0.0155118	FOXF1/TCF21/HLX/RARRES2/TNF/TGFB2	6
BP	GO:0032727	positive regulation of interferon-alpha production	5/982	22/18723	0.00490008	0.0223427	0.0155226	TLR4/TLR8/TLR7/STAT1/IRF5	5
BP	GO:0071404	cellular response to low-density lipoprotein particle stimulus	5/982	22/18723	0.00490008	0.0223427	0.0155226	FCER1G/SYK/CD36/ABCA1/ITGB2	5
BP	GO:0090280	positive regulation of calcium ion import	5/982	22/18723	0.00490008	0.0223427	0.0155226	P2RX1/CXCL12/TRPV2/LGALS3/CCL2	5
BP	GO:0002756	MyD88-independent toll-like receptor signaling pathway	4/982	14/18723	0.00493158	0.0223711	0.0155424	TLR4/TNIP3/TRAF3/TLR6	4
BP	GO:0035791	platelet-derived growth factor receptor-beta signaling pathway	4/982	14/18723	0.00493158	0.0223711	0.0155424	PTPN12/PTPN1/LRP1/HIP1	4
BP	GO:0046348	amino sugar catabolic process	4/982	14/18723	0.00493158	0.0223711	0.0155424	NPL/NAGK/MGAT1/RENBP	4
BP	GO:0060732	positive regulation of inositol phosphate biosynthetic process	4/982	14/18723	0.00493158	0.0223711	0.0155424	CD244/HRH1/SNCA/PTAFR	4
BP	GO:0060841	venous blood vessel development	4/982	14/18723	0.00493158	0.0223711	0.0155424	SEMA3C/HEG1/FOXF1/ACVRL1	4
BP	GO:0090715	immunological memory formation process	4/982	14/18723	0.00493158	0.0223711	0.0155424	FGL2/IL12RB1/IL12B/HLA-DRA	4
BP	GO:0098742	cell-cell adhesion via plasma-membrane adhesion molecules	25/982	273/18723	0.0049366	0.0223747	0.0155449	CD6/ITGAL/AMIGO2/PECAM1/SELL/ACVR1/CD84/CRTAM/IL1RAP/IL10/SPARCL1/PCDH7/MPZL2/CDH3/CX3CL1/VCAM1/EPCAM/ITGB2/CD209/CLDN1/TGFB2/NPTN/GPC4/ROBO1/CLDN18	25
BP	GO:0009408	response to heat	13/982	110/18723	0.00499459	0.0226183	0.0157141	TFEC/HMOX1/CXCL12/CD14/TRPV2/CXCL10/STAC/ATM/ANO1/ST8SIA1/CD34/HSF1/CALCA	13
BP	GO:0003012	muscle system process	37/982	452/18723	0.00502509	0.022737	0.0157966	TNFRSF1B/PDE4B/P2RX1/CXCR4/PIK3CG/ITGA2/CALCRL/HMOX1/ANXA6/PPP3CA/MYOF/AIF1/GJA5/STAC/ADORA1/EDNRB/KCNJ5/GTF2IRD1/PTAFR/MAP2K6/FXYD1/FGF13/KCNMA1/SCN1A/KCNE4/ARHGEF11/FLNA/MYBPC2/PPARGC1A/ADRB2/IL15/PDE4D/GSN/EDNRA/CALCA/DES/MYL6B	37
BP	GO:0006936	muscle contraction	30/982	347/18723	0.00512655	0.0231764	0.0161019	PDE4B/P2RX1/CXCR4/PIK3CG/ITGA2/CALCRL/ANXA6/MYOF/GJA5/STAC/ADORA1/EDNRB/KCNJ5/PTAFR/MAP2K6/FXYD1/FGF13/KCNMA1/SCN1A/KCNE4/ARHGEF11/FLNA/MYBPC2/ADRB2/PDE4D/GSN/EDNRA/CALCA/DES/MYL6B	30
BP	GO:0060761	negative regulation of response to cytokine stimulus	11/982	86/18723	0.00521331	0.0235485	0.0163604	PTPRC/CCL5/CARD8/NR1H3/STAP1/SAMHD1/SH2B3/SLIT3/MUL1/IRAK3/ROBO1	11
BP	GO:1990778	protein localization to cell periphery	29/982	333/18723	0.00530038	0.0239215	0.0166195	EPB41L3/IFNG/EPHA2/PRKCH/TSPAN32/ANXA2/PKP3/STAC/GBP1/S100A10/LGALS3/SKAP1/MYO5A/FGF13/ANK3/RAB8B/TNF/OPTN/MAP7/CCDC88A/BCL2L1/CSK/FLNA/EFR3A/RAB40C/RHOG/LRP1/EPB41L2/GPC4	29
BP	GO:0016239	positive regulation of macroautophagy	9/982	63/18723	0.00535276	0.024117	0.0167553	HMOX1/OPTN/DCN/NOD2/RALB/ADRB2/SPTLC1/UVRAG/SESN1	9
BP	GO:0032233	positive regulation of actin filament bundle assembly	9/982	63/18723	0.00535276	0.024117	0.0167553	GPR65/PLEK/EVL/LIMK1/NRP1/S100A10/CX3CL1/CCDC88A/FLNA	9
BP	GO:0009132	nucleoside diphosphate metabolic process	14/982	124/18723	0.00550821	0.0247963	0.0172273	NT5E/SLC2A6/IFNG/ENTPD1/CBFA2T3/MPP1/P2RX7/ADPGK/BPGM/APP/HK3/PPARGC1A/DLG2/PGM1	14
BP	GO:0010977	negative regulation of neuron projection development	15/982	137/18723	0.00552694	0.0248385	0.0172566	GFI1/APOE/SEMA4D/SEMA3C/EFNB2/B2M/NRP1/PTPRG/FGF13/DNM3/CTSZ/FLNA/DGUOK/LRP1/PMP22	15
BP	GO:0055123	digestive system development	15/982	137/18723	0.00552694	0.0248385	0.0172566	PRDM1/PDGFC/FOXF1/EDNRB/TCF21/HLX/RARRES2/TNF/TGFB2/WLS/CPS1/HOXA5/BARX1/CLDN18/RB1	15
BP	GO:2001259	positive regulation of cation channel activity	10/982	75/18723	0.00563516	0.0253034	0.0175796	PLCG2/CTSS/CCR2/IFNG/STAC/IFNGR2/ANK3/ADRB2/CCL2/RGS9	10
BP	GO:0050792	regulation of viral process	17/982	164/18723	0.00569657	0.0255576	0.0177562	CCL5/CXCR4/CD4/APOBEC3G/LAMP3/CD28/STAT1/FCN1/CIITA/LY6E/TRIM22/CD209/TNF/CAV2/GSN/PML/APOBEC3F	17
BP	GO:0071496	cellular response to external stimulus	28/982	320/18723	0.00570447	0.0255714	0.0177658	PTPRC/TLR4/UPP1/TLR8/ITGA2/BCL10/TNC/BMP6/HMOX1/IRF1/TLR7/GADD45A/TNFRSF8/ITGA4/TNFSF14/AIF1/CASP1/PTGER4/MAP3K14/PIEZO2/VCAM1/RALB/IL15/GLUL/CASP5/ATF4/SLC39A4/SESN1	28
BP	GO:0003180	aortic valve morphogenesis	6/982	32/18723	0.00574945	0.0257174	0.0178672	SLIT3/TIE1/NFATC1/JAG1/ROBO1/RB1	6
BP	GO:2000515	negative regulation of CD4-positive, alpha-beta T cell activation	6/982	32/18723	0.00574945	0.0257174	0.0178672	RUNX3/TBX21/ANXA1/JAK3/HLX/FOXP3	6
BP	GO:0007520	myoblast fusion	7/982	42/18723	0.00576608	0.0257174	0.0178672	CD53/CXCL9/CAPN2/PLEKHO1/JAM2/CXCL10/MYOF	7
BP	GO:0016601	Rac protein signal transduction	7/982	42/18723	0.00576608	0.0257174	0.0178672	RHOH/PIK3CG/AIF1/RAC2/RHOG/STMN3/SH3BP1	7
BP	GO:0030890	positive regulation of B cell proliferation	7/982	42/18723	0.00576608	0.0257174	0.0178672	PTPRC/SASH3/NCKAP1L/TLR4/GPR183/TNFRSF4/BST1	7
BP	GO:0046688	response to copper ion	7/982	42/18723	0.00576608	0.0257174	0.0178672	SNCA/PAM/MT1F/MT1E/APP/HSF1/MT2A	7
BP	GO:0055076	transition metal ion homeostasis	15/982	138/18723	0.00590928	0.026334	0.0182956	LCK/IFNG/BMP6/HMOX1/STEAP3/B2M/SLC31A2/MT1F/MT1E/APP/NCOA4/S100A8/SLC39A4/EIF2AK1/MT2A	15
BP	GO:0060560	developmental growth involved in morphogenesis	22/982	234/18723	0.00594278	0.0264535	0.0183786	S1PR1/CXCR4/APOE/SEMA4D/TNC/SPRY2/SEMA3C/LIMK1/CXCL12/ITGA4/TRPV2/SLIT3/NRP1/CYFIP2/FGF13/APP/MUL1/LRP1/CCL11/MAP3K13/DVL1/IQGAP1	22
BP	GO:0001885	endothelial cell development	9/982	64/18723	0.00594605	0.0264535	0.0183786	PPP1R16B/MET/PECAM1/HEG1/FOXP3/CLDN1/TNF/FASN/PDE4D	9
BP	GO:0009162	deoxyribonucleoside monophosphate metabolic process	5/982	23/18723	0.00599514	0.0265828	0.0184685	UPP1/DCTD/TK2/TYMP/DGUOK	5
BP	GO:0034695	response to prostaglandin E	5/982	23/18723	0.00599514	0.0265828	0.0184685	CCR7/CCL19/CCL21/PTGER4/TGFBR3	5
BP	GO:0036303	lymph vessel morphogenesis	5/982	23/18723	0.00599514	0.0265828	0.0184685	EPHA2/VASH1/ACVRL1/TIE1/SVEP1	5
BP	GO:0050765	negative regulation of phagocytosis	5/982	23/18723	0.00599514	0.0265828	0.0184685	FCGR2B/SIRPA/CD300A/SYT11/CSK	5
BP	GO:0008347	glial cell migration	8/982	53/18723	0.00604304	0.0267283	0.0185695	STAP1/CCR2/IDH2/GPR183/CX3CL1/TGFB2/LRP1/CCL2	8
BP	GO:0034381	plasma lipoprotein particle clearance	8/982	53/18723	0.00604304	0.0267283	0.0185695	APOE/HMOX1/APOC1/ANXA2/CD36/LIPA/CSK/MSR1	8
BP	GO:0099172	presynapse organization	8/982	53/18723	0.00604304	0.0267283	0.0185695	IL1RAP/EFNB2/C5AR1/SNCA/APP/SDCBP/DVL1/GPC4	8
BP	GO:0031331	positive regulation of cellular catabolic process	35/982	427/18723	0.00611911	0.0270422	0.0187876	TNFRSF1B/PYHIN1/PTTG1IP/LAPTM5/APOE/ABCD2/IFNG/HMOX1/PTK2B/TNFAIP3/ZFP36L1/CBFA2T3/ADAM8/P2RX7/SNCA/PTPN1/MEFV/TRIM22/TNF/OPTN/DCN/APP/AGTPBP1/CEBPA/NOD2/RALB/HSF1/LRP1/ADRB2/SPTLC1/CSNK1A1/UVRAG/DVL1/PIAS1/SESN1	35
BP	GO:0009123	nucleoside monophosphate metabolic process	10/982	76/18723	0.00619205	0.0273191	0.01898	NT5E/UPP1/DCTD/MPP1/TK2/TYMP/PAICS/DGUOK/DLG2/ATIC	10
BP	GO:0031100	animal organ regeneration	10/982	76/18723	0.00619205	0.0273191	0.01898	LCP1/HMOX1/FLT3/CXCL12/ANXA3/C5AR1/IL10/CLDN1/TGFBR3/ATIC	10
BP	GO:0044106	cellular amine metabolic process	13/982	113/18723	0.00626658	0.0276249	0.0191925	SLC7A7/KMO/HAAO/IDO1/TDO2/SNCA/HNMT/LY6E/MOXD1/ITGB2/TGFB2/NAAA/HDC	13
BP	GO:0050679	positive regulation of epithelial cell proliferation	20/982	207/18723	0.00630857	0.027787	0.0193051	PPP1R16B/STAT5A/BMP6/HMOX1/PIK3CD/TNFAIP3/TEK/CXCL12/ITGA4/ACVRL1/NRP1/C5AR1/IL10/CDH3/WNT2/CLDN1/CAV2/NOD2/CCL11/GLUL	20
BP	GO:0002730	regulation of dendritic cell cytokine production	4/982	15/18723	0.00644901	0.028265	0.0196372	TLR4/PLCG2/JAK3/NOD2	4
BP	GO:0002836	positive regulation of response to tumor cell	4/982	15/18723	0.00644901	0.028265	0.0196372	CD226/CRTAM/IL12B/FBXO38	4
BP	GO:0002839	positive regulation of immune response to tumor cell	4/982	15/18723	0.00644901	0.028265	0.0196372	CD226/CRTAM/IL12B/FBXO38	4
BP	GO:0010820	positive regulation of T cell chemotaxis	4/982	15/18723	0.00644901	0.028265	0.0196372	CCL5/CXCL13/CCR2/CCL21	4
BP	GO:0032488	Cdc42 protein signal transduction	4/982	15/18723	0.00644901	0.028265	0.0196372	WAS/APOE/NRP1/ABCA1	4
BP	GO:0034638	phosphatidylcholine catabolic process	4/982	15/18723	0.00644901	0.028265	0.0196372	PLA2G7/ENPP2/APOC1/PLA2G5	4
BP	GO:0006576	cellular biogenic amine metabolic process	12/982	101/18723	0.00656108	0.0287325	0.0199619	KMO/HAAO/IDO1/TDO2/SNCA/HNMT/LY6E/MOXD1/ITGB2/TGFB2/NAAA/HDC	12
BP	GO:0006509	membrane protein ectodomain proteolysis	7/982	43/18723	0.00658243	0.0287548	0.0199775	TNFRSF1B/PRKCQ/APOE/IFNG/ADAM8/IL10/TNF	7
BP	GO:0031952	regulation of protein autophosphorylation	7/982	43/18723	0.00658243	0.0287548	0.0199775	PTPRC/RASSF2/GPNMB/PDGFC/ACE/IQGAP1/MVP	7
BP	GO:0061383	trabecula morphogenesis	7/982	43/18723	0.00658243	0.0287548	0.0199775	S1PR1/SEMA4D/HEG1/TEK/ADAMTS1/TGFB2/TGFBR3	7
BP	GO:0015909	long-chain fatty acid transport	9/982	65/18723	0.00658874	0.0287587	0.0199802	PLA2G2D/APOE/ABCD2/SYK/CD36/ANXA1/FABP4/ACE/PLA2G5	9
BP	GO:0050974	detection of mechanical stimulus involved in sensory perception	6/982	33/18723	0.00672154	0.0292663	0.0203328	CXCR4/ITGA2/CXCL12/FYN/PIEZO2/SCN1A	6
BP	GO:0071353	cellular response to interleukin-4	6/982	33/18723	0.00672154	0.0292663	0.0203328	IL2RG/CORO1A/IL24/JAK3/FASN/PML	6
BP	GO:1904030	negative regulation of cyclin-dependent protein kinase activity	6/982	33/18723	0.00672154	0.0292663	0.0203328	HHEX/TNFAIP3/CAMK2N1/KAT2B/CDKN1B/CEBPA	6
BP	GO:0048545	response to steroid hormone	29/982	339/18723	0.00675917	0.029406	0.0204299	NR1H3/CYBB/BMP6/FLT3/ZFP36L1/JAK2/SLIT3/AIF1/ANXA3/ANXA1/PHB/IL10/HNMT/TCF21/PAM/PTAFR/CDO1/CLDN1/TNF/TGFB2/NCOA4/TAF7/CPS1/TFPI/CNGA3/FECH/ALPL/LBH/NEDD4	29
BP	GO:1901617	organic hydroxy compound biosynthetic process	22/982	237/18723	0.00687924	0.0299039	0.0207758	PLEK/PLCG2/GFI1/APOE/ZEB2/IFNG/BMP6/PTK2B/CD244/HRH1/SNCA/CDH3/PTAFR/MOXD1/TNF/INSIG2/TGFB2/CYP27A1/ABCG1/SPTLC1/CLCN2/HDC	22
BP	GO:0016052	carbohydrate catabolic process	16/982	154/18723	0.00702586	0.0305163	0.0212012	AOAH/SLC2A6/GM2A/IFNG/CBFA2T3/P2RX7/ADPGK/BPGM/APP/HK3/LRP5/PPARGC1A/SCARB2/PGM1/FUT7/PGD	16
BP	GO:0035296	regulation of tube diameter	15/982	141/18723	0.00718572	0.0311596	0.0216482	P2RX1/APOE/TBXAS1/GJA5/ADORA1/EDNRB/HRH1/KCNMA1/KLF2/FGA/CPS1/ACE/ADRB2/EDNRA/CALCA	15
BP	GO:0097746	blood vessel diameter maintenance	15/982	141/18723	0.00718572	0.0311596	0.0216482	P2RX1/APOE/TBXAS1/GJA5/ADORA1/EDNRB/HRH1/KCNMA1/KLF2/FGA/CPS1/ACE/ADRB2/EDNRA/CALCA	15
BP	GO:0030278	regulation of ossification	13/982	115/18723	0.00724894	0.0312915	0.0217399	S1PR1/ACVR1/CCR1/BMP6/PTK2B/SRGN/PTGER4/P2RX7/EGR2/TGFB2/ADRB2/CALCA/BMP2K	13
BP	GO:0006213	pyrimidine nucleoside metabolic process	5/982	24/18723	0.00725148	0.0312915	0.0217399	UPP1/APOBEC3G/TK2/TYMP/APOBEC3F	5
BP	GO:0032928	regulation of superoxide anion generation	5/982	24/18723	0.00725148	0.0312915	0.0217399	ACP5/SYK/TYROBP/ITGB2/FPR2	5
BP	GO:0035458	cellular response to interferon-beta	5/982	24/18723	0.00725148	0.0312915	0.0217399	PYHIN1/CAPN2/IRF1/STAT1/MNDA	5
BP	GO:0043302	positive regulation of leukocyte degranulation	5/982	24/18723	0.00725148	0.0312915	0.0217399	FGR/SYK/PTAFR/ITGB2/HLA-F	5
BP	GO:0050687	negative regulation of defense response to virus	5/982	24/18723	0.00725148	0.0312915	0.0217399	FGL2/SEC14L1/RNF125/FOXP3/MUL1	5
BP	GO:0035304	regulation of protein dephosphorylation	11/982	90/18723	0.00734131	0.0316278	0.0219735	PTPRC/PPP1R16B/NCKAP1L/LILRB2/JAK2/ADORA1/CD300A/LGALS3/TNF/CD33/HSP90B1	11
BP	GO:0046031	ADP metabolic process	11/982	90/18723	0.00734131	0.0316278	0.0219735	NT5E/SLC2A6/IFNG/CBFA2T3/P2RX7/ADPGK/BPGM/APP/HK3/PPARGC1A/PGM1	11
BP	GO:0000768	syncytium formation by plasma membrane fusion	8/982	55/18723	0.00757386	0.0325768	0.0226328	CD53/CXCL9/CAPN2/PLEKHO1/JAM2/CXCL10/MYOF/TYROBP	8
BP	GO:0140253	cell-cell fusion	8/982	55/18723	0.00757386	0.0325768	0.0226328	CD53/CXCL9/CAPN2/PLEKHO1/JAM2/CXCL10/MYOF/TYROBP	8
BP	GO:0035150	regulation of tube size	15/982	142/18723	0.00765708	0.0329081	0.022863	P2RX1/APOE/TBXAS1/GJA5/ADORA1/EDNRB/HRH1/KCNMA1/KLF2/FGA/CPS1/ACE/ADRB2/EDNRA/CALCA	15
BP	GO:0008037	cell recognition	21/982	225/18723	0.00767864	0.0329741	0.0229088	CD6/DOCK2/PECAM1/PRF1/CCR7/CD226/CXCR4/NCR3/CD5/CCL19/CRTAM/CCL21/NRP1/CD36/LGALS3/FCN1/CD209/APP/NPTN/ROBO1/PLA2G5	21
BP	GO:0043200	response to amino acid	13/982	116/18723	0.00778379	0.0333986	0.0232038	CYBB/CAPN2/PDGFC/FYN/CDO1/TNF/CDKN1B/LAMTOR3/BCL2L1/HSF1/CPS1/PPARGC1A/SESN1	13
BP	GO:0032770	positive regulation of monooxygenase activity	6/982	34/18723	0.0078074	0.0334729	0.0232554	APOE/IFNG/PTK2B/CDH3/FCER2/TNF	6
BP	GO:0030010	establishment of cell polarity	15/982	143/18723	0.00815278	0.0348973	0.024245	DOCK2/CCR7/CCL19/CRTAM/SPRY2/PTK2B/FOXF1/CCL21/FRMD4A/CYTH3/FGF13/TRAF3IP2/ARHGEF11/GSN/SH3BP1	15
BP	GO:0062013	positive regulation of small molecule metabolic process	15/982	143/18723	0.00815278	0.0348973	0.024245	NR1H3/ABCD2/IFNG/BMP6/CD244/ANXA1/HRH1/P2RX7/SNCA/PTAFR/KAT2B/TNF/APP/ABCG1/PPARGC1A	15
BP	GO:0031099	regeneration	19/982	198/18723	0.00819394	0.034961	0.0242892	LCP1/TNC/HMOX1/FLT3/CXCL12/PPP3CA/JAK2/ANXA3/ANXA1/C5AR1/IL10/TXK/PTPN12/CLDN1/CDKN1B/FLNA/LRP1/TGFBR3/ATIC	19
BP	GO:0016049	cell growth	38/982	482/18723	0.00820394	0.034961	0.0242892	DCBLD2/PRKCQ/CXCR4/APOE/RASGRP2/SEMA4D/EPB41L3/PTK2B/SEMA3C/LIMK1/CXCL12/ITGA4/TRPV2/ACVRL1/SLIT3/CRLF3/NRP1/PHB/FBLN5/CYFIP2/FGF13/FRZB/CDKN1B/APP/TGFB2/MUL1/ARHGEF11/RPS6KA3/PAK4/SDCBP/LRP1/MAP3K13/DVL1/IQGAP1/PML/RB1/S100A8/SMARCA2	38
BP	GO:0002371	dendritic cell cytokine production	4/982	16/18723	0.00824663	0.034961	0.0242892	TLR4/PLCG2/JAK3/NOD2	4
BP	GO:0003084	positive regulation of systemic arterial blood pressure	4/982	16/18723	0.00824663	0.034961	0.0242892	ADORA1/CAMK2N1/RARRES2/ACE	4
BP	GO:0009074	aromatic amino acid family catabolic process	4/982	16/18723	0.00824663	0.034961	0.0242892	KMO/HAAO/IDO1/TDO2	4
BP	GO:0034374	low-density lipoprotein particle remodeling	4/982	16/18723	0.00824663	0.034961	0.0242892	PLA2G7/APOE/ABCG1/PLA2G5	4
BP	GO:0035067	negative regulation of histone acetylation	4/982	16/18723	0.00824663	0.034961	0.0242892	SNCA/FOXP3/SPI1/TAF7	4
BP	GO:0035864	response to potassium ion	4/982	16/18723	0.00824663	0.034961	0.0242892	HSF1/PPARGC1A/DLG2/CRHBP	4
BP	GO:0070230	positive regulation of lymphocyte apoptotic process	4/982	16/18723	0.00824663	0.034961	0.0242892	CCL5/IDO1/ADAM8/IL10	4
BP	GO:0070365	hepatocyte differentiation	4/982	16/18723	0.00824663	0.034961	0.0242892	ITGA2/ANXA1/FRZB/CPS1	4
BP	GO:0071391	cellular response to estrogen stimulus	4/982	16/18723	0.00824663	0.034961	0.0242892	ARID5A/SERPINB9/NCOA4/CRHBP	4
BP	GO:2001267	regulation of cysteine-type endopeptidase activity involved in apoptotic signaling pathway	4/982	16/18723	0.00824663	0.034961	0.0242892	JAK2/MMP9/GSN/NLE1	4
BP	GO:0032608	interferon-beta production	8/982	56/18723	0.00844055	0.035726	0.0248208	LILRB1/TLR4/TLR8/IRF1/TLR7/SIRPA/TRAF3/IRF5	8
BP	GO:0032648	regulation of interferon-beta production	8/982	56/18723	0.00844055	0.035726	0.0248208	LILRB1/TLR4/TLR8/IRF1/TLR7/SIRPA/TRAF3/IRF5	8
BP	GO:0035307	positive regulation of protein dephosphorylation	7/982	45/18723	0.00846851	0.0357874	0.0248634	PTPRC/PPP1R16B/LILRB2/JAK2/ADORA1/CD300A/CD33	7
BP	GO:0042551	neuron maturation	7/982	45/18723	0.00846851	0.0357874	0.0248634	C1QA/EDNRB/C3/CX3CL1/APP/MAP3K13/RB1	7
BP	GO:0016050	vesicle organization	26/982	300/18723	0.00848736	0.0358385	0.0248989	SLAMF1/CORO1A/RAB38/FASLG/STX11/ZEB2/SRGN/ANXA2/SNX10/ANXA1/SYT11/S100A10/SNCA/ABCA1/RAB8B/CAV2/CD34/ABCG1/SDCBP/PREB/UVRAG/SCARB2/YIPF5/TBC1D4/PLEKHM1/PLA2G5	26
BP	GO:0071559	response to transforming growth factor beta	23/982	256/18723	0.00851155	0.0359121	0.02495	LPXN/RUNX3/ACVR1/ZEB2/ARRB2/SPRY2/HPGD/ZFP36L1/ACVRL1/CHST11/SMURF2/FYN/ITGB5/WNT2/SPI1/CLDN1/CAV2/TGFB2/PDE3A/SDCBP/PPARGC1A/TGFBR3/PML	23
BP	GO:0046890	regulation of lipid biosynthetic process	17/982	171/18723	0.00856394	0.0361045	0.0250837	RAB38/NR1H3/GFI1/APOE/ABCD2/CAPN2/IFNG/BMP6/APOC1/ANXA1/C3/TNF/INSIG2/ABCG1/PPARGC1A/CLCN2/CREBL2	17
BP	GO:0002040	sprouting angiogenesis	18/982	185/18723	0.00863168	0.0363612	0.0252621	PPP1R16B/CARD10/EPHA2/HMOX1/PTK2B/EFNB2/TEK/ACVRL1/NRP1/ANXA1/IL10/IL12B/KLF2/MAP3K3/MEOX2/GLUL/ROBO1/ANGPT1	18
BP	GO:0010560	positive regulation of glycoprotein biosynthetic process	5/982	25/18723	0.00868032	0.0364217	0.0253041	CCR7/CCL19/IL33/CCL21/IL15	5
BP	GO:0042730	fibrinolysis	5/982	25/18723	0.00868032	0.0364217	0.0253041	SERPING1/PLAT/ANXA2/PLAU/FGA	5
BP	GO:0042832	defense response to protozoan	5/982	25/18723	0.00868032	0.0364217	0.0253041	IRF4/IRF8/TSPAN32/IL10/IL12B	5
BP	GO:0072012	glomerulus vasculature development	5/982	25/18723	0.00868032	0.0364217	0.0253041	PECAM1/TEK/TCF21/CD34/ANGPT1	5
BP	GO:0090330	regulation of platelet aggregation	5/982	25/18723	0.00868032	0.0364217	0.0253041	PRKCQ/SH2B3/SYK/JAK2/C1QTNF1	5
BP	GO:0031640	killing of cells of other organism	9/982	68/18723	0.00883914	0.0370296	0.0257264	PRF1/IFNG/SYK/GNLY/LYZ/P2RX7/SERPINB9/FCER2/BCL2L1	9
BP	GO:0042698	ovulation cycle	9/982	68/18723	0.00883914	0.0370296	0.0257264	EREG/ARRB2/SLIT3/PAM/MAP2K6/ETS1/ADAMTS1/TGFB2/NRIP1	9
BP	GO:0001570	vasculogenesis	10/982	80/18723	0.00885875	0.0370533	0.0257429	EPHA2/RASA1/ZFP36L1/HEG1/FOXF1/QKI/TIE1/CD34/TIPARP/TGFBR3	10
BP	GO:0071229	cellular response to acid chemical	10/982	80/18723	0.00885875	0.0370533	0.0257429	CYBB/CAPN2/PDGFC/FYN/KLF2/TNF/LAMTOR3/BCL2L1/HSF1/SESN1	10
BP	GO:0006471	protein ADP-ribosylation	6/982	35/18723	0.00901398	0.0376729	0.0261734	IFNG/PARP3/KAT2B/TIPARP/ART4/PARP11	6
BP	GO:0010506	regulation of autophagy	27/982	317/18723	0.00923856	0.0385812	0.0268044	IL10RA/MET/IFNG/HMOX1/LAMP3/HERC1/PSAP/CASP1/IL10/GPR137B/ATM/SNCA/MEFV/ITPR1/TRIM22/OPTN/ATP6V1B2/DCN/NOD2/RALB/FEZ2/ADRB2/PTPN22/SPTLC1/UVRAG/NEDD4/SESN1	27
BP	GO:0006949	syncytium formation	8/982	57/18723	0.00937936	0.0391384	0.0271915	CD53/CXCL9/CAPN2/PLEKHO1/JAM2/CXCL10/MYOF/TYROBP	8
BP	GO:1903169	regulation of calcium ion transmembrane transport	16/982	159/18723	0.00944798	0.0393938	0.0273689	CORO1A/PDE4B/PLCG2/P2RX1/PIK3CG/CXCL9/PTPN6/PTK2B/CXCL10/STAC/FYN/SNCA/CX3CL1/CXCL11/PDE4D/RGS9	16
BP	GO:0061028	establishment of endothelial barrier	7/982	46/18723	0.00954774	0.0397785	0.0276362	PPP1R16B/PECAM1/FOXP3/CLDN1/TNF/FASN/PDE4D	7
BP	GO:1905477	positive regulation of protein localization to membrane	12/982	106/18723	0.00955752	0.0397881	0.0276429	GZMB/IFNG/EPHA2/PRKCH/STAC/FYN/LGALS3/ANK3/ITGB2/TNF/RHOG/LRP1	12
BP	GO:0051222	positive regulation of protein transport	26/982	303/18723	0.00958955	0.0398901	0.0277138	HCLS1/TLR4/GZMB/KCNN4/IFNG/BMP6/JAK2/FRMD4A/ADAM8/FYN/RAC2/CAMK2N1/ANK3/FGA/ITGB2/ANO1/TNF/TGFB2/WLS/EDEM1/CD33/FLNA/ABCG1/LRP1/GLUL/SOX4	26
BP	GO:0006096	glycolytic process	10/982	81/18723	0.00964549	0.0400288	0.0278101	SLC2A6/IFNG/CBFA2T3/P2RX7/ADPGK/BPGM/APP/HK3/PPARGC1A/PGM1	10
BP	GO:0048708	astrocyte differentiation	10/982	81/18723	0.00964549	0.0400288	0.0278101	TLR4/IFNG/C1QA/C5AR1/TNF/APP/FPR2/ROR1/LRP1/S100A8	10
BP	GO:0051817	modulation of process of other organism involved in symbiotic interaction	10/982	81/18723	0.00964549	0.0400288	0.0278101	CCL5/APOE/CD4/CCL4/PHB/SERPINB9/CCL8/CAV2/SFTPD/BCL2L1	10
BP	GO:0034605	cellular response to heat	9/982	69/18723	0.00970547	0.0401835	0.0279176	TFEC/HMOX1/CXCL10/STAC/ATM/ANO1/ST8SIA1/CD34/HSF1	9
BP	GO:0050810	regulation of steroid biosynthetic process	9/982	69/18723	0.00970547	0.0401835	0.0279176	GFI1/APOE/IFNG/BMP6/TNF/INSIG2/ABCG1/PPARGC1A/CLCN2	9
BP	GO:1904377	positive regulation of protein localization to cell periphery	9/982	69/18723	0.00970547	0.0401835	0.0279176	IFNG/EPHA2/PRKCH/STAC/LGALS3/TNF/RHOG/LRP1/EPB41L2	9
BP	GO:1903035	negative regulation of response to wounding	11/982	94/18723	0.0100923	0.0417525	0.0290077	APOE/SERPING1/PLAT/SH2B3/ANXA2/PLAU/FGA/TNF/CD34/C1QTNF1/TFPI	11
BP	GO:0045732	positive regulation of protein catabolic process	21/982	231/18723	0.0102115	0.0422108	0.029326	TNFRSF1B/PYHIN1/PTTG1IP/LAPTM5/APOE/IFNG/PTK2B/TNFAIP3/CBFA2T3/ADAM8/SMURF2/TNF/CDKN1B/AGTPBP1/CEBPA/TIPARP/LRP1/CSNK1A1/DVL1/NEDD4/PIAS1	21
BP	GO:0051341	regulation of oxidoreductase activity	12/982	107/18723	0.0102673	0.0422108	0.029326	GZMA/GFI1/APOE/SLAMF8/IFNG/PTK2B/SNCA/CDH3/FCER2/TNF/NOD2/AOC3	12
BP	GO:0001562	response to protozoan	5/982	26/18723	0.0102924	0.0422108	0.029326	IRF4/IRF8/TSPAN32/IL10/IL12B	5
BP	GO:0002418	immune response to tumor cell	5/982	26/18723	0.0102924	0.0422108	0.029326	PRF1/CD226/CRTAM/IL12B/FBXO38	5
BP	GO:0034114	regulation of heterotypic cell-cell adhesion	5/982	26/18723	0.0102924	0.0422108	0.029326	LCK/IL10/SKAP1/FGA/TNF	5
BP	GO:0045672	positive regulation of osteoclast differentiation	5/982	26/18723	0.0102924	0.0422108	0.029326	CCR1/IFNG/TYROBP/IL12B/TNF	5
BP	GO:0048668	collateral sprouting	5/982	26/18723	0.0102924	0.0422108	0.029326	SEMA4D/FGF13/APP/LRP1/DVL1	5
BP	GO:0070102	interleukin-6-mediated signaling pathway	5/982	26/18723	0.0102924	0.0422108	0.029326	GFI1/JAK2/SPI1/FER/CEBPA	5
BP	GO:0032604	granulocyte macrophage colony-stimulating factor production	4/982	17/18723	0.0103434	0.0422108	0.029326	CD84/SYK/IL12B/RASGRP1	4
BP	GO:0032645	regulation of granulocyte macrophage colony-stimulating factor production	4/982	17/18723	0.0103434	0.0422108	0.029326	CD84/SYK/IL12B/RASGRP1	4
BP	GO:0033623	regulation of integrin activation	4/982	17/18723	0.0103434	0.0422108	0.029326	PLEK/CXCL13/PTGER4/SKAP1	4
BP	GO:0036092	phosphatidylinositol-3-phosphate biosynthetic process	4/982	17/18723	0.0103434	0.0422108	0.029326	PIK3CG/PIK3CD/ATM/PIK3C2B	4
BP	GO:0042953	lipoprotein transport	4/982	17/18723	0.0103434	0.0422108	0.029326	PRKCB/CD36/MSR1/LRP1	4
BP	GO:0061298	retina vasculature development in camera-type eye	4/982	17/18723	0.0103434	0.0422108	0.029326	ACVRL1/CYP1B1/NRP1/LRP5	4
BP	GO:0097067	cellular response to thyroid hormone stimulus	4/982	17/18723	0.0103434	0.0422108	0.029326	CTSS/LMO2/CTSB/PPARGC1A	4
BP	GO:0003230	cardiac atrium development	6/982	36/18723	0.0103481	0.0422108	0.029326	ACVR1/HEG1/GJA5/WNT2/TGFB2/SOX4	6
BP	GO:0030224	monocyte differentiation	6/982	36/18723	0.0103481	0.0422108	0.029326	CD4/INPP5D/ZFP36L1/CSF2/CSF1R/FASN	6
BP	GO:0071375	cellular response to peptide hormone stimulus	25/982	290/18723	0.0103517	0.0422108	0.029326	PRKCB/PRKCQ/STAT5A/ZFP36L1/BCAR3/JAK2/GRB2/JAK3/FYN/STAT1/MYO5A/KAT2B/PTPN1/RAB8B/RARRES2/INSIG2/CAV2/FER/CSK/HSF1/CYSLTR2/CPS1/TBC1D4/FUT7/CRHBP	25
BP	GO:0009895	negative regulation of catabolic process	27/982	320/18723	0.0103871	0.0422108	0.029326	IL10RA/MET/PIK3CG/HMOX1/MYCBP2/LAMP3/APOC1/HERC1/CBFA2T3/ANXA2/PKP3/ADORA1/PHB/FYN/IL10/SNCA/USP25/TRAF3IP2/TNF/FLNA/SDCBP/FEZ2/PPARGC1A/PTPN22/IRAK3/PML/AGAP2	27
BP	GO:0016042	lipid catabolic process	27/982	320/18723	0.0103871	0.0422108	0.029326	PLA2G2D/AOAH/PLCG2/PLA2G7/PIK3CG/APOE/ABCD2/GM2A/ENPP2/APOC1/CYP1B1/ADORA1/PLCB2/PLA1A/LIPA/HSD11B1/MGLL/PLA2G4C/RARRES2/TNF/CYP27A1/NAAA/DECR2/CPS1/LRP1/MCAT/PLA2G5	27
BP	GO:0010043	response to zinc ion	8/982	58/18723	0.0103938	0.0422108	0.029326	HAAO/PAM/VCAM1/MT1F/MT1E/CPS1/S100A8/MT2A	8
BP	GO:0010559	regulation of glycoprotein biosynthetic process	8/982	58/18723	0.0103938	0.0422108	0.029326	CCR7/ITM2A/CCL19/IL33/CCL21/JAK3/IL15/NECAB3	8
BP	GO:0035904	aorta development	8/982	58/18723	0.0103938	0.0422108	0.029326	PRDM1/ACVRL1/TGFB2/JAG1/LRP1/CNTRL/ROBO1/SOX4	8
BP	GO:0043666	regulation of phosphoprotein phosphatase activity	8/982	58/18723	0.0103938	0.0422108	0.029326	PTPRC/NCKAP1L/JAK2/CD300A/LGALS3/TNF/CD33/HSP90B1	8
BP	GO:0006757	ATP generation from ADP	10/982	82/18723	0.0104844	0.0425465	0.0295593	SLC2A6/IFNG/CBFA2T3/P2RX7/ADPGK/BPGM/APP/HK3/PPARGC1A/PGM1	10
BP	GO:1905475	regulation of protein localization to membrane	17/982	175/18723	0.010661	0.0432299	0.0300341	GZMB/IFNG/EPHA2/PRKCH/STAC/GBP1/FYN/LGALS3/ANK3/ITGB2/TNF/BCL2L1/CSK/RHOG/LRP1/GSN/GPC4	17
BP	GO:0010803	regulation of tumor necrosis factor-mediated signaling pathway	7/982	47/18723	0.0107241	0.0433533	0.0301199	CARD8/LAPTM5/CYLD/TNFAIP3/SYK/CASP1/SHARPIN	7
BP	GO:0043114	regulation of vascular permeability	7/982	47/18723	0.0107241	0.0433533	0.0301199	APOE/BMP6/TEK/HRH1/PDE3A/CXCR2/ANGPT1	7
BP	GO:0046677	response to antibiotic	7/982	47/18723	0.0107241	0.0433533	0.0301199	SLC1A3/JAK2/CIITA/CDKN1B/AOC3/CYB5R4/ALPL	7
BP	GO:0048483	autonomic nervous system development	7/982	47/18723	0.0107241	0.0433533	0.0301199	NRP1/EDNRB/HLX/VCAM1/EGR2/EDNRA/SOX4	7
BP	GO:0042177	negative regulation of protein catabolic process	13/982	121/18723	0.0109412	0.0441975	0.0307064	MYCBP2/LAMP3/ANXA2/PHB/FYN/IL10/SNCA/USP25/FLNA/SDCBP/IRAK3/PML/AGAP2	13
BP	GO:0033138	positive regulation of peptidyl-serine phosphorylation	12/982	108/18723	0.0110172	0.0444367	0.0308725	HCLS1/ARRB2/IFNG/STK4/SPRY2/TCL1A/BCAR3/SNCA/TNF/APP/CREBL2/ANGPT1	12
BP	GO:0034446	substrate adhesion-dependent cell spreading	12/982	108/18723	0.0110172	0.0444367	0.0308725	LPXN/ITGB7/TEK/ITGA4/NRP1/GBP1/FBLN1/S100A10/FGA/FER/ITGA8/FLNA	12
BP	GO:1903900	regulation of viral life cycle	15/982	148/18723	0.0110267	0.0444416	0.0308759	CCL5/CD4/APOBEC3G/LAMP3/CD28/FCN1/CIITA/LY6E/TRIM22/CD209/TNF/CAV2/GSN/PML/APOBEC3F	15
BP	GO:0007188	adenylate cyclase-modulating G protein-coupled receptor signaling pathway	21/982	233/18723	0.0111915	0.0450714	0.0313135	GPR65/PDE4B/S1PR1/CXCL9/CALCRL/PSAP/S1PR4/CXCL10/ADORA1/PTGER4/FPR1/RGS1/ABCA1/CXCL11/FLNA/GNA12/FPR2/ADRB2/PDE4D/EDNRA/CALCA	21
BP	GO:0001558	regulation of cell growth	33/982	414/18723	0.0112793	0.0453908	0.0315354	DCBLD2/PRKCQ/CXCR4/APOE/RASGRP2/SEMA4D/EPB41L3/PTK2B/SEMA3C/LIMK1/CXCL12/TRPV2/ACVRL1/SLIT3/CRLF3/NRP1/PHB/FBLN5/FGF13/FRZB/CDKN1B/TGFB2/MUL1/ARHGEF11/RPS6KA3/PAK4/SDCBP/LRP1/MAP3K13/PML/RB1/S100A8/SMARCA2	33
BP	GO:0001101	response to acid chemical	14/982	135/18723	0.0114021	0.04585	0.0318544	CYBB/CAPN2/PDGFC/FYN/CDO1/KLF2/TNF/CDKN1B/LAMTOR3/BCL2L1/HSF1/CPS1/PPARGC1A/SESN1	14
BP	GO:0032768	regulation of monooxygenase activity	8/982	59/18723	0.0114872	0.0461225	0.0320437	GFI1/APOE/IFNG/PTK2B/SNCA/CDH3/FCER2/TNF	8
BP	GO:0051353	positive regulation of oxidoreductase activity	8/982	59/18723	0.0114872	0.0461225	0.0320437	APOE/IFNG/PTK2B/SNCA/CDH3/FCER2/TNF/NOD2	8
BP	GO:0071230	cellular response to amino acid stimulus	9/982	71/18723	0.0116283	0.0466537	0.0324128	CYBB/CAPN2/PDGFC/FYN/TNF/LAMTOR3/BCL2L1/HSF1/SESN1	9
BP	GO:0022898	regulation of transmembrane transporter activity	24/982	278/18723	0.0116382	0.0466583	0.032416	PDE4B/PLCG2/CTSS/CCR2/IFNG/PTK2B/STAC/SNCA/PTAFR/IFNGR2/CAB39/FXYD1/FGF13/ANK3/APP/KCNE4/MMP9/PPARGC1A/ADRB2/CCL2/PDE4D/RGS9/NEDD4/CRHBP	24
BP	GO:0031646	positive regulation of nervous system process	6/982	37/18723	0.0118166	0.0473376	0.0328879	TNFRSF1B/ITGA2/ITGAX/CST7/PTAFR/EGR2	6
BP	GO:0061025	membrane fusion	16/982	163/18723	0.0118277	0.0473464	0.032894	SLAMF1/CORO1A/STX11/ANXA2/MYOF/ANXA1/SYT11/SNCA/TIE1/RAB8B/CAV2/UVRAG/YIPF5/TBC1D4/PLEKHM1/PLA2G5	16
BP	GO:0045926	negative regulation of growth	22/982	249/18723	0.0119077	0.047631	0.0330917	DCBLD2/SEMA4D/STK4/SEMA3C/ACVRL1/SLIT3/CRLF3/NRP1/PHB/MT1F/FGF13/FRZB/MT1E/CDKN1B/TGFB2/MUL1/ADRB2/MEIS1/PML/RB1/SMARCA2/MT2A	22
BP	GO:2001238	positive regulation of extrinsic apoptotic signaling pathway	7/982	48/18723	0.0120022	0.0479725	0.033329	PTPRC/BCL10/STK4/CYLD/G0S2/TNF/PML	7
BP	GO:0003171	atrioventricular valve development	5/982	27/18723	0.0120981	0.0482471	0.0335198	ACVR1/SLIT3/GJA5/TGFB2/SOX4	5
BP	GO:0031954	positive regulation of protein autophosphorylation	5/982	27/18723	0.0120981	0.0482471	0.0335198	RASSF2/GPNMB/PDGFC/ACE/IQGAP1	5
BP	GO:0042104	positive regulation of activated T cell proliferation	5/982	27/18723	0.0120981	0.0482471	0.0335198	SLAMF1/IL12RB1/IL12B/IL2RA/IL27RA	5
BP	GO:0010660	regulation of muscle cell apoptotic process	10/982	84/18723	0.0123273	0.0491242	0.0341292	CAPN2/ARRB2/IFNG/STK4/HMOX1/PTK2B/JAK2/IL12B/HSF1/CXCR2	10
BP	GO:0071560	cellular response to transforming growth factor beta stimulus	22/982	250/18723	0.0124335	0.0495101	0.0343973	LPXN/ACVR1/ZEB2/ARRB2/SPRY2/HPGD/ZFP36L1/ACVRL1/CHST11/SMURF2/FYN/ITGB5/WNT2/SPI1/CLDN1/CAV2/TGFB2/PDE3A/SDCBP/PPARGC1A/TGFBR3/PML	22
BP	GO:0016311	dephosphorylation	33/982	417/18723	0.0124523	0.0495481	0.0344236	NT5E/PTPRC/PPP1R16B/NCKAP1L/LCK/PTPN7/PLEK/LILRB2/ITGA2/DUSP6/SEMA4D/INPP5D/IFNG/ACP5/PTPN6/PPP3CA/JAK2/ADORA1/CD300A/CTDSPL/PTPRG/PTPN12/LGALS3/PTPN1/TNF/DUSP7/TGFB2/CD33/PTPN22/ALPL/CA3/HSP90B1/LRRK1	33
BP	GO:0050680	negative regulation of epithelial cell proliferation	16/982	164/18723	0.0124905	0.0496628	0.0345034	RUNX3/APOE/EREG/B2M/VASH1/ACVRL1/STAT1/IL12B/TNF/CDKN1B/CAV2/TGFB2/CCL2/TGFBR3/ROBO1/RB1	16
BP	GO:0030522	intracellular receptor signaling pathway	23/982	265/18723	0.0125572	0.0498909	0.0346618	DCBLD2/TLR4/NR1H3/CYLD/TNFAIP3/SLC15A3/SEC14L1/JAK2/PTGIS/PHB/TCF21/PRCP/MAP2K6/RNF125/KLF2/NCOA4/RORA/TAF7/NOD2/PTPN22/PML/LBH/NEDD4	23
BP	GO:0070252	actin-mediated cell contraction	11/982	97/18723	0.0126291	0.0501012	0.034808	PDE4B/GJA5/ADORA1/KCNJ5/FGF13/SCN1A/KCNE4/FLNA/PDE4D/GSN/MYL6B	11
BP	GO:2001237	negative regulation of extrinsic apoptotic signaling pathway	11/982	97/18723	0.0126291	0.0501012	0.034808	ACVR1/HMOX1/TNFAIP3/CSF2/NRP1/FYN/LGALS3/CX3CL1/FGA/TNF/BCL2L1	11
BP	GO:0043903	regulation of biological process involved in symbiotic interaction	9/982	72/18723	0.0126901	0.0502314	0.0348984	CD4/FCN1/CIITA/LY6E/TRIM22/CAV2/SFTPD/GSN/PML	9
BP	GO:0001946	lymphangiogenesis	4/982	18/18723	0.0127564	0.0502314	0.0348984	EPHA2/VASH1/ACVRL1/TIE1	4
BP	GO:0030728	ovulation	4/982	18/18723	0.0127564	0.0502314	0.0348984	EREG/HPGD/ADAMTS1/NRIP1	4
BP	GO:0031643	positive regulation of myelination	4/982	18/18723	0.0127564	0.0502314	0.0348984	TNFRSF1B/ITGAX/CST7/EGR2	4
BP	GO:0032634	interleukin-5 production	4/982	18/18723	0.0127564	0.0502314	0.0348984	LILRB4/IL1RAP/FOXP3/PDE4D	4
BP	GO:0032674	regulation of interleukin-5 production	4/982	18/18723	0.0127564	0.0502314	0.0348984	LILRB4/IL1RAP/FOXP3/PDE4D	4
BP	GO:0034134	toll-like receptor 2 signaling pathway	4/982	18/18723	0.0127564	0.0502314	0.0348984	TNFAIP3/TLR1/NOD2/TLR6	4
BP	GO:0044872	lipoprotein localization	4/982	18/18723	0.0127564	0.0502314	0.0348984	PRKCB/CD36/MSR1/LRP1	4
BP	GO:0061484	hematopoietic stem cell homeostasis	4/982	18/18723	0.0127564	0.0502314	0.0348984	MYCT1/EMCN/NLE1/SOX4	4
BP	GO:0150078	positive regulation of neuroinflammatory response	4/982	18/18723	0.0127564	0.0502314	0.0348984	PLCG2/STAP1/IL33/TNF	4
BP	GO:0007409	axonogenesis	33/982	418/18723	0.0128647	0.0506201	0.0351685	RHOH/PRKCQ/APOE/BCL11B/SEMA4D/EPHA2/MYCBP2/SEMA3C/EFNB2/LIMK1/CXCL12/PLXNC1/ITGA4/TRPV2/SLIT3/NRP1/FYN/RAC2/FGF13/ANK3/EGR2/APP/EFNA3/RHOG/FEZ2/LRP1/NPTN/MAP3K13/ETV1/DVL1/KIF5C/ROBO1/CHN1	33
BP	GO:0001820	serotonin secretion	3/982	10/18723	0.0130768	0.0510016	0.0354335	LILRB1/P2RX1/SYK	3
BP	GO:0031340	positive regulation of vesicle fusion	3/982	10/18723	0.0130768	0.0510016	0.0354335	ANXA2/ANXA1/SNCA	3
BP	GO:0033089	positive regulation of T cell differentiation in thymus	3/982	10/18723	0.0130768	0.0510016	0.0354335	IL7R/ADAM8/RASGRP1	3
BP	GO:0042045	epithelial fluid transport	3/982	10/18723	0.0130768	0.0510016	0.0354335	CSF2/EDNRB/ITPR1	3
BP	GO:0050861	positive regulation of B cell receptor signaling pathway	3/982	10/18723	0.0130768	0.0510016	0.0354335	PRKCB/STAP1/PRKCH	3
BP	GO:0060368	regulation of Fc receptor mediated stimulatory signaling pathway	3/982	10/18723	0.0130768	0.0510016	0.0354335	PTPRC/CD226/CSK	3
BP	GO:0061299	retina vasculature morphogenesis in camera-type eye	3/982	10/18723	0.0130768	0.0510016	0.0354335	CYP1B1/NRP1/LRP5	3
BP	GO:0070391	response to lipoteichoic acid	3/982	10/18723	0.0130768	0.0510016	0.0354335	TLR4/CD14/CD36	3
BP	GO:0071223	cellular response to lipoteichoic acid	3/982	10/18723	0.0130768	0.0510016	0.0354335	TLR4/CD14/CD36	3
BP	GO:0071803	positive regulation of podosome assembly	3/982	10/18723	0.0130768	0.0510016	0.0354335	LCP1/CSF2/TNF	3
BP	GO:0090647	modulation of age-related behavioral decline	3/982	10/18723	0.0130768	0.0510016	0.0354335	B2M/APP/CCL11	3
BP	GO:0150172	regulation of phosphatidylcholine metabolic process	3/982	10/18723	0.0130768	0.0510016	0.0354335	RAB38/CAPN2/APOC1	3
BP	GO:0030857	negative regulation of epithelial cell differentiation	7/982	49/18723	0.0133866	0.0520948	0.036193	IFNG/SPRY2/ACVRL1/STAT1/FRZB/MMP9/JAG1	7
BP	GO:0038084	vascular endothelial growth factor signaling pathway	7/982	49/18723	0.0133866	0.0520948	0.036193	SPRY2/PIK3CD/FLT3/NRP1/IL12B/DCN/ROBO1	7
BP	GO:0046580	negative regulation of Ras protein signal transduction	7/982	49/18723	0.0133866	0.0520948	0.036193	MET/RASA1/SPRY2/HEG1/TGFB2/RASA3/STMN3	7
BP	GO:0006882	cellular zinc ion homeostasis	6/982	38/18723	0.0134258	0.0521709	0.0362459	LCK/MT1F/MT1E/S100A8/SLC39A4/MT2A	6
BP	GO:0071392	cellular response to estradiol stimulus	6/982	38/18723	0.0134258	0.0521709	0.0362459	ITGA2/IL10/HSF1/PPARGC1A/CRHBP/NRIP1	6
BP	GO:0032412	regulation of ion transmembrane transporter activity	23/982	267/18723	0.0136377	0.0529558	0.0367912	PDE4B/PLCG2/CTSS/CCR2/IFNG/PTK2B/STAC/PTAFR/IFNGR2/CAB39/FXYD1/FGF13/ANK3/APP/KCNE4/MMP9/PPARGC1A/ADRB2/CCL2/PDE4D/RGS9/NEDD4/CRHBP	23
BP	GO:0061564	axon development	36/982	467/18723	0.0136781	0.0530737	0.0368731	RHOH/PRKCQ/APOE/BCL11B/SEMA4D/TNC/EPHA2/MYCBP2/SEMA3C/EFNB2/LIMK1/CXCL12/PLXNC1/ITGA4/TRPV2/JAK2/SLIT3/NRP1/FYN/RAC2/FGF13/ANK3/EGR2/APP/FLNA/EFNA3/RHOG/FEZ2/LRP1/NPTN/MAP3K13/ETV1/DVL1/KIF5C/ROBO1/CHN1	36
BP	GO:0035924	cellular response to vascular endothelial growth factor stimulus	9/982	73/18723	0.0138222	0.0535939	0.0372345	SPRY2/PIK3CD/FLT3/NRP1/ANXA1/IL12B/VCAM1/DCN/ROBO1	9
BP	GO:0050871	positive regulation of B cell activation	15/982	152/18723	0.0138538	0.0536772	0.0372924	PTPRC/SASH3/NCKAP1L/CD27/TLR4/BTK/INPP5D/TBX21/CD28/SYK/GPR183/IL10/TNFRSF4/NOD2/BST1	15
BP	GO:0010884	positive regulation of lipid storage	5/982	28/18723	0.014107	0.0545787	0.0379187	CD36/C3/PLIN3/MSR1/OSBPL11	5
BP	GO:1903020	positive regulation of glycoprotein metabolic process	5/982	28/18723	0.014107	0.0545787	0.0379187	CCR7/CCL19/IL33/CCL21/IL15	5
BP	GO:1904375	regulation of protein localization to cell periphery	13/982	125/18723	0.0141185	0.0545834	0.037922	IFNG/EPHA2/PRKCH/STAC/GBP1/LGALS3/TNF/BCL2L1/CSK/RHOG/LRP1/EPB41L2/GPC4	13
BP	GO:0010720	positive regulation of cell development	25/982	298/18723	0.0142031	0.0548703	0.0381213	TNFRSF1B/CXCR4/SEMA4D/IFNG/LTA/ASPA/PRKCH/LIMK1/CXCL12/PLXNC1/TRPV2/NRP1/TYROBP/S100A10/CX3CL1/WNT2/FGA/TNF/EGR2/PDE3A/FLNA/LRP1/NPTN/MAP3K13/ROBO1	25
BP	GO:0015908	fatty acid transport	10/982	86/18723	0.0144041	0.0555258	0.0385767	PLA2G2D/APOE/ABCD2/SYK/CD36/ANXA1/MAP2K6/FABP4/ACE/PLA2G5	10
BP	GO:0045921	positive regulation of exocytosis	10/982	86/18723	0.0144041	0.0555258	0.0385767	FGR/IFNG/SYK/SNCA/PTAFR/RAB27B/FGA/ITGB2/HLA-F/SDCBP	10
BP	GO:0048864	stem cell development	10/982	86/18723	0.0144041	0.0555258	0.0385767	PTPRC/ACVR1/SEMA4D/SEMA3C/ANXA6/NRP1/EDNRB/JAG1/EDNRA/NRTN	10
BP	GO:0008361	regulation of cell size	17/982	181/18723	0.014548	0.0559993	0.0389056	PLEK/KCNN4/APOE/IL7R/SEMA4D/SEMA3C/LIMK1/CXCL12/TRPV2/NRP1/P2RX7/VAV1/FGF13/KCNMA1/AQP4/LRP1/MAP3K13	17
BP	GO:0030323	respiratory tube development	17/982	181/18723	0.014548	0.0559993	0.0389056	TNC/HECA/SPRY2/HEG1/FOXF1/TCF21/LIPA/HSD11B1/WNT2/TRAF4/CRISPLD2/KLF2/TNF/SFTPD/CEBPA/CTSZ/HOXA5	17
BP	GO:0099054	presynapse assembly	7/982	50/18723	0.0148818	0.0572011	0.0397406	IL1RAP/EFNB2/SNCA/APP/SDCBP/DVL1/GPC4	7
BP	GO:1904036	negative regulation of epithelial cell apoptotic process	7/982	50/18723	0.0148818	0.0572011	0.0397406	HMOX1/TNFAIP3/TEK/CAST/FGA/PAK4/ANGPT1	7
BP	GO:0046470	phosphatidylcholine metabolic process	9/982	74/18723	0.0150274	0.0576908	0.0400809	PLA2G2D/RAB38/NR1H3/PLA2G7/CAPN2/ENPP2/APOC1/PLA2G4C/PLA2G5	9
BP	GO:0050769	positive regulation of neurogenesis	20/982	225/18723	0.0150309	0.0576908	0.0400809	TNFRSF1B/CXCR4/SEMA4D/IFNG/LTA/ASPA/PRKCH/LIMK1/CXCL12/PLXNC1/TRPV2/NRP1/CX3CL1/WNT2/TNF/EGR2/LRP1/NPTN/MAP3K13/ROBO1	20
BP	GO:0009116	nucleoside metabolic process	8/982	62/18723	0.0152757	0.0585036	0.0406455	NT5E/UPP1/APOBEC3G/TK2/TYMP/DGUOK/APOBEC3F/ATIC	8
BP	GO:0010573	vascular endothelial growth factor production	8/982	62/18723	0.0152757	0.0585036	0.0406455	CCR2/CYP1B1/C5AR1/C3/C3AR1/TNF/RORA/ATF4	8
BP	GO:1903078	positive regulation of protein localization to plasma membrane	8/982	62/18723	0.0152757	0.0585036	0.0406455	IFNG/EPHA2/PRKCH/STAC/LGALS3/TNF/RHOG/LRP1	8
BP	GO:0002281	macrophage activation involved in immune response	4/982	19/18723	0.0155006	0.0590669	0.0410369	PLCG2/IFNG/SYK/TYROBP	4
BP	GO:0003085	negative regulation of systemic arterial blood pressure	4/982	19/18723	0.0155006	0.0590669	0.0410369	ADORA1/PRCP/ADRB2/CALCA	4
BP	GO:0006491	N-glycan processing	4/982	19/18723	0.0155006	0.0590669	0.0410369	MGAT4A/MAN1C1/ST8SIA1/MAN1A1	4
BP	GO:0006977	DNA damage response, signal transduction by p53 class mediator resulting in cell cycle arrest	4/982	19/18723	0.0155006	0.0590669	0.0410369	ATM/CDKN1B/PML/SOX4	4
BP	GO:0060216	definitive hemopoiesis	4/982	19/18723	0.0155006	0.0590669	0.0410369	TEK/LYL1/MEIS1/TGFBR3	4
BP	GO:1900221	regulation of amyloid-beta clearance	4/982	19/18723	0.0155006	0.0590669	0.0410369	APOE/IFNG/TNF/LRP1	4
BP	GO:2000319	regulation of T-helper 17 cell differentiation	4/982	19/18723	0.0155006	0.0590669	0.0410369	TBX21/IL12RB1/IL12B/FOXP3	4
BP	GO:0051262	protein tetramerization	10/982	87/18723	0.0155355	0.0591573	0.0410997	MS4A1/EVL/SAMHD1/STK4/B2M/TDO2/SNCA/THG1L/AQP4/MCOLN1	10
BP	GO:0019218	regulation of steroid metabolic process	11/982	100/18723	0.015623	0.0594481	0.0413017	GFI1/APOE/IFNG/BMP6/APOC1/TNF/INSIG2/RORA/ABCG1/PPARGC1A/CLCN2	11
BP	GO:0048565	digestive tract development	13/982	127/18723	0.015951	0.0606525	0.0421385	PRDM1/PDGFC/FOXF1/EDNRB/TCF21/HLX/RARRES2/TNF/TGFB2/CPS1/HOXA5/CLDN18/RB1	13
BP	GO:0032355	response to estradiol	14/982	141/18723	0.0162341	0.0616848	0.0428557	ITGA2/HPGD/ANXA1/IL10/PAM/ETS1/CDKN1B/CAT/HSF1/PPARGC1A/RGS9/TFPI/CRHBP/NRIP1	14
BP	GO:0045913	positive regulation of carbohydrate metabolic process	9/982	75/18723	0.0163082	0.0617338	0.0428897	IFNG/CD244/HRH1/P2RX7/SNCA/PTAFR/KAT2B/APP/PPARGC1A	9
BP	GO:0003209	cardiac atrium morphogenesis	5/982	29/18723	0.0163283	0.0617338	0.0428897	ACVR1/HEG1/WNT2/TGFB2/SOX4	5
BP	GO:0010955	negative regulation of protein processing	5/982	29/18723	0.0163283	0.0617338	0.0428897	CARD8/CST7/CAST/CTSZ/CHAC1	5
BP	GO:0019359	nicotinamide nucleotide biosynthetic process	5/982	29/18723	0.0163283	0.0617338	0.0428897	KMO/IDH2/HAAO/IDO1/PTGIS	5
BP	GO:0019363	pyridine nucleotide biosynthetic process	5/982	29/18723	0.0163283	0.0617338	0.0428897	KMO/IDH2/HAAO/IDO1/PTGIS	5
BP	GO:0033028	myeloid cell apoptotic process	5/982	29/18723	0.0163283	0.0617338	0.0428897	PLEKHO2/PIK3CD/ANXA1/NOD2/CXCR2	5
BP	GO:1903318	negative regulation of protein maturation	5/982	29/18723	0.0163283	0.0617338	0.0428897	CARD8/CST7/CAST/CTSZ/CHAC1	5
BP	GO:0006636	unsaturated fatty acid biosynthetic process	7/982	51/18723	0.0164921	0.0622204	0.0432278	PTGDS/ABCD2/PTGIS/TBXAS1/ANXA1/FADS2/DECR2	7
BP	GO:0014009	glial cell proliferation	7/982	51/18723	0.0164921	0.0622204	0.0432278	LTA/PRKCH/PTK2B/IDH2/CX3CL1/TNF/SOX4	7
BP	GO:0048013	ephrin receptor signaling pathway	7/982	51/18723	0.0164921	0.0622204	0.0432278	EPHA2/RASA1/EFNB2/FYN/EFNA3/MMP9/CHN1	7
BP	GO:0002790	peptide secretion	21/982	242/18723	0.016571	0.0624736	0.0434037	CCL5/IFNG/PPP3CA/JAK2/ADORA1/ANXA1/DPP4/CAMK2N1/ABCA1/RAB8B/FGA/ANO1/TNF/ABCG1/LRP5/LRP1/CYB5R4/GLUL/S100A8/CRHBP/SOX4	21
BP	GO:0051962	positive regulation of nervous system development	23/982	272/18723	0.0166648	0.0627824	0.0436183	TNFRSF1B/AMIGO2/CXCR4/SEMA4D/IFNG/LTA/ASPA/IL1RAP/PRKCH/LIMK1/CXCL12/PLXNC1/TRPV2/NRP1/CX3CL1/WNT2/TNF/EGR2/LRP1/NPTN/MAP3K13/ROBO1/LRRN3	23
BP	GO:0022617	extracellular matrix disassembly	8/982	63/18723	0.016719	0.0629422	0.0437293	CTSS/LCP1/ADAM8/DPP4/ETS1/MMP19/MMP9/LRP1	8
BP	GO:0009394	2'-deoxyribonucleotide metabolic process	6/982	40/18723	0.0170912	0.0639103	0.0444019	UPP1/SAMHD1/NTHL1/DCTD/TYMP/DGUOK	6
BP	GO:0055069	zinc ion homeostasis	6/982	40/18723	0.0170912	0.0639103	0.0444019	LCK/MT1F/MT1E/S100A8/SLC39A4/MT2A	6
BP	GO:0060412	ventricular septum morphogenesis	6/982	40/18723	0.0170912	0.0639103	0.0444019	ACVR1/SLIT3/TGFB2/TGFBR3/ROBO1/SOX4	6
BP	GO:2000045	regulation of G1/S transition of mitotic cell cycle	14/982	142/18723	0.0171722	0.0639103	0.0444019	GPNMB/PTPN6/CCND2/AIF1/ANXA1/CTDSPL/ATM/ADAMTS1/CDKN1B/MYO16/CCL2/PML/RB1/SOX4	14
BP	GO:0051960	regulation of nervous system development	34/982	443/18723	0.0172093	0.0639103	0.0444019	TNFRSF1B/AMIGO2/CXCR4/SEMA4D/IFNG/LTA/ASPA/IL1RAP/PRKCH/ITGAX/SEMA3C/LIMK1/CXCL12/B2M/JAM2/PLXNC1/IDH2/PPP3CA/CST7/TRPV2/NRP1/BHLHE40/CX3CL1/TYMP/WNT2/FGF13/TNF/EGR2/LRP1/CCL11/NPTN/MAP3K13/ROBO1/LRRN3	34
BP	GO:0001765	membrane raft assembly	3/982	11/18723	0.017289	0.0639103	0.0444019	ANXA2/S100A10/CAV2	3
BP	GO:0002327	immature B cell differentiation	3/982	11/18723	0.017289	0.0639103	0.0444019	ATM/SPI1/TRAF3IP2	3
BP	GO:0002357	defense response to tumor cell	3/982	11/18723	0.017289	0.0639103	0.0444019	PRF1/LAPTM5/SPI1	3
BP	GO:0003174	mitral valve development	3/982	11/18723	0.017289	0.0639103	0.0444019	ACVR1/GJA5/SOX4	3
BP	GO:0006054	N-acetylneuraminate metabolic process	3/982	11/18723	0.017289	0.0639103	0.0444019	NPL/NAGK/RENBP	3
BP	GO:0010887	negative regulation of cholesterol storage	3/982	11/18723	0.017289	0.0639103	0.0444019	NR1H3/ABCA1/ABCG1	3
BP	GO:0021702	cerebellar Purkinje cell differentiation	3/982	11/18723	0.017289	0.0639103	0.0444019	HERC1/RORA/AGTPBP1	3
BP	GO:0030656	regulation of vitamin metabolic process	3/982	11/18723	0.017289	0.0639103	0.0444019	GFI1/IFNG/TNF	3
BP	GO:0032610	interleukin-1 alpha production	3/982	11/18723	0.017289	0.0639103	0.0444019	IL16/CASP1/CX3CL1	3
BP	GO:0032650	regulation of interleukin-1 alpha production	3/982	11/18723	0.017289	0.0639103	0.0444019	IL16/CASP1/CX3CL1	3
BP	GO:0033625	positive regulation of integrin activation	3/982	11/18723	0.017289	0.0639103	0.0444019	PLEK/CXCL13/SKAP1	3
BP	GO:0042789	mRNA transcription by RNA polymerase II	3/982	11/18723	0.017289	0.0639103	0.0444019	C5AR1/FLNA/ATF4	3
BP	GO:0044068	modulation by symbiont of host cellular process	3/982	11/18723	0.017289	0.0639103	0.0444019	CD4/SERPINB9/BCL2L1	3
BP	GO:0045628	regulation of T-helper 2 cell differentiation	3/982	11/18723	0.017289	0.0639103	0.0444019	CD86/ANXA1/HLX	3
BP	GO:0051132	NK T cell activation	3/982	11/18723	0.017289	0.0639103	0.0444019	CD300A/IL12B/IL15	3
BP	GO:0070189	kynurenine metabolic process	3/982	11/18723	0.017289	0.0639103	0.0444019	KMO/IDO1/TDO2	3
BP	GO:0071609	chemokine (C-C motif) ligand 5 production	3/982	11/18723	0.017289	0.0639103	0.0444019	SIRPA/IL10/MUL1	3
BP	GO:0071649	regulation of chemokine (C-C motif) ligand 5 production	3/982	11/18723	0.017289	0.0639103	0.0444019	SIRPA/IL10/MUL1	3
BP	GO:1904464	regulation of matrix metallopeptidase secretion	3/982	11/18723	0.017289	0.0639103	0.0444019	TLR4/IDH2/CD200	3
BP	GO:1990773	matrix metallopeptidase secretion	3/982	11/18723	0.017289	0.0639103	0.0444019	TLR4/IDH2/CD200	3
BP	GO:2000343	positive regulation of chemokine (C-X-C motif) ligand 2 production	3/982	11/18723	0.017289	0.0639103	0.0444019	TLR4/TNF/LRP1	3
BP	GO:0062012	regulation of small molecule metabolic process	27/982	334/18723	0.0173774	0.0641926	0.044598	PLEK/SLC2A6/NR1H3/GFI1/APOE/ABCD2/SLC7A7/IFNG/BMP6/PTK2B/CD244/APOC1/CBFA2T3/ANXA1/HRH1/P2RX7/SNCA/PTAFR/KAT2B/TNF/INSIG2/APP/RORA/ABCG1/PPARGC1A/CLCN2/C1QTNF1	27
BP	GO:0046916	cellular transition metal ion homeostasis	12/982	115/18723	0.0175093	0.0646347	0.0449051	LCK/IFNG/BMP6/HMOX1/SLC31A2/MT1F/MT1E/APP/NCOA4/S100A8/SLC39A4/MT2A	12
BP	GO:1904951	positive regulation of establishment of protein localization	26/982	319/18723	0.0175981	0.0649173	0.0451015	HCLS1/TLR4/GZMB/KCNN4/IFNG/BMP6/JAK2/FRMD4A/ADAM8/FYN/RAC2/CAMK2N1/ANK3/FGA/ITGB2/ANO1/TNF/TGFB2/WLS/EDEM1/CD33/FLNA/ABCG1/LRP1/GLUL/SOX4	26
BP	GO:0000082	G1/S transition of mitotic cell cycle	19/982	214/18723	0.0176623	0.0650363	0.0451842	GFI1/ACVR1/GPNMB/PTPN6/CCND2/PPP3CA/AIF1/CRLF3/ANXA1/CTDSPL/ATM/ADAMTS1/CDKN1B/MYO16/CCL2/PML/RB1/PIAS1/SOX4	19
BP	GO:0014823	response to activity	9/982	76/18723	0.0176671	0.0650363	0.0451842	CXCR4/ITGA2/BMP6/IL10/CAB39/RARRES2/CAT/HSF1/PPARGC1A	9
BP	GO:0140029	exocytic process	9/982	76/18723	0.0176671	0.0650363	0.0451842	PLEK/BTK/P2RX1/STX11/SYK/SNCA/RAB8B/RALB/SYTL2	9
BP	GO:0045444	fat cell differentiation	20/982	229/18723	0.0178819	0.0657817	0.045702	CMKLR1/STK4/MAFB/ZFP36L1/ARID5B/FRZB/RARRES2/TNF/EGR2/RUNX1T1/FABP4/RORA/CEBPA/LRP5/OSBPL11/JAG1/PPARGC1A/ADRB2/CREBL2/PIAS1	20
BP	GO:0007498	mesoderm development	13/982	129/18723	0.0179589	0.0660192	0.045867	IKZF1/BTK/ITGA2/ACVR1/EPHA2/ZFP36L1/FOXF1/IKZF3/JAK2/HCK/TIE1/WLS/ITGA8	13
BP	GO:0010657	muscle cell apoptotic process	10/982	89/18723	0.0179944	0.0661039	0.0459259	CAPN2/ARRB2/IFNG/STK4/HMOX1/PTK2B/JAK2/IL12B/HSF1/CXCR2	10
BP	GO:0002791	regulation of peptide secretion	18/982	200/18723	0.0181458	0.0665679	0.0462482	CCL5/IFNG/PPP3CA/JAK2/ADORA1/DPP4/CAMK2N1/RAB8B/FGA/ANO1/TNF/ABCG1/LRP5/LRP1/GLUL/S100A8/CRHBP/SOX4	18
BP	GO:0045216	cell-cell junction organization	18/982	200/18723	0.0181458	0.0665679	0.0462482	PECAM1/EPB41L3/BMP6/EPHA2/PRKCH/HEG1/GJA5/PKP3/CSF1R/CLDN1/TNF/TGFB2/SVEP1/CSK/FLNA/CTNND2/ACE/CLDN18	18
BP	GO:0045010	actin nucleation	7/982	52/18723	0.0182219	0.0667492	0.0463742	WAS/CORO1A/GMFG/EVL/IQGAP2/FCHSD2/GSN	7
BP	GO:1903426	regulation of reactive oxygen species biosynthetic process	7/982	52/18723	0.0182219	0.0667492	0.0463742	TLR4/PLCG2/ABCD2/CD36/FYN/SNCA/TLR6	7
BP	GO:0006940	regulation of smooth muscle contraction	8/982	64/18723	0.018258	0.0667492	0.0463742	P2RX1/ITGA2/CALCRL/ADORA1/PTAFR/KCNMA1/ADRB2/CALCA	8
BP	GO:1903018	regulation of glycoprotein metabolic process	8/982	64/18723	0.018258	0.0667492	0.0463742	CCR7/ITM2A/CCL19/IL33/CCL21/JAK3/IL15/NECAB3	8
BP	GO:1903409	reactive oxygen species biosynthetic process	8/982	64/18723	0.018258	0.0667492	0.0463742	NCF1/TLR4/PLCG2/ABCD2/CD36/FYN/SNCA/TLR6	8
BP	GO:0002834	regulation of response to tumor cell	4/982	20/18723	0.0185889	0.0673564	0.046796	CD226/CRTAM/IL12B/FBXO38	4
BP	GO:0002837	regulation of immune response to tumor cell	4/982	20/18723	0.0185889	0.0673564	0.046796	CD226/CRTAM/IL12B/FBXO38	4
BP	GO:0003159	morphogenesis of an endothelium	4/982	20/18723	0.0185889	0.0673564	0.046796	CXCR4/ITGAX/ACVRL1/CXCL10	4
BP	GO:0003215	cardiac right ventricle morphogenesis	4/982	20/18723	0.0185889	0.0673564	0.046796	SEMA3C/TGFB2/JAG1/SOX4	4
BP	GO:0006837	serotonin transport	4/982	20/18723	0.0185889	0.0673564	0.046796	LILRB1/P2RX1/SYK/SNCA	4
BP	GO:0009110	vitamin biosynthetic process	4/982	20/18723	0.0185889	0.0673564	0.046796	GFI1/IFNG/TNF/CYP27A1	4
BP	GO:0009713	catechol-containing compound biosynthetic process	4/982	20/18723	0.0185889	0.0673564	0.046796	SNCA/MOXD1/TGFB2/HDC	4
BP	GO:0032930	positive regulation of superoxide anion generation	4/982	20/18723	0.0185889	0.0673564	0.046796	SYK/TYROBP/ITGB2/FPR2	4
BP	GO:0042359	vitamin D metabolic process	4/982	20/18723	0.0185889	0.0673564	0.046796	GFI1/IFNG/TNF/CYP27A1	4
BP	GO:0042423	catecholamine biosynthetic process	4/982	20/18723	0.0185889	0.0673564	0.046796	SNCA/MOXD1/TGFB2/HDC	4
BP	GO:0043011	myeloid dendritic cell differentiation	4/982	20/18723	0.0185889	0.0673564	0.046796	IRF4/CSF2/CAMK4/SPI1	4
BP	GO:0061154	endothelial tube morphogenesis	4/982	20/18723	0.0185889	0.0673564	0.046796	CXCR4/ITGAX/ACVRL1/CXCL10	4
BP	GO:2000757	negative regulation of peptidyl-lysine acetylation	4/982	20/18723	0.0185889	0.0673564	0.046796	SNCA/FOXP3/SPI1/TAF7	4
BP	GO:0021782	glial cell development	12/982	116/18723	0.0186315	0.0674185	0.0468392	TLR4/IFNG/C1QA/ASPA/C5AR1/TNF/APP/FPR2/ROR1/LRP1/S100A8/SOX4	12
BP	GO:0033559	unsaturated fatty acid metabolic process	12/982	116/18723	0.0186315	0.0674185	0.0468392	PTGDS/ABCD2/HPGD/CYP1B1/PTGIS/TBXAS1/ANXA1/AKR1C1/MGLL/FADS2/PLA2G4C/DECR2	12
BP	GO:0010669	epithelial structure maintenance	5/982	30/18723	0.0187703	0.0675986	0.0469643	TLR4/LDB2/NOD2/MKS1/MUC13	5
BP	GO:0034368	protein-lipid complex remodeling	5/982	30/18723	0.0187703	0.0675986	0.0469643	PLA2G7/APOE/APOC1/ABCG1/PLA2G5	5
BP	GO:0034369	plasma lipoprotein particle remodeling	5/982	30/18723	0.0187703	0.0675986	0.0469643	PLA2G7/APOE/APOC1/ABCG1/PLA2G5	5
BP	GO:0051125	regulation of actin nucleation	5/982	30/18723	0.0187703	0.0675986	0.0469643	WAS/CORO1A/GMFG/FCHSD2/GSN	5
BP	GO:0051491	positive regulation of filopodium assembly	5/982	30/18723	0.0187703	0.0675986	0.0469643	CCR7/CCL21/NRP1/DNM3/GPM6A	5
BP	GO:0051968	positive regulation of synaptic transmission, glutamatergic	5/982	30/18723	0.0187703	0.0675986	0.0469643	CCR2/KMO/PTK2B/CCL2/GLUL	5
BP	GO:0060603	mammary gland duct morphogenesis	5/982	30/18723	0.0187703	0.0675986	0.0469643	EPHA2/CSF1R/LRP5/CCL11/PML	5
BP	GO:1990138	neuron projection extension	16/982	172/18723	0.0188962	0.0680057	0.0472472	CXCR4/APOE/SEMA4D/SEMA3C/LIMK1/CXCL12/ITGA4/TRPV2/SLIT3/NRP1/CYFIP2/MUL1/LRP1/MAP3K13/DVL1/IQGAP1	16
BP	GO:0060485	mesenchyme development	24/982	291/18723	0.0193107	0.0694507	0.0482511	ACVR1/SEMA4D/SPRY2/SEMA3C/ZFP36L1/ANXA6/FOXF1/ACVRL1/NRP1/EDNRB/STAT1/TCF21/WNT2/FRZB/TGFB2/FLNA/MEOX1/SDCBP/JAG1/HOXA5/TGFBR3/EDNRA/ROBO1/NRTN	24
BP	GO:0023061	signal release	35/982	463/18723	0.0194332	0.0698437	0.0485241	PRKCB/CCL5/LILRB1/BTK/P2RX1/STX11/KMO/IFNG/BMP6/CXCL12/SYK/PPP3CA/JAK2/ADORA1/ANXA1/DPP4/SYT11/SNCA/MAP2K6/CAMK2N1/ABCA1/RAB8B/FGA/ANO1/TNF/WLS/ABCG1/LRP5/LRP1/CYB5R4/C1QTNF1/DVL1/GLUL/CRHBP/SOX4	35
BP	GO:0003007	heart morphogenesis	21/982	246/18723	0.0195337	0.0701577	0.0487422	S1PR1/ACVR1/SEMA3C/HEG1/TEK/FOXF1/ACVRL1/SLIT3/GJA5/NRP1/LY6E/WNT2/ADAMTS1/MICAL2/TGFB2/FLNA/MKS1/JAG1/TGFBR3/ROBO1/SOX4	21
BP	GO:0090087	regulation of peptide transport	18/982	202/18723	0.0198662	0.0713035	0.0495383	CCL5/IFNG/PPP3CA/JAK2/ADORA1/DPP4/CAMK2N1/RAB8B/FGA/ANO1/TNF/ABCG1/LRP5/LRP1/GLUL/S100A8/CRHBP/SOX4	18
BP	GO:0046503	glycerolipid catabolic process	8/982	65/18723	0.0198958	0.0713616	0.0495787	PLA2G7/PIK3CG/ENPP2/APOC1/MGLL/PLA2G4C/CPS1/PLA2G5	8
BP	GO:0045806	negative regulation of endocytosis	7/982	53/18723	0.0200753	0.0719081	0.0499584	LILRB1/NR1H3/APOC1/CD300A/SYT11/LGALS3/SDCBP	7
BP	GO:0071320	cellular response to cAMP	7/982	53/18723	0.0200753	0.0719081	0.0499584	PIK3CG/ZFP36L1/PTAFR/AQP9/APP/CPS1/CRHBP	7
CC	GO:0009897	external side of plasma membrane	105/1013	421/19550	3.27429e-43	1.81068e-40	1.51996e-40	NT5E/PTPRC/CD48/SLAMF1/CD6/LY9/CXCR6/IL2RG/MS4A1/CD2/CD79B/CD27/CD3E/LILRB1/TLR4/CD3G/CD3D/IL2RB/CD1D/CCR7/CD226/CXCR3/SLAMF7/P2RX1/S1PR1/CD8A/CXCR4/TLR8/CXCR5/CD22/IL7R/ITGA2/CD4/FASLG/CD84/CD5/CXCL9/CD86/CCR2/CCR5/LAG3/CAPN2/CCR1/IL12RB1/CD40LG/CTLA4/CD163/FCGR2B/ITGAX/CD244/EBI3/HEG1/HLA-E/CD28/FCER1G/BTN2A2/TNFRSF14/BTN3A3/CXCL12/CD14/B2M/CXCL10/CD69/OSMR/CD36/ANXA1/KCNJ5/TNFRSF4/CLEC2D/BTN3A…	105
CC	GO:0030667	secretory granule membrane	60/1013	311/19550	5.43303e-19	1.50223e-16	1.26103e-16	PTPRC/TNFRSF1B/CD53/ITGAL/PECAM1/NCKAP1L/LILRB2/DOK3/SELL/P2RX1/LILRB3/CR1/CYBB/STK10/LAIR1/MMP25/ITGAX/LAMP3/FCGR3B/APLP2/KCNAB2/FCER1G/CD14/PSAP/SIRPA/CD36/CD93/ADAM8/CD300A/PLA1A/C5AR1/PCDH7/TYROBP/FPR1/CD58/SNCA/PLAU/LGALS3/CD59/C3AR1/PAM/PRCP/PTAFR/RAB27B/SIGLEC5/IQGAP2/SIGLEC9/ITPR1/MOXD1/ITGB2/CAV2/LAMTOR3/CD33/BST1/RHOG/CXCR2/FPR2/GLIPR1/PHACTR2/IQGAP1	60
CC	GO:0045121	membrane raft	58/1013	335/19550	3.89977e-16	5.39143e-14	4.52578e-14	PTPRC/CD48/TNFRSF1B/ZAP70/MS4A1/CD2/PECAM1/LCK/BTK/LCP2/CD226/P2RX1/S1PR1/CD8A/CR1/CD4/FASLG/INPP5D/SELPLG/BCL10/CAPN2/HMOX1/PTK2B/TEK/CD14/MS4A4A/ANXA2/TLR1/JAK2/MYOF/HCK/PTGIS/CD36/LAT/EDNRB/DPP4/SMURF2/FYN/S100A10/SKAP1/FXYD1/KCNMA1/ABCA1/ITGB2/ANO1/TNF/APP/CAV2/LAMTOR3/CSK/KCNA3/BAALC/SDCBP/TLR6/TFPI/IQGAP1/ARID3A/ANGPT1	58
CC	GO:0098857	membrane microdomain	58/1013	335/19550	3.89977e-16	5.39143e-14	4.52578e-14	PTPRC/CD48/TNFRSF1B/ZAP70/MS4A1/CD2/PECAM1/LCK/BTK/LCP2/CD226/P2RX1/S1PR1/CD8A/CR1/CD4/FASLG/INPP5D/SELPLG/BCL10/CAPN2/HMOX1/PTK2B/TEK/CD14/MS4A4A/ANXA2/TLR1/JAK2/MYOF/HCK/PTGIS/CD36/LAT/EDNRB/DPP4/SMURF2/FYN/S100A10/SKAP1/FXYD1/KCNMA1/ABCA1/ITGB2/ANO1/TNF/APP/CAV2/LAMTOR3/CSK/KCNA3/BAALC/SDCBP/TLR6/TFPI/IQGAP1/ARID3A/ANGPT1	58
CC	GO:0030139	endocytic vesicle	57/1013	336/19550	1.79315e-15	1.98323e-13	1.6648e-13	WAS/NCF1/SLAMF1/CD3G/CD3D/CORO1A/RAB38/CTSS/APOE/IL7R/CD4/CYBB/EREG/ARRB2/STAB1/CTLA4/CD163/CLEC4E/FMNL1/TLR7/NCF4/HLA-E/B2M/SYK/TLR1/GNLY/CD36/ANXA3/ADAM8/DPP4/SYT11/ITGB5/SFTPC/RAC2/TAP1/ABCA1/RAB8B/HLA-F/SFTPD/WLS/HLA-DPB1/CD207/HLA-DPA1/NOD2/MCOLN1/MSR1/TAP2/TLR6/LRP1/ADRB2/UVRAG/SCARB2/CDC42EP4/FCGR1A/PLA2G5/HLA-DRA/HSP90B1	57
CC	GO:0045335	phagocytic vesicle	33/1013	137/19550	7.11314e-14	6.55594e-12	5.50332e-12	WAS/NCF1/SLAMF1/CORO1A/RAB38/CTSS/CYBB/CLEC4E/FMNL1/TLR7/NCF4/HLA-E/B2M/SYK/TLR1/GNLY/CD36/ANXA3/ADAM8/SYT11/ITGB5/RAC2/TAP1/ABCA1/RAB8B/HLA-F/NOD2/MCOLN1/TAP2/TLR6/UVRAG/CDC42EP4/PLA2G5	33
CC	GO:0001772	immunological synapse	19/1013	44/19550	1.30673e-13	1.03232e-11	8.66567e-12	CD6/CD53/ZAP70/CD3E/RHOH/GZMA/LCK/CORO1A/CD37/PRKCQ/GZMB/CRTAM/BCL10/CD28/LAT/LGALS3/SKAP1/NPTN/HLA-DRA	19
CC	GO:0101002	ficolin-1-rich granule	37/1013	185/19550	1.04326e-12	7.21156e-11	6.05368e-11	BIN2/NCKAP1L/GMFG/FGL2/LILRB2/DOK3/CTSS/PLEKHO2/CR1/ITGAX/FCER1G/SIRPA/COTL1/CD93/ADAM8/CD300A/FPR1/CD58/LGALS3/FCN1/PRCP/CAB39/MNDA/SIGLEC5/CRISPLD2/ITGB2/GYG1/HK3/CTSZ/CFD/MMP9/CAT/CTSB/FPR2/GSN/PGM1/MVP	37
CC	GO:0070820	tertiary granule	34/1013	164/19550	2.99254e-12	1.83875e-10	1.54352e-10	CD53/NCKAP1L/LILRB2/DOK3/CTSS/CR1/CYBB/LAIR1/CFP/METTL7A/ITGAX/PTPN6/KCNAB2/FCER1G/B2M/SIRPA/LYZ/CD93/ADAM8/CD300A/FPR1/CD58/PLAU/LGALS3/CD59/PRCP/PTAFR/SIGLEC5/ITGB2/LAMTOR3/CD33/MMP9/FPR2/PGM1	34
CC	GO:0030666	endocytic vesicle membrane	34/1013	193/19550	3.21667e-10	1.77882e-08	1.49321e-08	CD3G/CD3D/CORO1A/RAB38/APOE/IL7R/CD4/CYBB/EREG/STAB1/CD163/CLEC4E/HLA-E/B2M/TLR1/CD36/ANXA3/RAC2/TAP1/RAB8B/HLA-F/WLS/HLA-DPB1/CD207/HLA-DPA1/MCOLN1/MSR1/TAP2/TLR6/LRP1/ADRB2/SCARB2/FCGR1A/HLA-DRA	34
CC	GO:0005925	focal adhesion	53/1013	418/19550	1.58188e-09	7.95255e-08	6.67569e-08	PTPRC/IL16/SLA/LPXN/ITGB7/APBB1IP/EVL/ITGA2/LCP1/CAPN2/CDC42EP1/TNC/EPHA2/LAP3/PTK2B/EFNB2/ANXA6/LIMK1/TEK/B2M/BCAR3/ITGA4/JAK2/HCK/NRP1/ANXA1/DPP4/ITGB5/PTPN12/PLAU/CD59/RAC2/DST/ITGB2/STARD8/CAV2/GIT2/LAMTOR3/ITGA8/FLNA/GNA12/PAK4/CAT/PROCR/SDCBP/RHOG/LRP1/EPB41L2/SCARB2/GSN/RPL8/IQGAP1/HSP90B1	53
CC	GO:0030055	cell-substrate junction	53/1013	425/19550	2.85262e-09	1.31458e-07	1.10351e-07	PTPRC/IL16/SLA/LPXN/ITGB7/APBB1IP/EVL/ITGA2/LCP1/CAPN2/CDC42EP1/TNC/EPHA2/LAP3/PTK2B/EFNB2/ANXA6/LIMK1/TEK/B2M/BCAR3/ITGA4/JAK2/HCK/NRP1/ANXA1/DPP4/ITGB5/PTPN12/PLAU/CD59/RAC2/DST/ITGB2/STARD8/CAV2/GIT2/LAMTOR3/ITGA8/FLNA/GNA12/PAK4/CAT/PROCR/SDCBP/RHOG/LRP1/EPB41L2/SCARB2/GSN/RPL8/IQGAP1/HSP90B1	53
CC	GO:0070821	tertiary granule membrane	19/1013	73/19550	3.52671e-09	1.50021e-07	1.25934e-07	CD53/LILRB2/CYBB/LAIR1/ITGAX/KCNAB2/FCER1G/SIRPA/CD93/ADAM8/CD300A/PLAU/CD59/PTAFR/SIGLEC5/ITGB2/LAMTOR3/CD33/FPR2	19
CC	GO:0009898	cytoplasmic side of plasma membrane	30/1013	172/19550	4.48818e-09	1.77283e-07	1.48819e-07	PTPRC/ZAP70/CD2/SLA/LCK/PTPN7/LILRB4/FGR/GM2A/PTK2B/CYLD/KCNAB2/SYK/PPP3CA/HCK/STAC/FYN/GNG12/RGS1/CYTH3/TRAF3/GNG7/CAV2/FER/GNA12/RASA3/PTPN22/HIP1/LITAF/IQGAP1	30
CC	GO:0001891	phagocytic cup	12/1013	28/19550	4.94104e-09	1.8216e-07	1.52912e-07	ARHGAP25/BIN2/TLR4/CORO1A/LCP1/CLEC4E/AIF1/ANXA1/SYT11/TNF/MCOLN1/SH3BP1	12
CC	GO:0101003	ficolin-1-rich granule membrane	17/1013	61/19550	7.5762e-09	2.52367e-07	2.11847e-07	NCKAP1L/LILRB2/DOK3/CR1/ITGAX/FCER1G/SIRPA/CD93/ADAM8/CD300A/FPR1/CD58/LGALS3/PRCP/SIGLEC5/ITGB2/FPR2	17
CC	GO:0062023	collagen-containing extracellular matrix	52/1013	425/19550	7.75813e-09	2.52367e-07	2.11847e-07	ADAMDEC1/FGL2/CTSS/APOE/CFP/TNC/C1QA/C1QB/ANXA6/SERPING1/CXCL12/ABI3BP/PSAP/ANXA2/EGFL6/TGFBI/ANXA1/A2M/SPARCL1/FBLN1/S100A10/ITIH5/FBLN5/MMRN1/LGALS3/FCN1/SERPINB9/COL14A1/MMP28/WNT2/ADAMTS1/DST/ANXA2P2/FGA/RARRES2/DCN/MFAP4/TGFB2/ADAMTS8/CTSZ/SERPINB1/MMP9/DPT/CTSB/EMILIN2/EDIL3/GPC4/MXRA7/HSP90B1/ANGPT1/S100A8/COL8A1	52
CC	GO:0098802	plasma membrane signaling receptor complex	41/1013	306/19550	2.38682e-08	7.33283e-07	6.15547e-07	CD247/ZAP70/ITGAL/IL18RAP/CSF2RB/CD79B/CD3E/TRAT1/CD3G/CD3D/IL2RB/ITGB7/APBB1IP/CD8A/ITGA2/CD4/ACVR1/IL12RB1/CALCRL/ITGAX/PTPN6/PTK2B/TSPAN32/B2M/SYK/ITGA4/TLR1/ACVRL1/OSMR/ITGB5/SKAP1/TRAF3/TRAF4/ITGB2/IL2RA/ITGA8/IL18R1/IL27RA/SDCBP/TLR6/IL13RA1	41
CC	GO:0098562	cytoplasmic side of membrane	31/1013	197/19550	3.08556e-08	8.75522e-07	7.34948e-07	PTPRC/ZAP70/CD2/SLA/LCK/PTPN7/LILRB4/FGR/GM2A/PTK2B/CYLD/KCNAB2/SYK/PPP3CA/HCK/STAC/FYN/GNG12/RGS1/CYTH3/TRAF3/PTPN1/GNG7/CAV2/FER/GNA12/RASA3/PTPN22/HIP1/LITAF/IQGAP1	31
CC	GO:0035579	specific granule membrane	20/1013	91/19550	3.16644e-08	8.75522e-07	7.34948e-07	TNFRSF1B/CD53/ITGAL/P2RX1/CYBB/STK10/LAIR1/MMP25/KCNAB2/CD36/CD93/ADAM8/PLAU/CD59/C3AR1/ITGB2/LAMTOR3/CD33/BST1/FPR2	20
CC	GO:0042581	specific granule	27/1013	160/19550	5.39735e-08	1.4213e-06	1.1931e-06	TNFRSF1B/DOCK2/CD53/ITGAL/P2RX1/CYBB/STK10/LAIR1/CFP/MMP25/PTPN6/KCNAB2/B2M/LYZ/CD36/ANXA3/CD93/ADAM8/PLAU/CD59/C3AR1/ITGB2/LAMTOR3/CTSZ/CD33/BST1/FPR2	27
CC	GO:0005884	actin filament	22/1013	114/19550	7.96236e-08	2.00145e-06	1.6801e-06	WAS/HCLS1/WIPF1/CORO1A/PSTPIP1/LCP1/PDLIM4/TEK/PLS3/COTL1/GAS7/AIF1/HCK/ANXA1/FYN/GNG12/MYO5A/RAC2/MICAL2/MYO9B/FLNA/IQGAP1	22
CC	GO:0019897	extrinsic component of plasma membrane	28/1013	174/19550	8.75682e-08	2.10544e-06	1.76739e-06	ZAP70/SLA/LCK/FGR/PTK2B/CYLD/KCNAB2/SYK/ANXA2/PPP3CA/HCK/STAC/ANXA1/FYN/GNG12/S100A10/RGS1/FCN1/CDH3/CYTH3/WNT2/GNG7/CAV2/FER/GNA12/SYTL2/HIP1/IQGAP1	28
CC	GO:0098636	protein complex involved in cell adhesion	12/1013	36/19550	1.38261e-07	3.18576e-06	2.67426e-06	ITGAL/ITGB7/ITGA2/CTLA4/ITGAX/TSPAN32/CD28/JAM2/ITGA4/ITGB5/ITGB2/ITGA8	12
CC	GO:0031234	extrinsic component of cytoplasmic side of plasma membrane	20/1013	101/19550	1.97831e-07	4.37603e-06	3.67341e-06	ZAP70/SLA/LCK/FGR/PTK2B/CYLD/KCNAB2/SYK/HCK/STAC/FYN/GNG12/RGS1/CYTH3/GNG7/CAV2/FER/GNA12/HIP1/IQGAP1	20
CC	GO:0042611	MHC protein complex	10/1013	25/19550	2.13885e-07	4.54916e-06	3.81875e-06	HLA-DOB/HLA-E/B2M/HLA-DMB/HLA-DOA/HLA-F/HLA-DPB1/HLA-DPA1/HLA-DMA/HLA-DRA	10
CC	GO:0019898	extrinsic component of membrane	39/1013	309/19550	2.58368e-07	5.29177e-06	4.44212e-06	NCF1/ZAP70/SLA/LCK/PIK3CG/FGR/PIK3R5/PTK2B/CYLD/PIK3CD/KCNAB2/SYK/ANXA2/PPP3CA/HCK/STAC/SNX10/ANXA1/FYN/GNG12/S100A10/RGS1/FCN1/CDH3/CYTH3/WNT2/GNG7/MGLL/CAV2/FER/WDFY3/GNA12/BST1/NAAA/SYTL2/HIP1/IQGAP1/PML/PIK3C2B	39
CC	GO:0042613	MHC class II protein complex	8/1013	17/19550	8.08362e-07	1.59652e-05	1.34018e-05	HLA-DOB/B2M/HLA-DMB/HLA-DOA/HLA-DPB1/HLA-DPA1/HLA-DMA/HLA-DRA	8
CC	GO:0060205	cytoplasmic vesicle lumen	39/1013	325/19550	9.46905e-07	1.80565e-05	1.51574e-05	DOCK2/BIN2/GMFG/FGR/FASLG/GM2A/CFP/MAN2B1/PTPN6/SERPING1/SRGN/B2M/ANXA2/COTL1/LYZ/A2M/CTSW/MMRN1/C3/FCN1/CAB39/MNDA/CRISPLD2/FGA/RARRES2/APP/GYG1/TGFB2/HK3/S100P/CTSZ/SERPINB1/CFD/CAT/SDCBP/GSN/MVP/PCSK1/S100A8	39
CC	GO:0031983	vesicle lumen	39/1013	327/19550	1.10523e-06	2.0373e-05	1.71019e-05	DOCK2/BIN2/GMFG/FGR/FASLG/GM2A/CFP/MAN2B1/PTPN6/SERPING1/SRGN/B2M/ANXA2/COTL1/LYZ/A2M/CTSW/MMRN1/C3/FCN1/CAB39/MNDA/CRISPLD2/FGA/RARRES2/APP/GYG1/TGFB2/HK3/S100P/CTSZ/SERPINB1/CFD/CAT/SDCBP/GSN/MVP/PCSK1/S100A8	39
CC	GO:0034774	secretory granule lumen	38/1013	322/19550	1.95841e-06	3.49355e-05	2.93263e-05	DOCK2/BIN2/GMFG/FGR/GM2A/CFP/MAN2B1/PTPN6/SERPING1/SRGN/B2M/ANXA2/COTL1/LYZ/A2M/CTSW/MMRN1/C3/FCN1/CAB39/MNDA/CRISPLD2/FGA/RARRES2/APP/GYG1/TGFB2/HK3/S100P/CTSZ/SERPINB1/CFD/CAT/SDCBP/GSN/MVP/PCSK1/S100A8	38
CC	GO:0005911	cell-cell junction	51/1013	494/19550	2.2144e-06	3.82676e-05	3.21234e-05	WAS/CD53/ITK/ZAP70/CD2/PECAM1/CD3E/CORO1A/LCP2/CDC42EP1/EPB41L3/EPHA2/PTPN6/EFNB2/HEG1/PDLIM4/TEK/JAM2/ANXA2/PPP3CA/FRMD4A/GJA5/PKP3/LAT/ANXA1/DPP4/GRB2/SKAP1/CDH3/CYTH3/TMEM47/VAV1/TRAF4/FXYD1/FGF13/EPCAM/ANK3/CLDN1/APP/CSK/FLNA/PAK4/CTNND2/SDCBP/JAG1/CDC42EP4/IQGAP1/CLDN18/DES/SH3BP1/PMP22	51
CC	GO:1904813	ficolin-1-rich granule lumen	20/1013	124/19550	5.74002e-06	9.61887e-05	8.07447e-05	BIN2/GMFG/FGL2/CTSS/PLEKHO2/COTL1/FCN1/CAB39/MNDA/CRISPLD2/GYG1/HK3/CTSZ/CFD/MMP9/CAT/CTSB/GSN/PGM1/MVP	20
CC	GO:0030670	phagocytic vesicle membrane	15/1013	76/19550	6.82572e-06	0.000111018	9.31933e-05	CORO1A/RAB38/CYBB/CLEC4E/HLA-E/B2M/TLR1/ANXA3/RAC2/TAP1/RAB8B/HLA-F/MCOLN1/TAP2/TLR6	15
CC	GO:0044853	plasma membrane raft	19/1013	116/19550	7.75969e-06	0.000122603	0.000102918	MS4A1/LCP2/CD8A/CR1/FASLG/SELPLG/HMOX1/MS4A4A/JAK2/MYOF/HCK/PTGIS/CD36/SKAP1/FXYD1/KCNMA1/ITGB2/CAV2/TFPI	19
CC	GO:0005767	secondary lysosome	7/1013	17/19550	1.208e-05	0.000185562	0.000155768	NCF1/NCF4/ADAM8/NCOA4/PLEKHM1/PLA2G5/CRHBP	7
CC	GO:0045334	clathrin-coated endocytic vesicle	16/1013	91/19550	1.59908e-05	0.000238998	0.000200625	CD3G/CD3D/APOE/IL7R/CD4/EREG/CTLA4/SFTPC/SFTPD/HLA-DPB1/CD207/HLA-DPA1/ADRB2/SCARB2/FCGR1A/HLA-DRA	16
CC	GO:0008305	integrin complex	9/1013	31/19550	1.86168e-05	0.000267088	0.000224204	ITGAL/ITGB7/ITGA2/ITGAX/TSPAN32/ITGA4/ITGB5/ITGB2/ITGA8	9
CC	GO:0031252	cell leading edge	43/1013	422/19550	1.88362e-05	0.000267088	0.000224204	ARHGEF6/TLR4/WIPF1/CORO1A/PLEK/PLCG2/PSTPIP1/APBB1IP/CXCR4/EVL/SAMSN1/RASGRP2/FGR/LCP1/EPB41L3/EPHA2/RASA1/SPRY2/PTK2B/PLEKHO1/FGD2/LIMK1/PDLIM4/ANXA2/LDB2/AIF1/ADORA1/DPP4/KLHL2/MYO5A/RAC2/CYTH3/IQGAP2/KSR1/MEFV/DST/APP/FER/WLS/CCDC88A/ITGA8/IQGAP1/SH3BP1	43
CC	GO:0030135	coated vesicle	33/1013	299/19550	3.61931e-05	0.00050037	0.000420031	CD3G/CD3D/DENND1C/APOE/IL7R/CD4/EREG/CTLA4/HLA-E/B2M/AP1S2/SYT11/CD59/SFTPC/RAB27B/RAB8B/HLA-F/APP/SFTPD/HLA-DPB1/CD207/HLA-DPA1/CCDC88A/CTSZ/TMED3/LRP1/ADRB2/HIP1/DVL1/SCARB2/YIPF5/FCGR1A/HLA-DRA	33
CC	GO:0005765	lysosomal membrane	40/1013	395/19550	4.19021e-05	0.000551711	0.000463128	TRAF3IP3/CD1D/SLC2A6/TLR8/LAPTM5/SLC29A3/HLA-DOB/LAMP3/TLR7/ANXA6/SLC15A3/MFSD1/PSAP/ANXA2/AP1S2/DPP4/TM6SF1/SYT11/GPR137B/FPR1/HLA-DMB/C3AR1/PRCP/RNF13/OSTM1/HLA-DOA/HLA-F/ATP6V1B2/HLA-DPB1/HLA-DPA1/LAMTOR3/HLA-DMA/MCOLN1/GLIPR1/LRP1/LITAF/SCARB2/PLEKHM1/HLA-DRA/SLC36A1	40
CC	GO:0098852	lytic vacuole membrane	40/1013	395/19550	4.19021e-05	0.000551711	0.000463128	TRAF3IP3/CD1D/SLC2A6/TLR8/LAPTM5/SLC29A3/HLA-DOB/LAMP3/TLR7/ANXA6/SLC15A3/MFSD1/PSAP/ANXA2/AP1S2/DPP4/TM6SF1/SYT11/GPR137B/FPR1/HLA-DMB/C3AR1/PRCP/RNF13/OSTM1/HLA-DOA/HLA-F/ATP6V1B2/HLA-DPB1/HLA-DPA1/LAMTOR3/HLA-DMA/MCOLN1/GLIPR1/LRP1/LITAF/SCARB2/PLEKHM1/HLA-DRA/SLC36A1	40
CC	GO:0031904	endosome lumen	9/1013	35/19550	5.40731e-05	0.000695405	0.000583751	PRF1/CTSS/PDLIM4/B2M/JAK2/SFTPC/IL12B/APP/CTSB	9
CC	GO:0005774	vacuolar membrane	43/1013	444/19550	6.26247e-05	0.000787079	0.000660706	TRAF3IP3/CD1D/SLC2A6/TLR8/LAPTM5/SLC29A3/HLA-DOB/MAN2B1/LAMP3/TLR7/ANXA6/SLC15A3/MFSD1/PSAP/ANXA2/AP1S2/DPP4/TM6SF1/SYT11/GPR137B/FPR1/HLA-DMB/C3AR1/PRCP/RNF13/OSTM1/HLA-DOA/HLA-F/ATP6V1B2/HLA-DPB1/HLA-DPA1/WDFY3/LAMTOR3/HLA-DMA/MCOLN1/GLIPR1/LRP1/UVRAG/LITAF/SCARB2/PLEKHM1/HLA-DRA/SLC36A1	43
CC	GO:0030669	clathrin-coated endocytic vesicle membrane	13/1013	72/19550	7.37979e-05	0.000906895	0.000761284	CD3G/CD3D/APOE/IL7R/CD4/EREG/HLA-DPB1/CD207/HLA-DPA1/ADRB2/SCARB2/FCGR1A/HLA-DRA	13
CC	GO:0030136	clathrin-coated vesicle	24/1013	196/19550	8.17609e-05	0.000982908	0.000825092	CD3G/CD3D/DENND1C/APOE/IL7R/CD4/EREG/CTLA4/AP1S2/SYT11/SFTPC/RAB27B/RAB8B/SFTPD/HLA-DPB1/CD207/HLA-DPA1/LRP1/ADRB2/HIP1/DVL1/SCARB2/FCGR1A/HLA-DRA	24
CC	GO:0031092	platelet alpha granule membrane	6/1013	17/19550	0.000144047	0.00169486	0.00142273	PECAM1/APLP2/CD36/PCDH7/SNCA/PHACTR2	6
CC	GO:0031091	platelet alpha granule	14/1013	91/19550	0.000235575	0.00271402	0.00227825	PECAM1/APLP2/SERPING1/SRGN/CD36/A2M/PCDH7/MMRN1/SNCA/FGA/APP/TGFB2/CFD/PHACTR2	14
CC	GO:0045178	basal part of cell	29/1013	276/19550	0.000246173	0.00277824	0.00233216	MET/CD1D/ITGA2/SLC7A7/GM2A/ARRB2/HPGD/TEK/SLC1A3/ANXA2/ADORA1/ANXA1/C5AR1/NAIP/PRCP/AQP9/EPCAM/DST/ANK3/ABCA8/ABCA1/CLDN1/AQP4/MAP7/CD34/NOD2/LRP1/DLG2/BEST1	29
CC	GO:0030665	clathrin-coated vesicle membrane	16/1013	116/19550	0.000317666	0.00351339	0.00294928	CD3G/CD3D/APOE/IL7R/CD4/EREG/AP1S2/SYT11/HLA-DPB1/CD207/HLA-DPA1/ADRB2/HIP1/SCARB2/FCGR1A/HLA-DRA	16
CC	GO:0001931	uropod	5/1013	13/19550	0.00033565	0.00356951	0.00299639	PSTPIP1/SELPLG/ICAM2/SPN/BST1	5
CC	GO:0031254	cell trailing edge	5/1013	13/19550	0.00033565	0.00356951	0.00299639	PSTPIP1/SELPLG/ICAM2/SPN/BST1	5
CC	GO:0001726	ruffle	21/1013	178/19550	0.000371061	0.00387164	0.00325001	TLR4/WIPF1/PLEK/PLCG2/SAMSN1/RASGRP2/FGR/LCP1/EPHA2/RASA1/SPRY2/PLEKHO1/FGD2/ANXA2/AIF1/KLHL2/MYO5A/CYTH3/KSR1/MEFV/IQGAP1	21
CC	GO:0009925	basal plasma membrane	27/1013	257/19550	0.000397461	0.00407029	0.00341677	MET/CD1D/SLC7A7/GM2A/ARRB2/HPGD/TEK/SLC1A3/ANXA2/ADORA1/ANXA1/C5AR1/NAIP/AQP9/EPCAM/DST/ANK3/ABCA8/ABCA1/CLDN1/AQP4/MAP7/CD34/NOD2/LRP1/DLG2/BEST1	27
CC	GO:0043202	lysosomal lumen	14/1013	97/19550	0.000462522	0.00459165	0.00385441	CTSS/FASLG/GM2A/MAN2B1/PSAP/IDS/LIPA/TCN2/DCN/GYG1/NAAA/CTSB/SCARB2/GPC4	14
CC	GO:0030662	coated vesicle membrane	21/1013	181/19550	0.000464977	0.00459165	0.00385441	CD3G/CD3D/APOE/IL7R/CD4/EREG/HLA-E/B2M/AP1S2/SYT11/CD59/HLA-F/HLA-DPB1/CD207/HLA-DPA1/TMED3/ADRB2/HIP1/SCARB2/FCGR1A/HLA-DRA	21
CC	GO:0002102	podosome	7/1013	29/19550	0.000561323	0.00544581	0.00457144	BIN2/LPXN/LCP1/ADAM8/PTPN12/VCAM1/GSN	7
CC	GO:0005769	early endosome	36/1013	394/19550	0.000718482	0.00685035	0.00575046	CYTIP/TLR4/CORO1A/RAB38/CXCR4/APOE/CD22/CD4/GPNMB/LAMP3/FGD2/SIGLEC1/HLA-E/PDLIM4/B2M/ANXA2/NRP1/ANXA1/PHB/MYO5A/PTPN1/VCAM1/HLA-F/APP/WLS/CD207/SERPINB1/RUSC1/LRP1/ADRB2/AOC3/UVRAG/LITAF/FCGR1A/PML/HLA-DRA	36
CC	GO:0005770	late endosome	28/1013	282/19550	0.000771128	0.0072277	0.00606722	CXCR4/CTSS/SLC29A3/LAMP3/ANXA6/SIGLEC1/STEAP3/PSAP/ANXA2/SLC31A2/CST7/HLA-DMB/SFTPC/MYO5A/IL12B/RNF13/RAB27B/SFTPD/LAMTOR3/HLA-DMA/MCOLN1/OSBPL11/UVRAG/LITAF/SCARB2/PLEKHM1/HLA-DRA/CRHBP	28
CC	GO:0031225	anchored component of membrane	19/1013	170/19550	0.00132981	0.0122564	0.0102885	NT5E/CD48/CD2/DPEP2/VNN2/CD52/MMP25/FCGR3B/CD14/CD59/LY6E/RAB27B/NOD2/ART4/EFNA3/BST1/TFPI/GPC4/ALPL	19
CC	GO:0061702	inflammasome complex	5/1013	17/19550	0.00135676	0.0122998	0.010325	CARD8/CASP1/NAIP/NLRP1/CASP5	5
CC	GO:0005938	cell cortex	29/1013	308/19550	0.0014403	0.0128466	0.0107839	PRKCB/BIN2/HCLS1/RHOH/CYTIP/CORO1A/GYPC/CAPN2/PTK2B/FMNL1/CLIC5/FNBP1/ANXA2/COTL1/MPP1/RAI14/SNCA/RAC2/DST/PLA2G4C/FER/MYO9B/CTSZ/FLNA/RHOG/EPB41L2/GSN/NEDD4/TNFAIP2	29
CC	GO:0042470	melanosome	14/1013	109/19550	0.00149395	0.0129086	0.010836	RAB38/GPNMB/ANXA6/ANXA2/TRPV2/MYO5A/RAB27B/ANXA2P2/ATP6V1B2/SDCBP/CTSB/SYTL2/FASN/HSP90B1	14
CC	GO:0048770	pigment granule	14/1013	109/19550	0.00149395	0.0129086	0.010836	RAB38/GPNMB/ANXA6/ANXA2/TRPV2/MYO5A/RAB27B/ANXA2P2/ATP6V1B2/SDCBP/CTSB/SYTL2/FASN/HSP90B1	14
CC	GO:0005775	vacuolar lumen	19/1013	174/19550	0.00174716	0.0148643	0.0124777	CTSS/FASLG/GM2A/MAN2B1/PSAP/ANXA2/IDS/LYZ/LIPA/C3/MNDA/TCN2/DCN/GYG1/SDCBP/NAAA/CTSB/SCARB2/GPC4	19
CC	GO:0016323	basolateral plasma membrane	23/1013	231/19550	0.0021054	0.0176407	0.0148083	CD1D/SLC7A7/GM2A/ARRB2/HPGD/TEK/ANXA2/ADORA1/ANXA1/C5AR1/NAIP/AQP9/EPCAM/ANK3/ABCA8/ABCA1/CLDN1/AQP4/MAP7/NOD2/LRP1/DLG2/BEST1	23
CC	GO:0032009	early phagosome	4/1013	12/19550	0.00253758	0.0209445	0.0175817	TLR7/SYK/SYT11/PLA2G5	4
CC	GO:0150034	distal axon	27/1013	294/19550	0.0029279	0.0238107	0.0199877	PRKCB/ITGA2/MICAL1/PTK2B/ITGA4/TRPV2/NRP1/ADORA1/SYT11/SNCA/MYO5A/FGF13/APP/CTSZ/FLNA/KCNA3/ROR1/LRP1/DVL1/GPM6A/GLUL/KIF5C/IQGAP1/STMN3/SETX/CALCA/CRHBP	27
CC	GO:0043197	dendritic spine	19/1013	183/19550	0.00310391	0.0248763	0.0208821	SLA/CD3E/PDE4B/ARRB2/FCGR2B/PTK2B/PDLIM4/DOCK10/PPP3CA/ADORA1/SYT11/PALMD/DNM3/APP/ITGA8/DVL1/GPM6A/NEDD4/ABR	19
CC	GO:0044309	neuron spine	19/1013	184/19550	0.00329804	0.0260545	0.0218712	SLA/CD3E/PDE4B/ARRB2/FCGR2B/PTK2B/PDLIM4/DOCK10/PPP3CA/ADORA1/SYT11/PALMD/DNM3/APP/ITGA8/DVL1/GPM6A/NEDD4/ABR	19
CC	GO:0099059	integral component of presynaptic active zone membrane	4/1013	13/19550	0.00351622	0.0273869	0.0229897	P2RX1/SYT11/NPTN/GPM6A	4
CC	GO:0005901	caveola	11/1013	84/19550	0.00397504	0.0305305	0.0256286	FASLG/HMOX1/JAK2/MYOF/HCK/PTGIS/CD36/FXYD1/KCNMA1/CAV2/TFPI	11
CC	GO:0030027	lamellipodium	20/1013	202/19550	0.00422898	0.032036	0.0268923	ARHGEF6/CORO1A/PSTPIP1/APBB1IP/EVL/EPHA2/PTK2B/FGD2/LIMK1/PDLIM4/AIF1/DPP4/KLHL2/RAC2/IQGAP2/MEFV/APP/FER/CCDC88A/SH3BP1	20
CC	GO:0030427	site of polarized growth	18/1013	183/19550	0.00688251	0.0514328	0.0431748	HCLS1/PTK2B/ITGA4/TRPV2/NRP1/SNCA/MYO5A/FGF13/APP/CTSZ/FLNA/LRP1/DVL1/GPM6A/KIF5C/IQGAP1/STMN3/SETX	18
CC	GO:1904724	tertiary granule lumen	8/1013	55/19550	0.00706074	0.0520612	0.0437023	CTSS/CFP/METTL7A/PTPN6/B2M/LYZ/MMP9/PGM1	8
MF	GO:0140375	immune receptor activity	56/988	144/18368	8.43153e-34	7.34387e-31	5.93757e-31	IL10RA/CXCR6/IL2RG/IL18RAP/CSF2RB/LILRB1/IL2RB/CCR7/LILRB2/CXCR3/CMKLR1/KLRD1/CXCR4/CXCR5/LILRB3/IL7R/CR1/CD4/CCR2/IL21R/CCR5/CCR1/IL12RB1/IL1RAP/HLA-DOB/FCGR2B/FPR3/FLT3/EBI3/LILRB5/LILRA6/FCER1G/LILRA4/OSMR/C5AR1/CR2/LILRA1/FPR1/C3AR1/IFNGR2/IL12B/HLA-DOA/IL3RA/HLA-DPA1/CCR6/IL2RA/IL17RA/CCRL2/IL18R1/IL13RA2/IL27RA/CXCR2/FPR2/IL15RA/IL13RA1/HLA-DRA	56
MF	GO:0004896	cytokine receptor activity	35/988	97/18368	2.50009e-20	1.08879e-17	8.80293e-18	IL10RA/CXCR6/IL2RG/IL18RAP/CSF2RB/IL2RB/CCR7/CXCR3/CMKLR1/CXCR4/CXCR5/IL7R/CD4/CCR2/IL21R/CCR5/CCR1/IL12RB1/IL1RAP/FLT3/EBI3/OSMR/IFNGR2/IL12B/IL3RA/CCR6/IL2RA/IL17RA/CCRL2/IL18R1/IL13RA2/IL27RA/CXCR2/IL15RA/IL13RA1	35
MF	GO:0019955	cytokine binding	37/988	139/18368	2.08313e-16	6.04802e-14	4.88987e-14	IL10RA/TNFRSF1B/CXCR6/IL2RG/IL2RB/CCR7/CXCR3/CXCR4/CXCR5/CD4/ACVR1/CCR2/CCR5/CCR1/IL12RB1/IL18BP/EBI3/TNFRSF14/ITGA4/ACVRL1/NRP1/OSMR/CD36/GBP1/A2M/CSF1R/IL12B/IL3RA/CCR6/IL2RA/CCRL2/IL18R1/IL13RA2/IL27RA/CXCR2/IL13RA1/TGFBR3	37
MF	GO:0005126	cytokine receptor binding	49/988	271/18368	5.55035e-14	1.20859e-11	9.77154e-12	CCL5/CXCL13/STAP1/FASLG/CCL4/CCL19/CXCL9/CCR2/IFNG/LTA/IL12RB1/TNFSF8/IL1RAP/CD40LG/LTB/CXCL12/SH2B3/SYK/TNFSF14/CSF2/JAK2/CXCL10/CCL21/OSMR/SMURF2/GRB2/STAT1/IL10/CCL18/CX3CL1/CCL8/IL12B/TRAF3/TRAF4/CXCL11/TNF/TGFB2/CCDC88A/CCRL2/IL27RA/SDCBP/CCL11/IL15/CCL2/IL13RA1/IRAK4/TGFBR3/SIVA1/CCL17	49
MF	GO:0023023	MHC protein complex binding	15/988	36/18368	1.57776e-10	2.74847e-08	2.22216e-08	MS4A1/LILRB1/LILRB2/CD8A/KLRD1/CD4/HLA-DOB/B2M/HLA-DMB/HLA-DOA/HLA-DPB1/HLA-DPA1/HLA-DMA/HLA-DRA/TAPBPL	15
MF	GO:0015026	coreceptor activity	16/988	48/18368	1.92759e-09	2.33964e-07	1.89161e-07	CXCR6/CD8A/CXCR4/CD4/CD86/CCR5/CD28/ITGA4/LILRA4/NRP1/LY96/LRP5/ROR1/LRP1/TGFBR3/GPC4	16
MF	GO:0001618	virus receptor activity	20/988	76/18368	2.09311e-09	2.33964e-07	1.89161e-07	SLAMF1/ITGB7/CXCR4/ITGA2/CR1/CD4/SELPLG/CD86/CCR5/EPHA2/EFNB2/TNFRSF14/DPP4/CR2/TNFRSF4/ITGB5/CD209/CLDN1/SCARB2/SIVA1	20
MF	GO:0001637	G protein-coupled chemoattractant receptor activity	12/988	26/18368	2.6315e-09	2.33964e-07	1.89161e-07	CXCR6/CCR7/CXCR3/CMKLR1/CXCR4/CXCR5/CCR2/CCR5/CCR1/CCR6/CCRL2/CXCR2	12
MF	GO:0004950	chemokine receptor activity	12/988	26/18368	2.6315e-09	2.33964e-07	1.89161e-07	CXCR6/CCR7/CXCR3/CMKLR1/CXCR4/CXCR5/CCR2/CCR5/CCR1/CCR6/CCRL2/CXCR2	12
MF	GO:0140272	exogenous protein binding	20/988	77/18368	2.68615e-09	2.33964e-07	1.89161e-07	SLAMF1/ITGB7/CXCR4/ITGA2/CR1/CD4/SELPLG/CD86/CCR5/EPHA2/EFNB2/TNFRSF14/DPP4/CR2/TNFRSF4/ITGB5/CD209/CLDN1/SCARB2/SIVA1	20
MF	GO:0019956	chemokine binding	13/988	33/18368	6.11419e-09	4.492e-07	3.63182e-07	CXCR6/CCR7/CXCR3/CXCR4/CXCR5/CCR2/CCR5/CCR1/ITGA4/A2M/CCR6/CCRL2/CXCR2	13
MF	GO:0004715	non-membrane spanning protein tyrosine kinase activity	15/988	45/18368	6.18875e-09	4.492e-07	3.63182e-07	ITK/ZAP70/LCK/BTK/FGR/PTK2B/SYK/JAK2/HCK/JAK3/FYN/TXK/FER/CSK/MATK	15
MF	GO:0016493	C-C chemokine receptor activity	11/988	23/18368	7.68219e-09	5.14707e-07	4.16145e-07	CXCR6/CCR7/CXCR3/CXCR4/CXCR5/CCR2/CCR5/CCR1/CCR6/CCRL2/CXCR2	11
MF	GO:0019199	transmembrane receptor protein kinase activity	27/988	143/18368	9.81549e-09	6.10664e-07	4.93726e-07	MET/ITK/ZAP70/LCK/BTK/ACVR1/FGR/EPHA2/PTK2B/FLT3/TEK/SYK/JAK2/ACVRL1/HCK/NRP1/JAK3/CSF1R/FYN/TXK/MAP2K6/TIE1/FER/CSK/EFNA3/MATK/TGFBR3	27
MF	GO:0005125	cytokine activity	36/988	235/18368	1.30743e-08	7.34539e-07	5.93881e-07	IL16/CCL5/CXCL13/FASLG/CCL4/CCL19/CXCL9/IFNG/LTA/BMP6/TNFSF8/CD40LG/LTB/EBI3/IL24/IL33/CXCL12/TNFSF14/CSF2/CXCL10/CCL21/IL10/CCL18/CX3CL1/CCL8/IL12B/WNT2/CXCL11/TNF/TGFB2/CCL11/IL15/FLT3LG/CCL2/CCL17/THPO	36
MF	GO:0019957	C-C chemokine binding	11/988	24/18368	1.34933e-08	7.34539e-07	5.93881e-07	CXCR6/CCR7/CXCR3/CXCR4/CXCR5/CCR2/CCR5/CCR1/CCR6/CCRL2/CXCR2	11
MF	GO:0008009	chemokine activity	15/988	49/18368	2.30848e-08	1.18276e-06	9.56267e-07	CCL5/CXCL13/CCL4/CCL19/CXCL9/CXCL12/CXCL10/CCL21/CCL18/CX3CL1/CCL8/CXCL11/CCL11/CCL2/CCL17	15
MF	GO:0004875	complement receptor activity	8/988	12/18368	2.78049e-08	1.34545e-06	1.08781e-06	CMKLR1/CR1/FPR3/C5AR1/CR2/FPR1/C3AR1/FPR2	8
MF	GO:0042379	chemokine receptor binding	18/988	72/18368	3.1952e-08	1.46475e-06	1.18426e-06	CCL5/CXCL13/CCL4/CCL19/CXCL9/CCR2/CXCL12/CXCL10/CCL21/STAT1/CCL18/CX3CL1/CCL8/CXCL11/CCRL2/CCL11/CCL2/CCL17	18
MF	GO:0038187	pattern recognition receptor activity	11/988	26/18368	3.78061e-08	1.6252e-06	1.31399e-06	CARD8/TLR4/TLR8/CLEC4E/TLR7/CD14/CD36/FCN1/PTAFR/LY96/NOD2	11
MF	GO:0004714	transmembrane receptor protein tyrosine kinase activity	24/988	124/18368	3.9184e-08	1.6252e-06	1.31399e-06	MET/ITK/ZAP70/LCK/BTK/FGR/EPHA2/PTK2B/FLT3/TEK/SYK/JAK2/HCK/NRP1/JAK3/CSF1R/FYN/TXK/MAP2K6/TIE1/FER/CSK/EFNA3/MATK	24
MF	GO:0001664	G protein-coupled receptor binding	40/988	295/18368	6.80506e-08	2.69419e-06	2.17827e-06	CCL5/CXCL13/S1PR1/CCL4/CCL19/CXCL9/CCR2/ARRB2/CXCL12/JAK2/CXCL10/CCL21/ADORA1/EDNRB/PHB/FYN/STAT1/FPR1/CCL18/C3/FCN1/CX3CL1/CCL8/WNT2/DNM3/CXCL11/WLS/ARHGEF11/FLNA/GNA12/CCRL2/SDCBP/ACE/CCL11/CCL2/DVL1/PDE4D/CCL17/NEDD4/CALCA	40
MF	GO:0019903	protein phosphatase binding	26/988	150/18368	1.12224e-07	4.24989e-06	3.43607e-06	PPP1R16B/MET/LILRB1/LCK/LILRB2/LILRB4/KCNN4/CD22/PDLIM4/SIRPA/GRB2/JAK3/STAT1/LGALS3/SKAP1/TRAF3/PTPN1/PHACTR1/CDKN1B/FER/CSK/CD33/MYO16/IQGAP1/MVP/HSP90B1	26
MF	GO:0048020	CCR chemokine receptor binding	14/988	48/18368	1.34107e-07	4.86698e-06	3.93499e-06	CCL5/CXCL13/CCL4/CCL19/CCR2/CCL21/STAT1/CCL18/CX3CL1/CCL8/CCRL2/CCL11/CCL2/CCL17	14
MF	GO:0005178	integrin binding	25/988	144/18368	1.8988e-07	6.61543e-06	5.34863e-06	CD226/ITGB7/ICAM3/ITGA2/LCP1/GPNMB/CD40LG/ITGAX/CXCL12/JAM2/SYK/ITGA4/EGFL6/ICAM2/TGFBI/FBLN1/ITGB5/FBLN5/FCER2/CX3CL1/VCAM1/DST/ITGB2/ADAMTS8/EDIL3	25
MF	GO:0004713	protein tyrosine kinase activity	24/988	136/18368	2.42646e-07	8.12863e-06	6.57206e-06	MET/ITK/ZAP70/LCK/BTK/FGR/EPHA2/PTK2B/FLT3/TEK/SYK/JAK2/HCK/NRP1/JAK3/CSF1R/FYN/TXK/MAP2K6/TIE1/FER/CSK/EFNA3/MATK	24
MF	GO:0001784	phosphotyrosine residue binding	13/988	44/18368	3.1855e-07	1.00511e-05	8.12637e-06	ZAP70/LCK/PLCG2/STAP1/SAMSN1/FGR/RASA1/PTPN6/BCAR3/SYK/HCK/GRB2/VAV1	13
MF	GO:0005164	tumor necrosis factor receptor binding	11/988	31/18368	3.23111e-07	1.00511e-05	8.12637e-06	FASLG/LTA/TNFSF8/CD40LG/LTB/TNFSF14/STAT1/TRAF3/TRAF4/TNF/SIVA1	11
MF	GO:0042608	T cell receptor binding	7/988	11/18368	3.47973e-07	1.04512e-05	8.44988e-06	DOCK2/CD3E/CD3G/LCK/HLA-E/FYN/HLA-DRA	7
MF	GO:0030695	GTPase regulator activity	54/988	488/18368	3.92716e-07	1.10341e-05	8.92113e-06	ARHGAP25/WAS/DOCK2/NCKAP1L/ARHGEF6/ACAP1/RHOH/CYTH4/RASGRP3/DENND1C/RASGRP2/RASA1/MYCBP2/FGD2/HERC1/BCAR3/DOCK10/ADPRH/SIRPA/NRP1/DENND3/GPSM3/TBC1D9/RGS1/ARHGAP10/CYTH3/RCBTB2/VAV1/RASGRP1/IQGAP2/THG1L/DENND2D/STARD8/GIT2/CCDC88A/ARHGEF11/LAMTOR3/MYO9B/DEF6/GMIP/ADAP2/CYSLTR2/RASA3/PREB/RGS9/TBC1D4/GRTP1/IQGAP1/CHN1/DENND4A/ABR/TBC1D2B/SH3BP1/AGAP2	54
MF	GO:0060589	nucleoside-triphosphatase regulator activity	54/988	488/18368	3.92716e-07	1.10341e-05	8.92113e-06	ARHGAP25/WAS/DOCK2/NCKAP1L/ARHGEF6/ACAP1/RHOH/CYTH4/RASGRP3/DENND1C/RASGRP2/RASA1/MYCBP2/FGD2/HERC1/BCAR3/DOCK10/ADPRH/SIRPA/NRP1/DENND3/GPSM3/TBC1D9/RGS1/ARHGAP10/CYTH3/RCBTB2/VAV1/RASGRP1/IQGAP2/THG1L/DENND2D/STARD8/GIT2/CCDC88A/ARHGEF11/LAMTOR3/MYO9B/DEF6/GMIP/ADAP2/CYSLTR2/RASA3/PREB/RGS9/TBC1D4/GRTP1/IQGAP1/CHN1/DENND4A/ABR/TBC1D2B/SH3BP1/AGAP2	54
MF	GO:0001848	complement binding	9/988	21/18368	5.94083e-07	1.61702e-05	1.30737e-05	CR1/CD93/C5AR1/PHB/CR2/CD59/ITGB2/VSIG4/CFB	9
MF	GO:0019902	phosphatase binding	29/988	196/18368	7.01694e-07	1.80935e-05	1.46287e-05	PPP1R16B/MET/LILRB1/LCK/LILRB2/LILRB4/KCNN4/CD22/PVRIG/PDLIM4/SYK/SIRPA/GRB2/JAK3/STAT1/LGALS3/SKAP1/TRAF3/PTPN1/PHACTR1/CDKN1B/FER/CSK/CD33/MYO16/SYTL2/IQGAP1/MVP/HSP90B1	29
MF	GO:0023026	MHC class II protein complex binding	10/988	27/18368	7.06289e-07	1.80935e-05	1.46287e-05	MS4A1/CD4/HLA-DOB/B2M/HLA-DMB/HLA-DOA/HLA-DPB1/HLA-DPA1/HLA-DMA/HLA-DRA	10
MF	GO:0032396	inhibitory MHC class I receptor activity	7/988	12/18368	7.96209e-07	1.98142e-05	1.602e-05	LILRB1/LILRB2/LILRB3/LILRB5/LILRA6/LILRA4/LILRA1	7
MF	GO:0003953	NAD+ nucleosidase activity	10/988	28/18368	1.04582e-06	2.53031e-05	2.04578e-05	IL18RAP/TLR4/TLR8/BANK1/IL1RAP/TLR7/TLR1/IL18R1/BST1/TLR6	10
MF	GO:0045309	protein phosphorylated amino acid binding	14/988	56/18368	1.07852e-06	2.5389e-05	2.05272e-05	ZAP70/LCK/PLCG2/STAP1/SAMSN1/FGR/RASA1/PTPN6/BCAR3/SYK/HCK/GRB2/VAV1/NEDD4	14
MF	GO:0030246	carbohydrate binding	35/988	271/18368	1.41757e-06	3.24922e-05	2.62702e-05	KLRB1/GALNT10/SELL/CD72/KLRD1/CD22/LGALS2/KLRG1/ENPP2/CLEC10A/SIGLEC8/MAN2B1/CLEC4E/SIGLEC1/CLEC1A/SIGLEC7/CD69/CD93/CLEC2D/GALNT3/LGALS3/FCN1/PAM/FCER2/SIGLEC5/SIGLEC9/CD209/GBE1/SFTPD/CD207/HK3/CD33/CD34/HLA-DRA/CLEC2B	35
MF	GO:0005096	GTPase activator activity	50/988	462/18368	2.02225e-06	4.51635e-05	3.65151e-05	ARHGAP25/DOCK2/NCKAP1L/ARHGEF6/ACAP1/CYTH4/RASGRP3/DENND1C/RASGRP2/RASA1/MYCBP2/FGD2/HERC1/BCAR3/DOCK10/ADPRH/NRP1/DENND3/TBC1D9/RGS1/ARHGAP10/CYTH3/RCBTB2/VAV1/RASGRP1/IQGAP2/THG1L/DENND2D/STARD8/GIT2/CCDC88A/ARHGEF11/LAMTOR3/MYO9B/DEF6/GMIP/ADAP2/CYSLTR2/RASA3/PREB/RGS9/TBC1D4/GRTP1/IQGAP1/CHN1/DENND4A/ABR/TBC1D2B/SH3BP1/AGAP2	50
MF	GO:0003779	actin binding	48/988	441/18368	2.75828e-06	6.00616e-05	4.85603e-05	WAS/HCLS1/MYO1F/WIPF1/CORO1A/GMFG/PSTPIP1/CXCR4/EVL/LCP1/CCR5/MICAL1/EPB41L3/FMNL1/ANXA6/PDLIM4/PLS3/VASH1/COTL1/GAS7/LSP1/AIF1/RAI14/GBP1/KLHL2/SNCA/ENC1/MYO5A/PKNOX2/IQGAP2/KCNMA1/MEFV/PHACTR1/DST/MICAL2/CCDC88A/MYO9B/FLNA/MYBPC2/NOD2/MYO16/ACTR3B/RUSC1/PHACTR2/HIP1/EPB41L2/GSN/IQGAP1	48
MF	GO:0051219	phosphoprotein binding	17/988	88/18368	3.79584e-06	8.06384e-05	6.51968e-05	ZAP70/LCK/PLCG2/STAP1/SAMSN1/FGR/RASA1/PTPN6/PLAT/BCAR3/SYK/HCK/GRB2/SNCA/VAV1/NEDD4/RB1	17
MF	GO:0042288	MHC class I protein binding	8/988	20/18368	4.80473e-06	9.96409e-05	8.05605e-05	LILRB1/LILRB2/CD8A/PILRA/CD244/HLA-E/TAP1/TAP2	8
MF	GO:0042169	SH2 domain binding	11/988	40/18368	5.64538e-06	0.000111753	9.03531e-05	SLAMF1/LAX1/LILRB1/LCK/SIT1/BLNK/PTPN6/SYK/JAK2/SKAP1/CCDC88A	11
MF	GO:0042287	MHC protein binding	11/988	40/18368	5.64538e-06	0.000111753	9.03531e-05	LILRB1/LILRB2/CD8A/KLRD1/CD4/LAG3/PILRA/CD244/HLA-E/TAP1/TAP2	11
MF	GO:0050135	NAD(P)+ nucleosidase activity	7/988	16/18368	9.50541e-06	0.000179983	0.000145518	IL18RAP/TLR4/IL1RAP/TLR1/IL18R1/BST1/TLR6	7
MF	GO:0061809	NAD+ nucleotidase, cyclic ADP-ribose generating	7/988	16/18368	9.50541e-06	0.000179983	0.000145518	IL18RAP/TLR4/IL1RAP/TLR1/IL18R1/BST1/TLR6	7
MF	GO:0016799	hydrolase activity, hydrolyzing N-glycosyl compounds	12/988	50/18368	9.97496e-06	0.000184855	0.000149457	IL18RAP/TLR4/TLR8/BANK1/IL1RAP/TLR7/TLR1/ADPRH/NTHL1/IL18R1/BST1/TLR6	12
MF	GO:0043394	proteoglycan binding	10/988	36/18368	1.36663e-05	0.000246875	0.0001996	PTPRC/PLA2G2D/CTSS/APOE/ITGA2/TNC/GPNMB/SDCBP/CTSB/LRP1	10
MF	GO:0030546	signaling receptor activator activity	50/988	495/18368	1.38885e-05	0.000246875	0.0001996	IL16/CCL5/GMFG/CXCL13/FASLG/SEMA4D/CCL4/CCL19/EREG/CXCL9/IFNG/LTA/BMP6/TNFSF8/GPNMB/CD40LG/SEMA3C/PDGFC/LTB/EBI3/IL24/IL33/CXCL12/TNFSF14/CSF2/CXCL10/CCL21/DPP4/IL10/CCL18/LGALS3/CX3CL1/CCL8/TYMP/IL12B/WNT2/FGF13/CXCL11/TNF/APP/TGFB2/JAG1/CCL11/IL15/FLT3LG/CCL2/CCL17/THPO/CALCA/NRTN	50
MF	GO:0032393	MHC class I receptor activity	7/988	17/18368	1.54089e-05	0.000268423	0.000217022	LILRB1/LILRB2/LILRB3/LILRB5/LILRA6/LILRA4/LILRA1	7
MF	GO:0019865	immunoglobulin binding	8/988	23/18368	1.61829e-05	0.000276378	0.000223454	MS4A1/CD22/FCGR2B/FCGR3B/FCER1G/LGALS3/FCER2/FCGR1A	8
MF	GO:0035325	Toll-like receptor binding	6/988	12/18368	1.66579e-05	0.00027902	0.00022559	SYK/TLR1/CD36/LY96/TLR6/S100A8	6
MF	GO:0048018	receptor ligand activity	49/988	487/18368	1.87324e-05	0.000307847	0.000248897	IL16/CCL5/GMFG/CXCL13/FASLG/SEMA4D/CCL4/CCL19/EREG/CXCL9/IFNG/LTA/BMP6/TNFSF8/GPNMB/CD40LG/SEMA3C/PDGFC/LTB/EBI3/IL24/IL33/CXCL12/TNFSF14/CSF2/CXCL10/CCL21/DPP4/IL10/CCL18/LGALS3/CX3CL1/CCL8/TYMP/IL12B/WNT2/FGF13/CXCL11/TNF/TGFB2/JAG1/CCL11/IL15/FLT3LG/CCL2/CCL17/THPO/CALCA/NRTN	49
MF	GO:0043274	phospholipase binding	8/988	24/18368	2.31331e-05	0.000373129	0.000301678	WAS/LCK/BTK/BLNK/BANK1/SYK/FYN/SNCA	8
MF	GO:0001540	amyloid-beta binding	15/988	84/18368	3.70846e-05	0.000587286	0.000474825	TLR4/LILRB2/ITM2A/APOE/ITGA2/C1QA/FCGR2B/CD36/ITGB2/TGFB2/MSR1/TLR6/FPR2/LRP1/ADRB2	15
MF	GO:1990782	protein tyrosine kinase binding	17/988	105/18368	4.29044e-05	0.000667317	0.000539531	CD247/CD2/TRAT1/PLCG2/STAP1/CD4/ACVR1/BLNK/BANK1/ITGAX/SH2B3/SIRPA/DOK2/PTPN1/FLT3LG/ANGPT1/NRTN	17
MF	GO:0004435	phosphatidylinositol phospholipase C activity	8/988	26/18368	4.46318e-05	0.000682005	0.000551406	CCL5/PLCG2/PLCL2/CCR5/CCR1/PLCB2/PLCL1/EDNRA	8
MF	GO:0032813	tumor necrosis factor receptor superfamily binding	11/988	49/18368	4.56037e-05	0.000684842	0.0005537	FASLG/LTA/TNFSF8/CD40LG/LTB/TNFSF14/STAT1/TRAF3/TRAF4/TNF/SIVA1	11
MF	GO:0042277	peptide binding	35/988	321/18368	5.80804e-05	0.000857424	0.000693234	TLR4/CD1D/LILRB2/CMKLR1/ITM2A/APOE/ITGA2/ACVR1/C1QA/CALCRL/FCGR2B/EBI3/HLA-E/CD14/TLR1/PPP3CA/CD36/EDNRB/TAP1/ITGB2/CD209/HLA-F/TGFB2/HLA-DPB1/HLA-DPA1/NOD2/MSR1/TAP2/CAT/TLR6/FPR2/LRP1/ADRB2/HLA-DRA/CRHBP	35
MF	GO:0070851	growth factor receptor binding	20/988	141/18368	6.68633e-05	0.000970633	0.000784764	MS4A1/EREG/IL12RB1/IL1RAP/PDGFC/CSF2/JAK2/GRB2/FYN/IL10/IL12B/APP/FER/CCDC88A/IL27RA/SDCBP/NPTN/HIP1/IRAK4/NRTN	20
MF	GO:0001614	purinergic nucleotide receptor activity	7/988	21/18368	7.62045e-05	0.00107055	0.000865548	P2RY10/GPR171/P2RX1/P2RY13/P2RY14/P2RX7/PTAFR	7
MF	GO:0016502	nucleotide receptor activity	7/988	21/18368	7.62045e-05	0.00107055	0.000865548	P2RY10/GPR171/P2RX1/P2RY13/P2RY14/P2RX7/PTAFR	7
MF	GO:0004629	phospholipase C activity	8/988	28/18368	8.066e-05	0.00109773	0.000887525	CCL5/PLCG2/PLCL2/CCR5/CCR1/PLCB2/PLCL1/EDNRA	8
MF	GO:0046875	ephrin receptor binding	8/988	28/18368	8.066e-05	0.00109773	0.000887525	PIK3CG/EFNB2/GRB2/FYN/PTPN1/EFNA3/SDCBP/CHN1	8
MF	GO:0033691	sialic acid binding	7/988	22/18368	0.000106598	0.00141904	0.00114731	CD22/SIGLEC8/SIGLEC7/FCN1/SIGLEC5/SIGLEC9/CD33	7
MF	GO:0005543	phospholipid binding	45/988	466/18368	0.000107528	0.00141904	0.00114731	NCF1/PLA2G2D/BIN2/BTK/PLA2G7/STAP1/DENND1C/APOE/FGD2/APOC1/ANXA6/NCF4/PSAP/ANXA2/MYOF/ANXA3/SNX10/ANXA1/CD300A/SYT11/SNX7/SNCA/CYTH3/PTAFR/RASGRP1/IQGAP2/ABCA1/PLA2G4C/ANXA2P2/ITPR1/CCDC88A/WDFY3/FCHSD2/ABCG1/ADAP2/SDCBP/JAG1/CPS1/SYTL2/HIP1/SCARB2/GSN/IQGAP1/PIK3C2B/PLA2G5	45
MF	GO:0016004	phospholipase activator activity	6/988	16/18368	0.000119832	0.00155782	0.00125951	CCL5/LCK/BTK/GM2A/FYN/CCL8	6
MF	GO:0004620	phospholipase activity	16/988	104/18368	0.000133314	0.00170759	0.0013806	PLA2G2D/CCL5/PLCG2/PLA2G7/PLCL2/CCR5/CCR1/ENPP2/HMOX1/PLCB2/PLA1A/MGLL/PLA2G4C/PLCL1/EDNRA/PLA2G5	16
MF	GO:0005085	guanyl-nucleotide exchange factor activity	26/988	223/18368	0.00017345	0.0021895	0.00177023	DOCK2/ARHGEF6/CYTH4/RASGRP3/DENND1C/RASGRP2/MYCBP2/FGD2/HERC1/BCAR3/DOCK10/DENND3/CYTH3/RCBTB2/VAV1/RASGRP1/THG1L/DENND2D/CCDC88A/ARHGEF11/LAMTOR3/DEF6/CYSLTR2/PREB/DENND4A/ABR	26
MF	GO:0017124	SH3 domain binding	18/988	130/18368	0.000207247	0.00257874	0.00208493	WAS/NCF1/HCLS1/CD3E/WIPF1/EVL/INPP5D/MICAL1/PTPN6/SIRPA/GRB2/PTPN12/SKAP1/QKI/CABYR/PTPN22/UVRAG/SH3BP1	18
MF	GO:0043028	cysteine-type endopeptidase regulator activity involved in apoptotic process	9/988	40/18368	0.000219298	0.00269027	0.0021751	CD27/CARD8/TNFSF14/CASP1/SNCA/NAIP/SERPINB9/NLRP1/RPS6KA3	9
MF	GO:0045236	CXCR chemokine receptor binding	6/988	18/18368	0.000253163	0.0029798	0.00240919	CXCL13/CXCL9/CXCL12/CXCL10/CX3CL1/CXCL11	6
MF	GO:0060229	lipase activator activity	6/988	18/18368	0.000253163	0.0029798	0.00240919	CCL5/LCK/BTK/GM2A/FYN/CCL8	6
MF	GO:0098641	cadherin binding involved in cell-cell adhesion	6/988	18/18368	0.000253163	0.0029798	0.00240919	CDC42EP1/ANXA2/PKP3/ANXA1/EPCAM/PAK4	6
MF	GO:0051019	mitogen-activated protein kinase binding	7/988	25/18368	0.00026074	0.00302757	0.00244782	ARRB2/MAPKAPK3/PTAFR/NFATC1/MICAL2/ACE/IQGAP1	7
MF	GO:0016798	hydrolase activity, acting on glycosyl bonds	19/988	144/18368	0.000264174	0.00302757	0.00244782	IL18RAP/TLR4/TLR8/GM2A/BANK1/IL1RAP/MAN2B1/TLR7/TLR1/ADPRH/NTHL1/LYZ/MAN1C1/GBE1/EDEM1/IL18R1/BST1/TLR6/MAN1A1	19
MF	GO:0061135	endopeptidase regulator activity	23/988	194/18368	0.000315243	0.00356593	0.00288309	CD27/CARD8/CST6/APLP2/LXN/SERPING1/ANXA2/TNFSF14/CST7/A2M/CAST/CSTA/ITIH5/SNCA/C3/NAIP/SERPINB9/APP/NLRP1/SERPINB1/RPS6KA3/RENBP/TFPI	23
MF	GO:0008528	G protein-coupled peptide receptor activity	19/988	147/18368	0.000344858	0.00385092	0.0031135	CXCR6/CCR7/CXCR3/CMKLR1/CXCR4/CXCR5/CCR2/CCR5/CCR1/CALCRL/FPR3/EDNRB/FPR1/CCR6/CCRL2/CYSLTR2/CXCR2/FPR2/EDNRA	19
MF	GO:0004859	phospholipase inhibitor activity	5/988	13/18368	0.000399099	0.00440019	0.00355759	APOC1/ANXA2/ANXA3/ANXA1/ANXA2P2	5
MF	GO:0033218	amide binding	38/988	400/18368	0.000493938	0.00537775	0.00434795	TLR4/CD1D/LILRB2/CMKLR1/ITM2A/APOE/ITGA2/ACVR1/C1QA/CALCRL/FCGR2B/EBI3/HLA-E/CD14/PSAP/TLR1/PPP3CA/CD36/EDNRB/TAP1/NFATC1/ITGB2/CD209/HLA-F/TGFB2/HLA-DPB1/HLA-DPA1/NOD2/MSR1/TAP2/CAT/TLR6/FPR2/LRP1/ADRB2/FASN/HLA-DRA/CRHBP	38
MF	GO:0042605	peptide antigen binding	8/988	36/18368	0.00053547	0.00575795	0.00465535	HLA-E/TAP1/CD209/HLA-F/HLA-DPB1/HLA-DPA1/TAP2/HLA-DRA	8
MF	GO:0016298	lipase activity	17/988	129/18368	0.000553035	0.00587431	0.00474943	PLA2G2D/CCL5/PLCG2/PLA2G7/PLCL2/CCR5/CCR1/ENPP2/HMOX1/PLCB2/PLA1A/LIPA/MGLL/PLA2G4C/PLCL1/EDNRA/PLA2G5	17
MF	GO:0001653	peptide receptor activity	19/988	153/18368	0.000572373	0.00600646	0.00485628	CXCR6/CCR7/CXCR3/CMKLR1/CXCR4/CXCR5/CCR2/CCR5/CCR1/CALCRL/FPR3/EDNRB/FPR1/CCR6/CCRL2/CYSLTR2/CXCR2/FPR2/EDNRA	19
MF	GO:0005068	transmembrane receptor protein tyrosine kinase adaptor activity	5/988	14/18368	0.000593421	0.00608082	0.00491639	TRAT1/STAP1/BLNK/SH2B3/DOK2	5
MF	GO:0045028	G protein-coupled purinergic nucleotide receptor activity	5/988	14/18368	0.000593421	0.00608082	0.00491639	P2RY10/GPR171/P2RY13/P2RY14/PTAFR	5
MF	GO:0008236	serine-type peptidase activity	22/988	191/18368	0.000627215	0.00635237	0.00513595	GZMA/GZMK/GZMB/GZMH/CTSS/C1S/PLAT/CPVL/ADAM8/DPP4/C1R/PLAU/PRCP/MMP19/CFD/MMP9/ACE/RHBDL1/KLK13/KLK14/PCSK1/CFB	22
MF	GO:0061134	peptidase regulator activity	25/988	230/18368	0.000662046	0.00662807	0.00535885	CD27/CARD8/CST6/APLP2/LXN/SERPING1/ANXA2/TNFSF14/CST7/CASP1/A2M/CAST/CSTA/FBLN1/ITIH5/SNCA/C3/NAIP/SERPINB9/APP/NLRP1/SERPINB1/RPS6KA3/RENBP/TFPI	25
MF	GO:0004866	endopeptidase inhibitor activity	21/988	180/18368	0.000697583	0.00690449	0.00558233	CD27/CST6/APLP2/LXN/SERPING1/ANXA2/TNFSF14/CST7/A2M/CAST/CSTA/ITIH5/SNCA/C3/NAIP/SERPINB9/APP/SERPINB1/RPS6KA3/RENBP/TFPI	21
MF	GO:0004869	cysteine-type endopeptidase inhibitor activity	10/988	56/18368	0.000720554	0.00705171	0.00570137	CD27/CST6/TNFSF14/CST7/CAST/CSTA/SNCA/NAIP/SERPINB9/RPS6KA3	10
MF	GO:0005044	scavenger receptor activity	9/988	47/18368	0.000779486	0.00754369	0.00609913	CD6/CD5/ENPP2/STAB1/CD163/CD36/MSR1/LRP1/SCARB2	9
MF	GO:0038024	cargo receptor activity	12/988	77/18368	0.000793562	0.00759552	0.00614104	CD6/CD5/ENPP2/STAB1/CD163/CD36/ABCA1/ITGB2/MSR1/FPR2/LRP1/SCARB2	12
MF	GO:0017171	serine hydrolase activity	22/988	195/18368	0.000829671	0.00780143	0.00630752	GZMA/GZMK/GZMB/GZMH/CTSS/C1S/PLAT/CPVL/ADAM8/DPP4/C1R/PLAU/PRCP/MMP19/CFD/MMP9/ACE/RHBDL1/KLK13/KLK14/PCSK1/CFB	22
MF	GO:0043027	cysteine-type endopeptidase inhibitor activity involved in apoptotic process	6/988	22/18368	0.000845608	0.00780143	0.00630752	CD27/TNFSF14/SNCA/NAIP/SERPINB9/RPS6KA3	6
MF	GO:0001846	opsonin binding	5/988	15/18368	0.000850902	0.00780143	0.00630752	CR1/CD93/PHB/ITGB2/VSIG4	5
MF	GO:0050664	oxidoreductase activity, acting on NAD(P)H, oxygen as acceptor	5/988	15/18368	0.000850902	0.00780143	0.00630752	NCF1/CYBB/MICAL1/KMO/CYB5R4	5
MF	GO:0008081	phosphoric diester hydrolase activity	13/988	89/18368	0.000915706	0.00830812	0.00671718	CCL5/PDE4B/PLCG2/PLCL2/CCR5/CCR1/ENPP2/HMOX1/PLCB2/PDE3A/PLCL1/PDE4D/EDNRA	13
MF	GO:0098632	cell-cell adhesion mediator activity	9/988	49/18368	0.00106737	0.0095843	0.00774899	CDC42EP1/ANXA2/SIRPA/CD200/PKP3/ANXA1/EPCAM/PAK4/NPTN	9
MF	GO:0098631	cell adhesion mediator activity	10/988	59/18368	0.00109907	0.00976828	0.00789773	ITGA2/CDC42EP1/ANXA2/SIRPA/CD200/PKP3/ANXA1/EPCAM/PAK4/NPTN	10
MF	GO:0030414	peptidase inhibitor activity	21/988	187/18368	0.00114314	0.0100573	0.00813141	CD27/CST6/APLP2/LXN/SERPING1/ANXA2/TNFSF14/CST7/A2M/CAST/CSTA/ITIH5/SNCA/C3/NAIP/SERPINB9/APP/SERPINB1/RPS6KA3/RENBP/TFPI	21
MF	GO:0050700	CARD domain binding	5/988	16/18368	0.00118321	0.0103057	0.00833226	CARD8/CARD10/BCL10/CASP1/NOD2	5
MF	GO:0030159	signaling receptor complex adaptor activity	9/988	50/18368	0.00124056	0.0106983	0.00864966	CD3E/TRAT1/CD3G/STAP1/CARD10/BLNK/SH2B3/DOK2/LAT	9
MF	GO:0035591	signaling adaptor activity	12/988	81/18368	0.00125452	0.0107126	0.00866122	CD3E/TRAT1/CD3G/STAP1/CARD10/BLNK/BANK1/SH2B3/DOK2/LAT/KSR1/IQGAP1	12
MF	GO:0016303	1-phosphatidylinositol-3-kinase activity	4/988	10/18368	0.00134547	0.011161	0.00902376	PIK3CG/PIK3CD/ATM/PIK3C2B	4
MF	GO:0032395	MHC class II receptor activity	4/988	10/18368	0.00134547	0.011161	0.00902376	HLA-DOB/HLA-DOA/HLA-DPA1/HLA-DRA	4
MF	GO:0071723	lipopeptide binding	4/988	10/18368	0.00134547	0.011161	0.00902376	CD1D/CD14/TLR1/TLR6	4
MF	GO:0043621	protein self-association	10/988	61/18368	0.00143171	0.0117643	0.00951155	CCL5/CD2/BCL10/TNFAIP3/FLT3/ADAM8/TMEM43/NLRP1/HSF1/MDH2	10
MF	GO:0005539	glycosaminoglycan binding	24/988	230/18368	0.00147928	0.0120416	0.00973576	PTPRC/PLA2G2D/NELL2/CXCL13/SELL/APOE/STAB1/GPNMB/APLP2/LXN/ANXA6/LYVE1/CXCL10/SLIT3/NRP1/CCL8/ADAMTS1/CRISPLD2/CXCL11/DCN/APP/ADAMTS8/NOD2/TGFBR3	24
MF	GO:0008201	heparin binding	19/988	166/18368	0.00153869	0.0124092	0.010033	PTPRC/PLA2G2D/NELL2/CXCL13/SELL/APOE/GPNMB/APLP2/LXN/CXCL10/SLIT3/NRP1/CCL8/ADAMTS1/CRISPLD2/CXCL11/APP/ADAMTS8/TGFBR3	19
MF	GO:0001530	lipopolysaccharide binding	7/988	33/18368	0.00159063	0.0126893	0.0102594	CD6/TLR4/CD14/P2RX7/PTAFR/LY96/TRIL	7
MF	GO:0043395	heparan sulfate proteoglycan binding	5/988	17/18368	0.00160255	0.0126893	0.0102594	PTPRC/PLA2G2D/APOE/ITGA2/LRP1	5
MF	GO:0019207	kinase regulator activity	24/988	233/18368	0.0017625	0.01383	0.0111817	CCL5/NCKAP1L/RHOH/GMFG/LILRB4/BCL10/STK4/SPRY2/PIK3R5/TCL1A/CCND2/CXCL10/SNCA/RAC2/MAP2K6/CAMK2N1/CAB39/KAT2B/FGF13/CDKN1B/CCNG2/LAMTOR3/IQGAP1/AGAP2	24
MF	GO:0019864	IgG binding	4/988	11/18368	0.00202469	0.0157456	0.0127305	FCGR2B/FCGR3B/FCER1G/FCGR1A	4
MF	GO:0055102	lipase inhibitor activity	5/988	18/18368	0.00212154	0.0163528	0.0132213	APOC1/ANXA2/ANXA3/ANXA1/ANXA2P2	5
MF	GO:0003823	antigen binding	19/988	171/18368	0.00217217	0.0165961	0.0134181	CD48/SLAMF1/CD1D/KLRD1/IL7R/LAG3/HLA-E/ITGA4/SIRPA/LILRA1/FCN1/TAP1/CD209/HLA-F/MFAP4/HLA-DPB1/HLA-DPA1/TAP2/HLA-DRA	19
MF	GO:0042578	phosphoric ester hydrolase activity	33/988	366/18368	0.00263418	0.019886	0.016078	NT5E/PTPRC/CCL5/LCK/PDE4B/PTPN7/PLCG2/DUSP6/PLCL2/INPP5D/SAMHD1/CCR5/CCR1/ENPP2/ACP5/HMOX1/PTPN6/PPP3CA/PLCB2/CTDSPL/PTPRG/PTPN12/PTPN1/DUSP7/DUSP2/PDE3A/PLCL1/PTPN22/PDE4D/EDNRA/ALPL/CA3/LRRK1	33
MF	GO:0004252	serine-type endopeptidase activity	19/988	174/18368	0.00264842	0.019886	0.016078	GZMA/GZMK/GZMB/GZMH/CTSS/C1S/PLAT/ADAM8/DPP4/C1R/PLAU/MMP19/CFD/MMP9/RHBDL1/KLK13/KLK14/PCSK1/CFB	19
MF	GO:0035004	phosphatidylinositol 3-kinase activity	4/988	12/18368	0.00290856	0.0214691	0.017358	PIK3CG/PIK3CD/ATM/PIK3C2B	4
MF	GO:0046790	virion binding	4/988	12/18368	0.00290856	0.0214691	0.017358	SIGLEC1/ANXA2/ANXA2P2/CD209	4
MF	GO:0030971	receptor tyrosine kinase binding	11/988	78/18368	0.0029405	0.0215225	0.0174011	CD2/TRAT1/STAP1/BLNK/ITGAX/SH2B3/DOK2/PTPN1/FLT3LG/ANGPT1/NRTN	11
MF	GO:0031406	carboxylic acid binding	19/988	176/18368	0.0030122	0.0218636	0.0176769	PTGDS/CD22/SIGLEC8/APOC1/SLC1A3/PSAP/SIGLEC7/AKR1C1/FCN1/PAM/SIGLEC5/SIGLEC9/GLDC/FABP4/CD33/CPS1/GLUL/S100A8/SESN1	19
MF	GO:0004175	endopeptidase activity	37/988	430/18368	0.00334617	0.0240869	0.0194744	ADAMDEC1/GZMA/GZMK/GZMB/GZMH/CTSS/CAPN2/MMP25/C1S/PLAT/CASP1/ADAM8/DPP4/CTSW/C1R/PLAU/MMP28/USP25/ADAMTS1/MMP19/PSMB9/PSMB10/ADAMTS8/CTSZ/CFD/MMP9/CTSB/CPS1/ACE/CASP10/RHBDL1/KLK13/ATG4A/KLK14/CASP5/PCSK1/CFB	37
MF	GO:0019838	growth factor binding	16/988	141/18368	0.00380264	0.0271483	0.0219496	IL10RA/IL2RG/IL2RB/CXCL13/ACVR1/EPHA2/FLT3/TEK/ACVRL1/NRP1/OSMR/CD36/A2M/IL2RA/SDCBP/TGFBR3	16
MF	GO:0043325	phosphatidylinositol-3,4-bisphosphate binding	6/988	29/18368	0.00390212	0.0276321	0.0223407	NCF1/PLEK/PLEKHA2/FCHSD2/ADAP2/HIP1	6
MF	GO:0032934	sterol binding	9/988	60/18368	0.00453393	0.0318472	0.0257487	NR1H3/ANXA6/GPR183/ABCA1/INSIG2/RORA/ABCG1/OSBPL11/SCARB2	9
MF	GO:0009931	calcium-dependent protein serine/threonine kinase activity	5/988	23/18368	0.00666417	0.0464359	0.0375438	PRKCB/PRKCQ/PRKCH/MAPKAPK3/CAMK4	5
MF	GO:0051015	actin filament binding	21/988	217/18368	0.00676583	0.0467702	0.0378141	HCLS1/MYO1F/CORO1A/PSTPIP1/LCP1/MICAL1/FMNL1/ANXA6/PLS3/COTL1/GAS7/AIF1/MYO5A/PKNOX2/IQGAP2/FLNA/MYO16/ACTR3B/HIP1/GSN/IQGAP1	21
MF	GO:0019887	protein kinase regulator activity	20/988	204/18368	0.00703897	0.0475934	0.0384796	CCL5/NCKAP1L/GMFG/LILRB4/STK4/SPRY2/TCL1A/CCND2/CXCL10/SNCA/RAC2/MAP2K6/CAMK2N1/CAB39/KAT2B/FGF13/CDKN1B/CCNG2/IQGAP1/AGAP2	20
MF	GO:0004559	alpha-mannosidase activity	4/988	15/18368	0.00704885	0.0475934	0.0384796	MAN2B1/MAN1C1/EDEM1/MAN1A1	4
MF	GO:0004953	icosanoid receptor activity	4/988	15/18368	0.00704885	0.0475934	0.0384796	PTGDR/HPGD/PTGER4/CYSLTR2	4
MF	GO:0004180	carboxypeptidase activity	7/988	43/18368	0.00752711	0.0503931	0.0407432	LAP3/VASH1/CPVL/PRCP/AGTPBP1/CTSZ/ACE	7
MF	GO:0005154	epidermal growth factor receptor binding	6/988	33/18368	0.00757922	0.0503931	0.0407432	MS4A1/EREG/GRB2/FER/CCDC88A/HIP1	6
MF	GO:0010857	calcium-dependent protein kinase activity	5/988	24/18368	0.00805184	0.0531299	0.042956	PRKCB/PRKCQ/PRKCH/MAPKAPK3/CAMK4	5
MF	GO:0004497	monooxygenase activity	12/988	102/18368	0.00858571	0.0562267	0.0454598	MICAL1/KMO/HMOX1/CYP1B1/PTGIS/TBXAS1/FMO2/AKR1C1/PAM/MOXD1/MICAL2/CYP27A1	12
MF	GO:0043548	phosphatidylinositol 3-kinase binding	6/988	34/18368	0.00879376	0.0571594	0.0462139	LCK/CORO1A/JAK2/FYN/PIK3IP1/GSN	6
MF	GO:0015923	mannosidase activity	4/988	16/18368	0.00900407	0.0580929	0.0469686	MAN2B1/MAN1C1/EDEM1/MAN1A1	4
